# Supplementary material for: Simple, reference-independent assessment to empirically guide correction and polishing of hybrid microbial community metagenomic assembly
Source: PeerJ journal article supplement (doi:10.7717/peerj.18132), 2024-11-08

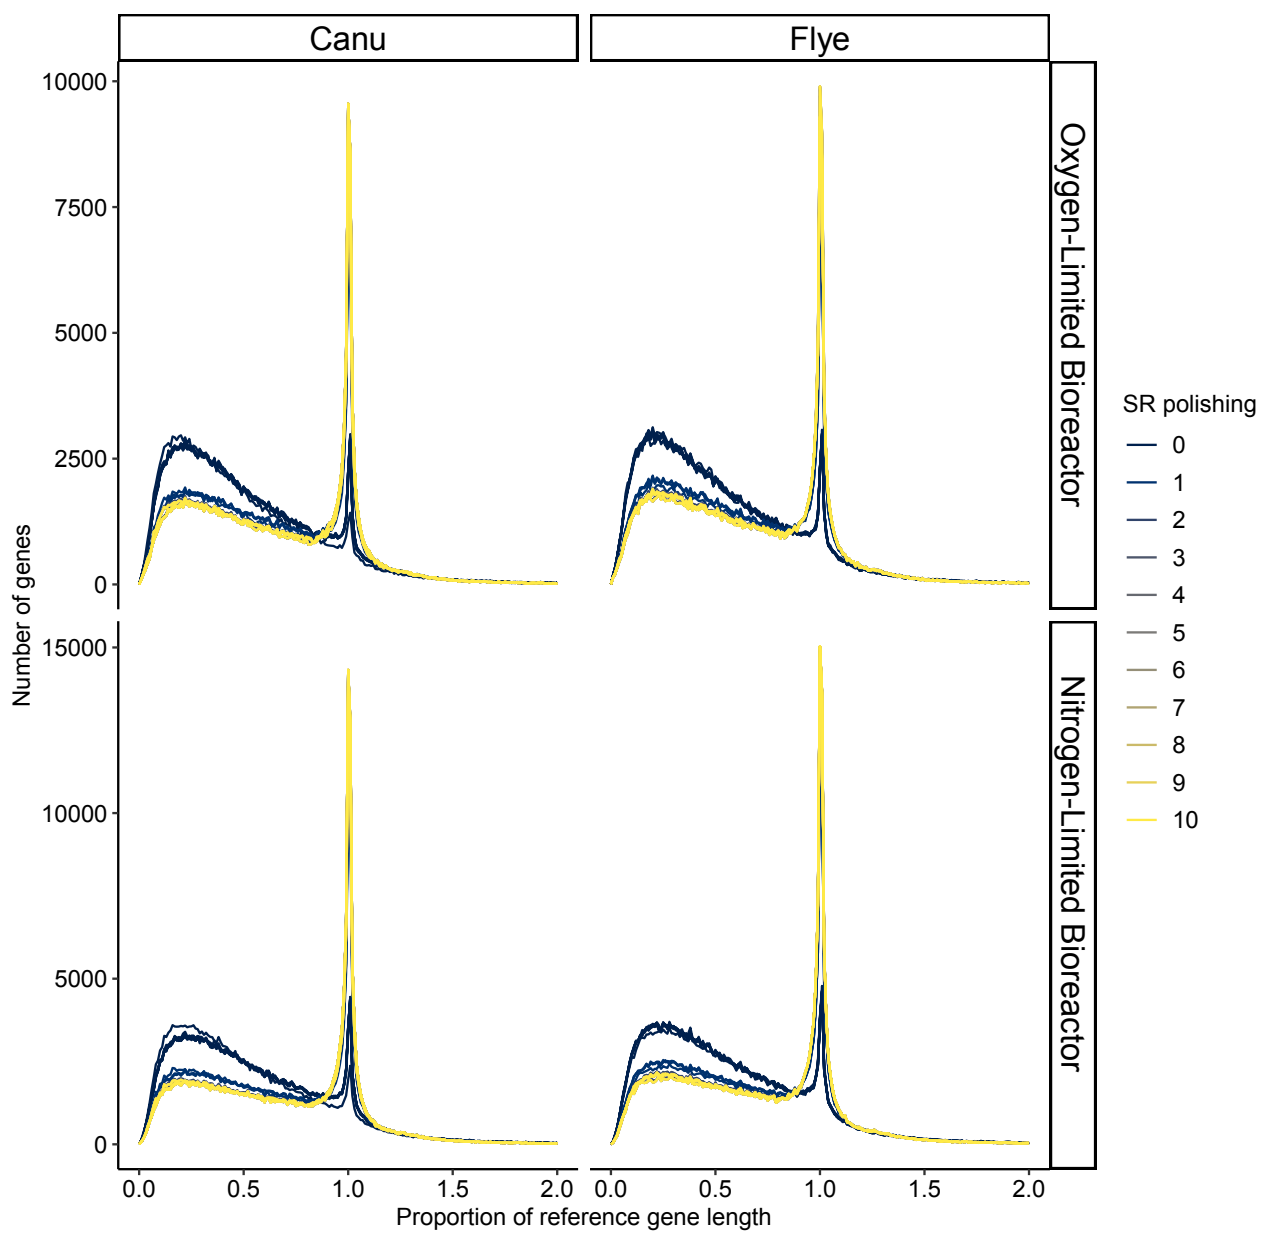

Supplement: Figure_S12.pdf [file Figure_S12.pdf]
