# Supplementary material for: Simple, reference-independent assessment to empirically guide correction and polishing of hybrid microbial community metagenomic assembly
Source: PeerJ. 2024 Nov 8;12:e18132. doi: 10.7717/peerj.18132 (PMC11552494; doi:10.7717/peerj.18132)
Supplement: Supplemental Information 1 — Spreadsheets for each analysis containing described and discussed statistics [file peerj-12-18132-s001.xlsx]

## Sheet: Dataset S1
This dataset is composed of several tables for evaluating assemblies. Each dataset has some shared and unique columns. The values of these columns are described here
Table	Column	Description
Inventory
	Assembly	name of assembly
	rctr	bioreactor of origin; AOR = Oxygen-Limited Bioreactor, NOR=Nitrogen-Limited Bioreactor
	asmblr	assembler (note that 'tryc', short for trycycler is not actually an assembler but a workflow)
	prog1	first program used to resolved long read assembly errors
	prog1round	iterations of the first program
	prog2	second program used to resolved long read assembly errors
	prog2round	iterations of the second program
	setting	assembly setting; def = default, meta = metagenome-optimized (note that while the setting is 'none' for assemblies with 'tryc' as the assembler, these were in fact run with metaG-optimized settings)
	pilround	iterations of short read polishing with pilon
	racround	iterations of long read correction with racon
	asmblr2	related to assembler, but replaces 'tryc' with 'sub[assembler]'
	setting2	related to setting, but expands on short read asemblers; MS = short read only, NP = long read only, NPMS, short-read first with long read scaffolding
	sample	the replicate of subsampling
MetaQUAST
	Assembly	name of assembly
	mquast_conttotal	count of assembled contigs
	mquast_cont50kb	count of assembled contigs greater than 50 kbps in length
	mquast_bpstotal	count of bps in assembled contigs
	mquast_bps50kb	count of bps in assembled contigs greater than 50 kbps in length
	mquast_longest	count of bps in longest assembled contig
	mquast_N50	N50 of assembled contigs
	mquast_L50	L50 of assembled contigs
	mquast_N90	N90 of assemlbed contigs
	mquast_L90	L90 of assembled contigs
	mquast_cont50kbprop	proportion of total contigs that were greater than 50 kbps in length
	mquast_bps50kbprop	proportion of bps in total contigs that were greater than 50 kbps in length
Circular contigs
	Assembly	Same as in the inventory spreadsheet
	asmblr	Same as in the inventory spreadsheet
	setting	Same as in the inventory spreadsheet
	sample	Same as in the inventory spreadsheet
	rctr	Same as in the inventory spreadsheet
	asmblr2	Same as in the inventory spreadsheet
	setting2	Same as in the inventory spreadsheet
	full_cont	full contig name
	contig	simple contig name
	gtdb_lineage_tophy	lineage, truncated to phylum, derived from GTDB-tk
	gtdb_dom	domain derived from GTDB-tk
	gtdb_phy	phylum derived from GTDB-tk
	checkm_lin	lineage used by CheckM's lineage_wf
	checkm_dbgenomes	genomes in the database for the lineage used by CheckM's lineage_wf
	checkm_dbmarkers	markers for lineage used by CheckM's lineage_wf
	checkm_dbmrkrsets	marker sets for the lineage used by CheckM's lineage_wf
	checkm_0copy	markers with 0 copies identified by CheckM's lineage_wf
	checkm_1copy	markers with 1 copies identified by CheckM's lineage_wf
	checkm_2copy	markers with 2 copies identified by CheckM's lineage_wf
	checkm_3copy	markers with 3 copies identified by CheckM's lineage_wf
	checkm_4copy	markers with 4 copies identified by CheckM's lineage_wf
	checkm_5copy	markers with 5 copies identified by CheckM's lineage_wf
	checkm_comp	completion estiamted by CheckM's lineage_wf
	checkm_cont	contamination estiamted by CheckM's lineage_wf
	checkm_strnhet	strain heterogeneity estiamted by CheckM's lineage_wf
	length	bps in circular contig
	circ_count	count of circular contigs PER ASSEMBLY
	circ_maxleng	bps in longest circular contigs PER ASSEMBLY
	circ_totlength	total bps in circular contigs PER ASSEMBLY
	circ_count_5kb	count of circular contigs greater than 5Kbp PER ASSEMBLY
	circ_count_1mb	count of circular contigs greater than 1Mbp PER ASSEMBLY
Long (>1Mbp) contigs
	Assembly	Same as in the inventory spreadsheet
	asmblr	Same as in the inventory spreadsheet
	setting	Same as in the inventory spreadsheet
	sample	Same as in the inventory spreadsheet
	rctr	Same as in the inventory spreadsheet
	asmblr2	Same as in the inventory spreadsheet
	setting2	Same as in the inventory spreadsheet
	full_cont	full contig name
	contig	simple contig name
	gtdb_lineage_tophy	lineage, truncated to phylum, derived from GTDB-tk
	gtdb_dom	domain derived from GTDB-tk
	gtdb_phy	phylum derived from GTDB-tk
	checkm_lin	lineage used by CheckM's lineage_wf
	checkm_dbgenomes	genomes in the database for the lineage used by CheckM's lineage_wf
	checkm_dbmarkers	markers for lineage used by CheckM's lineage_wf
	checkm_dbmrkrsets	marker sets for the lineage used by CheckM's lineage_wf
	checkm_0copy	markers with 0 copies identified by CheckM's lineage_wf
	checkm_1copy	markers with 1 copies identified by CheckM's lineage_wf
	checkm_2copy	markers with 2 copies identified by CheckM's lineage_wf
	checkm_3copy	markers with 3 copies identified by CheckM's lineage_wf
	checkm_4copy	markers with 4 copies identified by CheckM's lineage_wf
	checkm_5copy	markers with 5 copies identified by CheckM's lineage_wf
	checkm_comp	completion estiamted by CheckM's lineage_wf
	checkm_cont	contamination estiamted by CheckM's lineage_wf
	checkm_strnhet	strain heterogeneity estiamted by CheckM's lineage_wf
rpoB genes
	Assembly	Same as in the inventory spreadsheet
	rctr	Same as in the inventory spreadsheet
	asmblr	Same as in the inventory spreadsheet
	prog1	Same as in the inventory spreadsheet
	prog1round	Same as in the inventory spreadsheet
	prog2	Same as in the inventory spreadsheet
	prog2round	Same as in the inventory spreadsheet
	setting	Same as in the inventory spreadsheet
	pilround	Same as in the inventory spreadsheet
	racround	Same as in the inventory spreadsheet
	asmblr2	Same as in the inventory spreadsheet
	setting2	Same as in the inventory spreadsheet
	sample	Same as in the inventory spreadsheet
	contig	simple contig name
	Length	rpoB gene length
	gene	rpoB gene number in contig
	OLR_Ill_cov	Oxygen-Limited Bioreactor Illumina read depth of contig
	OLR_Ill_cov-var	Oxygen-Limited Bioreactor Illumina read depth variance of contig
	OLR_ONT_cov	Oxygen-Limited Bioreactor ONT read depth of contig
	OLR_ONT_cov-var	Oxygen-Limited Bioreactor ONT read depth variance of contig
	NLR_Ill_cov	Nitrogen-Limited Bioreactor Illumina read depth of contig
	NLR_Ill_cov-var	Nitrogen-Limited Bioreactor Illumina read depth variance of contig
	NLR_ONT_cov	Nitrogen-Limited Bioreactor ONT read depth of contig
	NLR_ONT_cov-var	Nitrogen-Limited Bioreactor ONT read depth variance of contig
Automated bins
	Assembly	Same as in the inventory spreadsheet
	rctr	Same as in the inventory spreadsheet
	asmblr	Same as in the inventory spreadsheet
	prog1	Same as in the inventory spreadsheet
	prog1round	Same as in the inventory spreadsheet
	prog2	Same as in the inventory spreadsheet
	prog2round	Same as in the inventory spreadsheet
	setting	Same as in the inventory spreadsheet
	pilround	Same as in the inventory spreadsheet
	racround	Same as in the inventory spreadsheet
	asmblr2	Same as in the inventory spreadsheet
	setting2	Same as in the inventory spreadsheet
	sample	Same as in the inventory spreadsheet
	bin	name of bin
	num_seqs	number of contigs in bin
	sum_len	total bps on contigs in bin
	min_len	minimum length in bps of contigs in bin
	avg_len	average length in bps of contigs in bin
	max_len	maximum length in bps of contigs in bin
	checkm_lin	lineage used by CheckM's lineage_wf
	checkm_dbgenomes	genomes in the database for the lineage used by CheckM's lineage_wf
	checkm_dbmarkers	markers for lineage used by CheckM's lineage_wf
	checkm_dbmrkrsets	marker sets for the lineage used by CheckM's lineage_wf
	checkm_0copy	markers with 0 copies identified by CheckM's lineage_wf
	checkm_1copy	markers with 1 copies identified by CheckM's lineage_wf
	checkm_2copy	markers with 2 copies identified by CheckM's lineage_wf
	checkm_3copy	markers with 3 copies identified by CheckM's lineage_wf
	checkm_4copy	markers with 4 copies identified by CheckM's lineage_wf
	checkm_5copy	markers with 5 copies identified by CheckM's lineage_wf
	checkm_comp	completion estiamted by CheckM's lineage_wf
	checkm_cont	contamination estiamted by CheckM's lineage_wf
	checkm_strnhet	strain heterogeneity estiamted by CheckM's lineage_wf
	Hqual	indicator of whether or not bin is high-quality
	Mqual	indicator of whether or not bin is medium-quality or better
Assembly-level CheckM
	Assembly	Same as in the inventory spreadsheet
	checkm_lin	checkm_lin
	checkm_dbgenomes	checkm_dbgenomes
	checkm_dbmarkers	checkm_dbmarkers
	checkm_dbmrkrsets	checkm_dbmrkrsets
	checkm_0copy	checkm_0copy
	checkm_1copy	checkm_1copy
	checkm_2copy	checkm_2copy
	checkm_3copy	checkm_3copy
	checkm_4copy	checkm_4copy
	checkm_5copy	checkm_5copy
	checkm_comp	checkm_comp
	checkm_cont	checkm_cont
	checkm_strnhet	checkm_strnhet
Prodigal
	Assembly	Same as in the inventory spreadsheet
	rctr	Same as in the inventory spreadsheet
	asmblr	Same as in the inventory spreadsheet
	setting	Same as in the inventory spreadsheet
	sample	Same as in the inventory spreadsheet
	prog1	Same as in the inventory spreadsheet
	prog1round	Same as in the inventory spreadsheet
	prog2	Same as in the inventory spreadsheet
	prog2round	Same as in the inventory spreadsheet
	pilround	Same as in the inventory spreadsheet
	racround	Same as in the inventory spreadsheet
	asm_count	number of contigs in assembly
	asm_leng	number of bps in assembly
	asmgenecount_sum	total number of genes in assembly
	asmgenelengsum_sum	total number of bps in genes in assembly
	asmgenecountpermb_min	minimum total number of genes in assembly normalized to contig length
	asmgenecountpermb_med	median total number of genes in assembly normalized to contig length
	asmgenecountpermb_men	mean total number of genes in assembly normalized to contig length
	asmgenecountpermb_max	maximum total number of genes in assembly normalized to contig length
	asmgenelengsumpermb_min	minimum total number of bps genes in assembly normalized to contig length
	asmgenelengsumpermb_med	median total number of bps genes in assembly normalized to contig length
	asmgenelengsumpermb_men	mean total number of bps genes in assembly normalized to contig length
	asmgenelengsumpermb_max	maximum total number of bps genes in assembly normalized to contig length
	asmgenecount_sum_prop	proportion of highest observed value during iterative processes of asmgenecount_sum
	asmgenelengsum_sum_prop	proportion of highest observed value during iterative processes of asmgenelengsum_sum
	asmgenecountpermb_min_prop	proportion of highest observed value during iterative processes of asmgenecountpermb_min
	asmgenecountpermb_med_prop	proportion of highest observed value during iterative processes of asmgenecountpermb_med
	asmgenecountpermb_men_prop	proportion of highest observed value during iterative processes of asmgenecountpermb_men
	asmgenecountpermb_max_prop	proportion of highest observed value during iterative processes of asmgenecountpermb_max
	asmgenelengsumpermb_min_prop	proportion of highest observed value during iterative processes of asmgenelengsumpermb_min
	asmgenelengsumpermb_med_prop	proportion of highest observed value during iterative processes of asmgenelengsumpermb_med
	asmgenelengsumpermb_men_prop	proportion of highest observed value during iterative processes of asmgenelengsumpermb_men
	asmgenelengsumpermb_max_prop	proportion of highest observed value during iterative processes of asmgenelengsumpermb_max
	subset	subset of assembly
	Mbpplus	indicator of whether or not subset was only contigs > 1 Mbp
	circ_10kb	indicator of whether or not subset was only circular contigs > 10 Kbp
	circ_500kb	indicator of whether or not subset was only circular contigs > 500 Kbp
	Mqual	indicator of whether or not subset was only contigs in medium-quality or better bins
	Hqual	indicator of whether or not subset was only contigs in high-quality bins
Assembly-level BUSCO
	Assembly	Same as in the inventory spreadsheet
	Busco_comp	Number of genes in BUSCO database found to be complete and present only once
	Busco_compdup	Number of genes in BUSCO database found to be complete and present more than once
	Busco_frag	Number of genes in BUSCO database found only fragmented
	Busco_miss	Number of genes in BUSCO database not found
	Busco_compsing	Difference between Busco_comp and Busco_compdup
IDEEL
	Assembly	Same as in the inventory spreadsheet
	rctr	Same as in the inventory spreadsheet
	asmblr	Same as in the inventory spreadsheet
	prog1	Same as in the inventory spreadsheet
	prog1round	Same as in the inventory spreadsheet
	prog2	Same as in the inventory spreadsheet
	prog2round	Same as in the inventory spreadsheet
	setting	Same as in the inventory spreadsheet
	pilround	Same as in the inventory spreadsheet
	racround	Same as in the inventory spreadsheet
	asmblr2	Same as in the inventory spreadsheet
	setting2	Same as in the inventory spreadsheet
	sample	Same as in the inventory spreadsheet
	lengprop	proportion of length relative to nearest reference
	count	number of genes in assembly
	countprop	proportion of genes in assembly
	subset	subset of assembly
BBMap
	Assembly	Same as in the inventory spreadsheet
	rctr	Same as in the inventory spreadsheet
	asmblr	Same as in the inventory spreadsheet
	setting	Same as in the inventory spreadsheet
	sample	Same as in the inventory spreadsheet
	prog1	Same as in the inventory spreadsheet
	prog1round	Same as in the inventory spreadsheet
	prog2	Same as in the inventory spreadsheet
	prog2round	Same as in the inventory spreadsheet
	pilround	Same as in the inventory spreadsheet
	racround	Same as in the inventory spreadsheet
	asm_count	number of contigs in assembly
	asm_leng	number of bps in assembly
	asmnoread_count	number of contigs in assembly that recruited 0 reads
	asmreads_min	minimum reads aligned to any contig in the assembly
	asmreads_med	median reads aligned to any contig in the assembly
	asmreads_men	mean reads aligned to any contig in the assembly
	asmreads_max	maximum reads aligned to any contig in the assembly
	asmreads_sum	total reads aligned to any contig in the assembly
	asmbps_min	minimum bps in reads aligned to any contig in the assembly
	asmbps_med	median bps in reads aligned to any contig in the assembly
	asmbps_men	mean bps in reads aligned to any contig in the assembly
	asmbps_max	maximum bps in reads aligned to any contig in the assembly
	asmbps_sum	total bps in reads aligned to any contig in the assembly
	asmambigreads_min	minimum reads aligned ambiguously to any contig in the assembly
	asmambigreads_med	median reads aligned ambiguously to any contig in the assembly
	asmambigreads_men	mean reads aligned ambiguously to any contig in the assembly
	asmambigreads_max	maximum reads aligned ambiguously to any contig in the assembly
	asmambigreads_sum	total reads aligned ambiguously to any contig in the assembly
	asmreadspermb_min	minimum reads aligned to any contig in the assembly normalizaed to contig length
	asmreadspermb_med	median reads aligned to any contig in the assembly normalizaed to contig length
	asmreadspermb_men	mean reads aligned to any contig in the assembly normalizaed to contig length
	asmreadspermb_max	maximum reads aligned to any contig in the assembly normalizaed to contig length
	asmreadspermb_sum	total reads aligned to any contig in the assembly normalizaed to contig length
	asmbpspermb_min	minimum bps in reads aligned to any contig in the assembly normalizaed to contig length
	asmbpspermb_med	median bps in reads aligned to any contig in the assembly normalizaed to contig length
	asmbpspermb_men	mean bps in reads aligned to any contig in the assembly normalizaed to contig length
	asmbpspermb_max	maximum bps in reads aligned to any contig in the assembly normalizaed to contig length
	asmbpspermb_sum	total bps in reads aligned to any contig in the assembly normalizaed to contig length
	asmnoread_count_frac	fraction of total contigs in assembly that recruited 0 reads
	asmreads_min_prop	proportion of highest observed value during iterative processes of asmreads_min
	asmreads_med_prop	proportion of highest observed value during iterative processes of asmreads_med_prop
	asmreads_men_prop	proportion of highest observed value during iterative processes of asmreads_men_prop
	asmreads_max_prop	proportion of highest observed value during iterative processes of asmreads_max_prop
	asmreads_sum_prop	proportion of highest observed value during iterative processes of asmreads_sum_prop
	asmbps_min_prop	proportion of highest observed value during iterative processes of asmbps_min
	asmbps_med_prop	proportion of highest observed value during iterative processes of asmbps_med
	asmbps_men_prop	proportion of highest observed value during iterative processes of asmbps_men
	asmbps_max_prop	proportion of highest observed value during iterative processes of asmbps_max
	asmbps_sum_prop	proportion of highest observed value during iterative processes of asmbps_sum
	asmambigreads_min_prop	proportion of highest observed value during iterative processes of asmambigreads_min
	asmambigreads_med_prop	proportion of highest observed value during iterative processes of asmambigreads_med
	asmambigreads_men_prop	proportion of highest observed value during iterative processes of asmambigreads_men
	asmambigreads_max_prop	proportion of highest observed value during iterative processes of asmambigreads_max
	asmambigreads_sum_prop	proportion of highest observed value during iterative processes of asmambigreads_sum
	asmreadspermb_min_prop	proportion of highest observed value during iterative processes of asmreadspermb_min
	asmreadspermb_med_prop	proportion of highest observed value during iterative processes of asmreadspermb_med
	asmreadspermb_men_prop	proportion of highest observed value during iterative processes of asmreadspermb_men
	asmreadspermb_max_prop	proportion of highest observed value during iterative processes of asmreadspermb_max
	asmreadspermb_sum_prop	proportion of highest observed value during iterative processes of asmreadspermb_sum
	asmbpspermb_min_prop	proportion of highest observed value during iterative processes of asmbpspermb_min
	asmbpspermb_med_prop	proportion of highest observed value during iterative processes of asmbpspermb_med
	asmbpspermb_men_prop	proportion of highest observed value during iterative processes of asmbpspermb_men
	asmbpspermb_max_prop	proportion of highest observed value during iterative processes of asmbpspermb_max
	asmbpspermb_sum_prop	proportion of highest observed value during iterative processes of asmbpspermb_sum
	subset	subset of assembly
	Mbpplus	indicator of whether or not subset was only contigs > 1 Mbp
	circ_10kb	indicator of whether or not subset was only circular contigs > 10 Kbp
	circ_500kb	indicator of whether or not subset was only circular contigs > 500 Kbp
	Mqual	indicator of whether or not subset was only contigs in medium-quality or better bins
	Hqual	indicator of whether or not subset was only contigs in high-quality bins
	reads_tot	total Illumina reads matched to bioreactor
	bps_tot	total bps in Illumina reads matched to bioreactor estimated as 1/2 of bps in total paired reads
	asmreads_proptot	proportion of total Illumina reads matched to bioreactor that aligned to assembly
	asmbps_proptot	proportion of total bps Illumina reads matched to bioreactor that aligned to assembly
ALE
	Assembly	Same as in the inventory spreadsheet
	rctr	Same as in the inventory spreadsheet
	asmblr	Same as in the inventory spreadsheet
	prog1	Same as in the inventory spreadsheet
	prog1round	Same as in the inventory spreadsheet
	prog2	Same as in the inventory spreadsheet
	prog2round	Same as in the inventory spreadsheet
	setting	Same as in the inventory spreadsheet
	pilround	Same as in the inventory spreadsheet
	racround	Same as in the inventory spreadsheet
	asmblr2	Same as in the inventory spreadsheet
	setting2	Same as in the inventory spreadsheet
	sample	Same as in the inventory spreadsheet
	subset	subset of assembly
	alescore	raw score output by ALE
	relale	score output by ALE relative to the first full assembly in the iterative processes
Pilon
	Assembly	Same as in the inventory spreadsheet
	rctr	Same as in the inventory spreadsheet
	asmblr	Same as in the inventory spreadsheet
	setting	Same as in the inventory spreadsheet
	sample	Same as in the inventory spreadsheet
	prog1	Same as in the inventory spreadsheet
	prog1round	Same as in the inventory spreadsheet
	prog2	Same as in the inventory spreadsheet
	prog2round	Same as in the inventory spreadsheet
	pilround	Same as in the inventory spreadsheet
	racround	Same as in the inventory spreadsheet
	chng_type	type of change
	asm_count	number of contigs in assembly
	asm_leng	number of bps in assembly
	asmnochng_count	number of contigs in assembly that were unchanged
	asmchng_min	minimum number of changes occuring on any contig in the assembly
	asmchng_med	median number of changes occuring on any contig in the assembly
	asmchng_men	mean number of changes occuring on any contig in the assembly
	asmchng_max	maximum number of changes occuring on any contig in the assembly
	asmchng_sum	total number of changes occuring on any contig in the assembly
	asmchngbps_min	minimum number of bps in changes occuring on any contig in the assembly
	asmchngbps_med	median number of bps in changes occuring on any contig in the assembly
	asmchngbps_men	mean number of bps in changes occuring on any contig in the assembly
	asmchngbps_max	maximum number of bps in changes occuring on any contig in the assembly
	asmchngbps_sum	total number of bps in changes occuring on any contig in the assembly
	asmchngcountpermb_min	minimum number of changes occuring on any contig in the assembly normalized to contig length
	asmchngcountpermb_med	median number of changes occuring on any contig in the assembly normalized to contig length
	asmchngcountpermb_men	mean number of changes occuring on any contig in the assembly normalized to contig length
	asmchngcountpermb_max	maximum number of changes occuring on any contig in the assembly normalized to contig length
	asmchngbpspermb_min	minimum number of bps in changes occuring on any contig in the assembly normalized to contig length
	asmchngbpspermb_med	median number of bps in changes occuring on any contig in the assembly normalized to contig length
	asmchngbpspermb_men	mean number of bps in changes occuring on any contig in the assembly normalized to contig length
	asmchngbpspermb_max	maximum number of bps in changes occuring on any contig in the assembly normalized to contig length
	asmnochng_frac	fraction of total contigs in assembly that were unchanged
	asmchng_min_prop	proportion of highest observed value during iterative processes of asmchng_min
	asmchng_med_prop	proportion of highest observed value during iterative processes of asmchng_med
	asmchng_men_prop	proportion of highest observed value during iterative processes of asmchng_men
	asmchng_max_prop	proportion of highest observed value during iterative processes of asmchng_max
	asmchng_sum_prop	proportion of highest observed value during iterative processes of asmchng_sum
	asmchngbps_min_prop	proportion of highest observed value during iterative processes of asmchngbps_min
	asmchngbps_med_prop	proportion of highest observed value during iterative processes of asmchngbps_med
	asmchngbps_men_prop	proportion of highest observed value during iterative processes of asmchngbps_men
	asmchngbps_max_prop	proportion of highest observed value during iterative processes of asmchngbps_max
	asmchngbps_sum_prop	proportion of highest observed value during iterative processes of asmchngbps_sum
	asmchngcountpermb_min_prop	proportion of highest observed value during iterative processes of asmchngcountpermb_min
	asmchngcountpermb_med_prop	proportion of highest observed value during iterative processes of asmchngcountpermb_med
	asmchngcountpermb_men_prop	proportion of highest observed value during iterative processes of asmchngcountpermb_men
	asmchngcountpermb_max_prop	proportion of highest observed value during iterative processes of asmchngcountpermb_max
	asmchngbpspermb_min_prop	proportion of highest observed value during iterative processes of asmchngbpspermb_min
	asmchngbpspermb_med_prop	proportion of highest observed value during iterative processes of asmchngbpspermb_med
	asmchngbpspermb_men_prop	proportion of highest observed value during iterative processes of asmchngbpspermb_men
	asmchngbpspermb_max_prop	proportion of highest observed value during iterative processes of asmchngbpspermb_max
	subset	subset of assembly
	Mbpplus	indicator of whether or not subset was only contigs > 1 Mbp
	circ_10kb	indicator of whether or not subset was only circular contigs > 10 Kbp
	circ_500kb	indicator of whether or not subset was only circular contigs > 500 Kbp
	Mqual	indicator of whether or not subset was only contigs in medium-quality or better bins
	Hqual	indicator of whether or not subset was only contigs in high-quality bins

## Sheet: Inventory
Assembly	rctr	asmblr	prog1	prog1round	prog2	prog2round	setting	pilround	racround	asmblr2	setting2	sample
AOR_canu	AOR	canu	none	NA	none	NA	meta	NA	NA	canu	meta	none
AOR_canu_def	AOR	canu	none	NA	none	NA	def	NA	NA	canu	def	none
AOR_canu_pil1	AOR	canu	pil	1	none	NA	meta	1	NA	canu	meta	none
AOR_canu_pil10	AOR	canu	pil	10	none	NA	meta	10	NA	canu	meta	none
AOR_canu_pil2	AOR	canu	pil	2	none	NA	meta	2	NA	canu	meta	none
AOR_canu_pil3	AOR	canu	pil	3	none	NA	meta	3	NA	canu	meta	none
AOR_canu_pil4	AOR	canu	pil	4	none	NA	meta	4	NA	canu	meta	none
AOR_canu_pil5	AOR	canu	pil	5	none	NA	meta	5	NA	canu	meta	none
AOR_canu_pil6	AOR	canu	pil	6	none	NA	meta	6	NA	canu	meta	none
AOR_canu_pil7	AOR	canu	pil	7	none	NA	meta	7	NA	canu	meta	none
AOR_canu_pil8	AOR	canu	pil	8	none	NA	meta	8	NA	canu	meta	none
AOR_canu_pil9	AOR	canu	pil	9	none	NA	meta	9	NA	canu	meta	none
AOR_canu_rac1	AOR	canu	rac	1	none	NA	meta	NA	1	canu	meta	none
AOR_canu_rac10	AOR	canu	rac	10	none	NA	meta	NA	10	canu	meta	none
AOR_canu_rac10_pil1	AOR	canu	rac	10	pil	1	meta	1	10	canu	meta	none
AOR_canu_rac10_pil10	AOR	canu	rac	10	pil	10	meta	10	10	canu	meta	none
AOR_canu_rac10_pil2	AOR	canu	rac	10	pil	2	meta	2	10	canu	meta	none
AOR_canu_rac10_pil3	AOR	canu	rac	10	pil	3	meta	3	10	canu	meta	none
AOR_canu_rac10_pil4	AOR	canu	rac	10	pil	4	meta	4	10	canu	meta	none
AOR_canu_rac10_pil5	AOR	canu	rac	10	pil	5	meta	5	10	canu	meta	none
AOR_canu_rac10_pil6	AOR	canu	rac	10	pil	6	meta	6	10	canu	meta	none
AOR_canu_rac10_pil7	AOR	canu	rac	10	pil	7	meta	7	10	canu	meta	none
AOR_canu_rac10_pil8	AOR	canu	rac	10	pil	8	meta	8	10	canu	meta	none
AOR_canu_rac10_pil9	AOR	canu	rac	10	pil	9	meta	9	10	canu	meta	none
AOR_canu_rac2	AOR	canu	rac	2	none	NA	meta	NA	2	canu	meta	none
AOR_canu_rac2_pil1	AOR	canu	rac	2	pil	1	meta	1	2	canu	meta	none
AOR_canu_rac2_pil10	AOR	canu	rac	2	pil	10	meta	10	2	canu	meta	none
AOR_canu_rac2_pil2	AOR	canu	rac	2	pil	2	meta	2	2	canu	meta	none
AOR_canu_rac2_pil3	AOR	canu	rac	2	pil	3	meta	3	2	canu	meta	none
AOR_canu_rac2_pil4	AOR	canu	rac	2	pil	4	meta	4	2	canu	meta	none
AOR_canu_rac2_pil5	AOR	canu	rac	2	pil	5	meta	5	2	canu	meta	none
AOR_canu_rac2_pil6	AOR	canu	rac	2	pil	6	meta	6	2	canu	meta	none
AOR_canu_rac2_pil7	AOR	canu	rac	2	pil	7	meta	7	2	canu	meta	none
AOR_canu_rac2_pil8	AOR	canu	rac	2	pil	8	meta	8	2	canu	meta	none
AOR_canu_rac2_pil9	AOR	canu	rac	2	pil	9	meta	9	2	canu	meta	none
AOR_canu_rac3	AOR	canu	rac	3	none	NA	meta	NA	3	canu	meta	none
AOR_canu_rac4	AOR	canu	rac	4	none	NA	meta	NA	4	canu	meta	none
AOR_canu_rac5	AOR	canu	rac	5	none	NA	meta	NA	5	canu	meta	none
AOR_canu_rac5_pil1	AOR	canu	rac	5	pil	1	meta	1	5	canu	meta	none
AOR_canu_rac5_pil10	AOR	canu	rac	5	pil	10	meta	10	5	canu	meta	none
AOR_canu_rac5_pil2	AOR	canu	rac	5	pil	2	meta	2	5	canu	meta	none
AOR_canu_rac5_pil3	AOR	canu	rac	5	pil	3	meta	3	5	canu	meta	none
AOR_canu_rac5_pil4	AOR	canu	rac	5	pil	4	meta	4	5	canu	meta	none
AOR_canu_rac5_pil5	AOR	canu	rac	5	pil	5	meta	5	5	canu	meta	none
AOR_canu_rac5_pil6	AOR	canu	rac	5	pil	6	meta	6	5	canu	meta	none
AOR_canu_rac5_pil7	AOR	canu	rac	5	pil	7	meta	7	5	canu	meta	none
AOR_canu_rac5_pil8	AOR	canu	rac	5	pil	8	meta	8	5	canu	meta	none
AOR_canu_rac5_pil9	AOR	canu	rac	5	pil	9	meta	9	5	canu	meta	none
AOR_canu_rac6	AOR	canu	rac	6	none	NA	meta	NA	6	canu	meta	none
AOR_canu_rac7	AOR	canu	rac	7	none	NA	meta	NA	7	canu	meta	none
AOR_canu_rac8	AOR	canu	rac	8	none	NA	meta	NA	8	canu	meta	none
AOR_canu_rac9	AOR	canu	rac	9	none	NA	meta	NA	9	canu	meta	none
AOR_flye	AOR	flye	none	NA	none	NA	meta	NA	NA	flye	meta	none
AOR_flye_def	AOR	flye	none	NA	none	NA	def	NA	NA	flye	def	none
AOR_flye_pil1	AOR	flye	pil	1	none	NA	meta	1	NA	flye	meta	none
AOR_flye_pil10	AOR	flye	pil	10	none	NA	meta	10	NA	flye	meta	none
AOR_flye_pil2	AOR	flye	pil	2	none	NA	meta	2	NA	flye	meta	none
AOR_flye_pil3	AOR	flye	pil	3	none	NA	meta	3	NA	flye	meta	none
AOR_flye_pil4	AOR	flye	pil	4	none	NA	meta	4	NA	flye	meta	none
AOR_flye_pil5	AOR	flye	pil	5	none	NA	meta	5	NA	flye	meta	none
AOR_flye_pil6	AOR	flye	pil	6	none	NA	meta	6	NA	flye	meta	none
AOR_flye_pil7	AOR	flye	pil	7	none	NA	meta	7	NA	flye	meta	none
AOR_flye_pil8	AOR	flye	pil	8	none	NA	meta	8	NA	flye	meta	none
AOR_flye_pil9	AOR	flye	pil	9	none	NA	meta	9	NA	flye	meta	none
AOR_flye_rac1	AOR	flye	rac	1	none	NA	meta	NA	1	flye	meta	none
AOR_flye_rac10	AOR	flye	rac	10	none	NA	meta	NA	10	flye	meta	none
AOR_flye_rac10_pil1	AOR	flye	rac	10	pil	1	meta	1	10	flye	meta	none
AOR_flye_rac10_pil10	AOR	flye	rac	10	pil	10	meta	10	10	flye	meta	none
AOR_flye_rac10_pil2	AOR	flye	rac	10	pil	2	meta	2	10	flye	meta	none
AOR_flye_rac10_pil3	AOR	flye	rac	10	pil	3	meta	3	10	flye	meta	none
AOR_flye_rac10_pil4	AOR	flye	rac	10	pil	4	meta	4	10	flye	meta	none
AOR_flye_rac10_pil5	AOR	flye	rac	10	pil	5	meta	5	10	flye	meta	none
AOR_flye_rac10_pil6	AOR	flye	rac	10	pil	6	meta	6	10	flye	meta	none
AOR_flye_rac10_pil7	AOR	flye	rac	10	pil	7	meta	7	10	flye	meta	none
AOR_flye_rac10_pil8	AOR	flye	rac	10	pil	8	meta	8	10	flye	meta	none
AOR_flye_rac10_pil9	AOR	flye	rac	10	pil	9	meta	9	10	flye	meta	none
AOR_flye_rac2	AOR	flye	rac	2	none	NA	meta	NA	2	flye	meta	none
AOR_flye_rac2_pil1	AOR	flye	rac	2	pil	1	meta	1	2	flye	meta	none
AOR_flye_rac2_pil10	AOR	flye	rac	2	pil	10	meta	10	2	flye	meta	none
AOR_flye_rac2_pil2	AOR	flye	rac	2	pil	2	meta	2	2	flye	meta	none
AOR_flye_rac2_pil3	AOR	flye	rac	2	pil	3	meta	3	2	flye	meta	none
AOR_flye_rac2_pil4	AOR	flye	rac	2	pil	4	meta	4	2	flye	meta	none
AOR_flye_rac2_pil5	AOR	flye	rac	2	pil	5	meta	5	2	flye	meta	none
AOR_flye_rac2_pil6	AOR	flye	rac	2	pil	6	meta	6	2	flye	meta	none
AOR_flye_rac2_pil7	AOR	flye	rac	2	pil	7	meta	7	2	flye	meta	none
AOR_flye_rac2_pil8	AOR	flye	rac	2	pil	8	meta	8	2	flye	meta	none
AOR_flye_rac2_pil9	AOR	flye	rac	2	pil	9	meta	9	2	flye	meta	none
AOR_flye_rac3	AOR	flye	rac	3	none	NA	meta	NA	3	flye	meta	none
AOR_flye_rac4	AOR	flye	rac	4	none	NA	meta	NA	4	flye	meta	none
AOR_flye_rac5	AOR	flye	rac	5	none	NA	meta	NA	5	flye	meta	none
AOR_flye_rac5_pil1	AOR	flye	rac	5	pil	1	meta	1	5	flye	meta	none
AOR_flye_rac5_pil10	AOR	flye	rac	5	pil	10	meta	10	5	flye	meta	none
AOR_flye_rac5_pil2	AOR	flye	rac	5	pil	2	meta	2	5	flye	meta	none
AOR_flye_rac5_pil3	AOR	flye	rac	5	pil	3	meta	3	5	flye	meta	none
AOR_flye_rac5_pil4	AOR	flye	rac	5	pil	4	meta	4	5	flye	meta	none
AOR_flye_rac5_pil5	AOR	flye	rac	5	pil	5	meta	5	5	flye	meta	none
AOR_flye_rac5_pil6	AOR	flye	rac	5	pil	6	meta	6	5	flye	meta	none
AOR_flye_rac5_pil7	AOR	flye	rac	5	pil	7	meta	7	5	flye	meta	none
AOR_flye_rac5_pil8	AOR	flye	rac	5	pil	8	meta	8	5	flye	meta	none
AOR_flye_rac5_pil9	AOR	flye	rac	5	pil	9	meta	9	5	flye	meta	none
AOR_flye_rac6	AOR	flye	rac	6	none	NA	meta	NA	6	flye	meta	none
AOR_flye_rac7	AOR	flye	rac	7	none	NA	meta	NA	7	flye	meta	none
AOR_flye_rac8	AOR	flye	rac	8	none	NA	meta	NA	8	flye	meta	none
AOR_flye_rac9	AOR	flye	rac	9	none	NA	meta	NA	9	flye	meta	none
AOR_opra_NPMS	AOR	opra	none	NA	none	NA	NPMS	NA	NA	opra	NPMS	none
AOR_spds_MS	AOR	spds	none	NA	none	NA	MS	NA	NA	spds	MS	none
AOR_spds_NPMS	AOR	spds	none	NA	none	NA	NPMS	NA	NA	spds	NPMS	none
AOR_Tryc_subcanu_sample01	AOR	tryc	none	NA	none	NA	subcanu	NA	NA	canu	sub	sample01
AOR_Tryc_subcanu_sample02	AOR	tryc	none	NA	none	NA	subcanu	NA	NA	canu	sub	sample02
AOR_Tryc_subcanu_sample03	AOR	tryc	none	NA	none	NA	subcanu	NA	NA	canu	sub	sample03
AOR_Tryc_subcanu_sample04	AOR	tryc	none	NA	none	NA	subcanu	NA	NA	canu	sub	sample04
AOR_Tryc_subcanu_sample05	AOR	tryc	none	NA	none	NA	subcanu	NA	NA	canu	sub	sample05
AOR_Tryc_subcanu_sample06	AOR	tryc	none	NA	none	NA	subcanu	NA	NA	canu	sub	sample06
AOR_Tryc_subcanu_sample07	AOR	tryc	none	NA	none	NA	subcanu	NA	NA	canu	sub	sample07
AOR_Tryc_subcanu_sample08	AOR	tryc	none	NA	none	NA	subcanu	NA	NA	canu	sub	sample08
AOR_Tryc_subcanu_sample09	AOR	tryc	none	NA	none	NA	subcanu	NA	NA	canu	sub	sample09
AOR_Tryc_subcanu_sample11	AOR	tryc	none	NA	none	NA	subcanu	NA	NA	canu	sub	sample11
AOR_Tryc_subcanu_sample12	AOR	tryc	none	NA	none	NA	subcanu	NA	NA	canu	sub	sample12
AOR_Tryc_subflye_sample01	AOR	tryc	none	NA	none	NA	subflye	NA	NA	flye	sub	sample01
AOR_Tryc_subflye_sample02	AOR	tryc	none	NA	none	NA	subflye	NA	NA	flye	sub	sample02
AOR_Tryc_subflye_sample03	AOR	tryc	none	NA	none	NA	subflye	NA	NA	flye	sub	sample03
AOR_Tryc_subflye_sample04	AOR	tryc	none	NA	none	NA	subflye	NA	NA	flye	sub	sample04
AOR_Tryc_subflye_sample05	AOR	tryc	none	NA	none	NA	subflye	NA	NA	flye	sub	sample05
AOR_Tryc_subflye_sample06	AOR	tryc	none	NA	none	NA	subflye	NA	NA	flye	sub	sample06
AOR_Tryc_subflye_sample07	AOR	tryc	none	NA	none	NA	subflye	NA	NA	flye	sub	sample07
AOR_Tryc_subflye_sample08	AOR	tryc	none	NA	none	NA	subflye	NA	NA	flye	sub	sample08
AOR_Tryc_subflye_sample09	AOR	tryc	none	NA	none	NA	subflye	NA	NA	flye	sub	sample09
AOR_Tryc_subflye_sample10	AOR	tryc	none	NA	none	NA	subflye	NA	NA	flye	sub	sample10
AOR_Tryc_subflye_sample11	AOR	tryc	none	NA	none	NA	subflye	NA	NA	flye	sub	sample11
AOR_Tryc_subflye_sample12	AOR	tryc	none	NA	none	NA	subflye	NA	NA	flye	sub	sample12
AOR_unic_MS	AOR	unic	none	NA	none	NA	MS	NA	NA	unic	MS	none
AOR_unic_NP	AOR	unic	none	NA	none	NA	NP	NA	NA	unic	NP	none
AOR_unic_NPMS	AOR	unic	none	NA	none	NA	NPMS	NA	NA	unic	NPMS	none
NOR_canu	NOR	canu	none	NA	none	NA	meta	NA	NA	canu	meta	none
NOR_canu_def	NOR	canu	none	NA	none	NA	def	NA	NA	canu	def	none
NOR_canu_pil1	NOR	canu	pil	1	none	NA	meta	1	NA	canu	meta	none
NOR_canu_pil10	NOR	canu	pil	10	none	NA	meta	10	NA	canu	meta	none
NOR_canu_pil2	NOR	canu	pil	2	none	NA	meta	2	NA	canu	meta	none
NOR_canu_pil3	NOR	canu	pil	3	none	NA	meta	3	NA	canu	meta	none
NOR_canu_pil4	NOR	canu	pil	4	none	NA	meta	4	NA	canu	meta	none
NOR_canu_pil5	NOR	canu	pil	5	none	NA	meta	5	NA	canu	meta	none
NOR_canu_pil6	NOR	canu	pil	6	none	NA	meta	6	NA	canu	meta	none
NOR_canu_pil7	NOR	canu	pil	7	none	NA	meta	7	NA	canu	meta	none
NOR_canu_pil8	NOR	canu	pil	8	none	NA	meta	8	NA	canu	meta	none
NOR_canu_pil9	NOR	canu	pil	9	none	NA	meta	9	NA	canu	meta	none
NOR_canu_rac1	NOR	canu	rac	1	none	NA	meta	NA	1	canu	meta	none
NOR_canu_rac10	NOR	canu	rac	10	none	NA	meta	NA	10	canu	meta	none
NOR_canu_rac10_pil1	NOR	canu	rac	10	pil	1	meta	1	10	canu	meta	none
NOR_canu_rac10_pil10	NOR	canu	rac	10	pil	10	meta	10	10	canu	meta	none
NOR_canu_rac10_pil2	NOR	canu	rac	10	pil	2	meta	2	10	canu	meta	none
NOR_canu_rac10_pil3	NOR	canu	rac	10	pil	3	meta	3	10	canu	meta	none
NOR_canu_rac10_pil4	NOR	canu	rac	10	pil	4	meta	4	10	canu	meta	none
NOR_canu_rac10_pil5	NOR	canu	rac	10	pil	5	meta	5	10	canu	meta	none
NOR_canu_rac10_pil6	NOR	canu	rac	10	pil	6	meta	6	10	canu	meta	none
NOR_canu_rac10_pil7	NOR	canu	rac	10	pil	7	meta	7	10	canu	meta	none
NOR_canu_rac10_pil8	NOR	canu	rac	10	pil	8	meta	8	10	canu	meta	none
NOR_canu_rac10_pil9	NOR	canu	rac	10	pil	9	meta	9	10	canu	meta	none
NOR_canu_rac2	NOR	canu	rac	2	none	NA	meta	NA	2	canu	meta	none
NOR_canu_rac2_pil1	NOR	canu	rac	2	pil	1	meta	1	2	canu	meta	none
NOR_canu_rac2_pil10	NOR	canu	rac	2	pil	10	meta	10	2	canu	meta	none
NOR_canu_rac2_pil2	NOR	canu	rac	2	pil	2	meta	2	2	canu	meta	none
NOR_canu_rac2_pil3	NOR	canu	rac	2	pil	3	meta	3	2	canu	meta	none
NOR_canu_rac2_pil4	NOR	canu	rac	2	pil	4	meta	4	2	canu	meta	none
NOR_canu_rac2_pil5	NOR	canu	rac	2	pil	5	meta	5	2	canu	meta	none
NOR_canu_rac2_pil6	NOR	canu	rac	2	pil	6	meta	6	2	canu	meta	none
NOR_canu_rac2_pil7	NOR	canu	rac	2	pil	7	meta	7	2	canu	meta	none
NOR_canu_rac2_pil8	NOR	canu	rac	2	pil	8	meta	8	2	canu	meta	none
NOR_canu_rac2_pil9	NOR	canu	rac	2	pil	9	meta	9	2	canu	meta	none
NOR_canu_rac3	NOR	canu	rac	3	none	NA	meta	NA	3	canu	meta	none
NOR_canu_rac4	NOR	canu	rac	4	none	NA	meta	NA	4	canu	meta	none
NOR_canu_rac5	NOR	canu	rac	5	none	NA	meta	NA	5	canu	meta	none
NOR_canu_rac5_pil1	NOR	canu	rac	5	pil	1	meta	1	5	canu	meta	none
NOR_canu_rac5_pil10	NOR	canu	rac	5	pil	10	meta	10	5	canu	meta	none
NOR_canu_rac5_pil2	NOR	canu	rac	5	pil	2	meta	2	5	canu	meta	none
NOR_canu_rac5_pil3	NOR	canu	rac	5	pil	3	meta	3	5	canu	meta	none
NOR_canu_rac5_pil4	NOR	canu	rac	5	pil	4	meta	4	5	canu	meta	none
NOR_canu_rac5_pil5	NOR	canu	rac	5	pil	5	meta	5	5	canu	meta	none
NOR_canu_rac5_pil6	NOR	canu	rac	5	pil	6	meta	6	5	canu	meta	none
NOR_canu_rac5_pil7	NOR	canu	rac	5	pil	7	meta	7	5	canu	meta	none
NOR_canu_rac5_pil8	NOR	canu	rac	5	pil	8	meta	8	5	canu	meta	none
NOR_canu_rac5_pil9	NOR	canu	rac	5	pil	9	meta	9	5	canu	meta	none
NOR_canu_rac6	NOR	canu	rac	6	none	NA	meta	NA	6	canu	meta	none
NOR_canu_rac7	NOR	canu	rac	7	none	NA	meta	NA	7	canu	meta	none
NOR_canu_rac8	NOR	canu	rac	8	none	NA	meta	NA	8	canu	meta	none
NOR_canu_rac9	NOR	canu	rac	9	none	NA	meta	NA	9	canu	meta	none
NOR_flye	NOR	flye	none	NA	none	NA	meta	NA	NA	flye	meta	none
NOR_flye_def	NOR	flye	none	NA	none	NA	def	NA	NA	flye	def	none
NOR_flye_pil1	NOR	flye	pil	1	none	NA	meta	1	NA	flye	meta	none
NOR_flye_pil10	NOR	flye	pil	10	none	NA	meta	10	NA	flye	meta	none
NOR_flye_pil2	NOR	flye	pil	2	none	NA	meta	2	NA	flye	meta	none
NOR_flye_pil3	NOR	flye	pil	3	none	NA	meta	3	NA	flye	meta	none
NOR_flye_pil4	NOR	flye	pil	4	none	NA	meta	4	NA	flye	meta	none
NOR_flye_pil5	NOR	flye	pil	5	none	NA	meta	5	NA	flye	meta	none
NOR_flye_pil6	NOR	flye	pil	6	none	NA	meta	6	NA	flye	meta	none
NOR_flye_pil7	NOR	flye	pil	7	none	NA	meta	7	NA	flye	meta	none
NOR_flye_pil8	NOR	flye	pil	8	none	NA	meta	8	NA	flye	meta	none
NOR_flye_pil9	NOR	flye	pil	9	none	NA	meta	9	NA	flye	meta	none
NOR_flye_rac1	NOR	flye	rac	1	none	NA	meta	NA	1	flye	meta	none
NOR_flye_rac10	NOR	flye	rac	10	none	NA	meta	NA	10	flye	meta	none
NOR_flye_rac10_pil1	NOR	flye	rac	10	pil	1	meta	1	10	flye	meta	none
NOR_flye_rac10_pil10	NOR	flye	rac	10	pil	10	meta	10	10	flye	meta	none
NOR_flye_rac10_pil2	NOR	flye	rac	10	pil	2	meta	2	10	flye	meta	none
NOR_flye_rac10_pil3	NOR	flye	rac	10	pil	3	meta	3	10	flye	meta	none
NOR_flye_rac10_pil4	NOR	flye	rac	10	pil	4	meta	4	10	flye	meta	none
NOR_flye_rac10_pil5	NOR	flye	rac	10	pil	5	meta	5	10	flye	meta	none
NOR_flye_rac10_pil6	NOR	flye	rac	10	pil	6	meta	6	10	flye	meta	none
NOR_flye_rac10_pil7	NOR	flye	rac	10	pil	7	meta	7	10	flye	meta	none
NOR_flye_rac10_pil8	NOR	flye	rac	10	pil	8	meta	8	10	flye	meta	none
NOR_flye_rac10_pil9	NOR	flye	rac	10	pil	9	meta	9	10	flye	meta	none
NOR_flye_rac2	NOR	flye	rac	2	none	NA	meta	NA	2	flye	meta	none
NOR_flye_rac2_pil1	NOR	flye	rac	2	pil	1	meta	1	2	flye	meta	none
NOR_flye_rac2_pil10	NOR	flye	rac	2	pil	10	meta	10	2	flye	meta	none
NOR_flye_rac2_pil2	NOR	flye	rac	2	pil	2	meta	2	2	flye	meta	none
NOR_flye_rac2_pil3	NOR	flye	rac	2	pil	3	meta	3	2	flye	meta	none
NOR_flye_rac2_pil4	NOR	flye	rac	2	pil	4	meta	4	2	flye	meta	none
NOR_flye_rac2_pil5	NOR	flye	rac	2	pil	5	meta	5	2	flye	meta	none
NOR_flye_rac2_pil6	NOR	flye	rac	2	pil	6	meta	6	2	flye	meta	none
NOR_flye_rac2_pil7	NOR	flye	rac	2	pil	7	meta	7	2	flye	meta	none
NOR_flye_rac2_pil8	NOR	flye	rac	2	pil	8	meta	8	2	flye	meta	none
NOR_flye_rac2_pil9	NOR	flye	rac	2	pil	9	meta	9	2	flye	meta	none
NOR_flye_rac3	NOR	flye	rac	3	none	NA	meta	NA	3	flye	meta	none
NOR_flye_rac4	NOR	flye	rac	4	none	NA	meta	NA	4	flye	meta	none
NOR_flye_rac5	NOR	flye	rac	5	none	NA	meta	NA	5	flye	meta	none
NOR_flye_rac5_pil1	NOR	flye	rac	5	pil	1	meta	1	5	flye	meta	none
NOR_flye_rac5_pil10	NOR	flye	rac	5	pil	10	meta	10	5	flye	meta	none
NOR_flye_rac5_pil2	NOR	flye	rac	5	pil	2	meta	2	5	flye	meta	none
NOR_flye_rac5_pil3	NOR	flye	rac	5	pil	3	meta	3	5	flye	meta	none
NOR_flye_rac5_pil4	NOR	flye	rac	5	pil	4	meta	4	5	flye	meta	none
NOR_flye_rac5_pil5	NOR	flye	rac	5	pil	5	meta	5	5	flye	meta	none
NOR_flye_rac5_pil6	NOR	flye	rac	5	pil	6	meta	6	5	flye	meta	none
NOR_flye_rac5_pil7	NOR	flye	rac	5	pil	7	meta	7	5	flye	meta	none
NOR_flye_rac5_pil8	NOR	flye	rac	5	pil	8	meta	8	5	flye	meta	none
NOR_flye_rac5_pil9	NOR	flye	rac	5	pil	9	meta	9	5	flye	meta	none
NOR_flye_rac6	NOR	flye	rac	6	none	NA	meta	NA	6	flye	meta	none
NOR_flye_rac7	NOR	flye	rac	7	none	NA	meta	NA	7	flye	meta	none
NOR_flye_rac8	NOR	flye	rac	8	none	NA	meta	NA	8	flye	meta	none
NOR_flye_rac9	NOR	flye	rac	9	none	NA	meta	NA	9	flye	meta	none
NOR_opra_NPMS	NOR	opra	none	NA	none	NA	NPMS	NA	NA	opra	NPMS	none
NOR_spds_MS	NOR	spds	none	NA	none	NA	MS	NA	NA	spds	MS	none
NOR_spds_NPMS	NOR	spds	none	NA	none	NA	NPMS	NA	NA	spds	NPMS	none
NOR_Tryc_subcanu_sample01	NOR	tryc	none	NA	none	NA	subcanu	NA	NA	canu	sub	sample01
NOR_Tryc_subcanu_sample02	NOR	tryc	none	NA	none	NA	subcanu	NA	NA	canu	sub	sample02
NOR_Tryc_subcanu_sample03	NOR	tryc	none	NA	none	NA	subcanu	NA	NA	canu	sub	sample03
NOR_Tryc_subcanu_sample04	NOR	tryc	none	NA	none	NA	subcanu	NA	NA	canu	sub	sample04
NOR_Tryc_subcanu_sample05	NOR	tryc	none	NA	none	NA	subcanu	NA	NA	canu	sub	sample05
NOR_Tryc_subcanu_sample06	NOR	tryc	none	NA	none	NA	subcanu	NA	NA	canu	sub	sample06
NOR_Tryc_subcanu_sample07	NOR	tryc	none	NA	none	NA	subcanu	NA	NA	canu	sub	sample07
NOR_Tryc_subcanu_sample08	NOR	tryc	none	NA	none	NA	subcanu	NA	NA	canu	sub	sample08
NOR_Tryc_subcanu_sample09	NOR	tryc	none	NA	none	NA	subcanu	NA	NA	canu	sub	sample09
NOR_Tryc_subcanu_sample10	NOR	tryc	none	NA	none	NA	subcanu	NA	NA	canu	sub	sample10
NOR_Tryc_subcanu_sample11	NOR	tryc	none	NA	none	NA	subcanu	NA	NA	canu	sub	sample11
NOR_Tryc_subcanu_sample12	NOR	tryc	none	NA	none	NA	subcanu	NA	NA	canu	sub	sample12
NOR_Tryc_subflye_sample01	NOR	tryc	none	NA	none	NA	subflye	NA	NA	flye	sub	sample01
NOR_Tryc_subflye_sample02	NOR	tryc	none	NA	none	NA	subflye	NA	NA	flye	sub	sample02
NOR_Tryc_subflye_sample03	NOR	tryc	none	NA	none	NA	subflye	NA	NA	flye	sub	sample03
NOR_Tryc_subflye_sample04	NOR	tryc	none	NA	none	NA	subflye	NA	NA	flye	sub	sample04
NOR_Tryc_subflye_sample05	NOR	tryc	none	NA	none	NA	subflye	NA	NA	flye	sub	sample05
NOR_Tryc_subflye_sample06	NOR	tryc	none	NA	none	NA	subflye	NA	NA	flye	sub	sample06
NOR_Tryc_subflye_sample07	NOR	tryc	none	NA	none	NA	subflye	NA	NA	flye	sub	sample07
NOR_Tryc_subflye_sample08	NOR	tryc	none	NA	none	NA	subflye	NA	NA	flye	sub	sample08
NOR_Tryc_subflye_sample09	NOR	tryc	none	NA	none	NA	subflye	NA	NA	flye	sub	sample09
NOR_Tryc_subflye_sample10	NOR	tryc	none	NA	none	NA	subflye	NA	NA	flye	sub	sample10
NOR_Tryc_subflye_sample11	NOR	tryc	none	NA	none	NA	subflye	NA	NA	flye	sub	sample11
NOR_Tryc_subflye_sample12	NOR	tryc	none	NA	none	NA	subflye	NA	NA	flye	sub	sample12
NOR_unic_MS	NOR	unic	none	NA	none	NA	MS	NA	NA	unic	MS	none
NOR_unic_NP	NOR	unic	none	NA	none	NA	NP	NA	NA	unic	NP	none
NOR_unic_NPMS	NOR	unic	none	NA	none	NA	NPMS	NA	NA	unic	NPMS	none

## Sheet: MetaQUAST
Assembly	mquast_conttotal	mquast_cont50kb	mquast_bpstotal	mquast_bps50kb	mquast_longest	mquast_N50	mquast_L50	mquast_N90	mquast_L90	mquast_cont50kbprop	mquast_bps50kbprop
AOR_canu	4187	541	162226766	106304008	4974291	110291	188	13064	2091	0.12920945784571292	0.6552803253194359
AOR_canu_def	3179	381	87229286	45289285	881299	53975	349	10393	1884	0.11984900912236553	0.5191981624153155
AOR_canu_pil1	4187	543	162414590	106619228	5025560	111235	187	13064	2088	0.12968712682111297	0.6564633632975954
AOR_canu_pil10	4187	540	162138663	106293464	5005254	110754	188	13061	2089	0.1289706233580129	0.6555713611626365
AOR_canu_pil2	4187	542	162303557	106506738	5006668	111235	187	13059	2089	0.12944829233341296	0.6562193704725768
AOR_canu_pil3	4187	542	162206273	106426959	5006691	110720	188	13059	2089	0.12944829233341296	0.6561211045148667
AOR_canu_pil4	4187	540	162158620	106314463	5006698	111235	187	13059	2089	0.1289706233580129	0.6556201760967132
AOR_canu_pil5	4187	540	162156047	106313229	5006698	111235	187	13061	2089	0.1289706233580129	0.6556229691514371
AOR_canu_pil6	4187	540	162142813	106299797	5005254	111235	187	13061	2089	0.1289706233580129	0.6555936401572113
AOR_canu_pil7	4187	540	162142770	106298762	5005254	111235	187	13061	2089	0.1289706233580129	0.6555874307562403
AOR_canu_pil8	4187	540	162137911	106293284	5005254	110754	188	13061	2089	0.1289706233580129	0.6555732915542498
AOR_canu_pil9	4187	540	162138316	106293342	5005254	110754	188	13061	2089	0.1289706233580129	0.6555720117384222
AOR_canu_rac1	4187	548	163482803	107375673	5011638	111109	189	13192	2094	0.1308812992596131	0.6568010275674072
AOR_canu_rac10	4178	547	163252651	107352914	5018396	111282	188	13207	2083	0.13092388702728577	0.6575875695886861
AOR_canu_rac10_pil1	4178	548	163168905	107346878	5033599	111307	188	13204	2083	0.13116323599808521	0.6578880822911694
AOR_canu_rac10_pil10	4178	548	162987271	107237608	5016878	111352	188	13200	2084	0.13116323599808521	0.6579508162941141
AOR_canu_rac10_pil2	4178	548	163047888	107285659	5016862	111352	188	13202	2083	0.13116323599808521	0.6580009119774676
AOR_canu_rac10_pil3	4178	548	163033031	107278642	5016878	111352	188	13200	2084	0.13116323599808521	0.6580178344350355
AOR_canu_rac10_pil4	4178	548	163027661	107274954	5016878	111352	188	13200	2084	0.13116323599808521	0.6580168870851922
AOR_canu_rac10_pil5	4178	548	163025864	107274476	5016878	111352	188	13200	2084	0.13116323599808521	0.6580212082176115
AOR_canu_rac10_pil6	4178	548	162995173	107245807	5016878	111352	188	13200	2084	0.13116323599808521	0.6579692209658258
AOR_canu_rac10_pil7	4178	548	162992732	107243281	5016878	111352	188	13200	2084	0.13116323599808521	0.6579635771734902
AOR_canu_rac10_pil8	4178	548	162989635	107240039	5016878	111352	188	13200	2084	0.13116323599808521	0.6579561884410625
AOR_canu_rac10_pil9	4178	548	162987029	107237446	5016878	111352	188	13200	2084	0.13116323599808521	0.6579507992626824
AOR_canu_rac2	4186	548	163456981	107391791	5015462	111092	189	13196	2092	0.1309125656951744	0.6570033922258726
AOR_canu_rac2_pil1	4186	548	163350298	107347535	5030032	111150	189	13192	2092	0.1309125656951744	0.6571615498369032
AOR_canu_rac2_pil10	4186	549	163127447	107254391	5013300	111161	189	13182	2093	0.13115145723841376	0.6574883195468633
AOR_canu_rac2_pil2	4186	549	163232437	107328154	5013288	111160	189	13190	2092	0.13115145723841376	0.6575173168553503
AOR_canu_rac2_pil3	4186	549	163178077	107291659	5013299	111161	189	13181	2093	0.13115145723841376	0.6575127061952079
AOR_canu_rac2_pil4	4186	549	163166617	107289971	5013300	111161	189	13182	2093	0.13115145723841376	0.6575485413171249
AOR_canu_rac2_pil5	4186	549	163163001	107288793	5013300	111161	189	13182	2093	0.13115145723841376	0.6575558940595853
AOR_canu_rac2_pil6	4186	549	163131488	107258819	5013300	111161	189	13182	2093	0.13115145723841376	0.6574991763699232
AOR_canu_rac2_pil7	4186	549	163129710	107256909	5013300	111161	189	13182	2093	0.13115145723841376	0.6574946341779189
AOR_canu_rac2_pil8	4186	549	163129773	107256801	5013300	111161	189	13182	2093	0.13115145723841376	0.6574937182067924
AOR_canu_rac2_pil9	4186	549	163127218	107254253	5013300	111161	189	13182	2093	0.13115145723841376	0.6574883965715642
AOR_canu_rac3	4185	547	163448851	107354134	5017050	111116	189	13197	2091	0.13070489844683392	0.656806
AOR_canu_rac4	4184	546	163383363	107302582	5017464	111272	188	13198	2090	0.13049713193116635	0.6567534174210871
AOR_canu_rac5	4183	547	163367039	107358860	5017893	111263	188	13196	2089	0.13076739182404973	0.6571635297864461
AOR_canu_rac5_pil1	4183	548	163270758	107356431	5033581	111292	188	13196	2088	0.13100645469758546	0.6575361829336274
AOR_canu_rac5_pil10	4183	548	163065115	107237897	5016503	111339	188	13194	2089	0.13100645469758546	0.6576384961308248
AOR_canu_rac5_pil2	4183	548	163147148	107290610	5016840	111336	188	13194	2089	0.13100645469758546	0.6576309259172585
AOR_canu_rac5_pil3	4183	548	163106427	107272872	5016503	111339	188	13194	2089	0.13100645469758546	0.6576863583677178
AOR_canu_rac5_pil4	4183	548	163100007	107269807	5016503	111339	188	13194	2089	0.13100645469758546	0.6576934542988707
AOR_canu_rac5_pil5	4183	548	163098925	107269939	5016503	111339	188	13194	2089	0.13100645469758546	0.6576986267689993
AOR_canu_rac5_pil6	4183	548	163069463	107242599	5016503	111339	188	13194	2089	0.13100645469758546	0.6576497955352928
AOR_canu_rac5_pil7	4183	548	163067597	107240591	5016503	111339	188	13194	2089	0.13100645469758546	0.6576450071806724
AOR_canu_rac5_pil8	4183	548	163067461	107240321	5016503	111339	188	13194	2089	0.13100645469758546	0.6576438999071679
AOR_canu_rac5_pil9	4183	548	163064891	107237738	5016503	111339	188	13194	2089	0.13100645469758546	0.6576384244478476
AOR_canu_rac6	4182	547	163342520	107355849	5018081	111276	188	13200	2088	0.13079866092778575	0.6572437415560872
AOR_canu_rac7	4181	547	163326191	107358240	5018221	111298	188	13199	2087	0.13082994498923703	0.657324
AOR_canu_rac8	4180	547	163293486	107355048	5018158	111291	188	13217	2085	0.13086124401913876	0.6574361943623397
AOR_canu_rac9	4179	547	163277167	107356370	5018328	111294	188	13213	2084	0.13089255802823643	0.6575099995457417
AOR_flye	1487	825	191841179	173244309	4997529	264946	103	50826	814	0.554808	0.9030611149444614
AOR_flye_def	952	609	155869447	148372763	4658028	338366	80	78215	483	0.6397058823529411	0.9519040829085639
AOR_flye_pil1	1487	824	191381564	172846600	5007564	264626	103	50867	813	0.5541358439811701	0.9031517790292486
AOR_flye_pil10	1487	823	190732902	172310994	5007569	265011	102	50884	811	0.5534633490248824	0.9034151538259508
AOR_flye_pil2	1487	823	191059074	172527451	5007563	265021	102	50883	812	0.5534633490248824	0.9030057949511469
AOR_flye_pil3	1487	823	190899930	172399442	5007569	265016	102	50887	812	0.5534633490248824	0.9030880315147313
AOR_flye_pil4	1487	823	190781638	172324917	5007569	265010	102	50930	811	0.5534633490248824	0.9032573512132231
AOR_flye_pil5	1487	823	190760245	172320246	5007569	265011	102	50930	811	0.5534633490248824	0.903334
AOR_flye_pil6	1487	823	190743177	172317333	5007569	265011	102	50930	811	0.5534633490248824	0.9033997216057694
AOR_flye_pil7	1487	823	190737027	172313824	5007569	265011	102	50884	811	0.5534633490248824	0.9034104531785535
AOR_flye_pil8	1487	823	190734419	172311196	5007569	265011	102	50884	811	0.5534633490248824	0.9034090276071253
AOR_flye_pil9	1487	823	190732836	172310976	5007569	265011	102	50884	811	0.5534633490248824	0.9034153720652484
AOR_flye_rac1	1487	817	190599306	171790909	4995417	266175	101	50523	813	0.5494283792871554	0.9013196984043583
AOR_flye_rac10	1478	810	186433883	167584196	4996902	256682	105	49801	815	0.5480378890392422	0.8988934484618335
AOR_flye_rac10_pil1	1478	808	186138458	167266712	5010876	257101	105	49718	814	0.5466847090663058	0.8986144711696279
AOR_flye_rac10_pil10	1478	806	185551733	166761924	5010192	257099	105	49740	811	0.5453315290933695	0.89873547017747335
AOR_flye_rac10_pil2	1478	806	185821493	166910330	5010165	257099	105	49709	813	0.5453315290933695	0.8982294098777907
AOR_flye_rac10_pil3	1478	806	185703157	166852420	5010192	257099	105	49714	812	0.5453315290933695	0.8984899486657623
AOR_flye_rac10_pil4	1478	806	185630777	166813054	5010192	257099	105	49714	812	0.5453315290933695	0.898628
AOR_flye_rac10_pil5	1478	806	185598121	166785457	5010192	257099	105	49714	812	0.5453315290933695	0.8986376376084109
AOR_flye_rac10_pil6	1478	806	185588846	166779578	5010192	257099	105	49714	812	0.5453315290933695	0.8986508704300041
AOR_flye_rac10_pil7	1478	806	185566922	166766037	5010192	257099	105	49740	811	0.5453315290933695	0.8986840715070976
AOR_flye_rac10_pil8	1478	806	185560355	166765173	5010192	257099	105	49740	811	0.5453315290933695	0.8987112198615916
AOR_flye_rac10_pil9	1478	806	185551454	166761645	5010192	257099	105	49740	811	0.5453315290933695	0.8987353179134883
AOR_flye_rac2	1486	816	187408252	168621383	4995716	258798	106	49961	817	0.5491251682368775	0.8997543128463735
AOR_flye_rac2_pil1	1486	813	187150101	168291409	5011226	258998	106	49809	816	0.5471063257065949	0.8992322638393874
AOR_flye_rac2_pil10	1486	812	186565932	167851871	5010734	259046	106	49915	814	0.5464333781965006	0.8996919705576257
AOR_flye_rac2_pil2	1486	812	186845079	168007139	5010712	259027	106	49710	816	0.5464333781965006	0.8991788271822776
AOR_flye_rac2_pil3	1486	812	186710485	167924007	5010734	259045	106	49841	815	0.5464333781965006	0.8993817728018862
AOR_flye_rac2_pil4	1486	812	186660748	167890897	5010734	259046	106	49842	815	0.5464333781965006	0.8994440384434761
AOR_flye_rac2_pil5	1486	812	186630312	167885027	5010734	259046	106	49915	814	0.5464333781965006	0.8995592688073093
AOR_flye_rac2_pil6	1486	812	186614695	167872541	5010734	259046	106	49915	814	0.5464333781965006	0.8995676412299686
AOR_flye_rac2_pil7	1486	812	186597959	167861726	5010734	259046	106	49915	814	0.5464333781965006	0.8995903647584913
AOR_flye_rac2_pil8	1486	812	186581537	167853847	5010734	259046	106	49915	814	0.5464333781965006	0.8996273141430923
AOR_flye_rac2_pil9	1486	812	186573400	167851644	5010734	259046	106	49915	814	0.5464333781965006	0.8996547417799108
AOR_flye_rac3	1485	814	187203520	168380842	4996305	258357	106	49909	817	0.5481481481481482	0.8994533970301413
AOR_flye_rac4	1484	814	187170808	168360019	4996416	258323	106	49918	816	0.5485175202156334	0.8994993439361548
AOR_flye_rac5	1483	814	187129907	168330995	4996543	257870	106	49906	816	0.5488873904248146	0.8995408467765658
AOR_flye_rac5_pil1	1483	811	186887576	168006651	5011309	257905	106	49712	815	0.5468644639244774	0.8989717486624151
AOR_flye_rac5_pil10	1483	810	186243620	167486906	5010757	258595	105	49838	813	0.5461901550910316	0.8992893608919328
AOR_flye_rac5_pil2	1483	810	186588077	167710710	5010754	257931	106	49693	815	0.5461901550910316	0.8988286534514207
AOR_flye_rac5_pil3	1483	810	186403538	167578937	5010757	258543	105	49712	814	0.5461901550910316	0.8990115681173391
AOR_flye_rac5_pil4	1483	810	186338705	167554695	5010757	258531	105	49712	814	0.5461901550910316	0.8991942656250617
AOR_flye_rac5_pil5	1483	810	186311162	167534181	5010757	258525	105	49838	813	0.5461901550910316	0.8992170903855992
AOR_flye_rac5_pil6	1483	810	186279092	167507728	5010757	258536	105	49838	813	0.5461901550910316	0.8992298931755583
AOR_flye_rac5_pil7	1483	810	186266117	167502728	5010757	258564	105	49838	813	0.5461901550910316	0.8992656887779542
AOR_flye_rac5_pil8	1483	810	186262449	167500365	5010757	258595	105	49838	813	0.5461901550910316	0.8992707112961883
AOR_flye_rac5_pil9	1483	810	186243312	167486563	5010757	258595	105	49838	813	0.5461901550910316	0.8992890064154357
AOR_flye_rac6	1482	813	186605679	167814446	4996606	256663	106	49799	816	0.548583	0.8992997796171037
AOR_flye_rac7	1481	813	186556589	167801305	4996697	256675	106	49903	815	0.548953	0.899466
AOR_flye_rac8	1480	812	186507497	167728990	4996704	256669	105	49922	815	0.5486486486486486	0.8993150017985604
AOR_flye_rac9	1479	813	186482977	167757378	4996640	256651	105	49939	815	0.5496957403651116	0.8995854779817248
AOR_opra_NPMS	6044	412	144233939	72026606	4667362	49835	414	8180	3497	0.0681668	0.4993734935021084
AOR_spds_MS	7657	291	95270370	34938692	642206	19114	731	4891	5494	0.038004440381350396	0.3667319860309139
AOR_spds_NPMS	14612	357	212695967	62975322	4023528	19759	1860	5856	10209	0.024431973720229948	0.2960814108901275
AOR_Tryc_subcanu_sample01	3802	460	137718596	87598169	4970451	101692	185	12249	1955	0.12098895318253551	0.6360663813331353
AOR_Tryc_subcanu_sample02	3787	456	137602487	87132693	9160422	97344	191	12261	1944	0.12041193556905203	0.6332203356179166
AOR_Tryc_subcanu_sample03	3802	475	137748983	87854361	9160122	97167	196	12268	1966	0.12493424513413992	0.6377859138168737
AOR_Tryc_subcanu_sample04	3757	465	137804722	87994537	7904980	100616	187	12605	1922	0.12376896459941443	0.6385451508693585
AOR_Tryc_subcanu_sample05	3767	467	137461652	87514253	4970728	101257	190	12435	1935	0.12397132997079904	0.636645
AOR_Tryc_subcanu_sample06	3779	474	138101452	88582035	4981373	103562	187	12485	1934	0.1254300079386081	0.6414272530603081
AOR_Tryc_subcanu_sample07	3797	468	137130296	87341276	4973261	97857	190	12228	1948	0.12325520147484856	0.6369218075632244
AOR_Tryc_subcanu_sample08	3777	469	136882627	86281856	4957287	94488	206	12403	1938	0.12417262377548319	0.6303346004602907
AOR_Tryc_subcanu_sample09	3816	470	137524112	87301964	9199165	97487	198	12248	1981	0.12316561844863731	0.634812
AOR_Tryc_subcanu_sample11	3856	470	138909418	87596080	4968147	95274	197	12254	2013	0.12188796680497925	0.6305985674779805
AOR_Tryc_subcanu_sample12	3841	469	138934139	87930752	4967792	100458	199	12270	2002	0.12210361884925801	0.6328952166321051
AOR_Tryc_subflye_sample01	1312	746	165182975	149232117	4997451	268492	91	51025	735	0.5685975609756098	0.9034352178243551
AOR_Tryc_subflye_sample02	1326	753	165542993	149295674	4997518	250164	105	51319	747	0.5678733031674208	0.9018543841357272
AOR_Tryc_subflye_sample03	1357	766	166400929	149720452	4997313	243963	110	49996	767	0.5644804716285925	0.8997573084462768
AOR_Tryc_subflye_sample04	1342	764	166626983	150364099	4997508	248484	105	50415	757	0.5692995529061102	0.9023994571155382
AOR_Tryc_subflye_sample05	1345	790	167017533	150957240	4997484	236452	107	51327	778	0.587361	0.903841
AOR_Tryc_subflye_sample06	1350	767	167022438	150305918	4997318	247278	107	49993	768	0.5681481481481482	0.8999145252567802
AOR_Tryc_subflye_sample07	1334	749	165560025	148504450	4997669	249996	108	48861	760	0.5614692653673163	0.8969825294481564
AOR_Tryc_subflye_sample08	1300	754	164907287	149127943	4997564	232208	104	51528	741	0.58	0.9043138463614406
AOR_Tryc_subflye_sample09	1250	733	165230291	150157502	4997815	259227	93	52529	705	0.5864	0.9087770837370249
AOR_Tryc_subflye_sample10	1324	730	166668520	149779454	4997692	253870	104	49678	735	0.5513595166163142	0.8986667308259532
AOR_Tryc_subflye_sample11	1318	716	164765859	147647065	4997617	263506	96	49132	729	0.543247	0.8961022987171147
AOR_Tryc_subflye_sample12	1346	738	166195421	148766446	4997560	238532	99	48777	755	0.5482912332838039	0.8951296317604321
AOR_unic_MS	3069	286	66429913	34650250	498932	54863	259	7122	1842	0.09319	0.5216061324662581
AOR_unic_NP	979	364	77765087	58915062	4996046	126833	98	31409	648	0.3718079673135853	0.7576029844858272
AOR_unic_NPMS	979	273	78405815	67446668	4665704	293597	37	31836	350	0.278856	0.8602253289504102
NOR_canu	6951	637	223721637	138165507	5882561	104587	260	10431	3623	0.0916415	0.6175777580243613
NOR_canu_def	4411	542	115606571	59926250	707257	53001	501	9740	2595	0.12287463160281116	0.5183637009699043
NOR_canu_pil1	6951	636	224006702	138351721	5858876	104715	260	10437	3621	0.0914976	0.6176231325435968
NOR_canu_pil10	6951	637	223504377	137948478	5813969	103153	261	10434	3628	0.0916415	0.6172070536229365
NOR_canu_pil2	6951	637	223701238	138128306	5818761	104291	261	10439	3625	0.0916415	0.6174677763741299
NOR_canu_pil3	6951	637	223549192	137998579	5818353	103116	261	10435	3627	0.0916415	0.6173074380872734
NOR_canu_pil4	6951	637	223504790	137950645	5815482	103137	261	10435	3627	0.0916415	0.6172156086677159
NOR_canu_pil5	6951	637	223504601	137949015	5813947	103145	261	10435	3627	0.0916415	0.6172088376829433
NOR_canu_pil6	6951	637	223505071	137949882	5813964	103152	261	10435	3627	0.0916415	0.6172114188854355
NOR_canu_pil7	6951	637	223504150	137948610	5813962	103153	261	10434	3628	0.0916415	0.6172082710768457
NOR_canu_pil8	6951	637	223504004	137948386	5813969	103153	261	10434	3628	0.0916415	0.617208
NOR_canu_pil9	6951	637	223504069	137948239	5813962	103153	261	10434	3628	0.0916415	0.6172068348339556
NOR_canu_rac1	6951	645	225328690	139386063	5904116	104414	262	10518	3628	0.0927924	0.6185899496420096
NOR_canu_rac10	6942	642	224584657	139136653	5906154	105620	259	10488	3608	0.0924806	0.6195287552524125
NOR_canu_rac10_pil1	6942	641	224374183	138936463	5882891	105692	259	10486	3610	0.0923365	0.6192176886946035
NOR_canu_rac10_pil10	6942	640	224029755	138572600	5856432	104965	260	10475	3614	0.0921925	0.6185455141885059
NOR_canu_rac10_pil2	6942	641	224189368	138763325	5880979	105735	259	10486	3612	0.0923365	0.6189558685940896
NOR_canu_rac10_pil3	6942	641	224076184	138649976	5865147	104959	260	10481	3613	0.0923365	0.6187626615419335
NOR_canu_rac10_pil4	6942	640	224040625	138579655	5856757	104964	260	10475	3614	0.0921925	0.6185469934303209
NOR_canu_rac10_pil5	6942	640	224035714	138577964	5856765	104970	260	10475	3614	0.0921925	0.6185530044553521
NOR_canu_rac10_pil6	6942	640	224035170	138578161	5856775	104968	260	10475	3614	0.0921925	0.6185553857459076
NOR_canu_rac10_pil7	6942	640	224033940	138576796	5856773	104965	260	10475	3614	0.0921925	0.6185526889363281
NOR_canu_rac10_pil8	6942	640	224034059	138576881	5856780	104965	260	10475	3614	0.0921925	0.6185527397867661
NOR_canu_rac10_pil9	6942	640	224029725	138572499	5856425	104965	260	10475	3614	0.0921925	0.6185451461854001
NOR_canu_rac2	6950	645	225280495	139406458	5905148	104394	262	10511	3625	0.0928058	0.618813
NOR_canu_rac2_pil1	6950	645	225102420	139272781	5881386	104817	262	10505	3628	0.0928058	0.6187085016678185
NOR_canu_rac2_pil10	6950	644	224760354	138896957	5857807	103124	263	10500	3632	0.0926619	0.6179780131508424
NOR_canu_rac2_pil2	6950	644	224889770	139017814	5867506	103123	262	10505	3630	0.0926619	0.6181597944628606
NOR_canu_rac2_pil3	6950	644	224785815	138922002	5860087	103082	263	10500	3631	0.0926619	0.6180194332992053
NOR_canu_rac2_pil4	6950	644	224765561	138900935	5857802	103123	263	10505	3631	0.0926619	0.6179813952903577
NOR_canu_rac2_pil5	6950	644	224763611	138899695	5857796	103095	263	10505	3631	0.0926619	0.6179812398547023
NOR_canu_rac2_pil6	6950	644	224763932	138899819	5857802	103124	263	10503	3631	0.0926619	0.6179809089654118
NOR_canu_rac2_pil7	6950	644	224761804	138898491	5857800	103095	263	10504	3631	0.0926619	0.6179808514083648
NOR_canu_rac2_pil8	6950	644	224760336	138896958	5857807	103124	263	10500	3632	0.0926619	0.6179780670909836
NOR_canu_rac2_pil9	6950	644	224760309	138896918	5857800	103095	263	10500	3632	0.0926619	0.6179779633600699
NOR_canu_rac3	6949	645	225223201	139411443	5905567	105256	261	10504	3623	0.0928191	0.6189923701510662
NOR_canu_rac4	6948	644	225108567	139351275	5905803	105278	261	10504	3620	0.0926885	0.6190403006741187
NOR_canu_rac5	6947	644	225067663	139354551	5905916	105285	261	10504	3618	0.0927019	0.6191673612392732
NOR_canu_rac5_pil1	6947	644	224863495	139244844	5885203	105703	260	10492	3620	0.0927019	0.6192416603682158
NOR_canu_rac5_pil10	6947	644	224488041	138889425	5853297	104948	261	10486	3624	0.0927019	0.6186940933748895
NOR_canu_rac5_pil2	6947	644	224651558	139038017	5875104	104939	261	10488	3622	0.0927019	0.6189051980667768
NOR_canu_rac5_pil3	6947	644	224551443	138944706	5865206	104943	261	10488	3623	0.0927019	0.6187655894956774
NOR_canu_rac5_pil4	6947	644	224506413	138901698	5863995	104947	261	10486	3624	0.0927019	0.6186981304627588
NOR_canu_rac5_pil5	6947	644	224492301	138892677	5854824	104953	261	10486	3624	0.0927019	0.618697
NOR_canu_rac5_pil6	6947	644	224489745	138890625	5853293	104951	261	10486	3624	0.0927019	0.6186947426039439
NOR_canu_rac5_pil7	6947	644	224488350	138889193	5853290	104948	261	10486	3624	0.0927019	0.6186922083039053
NOR_canu_rac5_pil8	6947	644	224488249	138889377	5853297	104948	261	10486	3624	0.0927019	0.6186933063030841
NOR_canu_rac5_pil9	6947	644	224487771	138889206	5853290	104948	261	10486	3624	0.0927019	0.6186938619476069
NOR_canu_rac6	6946	642	224944851	139240196	5905922	105611	260	10506	3616	0.0924273	0.6189970358556907
NOR_canu_rac7	6945	643	224895755	139293162	5905991	105633	260	10503	3613	0.0925846	0.6193676799279737
NOR_canu_rac8	6944	644	224822093	139333582	5905996	106272	259	10496	3611	0.0927419	0.6197503997082706
NOR_canu_rac9	6943	642	224772990	139227466	5906150	106268	259	10497	3609	0.0924672	0.6194136848915878
NOR_flye	2301	1205	263819141	232558548	7291784	241709	152	45354	1308	0.5236853541938288	0.8815074869794985
NOR_flye_def	2354	1341	249717467	219903778	3971601	182097	272	46038	1442	0.5696686491079015	0.8806103178997887
NOR_flye_pil1	2301	1203	263360101	232038786	7289009	240954	152	45354	1308	0.5228161668839635	0.8810703865882858
NOR_flye_pil10	2301	1200	262631143	231233521	7286954	239617	153	45269	1308	0.5215123859191656	0.8804497378286931
NOR_flye_pil2	2301	1201	262944118	231568804	7288847	241020	152	45269	1308	0.5219469795740982	0.8806768744680571
NOR_flye_pil3	2301	1201	262761624	231398277	7286952	239617	153	45269	1308	0.5219469795740982	0.8806395449892638
NOR_flye_pil4	2301	1200	262661169	231262593	7286954	239617	153	45269	1308	0.5215123859191656	0.8804597721104332
NOR_flye_pil5	2301	1200	262642970	231244497	7286954	239617	153	45269	1308	0.5215123859191656	0.880452
NOR_flye_pil6	2301	1200	262640135	231242097	7286954	239617	153	45269	1308	0.5215123859191656	0.8804522469499949
NOR_flye_pil7	2301	1200	262636578	231238562	7286954	239617	153	45269	1308	0.5215123859191656	0.8804507116293603
NOR_flye_pil8	2301	1200	262631434	231233765	7286954	239617	153	45269	1308	0.5215123859191656	0.8804496913343587
NOR_flye_pil9	2301	1200	262630882	231233232	7286954	239617	153	45269	1308	0.5215123859191656	0.8804495124073033
NOR_flye_rac1	2301	1192	261954424	230437068	7287967	242623	150	44922	1305	0.5180356366797044	0.879684
NOR_flye_rac10	2292	1169	258932651	227106589	7288950	242505	148	44642	1295	0.5100349040139616	0.8770874902138163
NOR_flye_rac10_pil1	2292	1168	258574214	226720411	7282540	242505	147	44652	1296	0.5095986038394416	0.87681
NOR_flye_rac10_pil10	2292	1164	257994779	226000282	7282058	241016	148	44592	1296	0.5078534031413613	0.8759878121409581
NOR_flye_rac10_pil2	2292	1166	258206079	226291012	7282053	241782	148	44592	1296	0.5087260034904014	0.8763969186023696
NOR_flye_rac10_pil3	2292	1166	258054511	226151745	7282058	241016	148	44592	1296	0.5087260034904014	0.8763719887074557
NOR_flye_rac10_pil4	2292	1165	258013313	226067532	7282058	241016	148	44592	1296	0.5082897033158813	0.8761855323333645
NOR_flye_rac10_pil5	2292	1165	258013271	226068507	7282058	241016	148	44592	1296	0.5082897033158813	0.8761894538362719
NOR_flye_rac10_pil6	2292	1164	258009333	226014807	7282058	241016	148	44592	1296	0.5078534031413613	0.8759946951221335
NOR_flye_rac10_pil7	2292	1164	258006972	226012344	7282058	241016	148	44592	1296	0.5078534031413613	0.8759931650219127
NOR_flye_rac10_pil8	2292	1164	258001775	226007091	7282058	241016	148	44592	1296	0.5078534031413613	0.8759904500657021
NOR_flye_rac10_pil9	2292	1164	257999679	226005189	7282058	241016	148	44592	1296	0.5078534031413613	0.8759901945459397
NOR_flye_rac2	2300	1188	260799962	229194891	7288421	240912	151	44759	1305	0.5165217391304348	0.8788148941524769
NOR_flye_rac2_pil1	2300	1185	260432101	228704571	7281687	239277	150	44780	1306	0.5152173913043478	0.8781735051932019
NOR_flye_rac2_pil10	2300	1183	259814014	228047532	7281251	236547	151	44753	1306	0.5143478260869565	0.8777337622750403
NOR_flye_rac2_pil2	2300	1184	260037371	228305041	7281244	239053	151	44759	1306	0.5147826086956522	0.8779701168413981
NOR_flye_rac2_pil3	2300	1184	259883974	228158837	7281251	238049	151	44753	1306	0.5147826086956522	0.8779257662113479
NOR_flye_rac2_pil4	2300	1184	259826015	228106306	7281251	236547	151	44753	1306	0.5147826086956522	0.8779194261975654
NOR_flye_rac2_pil5	2300	1183	259820806	228052306	7281251	236547	151	44753	1306	0.5143478260869565	0.8777291915567378
NOR_flye_rac2_pil6	2300	1183	259820315	228052651	7281251	236547	151	44753	1306	0.5143478260869565	0.87773217810162385
NOR_flye_rac2_pil7	2300	1183	259816477	228050026	7281251	236547	151	44753	1306	0.5143478260869565	0.8777350406456323
NOR_flye_rac2_pil8	2300	1183	259814007	228047588	7281251	236547	151	44753	1306	0.5143478260869565	0.8777340014620536
NOR_flye_rac2_pil9	2300	1183	259814030	228047489	7281251	236547	151	44753	1306	0.5143478260869565	0.8777335427189978
NOR_flye_rac3	2299	1186	260292105	228697923	7288660	240922	150	44748	1304	0.5158764680295781	0.8786202831622573
NOR_flye_rac4	2298	1182	260062787	228376358	7288735	240926	150	44715	1303	0.5143603133159269	0.8781585425368836
NOR_flye_rac5	2297	1180	259923575	228191271	7288771	241747	149	44634	1302	0.5137135393992164	0.8779167915030408
NOR_flye_rac5_pil1	2297	1179	259574811	227815260	7282369	240976	149	44711	1302	0.5132781889420984	0.8776477930287311
NOR_flye_rac5_pil10	2297	1178	258987251	227238552	7281885	239079	150	44695	1302	0.5128428384849804	0.8774121163207373
NOR_flye_rac5_pil2	2297	1178	259138866	227367246	7281886	241021	149	44654	1303	0.5128428384849804	0.8773953884632651
NOR_flye_rac5_pil3	2297	1178	259014581	227253325	7281885	239079	150	44654	1303	0.5128428384849804	0.8773765713212879
NOR_flye_rac5_pil4	2297	1178	258989619	227238356	7281885	239079	150	44695	1302	0.5128428384849804	0.8774033371584673
NOR_flye_rac5_pil5	2297	1178	258987812	227239376	7281885	239079	150	44695	1302	0.5128428384849804	0.8774133973532314
NOR_flye_rac5_pil6	2297	1178	258986390	227237875	7281885	239079	150	44695	1302	0.5128428384849804	0.877412
NOR_flye_rac5_pil7	2297	1178	258985274	227236728	7281885	239079	150	44695	1302	0.5128428384849804	0.8774117712963093
NOR_flye_rac5_pil8	2297	1178	258984586	227235945	7281885	239079	150	44695	1302	0.5128428384849804	0.8774110788199573
NOR_flye_rac5_pil9	2297	1178	258984908	227236271	7281885	239079	150	44695	1302	0.5128428384849804	0.877411
NOR_flye_rac6	2296	1177	259735221	227948459	7288679	241475	149	44699	1301	0.5126306620209059	0.8776185922047129
NOR_flye_rac7	2295	1176	259538676	227805068	7288535	241817	149	44705	1299	0.5124183006535947	0.8777307163268414
NOR_flye_rac8	2294	1177	259391278	227779621	7288680	242501	148	44695	1298	0.513078	0.8781313803465667
NOR_flye_rac9	2293	1174	259137390	227468978	7288763	242497	148	44622	1297	0.5119930222416049	0.8777929653455258
NOR_opra_NPMS	10305	721	228241084	107477476	2034474	43406	865	7840	6202	0.069966	0.47089452133867366
NOR_spds_MS	12720	323	146558208	37061374	864868	14939	1811	4895	9393	0.0253931	0.25287818748438845
NOR_spds_NPMS	24216	531	325253610	81525439	3887897	17256	3647	5641	17384	0.021927651139742318	0.250652
NOR_Tryc_subcanu_sample01	5934	549	190003024	117289152	4512624	99047	226	10380	3104	0.0925177	0.6173015014750503
NOR_Tryc_subcanu_sample02	5975	581	190765515	119046949	8251980	98541	243	10291	3088	0.0972385	0.6240485813172261
NOR_Tryc_subcanu_sample03	5895	581	190714145	119473231	7130305	98415	235	10494	3058	0.0985581	0.6264518607154178
NOR_Tryc_subcanu_sample04	6002	580	191415438	118721868	7142627	95648	248	10394	3146	0.0966345	0.6202314151902418
NOR_Tryc_subcanu_sample05	6068	577	191524788	117841336	6656727	93791	244	10283	3188	0.095089	0.6152798143287854
NOR_Tryc_subcanu_sample06	6003	547	190501654	116560409	5194591	95888	238	10223	3140	0.0911211	0.6118603516166846
NOR_Tryc_subcanu_sample07	5885	560	189329287	117756648	6885837	103776	230	10364	3037	0.0951572	0.621967
NOR_Tryc_subcanu_sample08	5946	573	190024411	117544562	8212716	97017	245	10312	3106	0.0963673	0.618576
NOR_Tryc_subcanu_sample09	5962	566	190902249	118327469	5631447	100646	233	10397	3111	0.0949346	0.6198327658256138
NOR_Tryc_subcanu_sample10	5960	580	190627066	118698784	6992686	99920	235	10317	3103	0.0973154	0.6226753969974023
NOR_Tryc_subcanu_sample11	6023	562	191077146	118347875	5892823	99230	229	10204	3149	0.093309	0.6193722141945746
NOR_Tryc_subcanu_sample12	5966	550	190994371	117610712	7128173	100659	232	10303	3116	0.0921891	0.6157810378610582
NOR_Tryc_subflye_sample01	1954	1035	222197339	196548635	7302075	237147	133	45708	1107	0.529683	0.8845679065490519
NOR_Tryc_subflye_sample02	1956	1022	222659210	195490317	12036406	233095	141	44913	1126	0.5224948875255624	0.8779799272619354
NOR_Tryc_subflye_sample03	1903	1000	222474056	195814184	7281127	251884	124	45673	1093	0.5254860746190226	0.8801663776921477
NOR_Tryc_subflye_sample04	1917	995	222635498	196011826	7708136	250592	120	45287	1087	0.5190401669274909	0.8804158715067082
NOR_Tryc_subflye_sample05	1969	1025	225011919	197774611	7264434	239596	129	45434	1125	0.5205688166582021	0.8789517101091876
NOR_Tryc_subflye_sample06	1977	1023	224530139	197023754	7269703	247125	133	45580	1129	0.5174506828528073	0.8774935733683397
NOR_Tryc_subflye_sample07	1989	1015	223635078	196138459	12394623	250550	137	44717	1124	0.510307	0.8770469317876868
NOR_Tryc_subflye_sample08	1950	963	222237712	193014994	7233609	260470	131	44268	1112	0.4938461538461538	0.8685069345926312
NOR_Tryc_subflye_sample09	1995	998	223063220	194939452	7169425	255552	135	43541	1123	0.5002506265664161	0.8739201917734354
NOR_Tryc_subflye_sample10	2015	1031	225451510	197100947	7169027	239312	133	43824	1156	0.5116625310173697	0.8742498420170262
NOR_Tryc_subflye_sample11	1956	1013	223371493	196095809	7169333	240190	134	44977	1118	0.5178936605316974	0.8778909357068228
NOR_Tryc_subflye_sample12	1984	1004	223474105	195824398	12497757	239810	124	45049	1117	0.5060483870967742	0.8762733292969224
NOR_unic_MS	2452	216	57896838	29378242	865267	52451	208	8260	1458	0.0880914	0.5074239460192973
NOR_unic_NP	1075	424	102920792	83216514	5227089	231126	68	34054	654	0.3944186046511628	0.8085491024981619
NOR_unic_NPMS	600	168	66793715	60362188	7146384	552742	20	54007	164	0.28	0.9037105961242012

## Sheet: Circular contigs
Assembly	asmblr	setting	sample	rctr	asmblr2	setting2	full_cont	contig	gtdb_lineage_tophy	gtdb_dom	gtdb_phy	checkm_lin	checkm_dbgenomes	checkm_dbmarkers	checkm_dbmrkrsets	checkm_0copy	checkm_1copy	checkm_2copy	checkm_3copy	checkm_4copy	checkm_5copy	checkm_comp	checkm_cont	checkm_strnhet	length	circ_count	circ_maxleng	circ_totlength	circ_count_5kb	circ_count_1mb
AOR_canu	canu	meta	none	AOR	canu	meta	canu_meta_none_tig00000002	tig00000002	d__Bacteria;p__Chloroflexota	d__Bacteria	p__Chloroflexota	k__Bacteria (UID1452)	924	163	110	100	63	0	0	0	0	30.5	0	0	4651842	9	4651842	11153608	9	3
AOR_canu	canu	meta	none	AOR	canu	meta	canu_meta_none_tig00000082	tig00000082	d__Bacteria;p__Patescibacteria	d__Bacteria	p__Patescibacteria	k__Bacteria (UID1452)	924	151	101	96	55	0	0	0	0	31.73	0	0	1437876	9	4651842	11153608	9	3
AOR_canu	canu	meta	none	AOR	canu	meta	canu_meta_none_tig00000214	tig00000214	NA	NA	NA	root (UID1)	5656	56	24	56	0	0	0	0	0	0	0	0	234027	9	4651842	11153608	9	3
AOR_canu	canu	meta	none	AOR	canu	meta	canu_meta_none_tig00000443	tig00000443	NA	NA	NA	root (UID1)	5656	56	24	56	0	0	0	0	0	0	0	0	83619	9	4651842	11153608	9	3
AOR_canu	canu	meta	none	AOR	canu	meta	canu_meta_none_tig00000890	tig00000890	NA	NA	NA	root (UID1)	5656	56	24	56	0	0	0	0	0	0	0	0	25752	9	4651842	11153608	9	3
AOR_canu	canu	meta	none	AOR	canu	meta	canu_meta_none_tig00003257	tig00003257	NA	NA	NA	root (UID1)	5656	56	24	56	0	0	0	0	0	0	0	0	14318	9	4651842	11153608	9	3
AOR_canu	canu	meta	none	AOR	canu	meta	canu_meta_none_tig00014908	tig00014908	d__Bacteria;p__Nitrospirota	d__Bacteria	p__Nitrospirota	k__Bacteria (UID3187)	2258	181	110	112	69	0	0	0	0	33.72	0	0	4555079	9	4651842	11153608	9	3
AOR_canu	canu	meta	none	AOR	canu	meta	canu_meta_none_tig00014960	tig00014960	NA	NA	NA	root (UID1)	5656	56	24	56	0	0	0	0	0	0	0	0	133829	9	4651842	11153608	9	3
AOR_canu	canu	meta	none	AOR	canu	meta	canu_meta_none_tig00069323	tig00069323	NA	NA	NA	root (UID1)	5656	56	24	56	0	0	0	0	0	0	0	0	17266	9	4651842	11153608	9	3
AOR_canu_def	canu	def	none	AOR	canu	def	canu_def_none_tig00001241	tig00001241	NA	NA	NA	root (UID1)	5656	56	24	56	0	0	0	0	0	0	0	0	15458	1	15458	15458	1	0
AOR_flye	flye	meta	none	AOR	flye	meta	flye_meta_none_contig104	contig104	d__Bacteria;p__Planctomycetota	d__Bacteria	p__Planctomycetota	k__Bacteria (UID2565)	2921	143	88	36	106	1	0	0	0	66.64	0.07	0	4997529	49	4997529	28626706	49	7
AOR_flye	flye	meta	none	AOR	flye	meta	flye_meta_none_contig1090	contig1090	NA	NA	NA	root (UID1)	5656	56	24	56	0	0	0	0	0	0	0	0	5874	49	4997529	28626706	49	7
AOR_flye	flye	meta	none	AOR	flye	meta	flye_meta_none_contig1106	contig1106	NA	NA	NA	root (UID1)	5656	56	24	56	0	0	0	0	0	0	0	0	2324	49	4997529	28626706	49	7
AOR_flye	flye	meta	none	AOR	flye	meta	flye_meta_none_contig1165	contig1165	NA	NA	NA	root (UID1)	5656	56	24	56	0	0	0	0	0	0	0	0	7573	49	4997529	28626706	49	7
AOR_flye	flye	meta	none	AOR	flye	meta	flye_meta_none_contig1219	contig1219	NA	NA	NA	root (UID1)	5656	56	24	56	0	0	0	0	0	0	0	0	9372	49	4997529	28626706	49	7
AOR_flye	flye	meta	none	AOR	flye	meta	flye_meta_none_contig1257	contig1257	NA	NA	NA	root (UID1)	5656	56	24	56	0	0	0	0	0	0	0	0	20299	49	4997529	28626706	49	7
AOR_flye	flye	meta	none	AOR	flye	meta	flye_meta_none_contig1358	contig1358	NA	NA	NA	root (UID1)	5656	56	24	56	0	0	0	0	0	0	0	0	11484	49	4997529	28626706	49	7
AOR_flye	flye	meta	none	AOR	flye	meta	flye_meta_none_contig136	contig136	NA	NA	NA	root (UID1)	5656	56	24	56	0	0	0	0	0	0	0	0	9943	49	4997529	28626706	49	7
AOR_flye	flye	meta	none	AOR	flye	meta	flye_meta_none_contig1522	contig1522	NA	NA	NA	root (UID1)	5656	56	24	56	0	0	0	0	0	0	0	0	22354	49	4997529	28626706	49	7
AOR_flye	flye	meta	none	AOR	flye	meta	flye_meta_none_contig1530	contig1530	d__Bacteria;p__Patescibacteria	d__Bacteria	p__Patescibacteria	k__Bacteria (UID1452)	924	151	101	76	75	0	0	0	0	45.06	0	0	1437412	49	4997529	28626706	49	7
AOR_flye	flye	meta	none	AOR	flye	meta	flye_meta_none_contig1591	contig1591	NA	NA	NA	root (UID1)	5656	56	24	56	0	0	0	0	0	0	0	0	2167	49	4997529	28626706	49	7
AOR_flye	flye	meta	none	AOR	flye	meta	flye_meta_none_contig164	contig164	NA	NA	NA	root (UID1)	5656	56	24	56	0	0	0	0	0	0	0	0	19539	49	4997529	28626706	49	7
AOR_flye	flye	meta	none	AOR	flye	meta	flye_meta_none_contig1728	contig1728	NA	NA	NA	root (UID1)	5656	56	24	56	0	0	0	0	0	0	0	0	23179	49	4997529	28626706	49	7
AOR_flye	flye	meta	none	AOR	flye	meta	flye_meta_none_contig1744	contig1744	NA	NA	NA	root (UID1)	5656	56	24	56	0	0	0	0	0	0	0	0	83800	49	4997529	28626706	49	7
AOR_flye	flye	meta	none	AOR	flye	meta	flye_meta_none_contig1787	contig1787	NA	NA	NA	root (UID1)	5656	56	24	56	0	0	0	0	0	0	0	0	17440	49	4997529	28626706	49	7
AOR_flye	flye	meta	none	AOR	flye	meta	flye_meta_none_contig1799	contig1799	NA	NA	NA	root (UID1)	5656	56	24	56	0	0	0	0	0	0	0	0	4916	49	4997529	28626706	49	7
AOR_flye	flye	meta	none	AOR	flye	meta	flye_meta_none_contig18	contig18	NA	NA	NA	root (UID1)	5656	56	24	56	0	0	0	0	0	0	0	0	8263	49	4997529	28626706	49	7
AOR_flye	flye	meta	none	AOR	flye	meta	flye_meta_none_contig1803	contig1803	NA	NA	NA	root (UID1)	5656	56	24	56	0	0	0	0	0	0	0	0	6050	49	4997529	28626706	49	7
AOR_flye	flye	meta	none	AOR	flye	meta	flye_meta_none_contig1809	contig1809	NA	NA	NA	root (UID1)	5656	56	24	56	0	0	0	0	0	0	0	0	25072	49	4997529	28626706	49	7
AOR_flye	flye	meta	none	AOR	flye	meta	flye_meta_none_contig1810	contig1810	NA	NA	NA	root (UID1)	5656	56	24	56	0	0	0	0	0	0	0	0	223061	49	4997529	28626706	49	7
AOR_flye	flye	meta	none	AOR	flye	meta	flye_meta_none_contig1814	contig1814	NA	NA	NA	root (UID1)	5656	56	24	56	0	0	0	0	0	0	0	0	14984	49	4997529	28626706	49	7
AOR_flye	flye	meta	none	AOR	flye	meta	flye_meta_none_contig1818	contig1818	NA	NA	NA	root (UID1)	5656	56	24	56	0	0	0	0	0	0	0	0	44009	49	4997529	28626706	49	7
AOR_flye	flye	meta	none	AOR	flye	meta	flye_meta_none_contig1819	contig1819	NA	NA	NA	root (UID1)	5656	56	24	56	0	0	0	0	0	0	0	0	18213	49	4997529	28626706	49	7
AOR_flye	flye	meta	none	AOR	flye	meta	flye_meta_none_contig1830	contig1830	NA	NA	NA	root (UID1)	5656	56	24	56	0	0	0	0	0	0	0	0	11354	49	4997529	28626706	49	7
AOR_flye	flye	meta	none	AOR	flye	meta	flye_meta_none_contig1831	contig1831	NA	NA	NA	root (UID1)	5656	56	24	56	0	0	0	0	0	0	0	0	77581	49	4997529	28626706	49	7
AOR_flye	flye	meta	none	AOR	flye	meta	flye_meta_none_contig1840	contig1840	NA	NA	NA	k__Bacteria (UID203)	5449	103	57	96	7	0	0	0	0	2.22	0	0	39072	49	4997529	28626706	49	7
AOR_flye	flye	meta	none	AOR	flye	meta	flye_meta_none_contig1841	contig1841	NA	NA	NA	root (UID1)	5656	56	24	56	0	0	0	0	0	0	0	0	11325	49	4997529	28626706	49	7
AOR_flye	flye	meta	none	AOR	flye	meta	flye_meta_none_contig209	contig209	NA	NA	NA	k__Bacteria (UID203)	5449	104	58	97	7	0	0	0	0	9.31	0	0	3672245	49	4997529	28626706	49	7
AOR_flye	flye	meta	none	AOR	flye	meta	flye_meta_none_contig22	contig22	d__Bacteria;p__Proteobacteria	d__Bacteria	p__Proteobacteria	o__Rhizobiales (UID3447)	356	408	244	62	346	0	0	0	0	82.47	0	0	4243910	49	4997529	28626706	49	7
AOR_flye	flye	meta	none	AOR	flye	meta	flye_meta_none_contig292	contig292	d__Bacteria;p__Bacteroidota	d__Bacteria	p__Bacteroidota	o__Cytophagales (UID2936)	47	454	336	158	289	6	1	0	0	60.9	1.37	33.33	4012467	49	4997529	28626706	49	7
AOR_flye	flye	meta	none	AOR	flye	meta	flye_meta_none_contig306	contig306	NA	NA	NA	root (UID1)	5656	56	24	56	0	0	0	0	0	0	0	0	15542	49	4997529	28626706	49	7
AOR_flye	flye	meta	none	AOR	flye	meta	flye_meta_none_contig349	contig349	d__Bacteria;p__Chloroflexota	d__Bacteria	p__Chloroflexota	k__Bacteria (UID1452)	924	163	110	41	121	1	0	0	0	72.87	0.91	0	4658091	49	4997529	28626706	49	7
AOR_flye	flye	meta	none	AOR	flye	meta	flye_meta_none_contig396	contig396	NA	NA	NA	root (UID1)	5656	56	24	56	0	0	0	0	0	0	0	0	244146	49	4997529	28626706	49	7
AOR_flye	flye	meta	none	AOR	flye	meta	flye_meta_none_contig538	contig538	NA	NA	NA	root (UID1)	5656	56	24	56	0	0	0	0	0	0	0	0	909	49	4997529	28626706	49	7
AOR_flye	flye	meta	none	AOR	flye	meta	flye_meta_none_contig615	contig615	NA	NA	NA	root (UID1)	5656	56	24	56	0	0	0	0	0	0	0	0	130033	49	4997529	28626706	49	7
AOR_flye	flye	meta	none	AOR	flye	meta	flye_meta_none_contig62	contig62	d__Bacteria;p__Nitrospirota	d__Bacteria	p__Nitrospirota	k__Bacteria (UID3187)	2258	181	110	36	140	5	0	0	0	77.53	3.86	0	4340240	49	4997529	28626706	49	7
AOR_flye	flye	meta	none	AOR	flye	meta	flye_meta_none_contig765	contig765	NA	NA	NA	root (UID1)	5656	56	24	56	0	0	0	0	0	0	0	0	4517	49	4997529	28626706	49	7
AOR_flye	flye	meta	none	AOR	flye	meta	flye_meta_none_contig800	contig800	NA	NA	NA	root (UID1)	5656	56	24	56	0	0	0	0	0	0	0	0	7273	49	4997529	28626706	49	7
AOR_flye	flye	meta	none	AOR	flye	meta	flye_meta_none_contig805	contig805	NA	NA	NA	root (UID1)	5656	56	24	56	0	0	0	0	0	0	0	0	14609	49	4997529	28626706	49	7
AOR_flye	flye	meta	none	AOR	flye	meta	flye_meta_none_contig818	contig818	NA	NA	NA	root (UID1)	5656	56	24	56	0	0	0	0	0	0	0	0	18091	49	4997529	28626706	49	7
AOR_flye	flye	meta	none	AOR	flye	meta	flye_meta_none_contig820	contig820	NA	NA	NA	root (UID1)	5656	56	24	56	0	0	0	0	0	0	0	0	8492	49	4997529	28626706	49	7
AOR_flye	flye	meta	none	AOR	flye	meta	flye_meta_none_contig852	contig852	NA	NA	NA	root (UID1)	5656	56	24	56	0	0	0	0	0	0	0	0	40486	49	4997529	28626706	49	7
AOR_flye	flye	meta	none	AOR	flye	meta	flye_meta_none_contig856	contig856	NA	NA	NA	root (UID1)	5656	56	24	56	0	0	0	0	0	0	0	0	9002	49	4997529	28626706	49	7
AOR_flye	flye	meta	none	AOR	flye	meta	flye_meta_none_contig861	contig861	NA	NA	NA	root (UID1)	5656	56	24	56	0	0	0	0	0	0	0	0	35414	49	4997529	28626706	49	7
AOR_flye	flye	meta	none	AOR	flye	meta	flye_meta_none_contig889	contig889	NA	NA	NA	root (UID1)	5656	56	24	56	0	0	0	0	0	0	0	0	4248	49	4997529	28626706	49	7
AOR_flye	flye	meta	none	AOR	flye	meta	flye_meta_none_contig916	contig916	NA	NA	NA	root (UID1)	5656	56	24	56	0	0	0	0	0	0	0	0	3834	49	4997529	28626706	49	7
AOR_flye	flye	meta	none	AOR	flye	meta	flye_meta_none_contig935	contig935	NA	NA	NA	root (UID1)	5656	56	24	56	0	0	0	0	0	0	0	0	802	49	4997529	28626706	49	7
AOR_flye	flye	meta	none	AOR	flye	meta	flye_meta_none_contig969	contig969	NA	NA	NA	root (UID1)	5656	56	24	56	0	0	0	0	0	0	0	0	4164	49	4997529	28626706	49	7
AOR_flye	flye	meta	none	AOR	flye	meta	flye_meta_none_contig99	contig99	NA	NA	NA	root (UID1)	5656	56	24	56	0	0	0	0	0	0	0	0	4002	49	4997529	28626706	49	7
AOR_flye_def	flye	def	none	AOR	flye	def	flye_def_none_contig1009	contig1009	NA	NA	NA	root (UID1)	5656	56	24	56	0	0	0	0	0	0	0	0	22371	31	4658028	22234400	31	6
AOR_flye_def	flye	def	none	AOR	flye	def	flye_def_none_contig1029	contig1029	NA	NA	NA	root (UID1)	5656	56	24	56	0	0	0	0	0	0	0	0	83810	31	4658028	22234400	31	6
AOR_flye_def	flye	def	none	AOR	flye	def	flye_def_none_contig1038	contig1038	NA	NA	NA	root (UID1)	5656	56	24	56	0	0	0	0	0	0	0	0	9126	31	4658028	22234400	31	6
AOR_flye_def	flye	def	none	AOR	flye	def	flye_def_none_contig1040	contig1040	NA	NA	NA	root (UID1)	5656	56	24	56	0	0	0	0	0	0	0	0	11355	31	4658028	22234400	31	6
AOR_flye_def	flye	def	none	AOR	flye	def	flye_def_none_contig1047	contig1047	NA	NA	NA	root (UID1)	5656	56	24	56	0	0	0	0	0	0	0	0	23174	31	4658028	22234400	31	6
AOR_flye_def	flye	def	none	AOR	flye	def	flye_def_none_contig1049	contig1049	NA	NA	NA	k__Bacteria (UID203)	5449	103	57	96	7	0	0	0	0	2.22	0	0	39074	31	4658028	22234400	31	6
AOR_flye_def	flye	def	none	AOR	flye	def	flye_def_none_contig112	contig112	NA	NA	NA	root (UID1)	5656	56	24	56	0	0	0	0	0	0	0	0	9943	31	4658028	22234400	31	6
AOR_flye_def	flye	def	none	AOR	flye	def	flye_def_none_contig139	contig139	d__Bacteria;p__Chloroflexota	d__Bacteria	p__Chloroflexota	k__Bacteria (UID1452)	924	163	110	43	118	2	0	0	0	70.37	1.01	0	4658028	31	4658028	22234400	31	6
AOR_flye_def	flye	def	none	AOR	flye	def	flye_def_none_contig185	contig185	NA	NA	NA	root (UID1)	5656	56	24	56	0	0	0	0	0	0	0	0	1781	31	4658028	22234400	31	6
AOR_flye_def	flye	def	none	AOR	flye	def	flye_def_none_contig203	contig203	d__Bacteria;p__Proteobacteria	d__Bacteria	p__Proteobacteria	o__Rhizobiales (UID3447)	356	408	244	62	346	0	0	0	0	82.8	0	0	4243910	31	4658028	22234400	31	6
AOR_flye_def	flye	def	none	AOR	flye	def	flye_def_none_contig304	contig304	NA	NA	NA	root (UID1)	5656	56	24	56	0	0	0	0	0	0	0	0	41477	31	4658028	22234400	31	6
AOR_flye_def	flye	def	none	AOR	flye	def	flye_def_none_contig31	contig31	NA	NA	NA	root (UID1)	5656	56	24	56	0	0	0	0	0	0	0	0	895	31	4658028	22234400	31	6
AOR_flye_def	flye	def	none	AOR	flye	def	flye_def_none_contig396	contig396	d__Bacteria;p__Bacteroidota	d__Bacteria	p__Bacteroidota	o__Cytophagales (UID2936)	47	454	336	162	285	7	0	0	0	59.51	1.07	42.86	4012501	31	4658028	22234400	31	6
AOR_flye_def	flye	def	none	AOR	flye	def	flye_def_none_contig447	contig447	NA	NA	NA	root (UID1)	5656	56	24	56	0	0	0	0	0	0	0	0	92623	31	4658028	22234400	31	6
AOR_flye_def	flye	def	none	AOR	flye	def	flye_def_none_contig476	contig476	NA	NA	NA	root (UID1)	5656	56	24	56	0	0	0	0	0	0	0	0	18084	31	4658028	22234400	31	6
AOR_flye_def	flye	def	none	AOR	flye	def	flye_def_none_contig497	contig497	NA	NA	NA	root (UID1)	5656	56	24	56	0	0	0	0	0	0	0	0	35413	31	4658028	22234400	31	6
AOR_flye_def	flye	def	none	AOR	flye	def	flye_def_none_contig553	contig553	NA	NA	NA	root (UID1)	5656	56	24	56	0	0	0	0	0	0	0	0	20306	31	4658028	22234400	31	6
AOR_flye_def	flye	def	none	AOR	flye	def	flye_def_none_contig571	contig571	NA	NA	NA	root (UID1)	5656	56	24	56	0	0	0	0	0	0	0	0	130039	31	4658028	22234400	31	6
AOR_flye_def	flye	def	none	AOR	flye	def	flye_def_none_contig596	contig596	NA	NA	NA	root (UID1)	5656	56	24	56	0	0	0	0	0	0	0	0	40494	31	4658028	22234400	31	6
AOR_flye_def	flye	def	none	AOR	flye	def	flye_def_none_contig652	contig652	NA	NA	NA	root (UID1)	5656	56	24	56	0	0	0	0	0	0	0	0	11476	31	4658028	22234400	31	6
AOR_flye_def	flye	def	none	AOR	flye	def	flye_def_none_contig721	contig721	NA	NA	NA	root (UID1)	5656	56	24	56	0	0	0	0	0	0	0	0	14496	31	4658028	22234400	31	6
AOR_flye_def	flye	def	none	AOR	flye	def	flye_def_none_contig82	contig82	NA	NA	NA	root (UID1)	5656	56	24	56	0	0	0	0	0	0	0	0	17537	31	4658028	22234400	31	6
AOR_flye_def	flye	def	none	AOR	flye	def	flye_def_none_contig903	contig903	NA	NA	NA	root (UID1)	5656	56	24	56	0	0	0	0	0	0	0	0	11751	31	4658028	22234400	31	6
AOR_flye_def	flye	def	none	AOR	flye	def	flye_def_none_contig924	contig924	d__Bacteria;p__Patescibacteria	d__Bacteria	p__Patescibacteria	k__Bacteria (UID1452)	924	151	101	78	73	0	0	0	0	44.07	0	0	1437434	31	4658028	22234400	31	6
AOR_flye_def	flye	def	none	AOR	flye	def	flye_def_none_contig933	contig933	d__Bacteria;p__Bacteroidota	d__Bacteria	p__Bacteroidota	p__Bacteroidetes (UID2605)	350	316	210	92	217	6	1	0	0	64.92	1.98	0	3168685	31	4658028	22234400	31	6
AOR_flye_def	flye	def	none	AOR	flye	def	flye_def_none_contig937	contig937	NA	NA	NA	k__Bacteria (UID203)	5449	104	58	84	20	0	0	0	0	21.59	0	0	3677982	31	4658028	22234400	31	6
AOR_flye_def	flye	def	none	AOR	flye	def	flye_def_none_contig938	contig938	NA	NA	NA	root (UID1)	5656	56	24	56	0	0	0	0	0	0	0	0	77569	31	4658028	22234400	31	6
AOR_flye_def	flye	def	none	AOR	flye	def	flye_def_none_contig94	contig94	NA	NA	NA	root (UID1)	5656	56	24	56	0	0	0	0	0	0	0	0	42098	31	4658028	22234400	31	6
AOR_flye_def	flye	def	none	AOR	flye	def	flye_def_none_contig955	contig955	NA	NA	NA	root (UID1)	5656	56	24	56	0	0	0	0	0	0	0	0	223074	31	4658028	22234400	31	6
AOR_flye_def	flye	def	none	AOR	flye	def	flye_def_none_contig963	contig963	NA	NA	NA	root (UID1)	5656	56	24	56	0	0	0	0	0	0	0	0	44027	31	4658028	22234400	31	6
AOR_flye_def	flye	def	none	AOR	flye	def	flye_def_none_contig992	contig992	NA	NA	NA	root (UID1)	5656	56	24	56	0	0	0	0	0	0	0	0	13867	31	4658028	22234400	31	6
AOR_Tryc_subcanu_sample01	tryc	subcanu	sample01	AOR	canu	sub	tryc_subcanu_sample01_tig00000001	tig00000001	NA	NA	NA	k__Bacteria (UID2565)	2921	143	88	112	30	1	0	0	0	17.97	0.38	0	4970451	9	4970451	14355106	9	3
AOR_Tryc_subcanu_sample01	tryc	subcanu	sample01	AOR	canu	sub	tryc_subcanu_sample01_tig00000003	tig00000003	d__Bacteria;p__Chloroflexota	d__Bacteria	p__Chloroflexota	k__Bacteria (UID1452)	924	163	110	78	84	1	0	0	0	46.1	0.91	0	4639859	9	4970451	14355106	9	3
AOR_Tryc_subcanu_sample01	tryc	subcanu	sample01	AOR	canu	sub	tryc_subcanu_sample01_tig00000004	tig00000004	d__Bacteria;p__Proteobacteria	d__Bacteria	p__Proteobacteria	o__Rhizobiales (UID3447)	356	408	244	266	142	0	0	0	0	36.19	0	0	4240901	9	4970451	14355106	9	3
AOR_Tryc_subcanu_sample01	tryc	subcanu	sample01	AOR	canu	sub	tryc_subcanu_sample01_tig00000271	tig00000271	NA	NA	NA	root (UID1)	5656	56	24	56	0	0	0	0	0	0	0	0	115630	9	4970451	14355106	9	3
AOR_Tryc_subcanu_sample01	tryc	subcanu	sample01	AOR	canu	sub	tryc_subcanu_sample01_tig00000784	tig00000784	NA	NA	NA	root (UID1)	5656	56	24	56	0	0	0	0	0	0	0	0	25698	9	4970451	14355106	9	3
AOR_Tryc_subcanu_sample01	tryc	subcanu	sample01	AOR	canu	sub	tryc_subcanu_sample01_tig00001087	tig00001087	NA	NA	NA	root (UID1)	5656	56	24	56	0	0	0	0	0	0	0	0	14356	9	4970451	14355106	9	3
AOR_Tryc_subcanu_sample01	tryc	subcanu	sample01	AOR	canu	sub	tryc_subcanu_sample01_tig00059079	tig00059079	NA	NA	NA	root (UID1)	5656	56	24	56	0	0	0	0	0	0	0	0	240683	9	4970451	14355106	9	3
AOR_Tryc_subcanu_sample01	tryc	subcanu	sample01	AOR	canu	sub	tryc_subcanu_sample01_tig00059089	tig00059089	NA	NA	NA	root (UID1)	5656	56	24	56	0	0	0	0	0	0	0	0	90266	9	4970451	14355106	9	3
AOR_Tryc_subcanu_sample01	tryc	subcanu	sample01	AOR	canu	sub	tryc_subcanu_sample01_tig00059119	tig00059119	NA	NA	NA	root (UID1)	5656	56	24	56	0	0	0	0	0	0	0	0	17262	9	4970451	14355106	9	3
AOR_Tryc_subcanu_sample02	tryc	subcanu	sample02	AOR	canu	sub	tryc_subcanu_sample02_tig00000007	tig00000007	d__Bacteria;p__Chloroflexota	d__Bacteria	p__Chloroflexota	k__Bacteria (UID1452)	924	163	110	100	62	1	0	0	0	31.27	0.91	0	4642667	6	4642667	5146626	6	1
AOR_Tryc_subcanu_sample02	tryc	subcanu	sample02	AOR	canu	sub	tryc_subcanu_sample02_tig00000176	tig00000176	NA	NA	NA	root (UID1)	5656	56	24	56	0	0	0	0	0	0	0	0	240621	6	4642667	5146626	6	1
AOR_Tryc_subcanu_sample02	tryc	subcanu	sample02	AOR	canu	sub	tryc_subcanu_sample02_tig00000259	tig00000259	NA	NA	NA	root (UID1)	5656	56	24	56	0	0	0	0	0	0	0	0	117337	6	4642667	5146626	6	1
AOR_Tryc_subcanu_sample02	tryc	subcanu	sample02	AOR	canu	sub	tryc_subcanu_sample02_tig00000372	tig00000372	NA	NA	NA	root (UID1)	5656	56	24	56	0	0	0	0	0	0	0	0	83440	6	4642667	5146626	6	1
AOR_Tryc_subcanu_sample02	tryc	subcanu	sample02	AOR	canu	sub	tryc_subcanu_sample02_tig00000446	tig00000446	NA	NA	NA	k__Bacteria (UID203)	5449	103	57	98	4	1	0	0	0	0.99	0.16	100	45123	6	4642667	5146626	6	1
AOR_Tryc_subcanu_sample02	tryc	subcanu	sample02	AOR	canu	sub	tryc_subcanu_sample02_tig00001351	tig00001351	NA	NA	NA	root (UID1)	5656	56	24	56	0	0	0	0	0	0	0	0	17438	6	4642667	5146626	6	1
AOR_Tryc_subcanu_sample03	tryc	subcanu	sample03	AOR	canu	sub	tryc_subcanu_sample03_tig00000008	tig00000008	d__Bacteria;p__Chloroflexota	d__Bacteria	p__Chloroflexota	k__Bacteria (UID1452)	924	163	110	97	66	0	0	0	0	34.07	0	0	4642302	9	4642302	10954962	9	3
AOR_Tryc_subcanu_sample03	tryc	subcanu	sample03	AOR	canu	sub	tryc_subcanu_sample03_tig00000074	tig00000074	d__Bacteria;p__Patescibacteria	d__Bacteria	p__Patescibacteria	k__Bacteria (UID1452)	924	151	101	97	54	0	0	0	0	29.22	0	0	1431467	9	4642302	10954962	9	3
AOR_Tryc_subcanu_sample03	tryc	subcanu	sample03	AOR	canu	sub	tryc_subcanu_sample03_tig00000182	tig00000182	NA	NA	NA	root (UID1)	5656	56	24	56	0	0	0	0	0	0	0	0	233695	9	4642302	10954962	9	3
AOR_Tryc_subcanu_sample03	tryc	subcanu	sample03	AOR	canu	sub	tryc_subcanu_sample03_tig00000272	tig00000272	NA	NA	NA	root (UID1)	5656	56	24	56	0	0	0	0	0	0	0	0	140086	9	4642302	10954962	9	3
AOR_Tryc_subcanu_sample03	tryc	subcanu	sample03	AOR	canu	sub	tryc_subcanu_sample03_tig00000402	tig00000402	NA	NA	NA	root (UID1)	5656	56	24	56	0	0	0	0	0	0	0	0	83557	9	4642302	10954962	9	3
AOR_Tryc_subcanu_sample03	tryc	subcanu	sample03	AOR	canu	sub	tryc_subcanu_sample03_tig00000507	tig00000507	NA	NA	NA	k__Bacteria (UID203)	5449	103	57	100	3	0	0	0	0	0.48	0	0	44921	9	4642302	10954962	9	3
AOR_Tryc_subcanu_sample03	tryc	subcanu	sample03	AOR	canu	sub	tryc_subcanu_sample03_tig00000874	tig00000874	NA	NA	NA	root (UID1)	5656	56	24	56	0	0	0	0	0	0	0	0	25717	9	4642302	10954962	9	3
AOR_Tryc_subcanu_sample03	tryc	subcanu	sample03	AOR	canu	sub	tryc_subcanu_sample03_tig00001058	tig00001058	NA	NA	NA	root (UID1)	5656	56	24	56	0	0	0	0	0	0	0	0	14346	9	4642302	10954962	9	3
AOR_Tryc_subcanu_sample03	tryc	subcanu	sample03	AOR	canu	sub	tryc_subcanu_sample03_tig00058028	tig00058028	d__Bacteria;p__Nitrospirota	d__Bacteria	p__Nitrospirota	k__Bacteria (UID3187)	2258	181	110	96	83	2	0	0	0	39.15	1.14	0	4338871	9	4642302	10954962	9	3
AOR_Tryc_subcanu_sample04	tryc	subcanu	sample04	AOR	canu	sub	tryc_subcanu_sample04_tig00000015	tig00000015	d__Bacteria;p__Chloroflexota	d__Bacteria	p__Chloroflexota	k__Bacteria (UID1452)	924	163	110	84	78	1	0	0	0	44.53	0.1	0	4642477	3	4642477	4969358	3	1
AOR_Tryc_subcanu_sample04	tryc	subcanu	sample04	AOR	canu	sub	tryc_subcanu_sample04_tig00000207	tig00000207	NA	NA	NA	root (UID1)	5656	56	24	56	0	0	0	0	0	0	0	0	233771	3	4642477	4969358	3	1
AOR_Tryc_subcanu_sample04	tryc	subcanu	sample04	AOR	canu	sub	tryc_subcanu_sample04_tig00000350	tig00000350	NA	NA	NA	root (UID1)	5656	56	24	56	0	0	0	0	0	0	0	0	93110	3	4642477	4969358	3	1
AOR_Tryc_subcanu_sample05	tryc	subcanu	sample05	AOR	canu	sub	tryc_subcanu_sample05_tig00000001	tig00000001	d__Bacteria;p__Planctomycetota	d__Bacteria	p__Planctomycetota	k__Bacteria (UID2565)	2921	143	88	102	41	0	0	0	0	23.89	0	0	4970728	7	4970728	5526882	7	1
AOR_Tryc_subcanu_sample05	tryc	subcanu	sample05	AOR	canu	sub	tryc_subcanu_sample05_tig00000204	tig00000204	NA	NA	NA	root (UID1)	5656	56	24	56	0	0	0	0	0	0	0	0	267937	7	4970728	5526882	7	1
AOR_Tryc_subcanu_sample05	tryc	subcanu	sample05	AOR	canu	sub	tryc_subcanu_sample05_tig00000491	tig00000491	NA	NA	NA	k__Bacteria (UID203)	5449	103	57	99	4	0	0	0	0	1.36	0	0	44650	7	4970728	5526882	7	1
AOR_Tryc_subcanu_sample05	tryc	subcanu	sample05	AOR	canu	sub	tryc_subcanu_sample05_tig00001918	tig00001918	NA	NA	NA	root (UID1)	5656	56	24	56	0	0	0	0	0	0	0	0	11207	7	4970728	5526882	7	1
AOR_Tryc_subcanu_sample05	tryc	subcanu	sample05	AOR	canu	sub	tryc_subcanu_sample05_tig00002583	tig00002583	NA	NA	NA	root (UID1)	5656	56	24	56	0	0	0	0	0	0	0	0	9464	7	4970728	5526882	7	1
AOR_Tryc_subcanu_sample05	tryc	subcanu	sample05	AOR	canu	sub	tryc_subcanu_sample05_tig00013748	tig00013748	NA	NA	NA	root (UID1)	5656	56	24	56	0	0	0	0	0	0	0	0	116221	7	4970728	5526882	7	1
AOR_Tryc_subcanu_sample05	tryc	subcanu	sample05	AOR	canu	sub	tryc_subcanu_sample05_tig00059497	tig00059497	NA	NA	NA	root (UID1)	5656	56	24	56	0	0	0	0	0	0	0	0	106675	7	4970728	5526882	7	1
AOR_Tryc_subcanu_sample06	tryc	subcanu	sample06	AOR	canu	sub	tryc_subcanu_sample06_tig00000002	tig00000002	d__Bacteria;p__Nitrospirota	d__Bacteria	p__Nitrospirota	k__Bacteria (UID3187)	2258	181	110	94	84	3	0	0	0	45.57	1.19	0	4302842	10	4631170	9602940	10	2
AOR_Tryc_subcanu_sample06	tryc	subcanu	sample06	AOR	canu	sub	tryc_subcanu_sample06_tig00000003	tig00000003	d__Bacteria;p__Chloroflexota	d__Bacteria	p__Chloroflexota	k__Bacteria (UID1452)	924	163	110	103	60	0	0	0	0	32.76	0	0	4631170	10	4631170	9602940	10	2
AOR_Tryc_subcanu_sample06	tryc	subcanu	sample06	AOR	canu	sub	tryc_subcanu_sample06_tig00000180	tig00000180	NA	NA	NA	root (UID1)	5656	56	24	56	0	0	0	0	0	0	0	0	256364	10	4631170	9602940	10	2
AOR_Tryc_subcanu_sample06	tryc	subcanu	sample06	AOR	canu	sub	tryc_subcanu_sample06_tig00000215	tig00000215	NA	NA	NA	root (UID1)	5656	56	24	56	0	0	0	0	0	0	0	0	106971	10	4631170	9602940	10	2
AOR_Tryc_subcanu_sample06	tryc	subcanu	sample06	AOR	canu	sub	tryc_subcanu_sample06_tig00000371	tig00000371	NA	NA	NA	root (UID1)	5656	56	24	56	0	0	0	0	0	0	0	0	81606	10	4631170	9602940	10	2
AOR_Tryc_subcanu_sample06	tryc	subcanu	sample06	AOR	canu	sub	tryc_subcanu_sample06_tig00000790	tig00000790	NA	NA	NA	root (UID1)	5656	56	24	56	0	0	0	0	0	0	0	0	25735	10	4631170	9602940	10	2
AOR_Tryc_subcanu_sample06	tryc	subcanu	sample06	AOR	canu	sub	tryc_subcanu_sample06_tig00001083	tig00001083	NA	NA	NA	root (UID1)	5656	56	24	56	0	0	0	0	0	0	0	0	14388	10	4631170	9602940	10	2
AOR_Tryc_subcanu_sample06	tryc	subcanu	sample06	AOR	canu	sub	tryc_subcanu_sample06_tig00001400	tig00001400	NA	NA	NA	root (UID1)	5656	56	24	56	0	0	0	0	0	0	0	0	17314	10	4631170	9602940	10	2
AOR_Tryc_subcanu_sample06	tryc	subcanu	sample06	AOR	canu	sub	tryc_subcanu_sample06_tig00013619	tig00013619	NA	NA	NA	root (UID1)	5656	56	24	56	0	0	0	0	0	0	0	0	119157	10	4631170	9602940	10	2
AOR_Tryc_subcanu_sample06	tryc	subcanu	sample06	AOR	canu	sub	tryc_subcanu_sample06_tig00058922	tig00058922	NA	NA	NA	k__Bacteria (UID203)	5449	103	57	101	2	0	0	0	0	0.32	0	0	47393	10	4631170	9602940	10	2
AOR_Tryc_subcanu_sample07	tryc	subcanu	sample07	AOR	canu	sub	tryc_subcanu_sample07_tig00000004	tig00000004	d__Bacteria;p__Chloroflexota	d__Bacteria	p__Chloroflexota	k__Bacteria (UID1452)	924	163	110	76	85	2	0	0	0	45.05	1.01	0	4631326	7	4631326	5534172	7	1
AOR_Tryc_subcanu_sample07	tryc	subcanu	sample07	AOR	canu	sub	tryc_subcanu_sample07_tig00000197	tig00000197	NA	NA	NA	root (UID1)	5656	56	24	56	0	0	0	0	0	0	0	0	251428	7	4631326	5534172	7	1
AOR_Tryc_subcanu_sample07	tryc	subcanu	sample07	AOR	canu	sub	tryc_subcanu_sample07_tig00000207	tig00000207	NA	NA	NA	root (UID1)	5656	56	24	56	0	0	0	0	0	0	0	0	227898	7	4631326	5534172	7	1
AOR_Tryc_subcanu_sample07	tryc	subcanu	sample07	AOR	canu	sub	tryc_subcanu_sample07_tig00000328	tig00000328	NA	NA	NA	root (UID1)	5656	56	24	56	0	0	0	0	0	0	0	0	115643	7	4631326	5534172	7	1
AOR_Tryc_subcanu_sample07	tryc	subcanu	sample07	AOR	canu	sub	tryc_subcanu_sample07_tig00058621	tig00058621	NA	NA	NA	root (UID1)	5656	56	24	56	0	0	0	0	0	0	0	0	121118	7	4631326	5534172	7	1
AOR_Tryc_subcanu_sample07	tryc	subcanu	sample07	AOR	canu	sub	tryc_subcanu_sample07_tig00058623	tig00058623	NA	NA	NA	root (UID1)	5656	56	24	56	0	0	0	0	0	0	0	0	139415	7	4631326	5534172	7	1
AOR_Tryc_subcanu_sample07	tryc	subcanu	sample07	AOR	canu	sub	tryc_subcanu_sample07_tig00058633	tig00058633	NA	NA	NA	k__Bacteria (UID203)	5449	103	57	100	3	0	0	0	0	0.48	0	0	47344	7	4631326	5534172	7	1
AOR_Tryc_subcanu_sample08	tryc	subcanu	sample08	AOR	canu	sub	tryc_subcanu_sample08_tig00000003	tig00000003	d__Bacteria;p__Nitrospirota	d__Bacteria	p__Nitrospirota	k__Bacteria (UID3187)	2258	181	110	102	74	5	0	0	0	33.04	3.01	0	4303147	9	4641370	9618177	9	2
AOR_Tryc_subcanu_sample08	tryc	subcanu	sample08	AOR	canu	sub	tryc_subcanu_sample08_tig00000158	tig00000158	NA	NA	NA	root (UID1)	5656	56	24	56	0	0	0	0	0	0	0	0	253923	9	4641370	9618177	9	2
AOR_Tryc_subcanu_sample08	tryc	subcanu	sample08	AOR	canu	sub	tryc_subcanu_sample08_tig00000215	tig00000215	NA	NA	NA	root (UID1)	5656	56	24	56	0	0	0	0	0	0	0	0	106936	9	4641370	9618177	9	2
AOR_Tryc_subcanu_sample08	tryc	subcanu	sample08	AOR	canu	sub	tryc_subcanu_sample08_tig00000566	tig00000566	NA	NA	NA	k__Bacteria (UID203)	5449	103	57	97	6	0	0	0	0	1.67	0	0	45008	9	4641370	9618177	9	2
AOR_Tryc_subcanu_sample08	tryc	subcanu	sample08	AOR	canu	sub	tryc_subcanu_sample08_tig00001853	tig00001853	NA	NA	NA	root (UID1)	5656	56	24	56	0	0	0	0	0	0	0	0	14269	9	4641370	9618177	9	2
AOR_Tryc_subcanu_sample08	tryc	subcanu	sample08	AOR	canu	sub	tryc_subcanu_sample08_tig00004166	tig00004166	NA	NA	NA	root (UID1)	5656	56	24	56	0	0	0	0	0	0	0	0	11325	9	4641370	9618177	9	2
AOR_Tryc_subcanu_sample08	tryc	subcanu	sample08	AOR	canu	sub	tryc_subcanu_sample08_tig00058962	tig00058962	d__Bacteria;p__Chloroflexota	d__Bacteria	p__Chloroflexota	k__Bacteria (UID1452)	924	163	110	69	91	3	0	0	0	53.09	1.92	0	4641370	9	4641370	9618177	9	2
AOR_Tryc_subcanu_sample08	tryc	subcanu	sample08	AOR	canu	sub	tryc_subcanu_sample08_tig00058966	tig00058966	NA	NA	NA	root (UID1)	5656	56	24	56	0	0	0	0	0	0	0	0	227441	9	4641370	9618177	9	2
AOR_Tryc_subcanu_sample08	tryc	subcanu	sample08	AOR	canu	sub	tryc_subcanu_sample08_tig00058994	tig00058994	NA	NA	NA	root (UID1)	5656	56	24	56	0	0	0	0	0	0	0	0	14758	9	4641370	9618177	9	2
AOR_Tryc_subcanu_sample09	tryc	subcanu	sample09	AOR	canu	sub	tryc_subcanu_sample09_tig00000193	tig00000193	NA	NA	NA	root (UID1)	5656	56	24	56	0	0	0	0	0	0	0	0	233905	8	4641289	5344192	8	1
AOR_Tryc_subcanu_sample09	tryc	subcanu	sample09	AOR	canu	sub	tryc_subcanu_sample09_tig00000224	tig00000224	NA	NA	NA	root (UID1)	5656	56	24	56	0	0	0	0	0	0	0	0	106890	8	4641289	5344192	8	1
AOR_Tryc_subcanu_sample09	tryc	subcanu	sample09	AOR	canu	sub	tryc_subcanu_sample09_tig00000250	tig00000250	NA	NA	NA	root (UID1)	5656	56	24	56	0	0	0	0	0	0	0	0	117333	8	4641289	5344192	8	1
AOR_Tryc_subcanu_sample09	tryc	subcanu	sample09	AOR	canu	sub	tryc_subcanu_sample09_tig00000379	tig00000379	NA	NA	NA	root (UID1)	5656	56	24	56	0	0	0	0	0	0	0	0	83628	8	4641289	5344192	8	1
AOR_Tryc_subcanu_sample09	tryc	subcanu	sample09	AOR	canu	sub	tryc_subcanu_sample09_tig00000484	tig00000484	NA	NA	NA	k__Bacteria (UID203)	5449	103	57	99	4	0	0	0	0	1.36	0	0	45068	8	4641289	5344192	8	1
AOR_Tryc_subcanu_sample09	tryc	subcanu	sample09	AOR	canu	sub	tryc_subcanu_sample09_tig00000795	tig00000795	NA	NA	NA	root (UID1)	5656	56	24	56	0	0	0	0	0	0	0	0	25757	8	4641289	5344192	8	1
AOR_Tryc_subcanu_sample09	tryc	subcanu	sample09	AOR	canu	sub	tryc_subcanu_sample09_tig00059353	tig00059353	d__Bacteria;p__Chloroflexota	d__Bacteria	p__Chloroflexota	k__Bacteria (UID1452)	924	163	110	95	68	0	0	0	0	36.51	0	0	4641289	8	4641289	5344192	8	1
AOR_Tryc_subcanu_sample09	tryc	subcanu	sample09	AOR	canu	sub	tryc_subcanu_sample09_tig00059365	tig00059365	NA	NA	NA	root (UID1)	5656	56	24	56	0	0	0	0	0	0	0	0	90322	8	4641289	5344192	8	1
AOR_Tryc_subcanu_sample11	tryc	subcanu	sample11	AOR	canu	sub	tryc_subcanu_sample11_tig00000003	tig00000003	d__Bacteria;p__Chloroflexota	d__Bacteria	p__Chloroflexota	k__Bacteria (UID1452)	924	163	110	108	55	0	0	0	0	30.77	0	0	4649729	7	4968147	11337408	7	3
AOR_Tryc_subcanu_sample11	tryc	subcanu	sample11	AOR	canu	sub	tryc_subcanu_sample11_tig00000079	tig00000079	NA	NA	NA	k__Bacteria (UID1452)	924	151	101	114	37	0	0	0	0	21.53	0	0	1436126	7	4968147	11337408	7	3
AOR_Tryc_subcanu_sample11	tryc	subcanu	sample11	AOR	canu	sub	tryc_subcanu_sample11_tig00000268	tig00000268	NA	NA	NA	root (UID1)	5656	56	24	56	0	0	0	0	0	0	0	0	117390	7	4968147	11337408	7	3
AOR_Tryc_subcanu_sample11	tryc	subcanu	sample11	AOR	canu	sub	tryc_subcanu_sample11_tig00000480	tig00000480	NA	NA	NA	k__Bacteria (UID203)	5449	103	57	98	5	0	0	0	0	0.99	0	0	45149	7	4968147	11337408	7	3
AOR_Tryc_subcanu_sample11	tryc	subcanu	sample11	AOR	canu	sub	tryc_subcanu_sample11_tig00013701	tig00013701	d__Bacteria;p__Planctomycetota	d__Bacteria	p__Planctomycetota	k__Bacteria (UID2565)	2921	143	88	105	38	0	0	0	0	22.19	0	0	4968147	7	4968147	11337408	7	3
AOR_Tryc_subcanu_sample11	tryc	subcanu	sample11	AOR	canu	sub	tryc_subcanu_sample11_tig00013762	tig00013762	NA	NA	NA	root (UID1)	5656	56	24	56	0	0	0	0	0	0	0	0	103598	7	4968147	11337408	7	3
AOR_Tryc_subcanu_sample11	tryc	subcanu	sample11	AOR	canu	sub	tryc_subcanu_sample11_tig00059204	tig00059204	NA	NA	NA	root (UID1)	5656	56	24	56	0	0	0	0	0	0	0	0	17269	7	4968147	11337408	7	3
AOR_Tryc_subcanu_sample12	tryc	subcanu	sample12	AOR	canu	sub	tryc_subcanu_sample12_tig00000004	tig00000004	d__Bacteria;p__Chloroflexota	d__Bacteria	p__Chloroflexota	k__Bacteria (UID1452)	924	163	110	108	55	0	0	0	0	30.98	0	0	4649277	8	4967792	14439314	8	3
AOR_Tryc_subcanu_sample12	tryc	subcanu	sample12	AOR	canu	sub	tryc_subcanu_sample12_tig00000005	tig00000005	d__Bacteria;p__Proteobacteria	d__Bacteria	p__Proteobacteria	o__Rhizobiales (UID3447)	356	408	244	230	178	0	0	0	0	39.6	0	0	4238220	8	4967792	14439314	8	3
AOR_Tryc_subcanu_sample12	tryc	subcanu	sample12	AOR	canu	sub	tryc_subcanu_sample12_tig00000187	tig00000187	NA	NA	NA	root (UID1)	5656	56	24	56	0	0	0	0	0	0	0	0	233573	8	4967792	14439314	8	3
AOR_Tryc_subcanu_sample12	tryc	subcanu	sample12	AOR	canu	sub	tryc_subcanu_sample12_tig00000276	tig00000276	NA	NA	NA	root (UID1)	5656	56	24	56	0	0	0	0	0	0	0	0	113060	8	4967792	14439314	8	3
AOR_Tryc_subcanu_sample12	tryc	subcanu	sample12	AOR	canu	sub	tryc_subcanu_sample12_tig00000302	tig00000302	NA	NA	NA	root (UID1)	5656	56	24	56	0	0	0	0	0	0	0	0	118131	8	4967792	14439314	8	3
AOR_Tryc_subcanu_sample12	tryc	subcanu	sample12	AOR	canu	sub	tryc_subcanu_sample12_tig00013672	tig00013672	NA	NA	NA	k__Bacteria (UID2565)	2921	143	88	108	35	0	0	0	0	19.88	0	0	4967792	8	4967792	14439314	8	3
AOR_Tryc_subcanu_sample12	tryc	subcanu	sample12	AOR	canu	sub	tryc_subcanu_sample12_tig00013724	tig00013724	NA	NA	NA	root (UID1)	5656	56	24	56	0	0	0	0	0	0	0	0	102001	8	4967792	14439314	8	3
AOR_Tryc_subcanu_sample12	tryc	subcanu	sample12	AOR	canu	sub	tryc_subcanu_sample12_tig00058943	tig00058943	NA	NA	NA	root (UID1)	5656	56	24	56	0	0	0	0	0	0	0	0	17260	8	4967792	14439314	8	3
AOR_Tryc_subflye_sample01	tryc	subflye	sample01	AOR	flye	sub	tryc_subflye_sample01_contig1001	contig1001	NA	NA	NA	root (UID1)	5656	56	24	56	0	0	0	0	0	0	0	0	7574	42	4997451	27965090	42	7
AOR_Tryc_subflye_sample01	tryc	subflye	sample01	AOR	flye	sub	tryc_subflye_sample01_contig1022	contig1022	NA	NA	NA	root (UID1)	5656	56	24	56	0	0	0	0	0	0	0	0	77577	42	4997451	27965090	42	7
AOR_Tryc_subflye_sample01	tryc	subflye	sample01	AOR	flye	sub	tryc_subflye_sample01_contig1023	contig1023	NA	NA	NA	root (UID1)	5656	56	24	56	0	0	0	0	0	0	0	0	20322	42	4997451	27965090	42	7
AOR_Tryc_subflye_sample01	tryc	subflye	sample01	AOR	flye	sub	tryc_subflye_sample01_contig1034	contig1034	NA	NA	NA	root (UID1)	5656	56	24	56	0	0	0	0	0	0	0	0	5877	42	4997451	27965090	42	7
AOR_Tryc_subflye_sample01	tryc	subflye	sample01	AOR	flye	sub	tryc_subflye_sample01_contig1057	contig1057	NA	NA	NA	root (UID1)	5656	56	24	56	0	0	0	0	0	0	0	0	4163	42	4997451	27965090	42	7
AOR_Tryc_subflye_sample01	tryc	subflye	sample01	AOR	flye	sub	tryc_subflye_sample01_contig1112	contig1112	NA	NA	NA	root (UID1)	5656	56	24	56	0	0	0	0	0	0	0	0	540	42	4997451	27965090	42	7
AOR_Tryc_subflye_sample01	tryc	subflye	sample01	AOR	flye	sub	tryc_subflye_sample01_contig1269	contig1269	NA	NA	NA	root (UID1)	5656	56	24	56	0	0	0	0	0	0	0	0	6579	42	4997451	27965090	42	7
AOR_Tryc_subflye_sample01	tryc	subflye	sample01	AOR	flye	sub	tryc_subflye_sample01_contig1270	contig1270	NA	NA	NA	root (UID1)	5656	56	24	56	0	0	0	0	0	0	0	0	4005	42	4997451	27965090	42	7
AOR_Tryc_subflye_sample01	tryc	subflye	sample01	AOR	flye	sub	tryc_subflye_sample01_contig1535	contig1535	NA	NA	NA	root (UID1)	5656	56	24	56	0	0	0	0	0	0	0	0	6014	42	4997451	27965090	42	7
AOR_Tryc_subflye_sample01	tryc	subflye	sample01	AOR	flye	sub	tryc_subflye_sample01_contig1547	contig1547	NA	NA	NA	root (UID1)	5656	56	24	56	0	0	0	0	0	0	0	0	223091	42	4997451	27965090	42	7
AOR_Tryc_subflye_sample01	tryc	subflye	sample01	AOR	flye	sub	tryc_subflye_sample01_contig1551	contig1551	NA	NA	NA	root (UID1)	5656	56	24	56	0	0	0	0	0	0	0	0	21603	42	4997451	27965090	42	7
AOR_Tryc_subflye_sample01	tryc	subflye	sample01	AOR	flye	sub	tryc_subflye_sample01_contig1593	contig1593	NA	NA	NA	root (UID1)	5656	56	24	56	0	0	0	0	0	0	0	0	44015	42	4997451	27965090	42	7
AOR_Tryc_subflye_sample01	tryc	subflye	sample01	AOR	flye	sub	tryc_subflye_sample01_contig1594	contig1594	NA	NA	NA	root (UID1)	5656	56	24	56	0	0	0	0	0	0	0	0	18221	42	4997451	27965090	42	7
AOR_Tryc_subflye_sample01	tryc	subflye	sample01	AOR	flye	sub	tryc_subflye_sample01_contig1599	contig1599	NA	NA	NA	k__Bacteria (UID203)	5449	103	57	96	7	0	0	0	0	2.22	0	0	39086	42	4997451	27965090	42	7
AOR_Tryc_subflye_sample01	tryc	subflye	sample01	AOR	flye	sub	tryc_subflye_sample01_contig1610	contig1610	NA	NA	NA	root (UID1)	5656	56	24	56	0	0	0	0	0	0	0	0	22380	42	4997451	27965090	42	7
AOR_Tryc_subflye_sample01	tryc	subflye	sample01	AOR	flye	sub	tryc_subflye_sample01_contig1618	contig1618	NA	NA	NA	root (UID1)	5656	56	24	56	0	0	0	0	0	0	0	0	23193	42	4997451	27965090	42	7
AOR_Tryc_subflye_sample01	tryc	subflye	sample01	AOR	flye	sub	tryc_subflye_sample01_contig1620	contig1620	NA	NA	NA	root (UID1)	5656	56	24	56	0	0	0	0	0	0	0	0	19677	42	4997451	27965090	42	7
AOR_Tryc_subflye_sample01	tryc	subflye	sample01	AOR	flye	sub	tryc_subflye_sample01_contig1621	contig1621	NA	NA	NA	root (UID1)	5656	56	24	56	0	0	0	0	0	0	0	0	11345	42	4997451	27965090	42	7
AOR_Tryc_subflye_sample01	tryc	subflye	sample01	AOR	flye	sub	tryc_subflye_sample01_contig194	contig194	NA	NA	NA	root (UID1)	5656	56	24	56	0	0	0	0	0	0	0	0	130016	42	4997451	27965090	42	7
AOR_Tryc_subflye_sample01	tryc	subflye	sample01	AOR	flye	sub	tryc_subflye_sample01_contig251	contig251	d__Bacteria;p__Bacteroidota	d__Bacteria	p__Bacteroidota	p__Bacteroidetes (UID2605)	350	316	210	108	201	6	1	0	0	58.33	2.22	0	3179139	42	4997451	27965090	42	7
AOR_Tryc_subflye_sample01	tryc	subflye	sample01	AOR	flye	sub	tryc_subflye_sample01_contig289	contig289	d__Bacteria;p__Chloroflexota	d__Bacteria	p__Chloroflexota	k__Bacteria (UID1452)	924	163	110	46	117	0	0	0	0	67.12	0	0	4657491	42	4997451	27965090	42	7
AOR_Tryc_subflye_sample01	tryc	subflye	sample01	AOR	flye	sub	tryc_subflye_sample01_contig371	contig371	NA	NA	NA	c__Betaproteobacteria (UID3959)	235	413	209	362	50	1	0	0	0	7.64	0.48	0	418086	42	4997451	27965090	42	7
AOR_Tryc_subflye_sample01	tryc	subflye	sample01	AOR	flye	sub	tryc_subflye_sample01_contig381	contig381	NA	NA	NA	k__Bacteria (UID203)	5449	104	58	101	3	0	0	0	0	0.89	0	0	3677410	42	4997451	27965090	42	7
AOR_Tryc_subflye_sample01	tryc	subflye	sample01	AOR	flye	sub	tryc_subflye_sample01_contig398	contig398	NA	NA	NA	root (UID1)	5656	56	24	56	0	0	0	0	0	0	0	0	4908	42	4997451	27965090	42	7
AOR_Tryc_subflye_sample01	tryc	subflye	sample01	AOR	flye	sub	tryc_subflye_sample01_contig42	contig42	d__Bacteria;p__Nitrospirota	d__Bacteria	p__Nitrospirota	k__Bacteria (UID3187)	2258	181	110	37	140	4	0	0	0	75.47	2.95	0	4339990	42	4997451	27965090	42	7
AOR_Tryc_subflye_sample01	tryc	subflye	sample01	AOR	flye	sub	tryc_subflye_sample01_contig424	contig424	d__Bacteria;p__Proteobacteria	d__Bacteria	p__Proteobacteria	o__Rhizobiales (UID3447)	356	408	244	61	347	0	0	0	0	83.37	0	0	4243564	42	4997451	27965090	42	7
AOR_Tryc_subflye_sample01	tryc	subflye	sample01	AOR	flye	sub	tryc_subflye_sample01_contig437	contig437	NA	NA	NA	root (UID1)	5656	56	24	56	0	0	0	0	0	0	0	0	11757	42	4997451	27965090	42	7
AOR_Tryc_subflye_sample01	tryc	subflye	sample01	AOR	flye	sub	tryc_subflye_sample01_contig462	contig462	NA	NA	NA	root (UID1)	5656	56	24	56	0	0	0	0	0	0	0	0	648	42	4997451	27965090	42	7
AOR_Tryc_subflye_sample01	tryc	subflye	sample01	AOR	flye	sub	tryc_subflye_sample01_contig474	contig474	NA	NA	NA	root (UID1)	5656	56	24	56	0	0	0	0	0	0	0	0	112115	42	4997451	27965090	42	7
AOR_Tryc_subflye_sample01	tryc	subflye	sample01	AOR	flye	sub	tryc_subflye_sample01_contig505	contig505	NA	NA	NA	root (UID1)	5656	56	24	56	0	0	0	0	0	0	0	0	3828	42	4997451	27965090	42	7
AOR_Tryc_subflye_sample01	tryc	subflye	sample01	AOR	flye	sub	tryc_subflye_sample01_contig56	contig56	d__Bacteria;p__Planctomycetota	d__Bacteria	p__Planctomycetota	k__Bacteria (UID2565)	2921	143	88	38	105	0	0	0	0	67.44	0	0	4997451	42	4997451	27965090	42	7
AOR_Tryc_subflye_sample01	tryc	subflye	sample01	AOR	flye	sub	tryc_subflye_sample01_contig57	contig57	NA	NA	NA	root (UID1)	5656	56	24	56	0	0	0	0	0	0	0	0	14443	42	4997451	27965090	42	7
AOR_Tryc_subflye_sample01	tryc	subflye	sample01	AOR	flye	sub	tryc_subflye_sample01_contig600	contig600	NA	NA	NA	root (UID1)	5656	56	24	56	0	0	0	0	0	0	0	0	4268	42	4997451	27965090	42	7
AOR_Tryc_subflye_sample01	tryc	subflye	sample01	AOR	flye	sub	tryc_subflye_sample01_contig691	contig691	NA	NA	NA	root (UID1)	5656	56	24	56	0	0	0	0	0	0	0	0	41417	42	4997451	27965090	42	7
AOR_Tryc_subflye_sample01	tryc	subflye	sample01	AOR	flye	sub	tryc_subflye_sample01_contig696	contig696	d__Bacteria;p__Patescibacteria	d__Bacteria	p__Patescibacteria	k__Bacteria (UID1452)	924	151	101	93	58	0	0	0	0	30.61	0	0	1437430	42	4997451	27965090	42	7
AOR_Tryc_subflye_sample01	tryc	subflye	sample01	AOR	flye	sub	tryc_subflye_sample01_contig753	contig753	NA	NA	NA	root (UID1)	5656	56	24	56	0	0	0	0	0	0	0	0	40498	42	4997451	27965090	42	7
AOR_Tryc_subflye_sample01	tryc	subflye	sample01	AOR	flye	sub	tryc_subflye_sample01_contig819	contig819	NA	NA	NA	root (UID1)	5656	56	24	56	0	0	0	0	0	0	0	0	14625	42	4997451	27965090	42	7
AOR_Tryc_subflye_sample01	tryc	subflye	sample01	AOR	flye	sub	tryc_subflye_sample01_contig824	contig824	NA	NA	NA	root (UID1)	5656	56	24	56	0	0	0	0	0	0	0	0	9009	42	4997451	27965090	42	7
AOR_Tryc_subflye_sample01	tryc	subflye	sample01	AOR	flye	sub	tryc_subflye_sample01_contig929	contig929	NA	NA	NA	root (UID1)	5656	56	24	56	0	0	0	0	0	0	0	0	8269	42	4997451	27965090	42	7
AOR_Tryc_subflye_sample01	tryc	subflye	sample01	AOR	flye	sub	tryc_subflye_sample01_contig943	contig943	NA	NA	NA	root (UID1)	5656	56	24	56	0	0	0	0	0	0	0	0	35442	42	4997451	27965090	42	7
AOR_Tryc_subflye_sample01	tryc	subflye	sample01	AOR	flye	sub	tryc_subflye_sample01_contig944	contig944	NA	NA	NA	root (UID1)	5656	56	24	56	0	0	0	0	0	0	0	0	18074	42	4997451	27965090	42	7
AOR_Tryc_subflye_sample01	tryc	subflye	sample01	AOR	flye	sub	tryc_subflye_sample01_contig958	contig958	NA	NA	NA	root (UID1)	5656	56	24	56	0	0	0	0	0	0	0	0	9950	42	4997451	27965090	42	7
AOR_Tryc_subflye_sample02	tryc	subflye	sample02	AOR	flye	sub	tryc_subflye_sample02_contig1	contig1	d__Bacteria;p__Planctomycetota	d__Bacteria	p__Planctomycetota	k__Bacteria (UID2565)	2921	143	88	33	109	1	0	0	0	68.29	0.07	0	4997518	44	4997518	24576645	44	6
AOR_Tryc_subflye_sample02	tryc	subflye	sample02	AOR	flye	sub	tryc_subflye_sample02_contig101	contig101	NA	NA	NA	root (UID1)	5656	56	24	56	0	0	0	0	0	0	0	0	83828	44	4997518	24576645	44	6
AOR_Tryc_subflye_sample02	tryc	subflye	sample02	AOR	flye	sub	tryc_subflye_sample02_contig1017	contig1017	NA	NA	NA	root (UID1)	5656	56	24	56	0	0	0	0	0	0	0	0	130101	44	4997518	24576645	44	6
AOR_Tryc_subflye_sample02	tryc	subflye	sample02	AOR	flye	sub	tryc_subflye_sample02_contig1026	contig1026	NA	NA	NA	root (UID1)	5656	56	24	56	0	0	0	0	0	0	0	0	34734	44	4997518	24576645	44	6
AOR_Tryc_subflye_sample02	tryc	subflye	sample02	AOR	flye	sub	tryc_subflye_sample02_contig1052	contig1052	NA	NA	NA	root (UID1)	5656	56	24	56	0	0	0	0	0	0	0	0	4267	44	4997518	24576645	44	6
AOR_Tryc_subflye_sample02	tryc	subflye	sample02	AOR	flye	sub	tryc_subflye_sample02_contig111	contig111	d__Bacteria;p__Proteobacteria	d__Bacteria	p__Proteobacteria	o__Rhizobiales (UID3447)	356	408	244	408	0	0	0	0	0	0	0	0	4243480	44	4997518	24576645	44	6
AOR_Tryc_subflye_sample02	tryc	subflye	sample02	AOR	flye	sub	tryc_subflye_sample02_contig1149	contig1149	NA	NA	NA	root (UID1)	5656	56	24	56	0	0	0	0	0	0	0	0	9373	44	4997518	24576645	44	6
AOR_Tryc_subflye_sample02	tryc	subflye	sample02	AOR	flye	sub	tryc_subflye_sample02_contig1191	contig1191	NA	NA	NA	root (UID1)	5656	56	24	56	0	0	0	0	0	0	0	0	20319	44	4997518	24576645	44	6
AOR_Tryc_subflye_sample02	tryc	subflye	sample02	AOR	flye	sub	tryc_subflye_sample02_contig1323	contig1323	NA	NA	NA	root (UID1)	5656	56	24	56	0	0	0	0	0	0	0	0	2424	44	4997518	24576645	44	6
AOR_Tryc_subflye_sample02	tryc	subflye	sample02	AOR	flye	sub	tryc_subflye_sample02_contig1356	contig1356	NA	NA	NA	root (UID1)	5656	56	24	56	0	0	0	0	0	0	0	0	6079	44	4997518	24576645	44	6
AOR_Tryc_subflye_sample02	tryc	subflye	sample02	AOR	flye	sub	tryc_subflye_sample02_contig1389	contig1389	NA	NA	NA	root (UID1)	5656	56	24	56	0	0	0	0	0	0	0	0	18337	44	4997518	24576645	44	6
AOR_Tryc_subflye_sample02	tryc	subflye	sample02	AOR	flye	sub	tryc_subflye_sample02_contig139	contig139	NA	NA	NA	root (UID1)	5656	56	24	56	0	0	0	0	0	0	0	0	41260	44	4997518	24576645	44	6
AOR_Tryc_subflye_sample02	tryc	subflye	sample02	AOR	flye	sub	tryc_subflye_sample02_contig1509	contig1509	NA	NA	NA	root (UID1)	5656	56	24	56	0	0	0	0	0	0	0	0	77630	44	4997518	24576645	44	6
AOR_Tryc_subflye_sample02	tryc	subflye	sample02	AOR	flye	sub	tryc_subflye_sample02_contig1542	contig1542	NA	NA	NA	root (UID1)	5656	56	24	56	0	0	0	0	0	0	0	0	25075	44	4997518	24576645	44	6
AOR_Tryc_subflye_sample02	tryc	subflye	sample02	AOR	flye	sub	tryc_subflye_sample02_contig1558	contig1558	NA	NA	NA	k__Bacteria (UID203)	5449	104	58	104	0	0	0	0	0	0	0	0	3679325	44	4997518	24576645	44	6
AOR_Tryc_subflye_sample02	tryc	subflye	sample02	AOR	flye	sub	tryc_subflye_sample02_contig1566	contig1566	NA	NA	NA	root (UID1)	5656	56	24	56	0	0	0	0	0	0	0	0	223110	44	4997518	24576645	44	6
AOR_Tryc_subflye_sample02	tryc	subflye	sample02	AOR	flye	sub	NA	contig1568	NA	NA	NA	NA	NA	NA	NA	NA	NA	NA	NA	NA	NA	NA	NA	NA	7000	44	4997518	24576645	44	6
AOR_Tryc_subflye_sample02	tryc	subflye	sample02	AOR	flye	sub	tryc_subflye_sample02_contig1576	contig1576	NA	NA	NA	root (UID1)	5656	56	24	56	0	0	0	0	0	0	0	0	6014	44	4997518	24576645	44	6
AOR_Tryc_subflye_sample02	tryc	subflye	sample02	AOR	flye	sub	tryc_subflye_sample02_contig1587	contig1587	NA	NA	NA	root (UID1)	5656	56	24	56	0	0	0	0	0	0	0	0	17442	44	4997518	24576645	44	6
AOR_Tryc_subflye_sample02	tryc	subflye	sample02	AOR	flye	sub	tryc_subflye_sample02_contig1596	contig1596	NA	NA	NA	k__Bacteria (UID203)	5449	103	57	95	8	0	0	0	0	1.66	0	0	39117	44	4997518	24576645	44	6
AOR_Tryc_subflye_sample02	tryc	subflye	sample02	AOR	flye	sub	tryc_subflye_sample02_contig1601	contig1601	d__Bacteria;p__Patescibacteria	d__Bacteria	p__Patescibacteria	k__Bacteria (UID1452)	924	161	108	102	59	0	0	0	0	34.29	0	0	1437194	44	4997518	24576645	44	6
AOR_Tryc_subflye_sample02	tryc	subflye	sample02	AOR	flye	sub	tryc_subflye_sample02_contig1607	contig1607	NA	NA	NA	root (UID1)	5656	56	24	56	0	0	0	0	0	0	0	0	23148	44	4997518	24576645	44	6
AOR_Tryc_subflye_sample02	tryc	subflye	sample02	AOR	flye	sub	tryc_subflye_sample02_contig1612	contig1612	NA	NA	NA	root (UID1)	5656	56	24	56	0	0	0	0	0	0	0	0	44042	44	4997518	24576645	44	6
AOR_Tryc_subflye_sample02	tryc	subflye	sample02	AOR	flye	sub	tryc_subflye_sample02_contig1615	contig1615	NA	NA	NA	k__Bacteria (UID203)	5449	104	58	94	10	0	0	0	0	4.1	0	0	26209	44	4997518	24576645	44	6
AOR_Tryc_subflye_sample02	tryc	subflye	sample02	AOR	flye	sub	tryc_subflye_sample02_contig1619	contig1619	NA	NA	NA	root (UID1)	5656	56	24	56	0	0	0	0	0	0	0	0	11359	44	4997518	24576645	44	6
AOR_Tryc_subflye_sample02	tryc	subflye	sample02	AOR	flye	sub	tryc_subflye_sample02_contig1620	contig1620	NA	NA	NA	root (UID1)	5656	56	24	56	0	0	0	0	0	0	0	0	11331	44	4997518	24576645	44	6
AOR_Tryc_subflye_sample02	tryc	subflye	sample02	AOR	flye	sub	tryc_subflye_sample02_contig185	contig185	d__Bacteria;p__Nitrospirota	d__Bacteria	p__Nitrospirota	k__Bacteria (UID3187)	2258	181	110	40	138	3	0	0	0	74.84	2.73	0	4340167	44	4997518	24576645	44	6
AOR_Tryc_subflye_sample02	tryc	subflye	sample02	AOR	flye	sub	tryc_subflye_sample02_contig247	contig247	NA	NA	NA	root (UID1)	5656	56	24	56	0	0	0	0	0	0	0	0	48332	44	4997518	24576645	44	6
AOR_Tryc_subflye_sample02	tryc	subflye	sample02	AOR	flye	sub	tryc_subflye_sample02_contig275	contig275	NA	NA	NA	root (UID1)	5656	56	24	56	0	0	0	0	0	0	0	0	5866	44	4997518	24576645	44	6
AOR_Tryc_subflye_sample02	tryc	subflye	sample02	AOR	flye	sub	tryc_subflye_sample02_contig308	contig308	NA	NA	NA	root (UID1)	5656	56	24	56	0	0	0	0	0	0	0	0	6614	44	4997518	24576645	44	6
AOR_Tryc_subflye_sample02	tryc	subflye	sample02	AOR	flye	sub	tryc_subflye_sample02_contig353	contig353	NA	NA	NA	root (UID1)	5656	56	24	56	0	0	0	0	0	0	0	0	907	44	4997518	24576645	44	6
AOR_Tryc_subflye_sample02	tryc	subflye	sample02	AOR	flye	sub	tryc_subflye_sample02_contig372	contig372	NA	NA	NA	root (UID1)	5656	56	24	56	0	0	0	0	0	0	0	0	3873	44	4997518	24576645	44	6
AOR_Tryc_subflye_sample02	tryc	subflye	sample02	AOR	flye	sub	tryc_subflye_sample02_contig381	contig381	NA	NA	NA	root (UID1)	5656	56	24	56	0	0	0	0	0	0	0	0	4514	44	4997518	24576645	44	6
AOR_Tryc_subflye_sample02	tryc	subflye	sample02	AOR	flye	sub	tryc_subflye_sample02_contig412	contig412	NA	NA	NA	root (UID1)	5656	56	24	56	0	0	0	0	0	0	0	0	9934	44	4997518	24576645	44	6
AOR_Tryc_subflye_sample02	tryc	subflye	sample02	AOR	flye	sub	tryc_subflye_sample02_contig441	contig441	NA	NA	NA	root (UID1)	5656	56	24	56	0	0	0	0	0	0	0	0	108710	44	4997518	24576645	44	6
AOR_Tryc_subflye_sample02	tryc	subflye	sample02	AOR	flye	sub	tryc_subflye_sample02_contig454	contig454	NA	NA	NA	root (UID1)	5656	56	24	56	0	0	0	0	0	0	0	0	7600	44	4997518	24576645	44	6
AOR_Tryc_subflye_sample02	tryc	subflye	sample02	AOR	flye	sub	tryc_subflye_sample02_contig469	contig469	d__Bacteria;p__Chloroflexota	d__Bacteria	p__Chloroflexota	k__Bacteria (UID1452)	924	163	110	45	118	0	0	0	0	68.73	0	0	4657538	44	4997518	24576645	44	6
AOR_Tryc_subflye_sample02	tryc	subflye	sample02	AOR	flye	sub	tryc_subflye_sample02_contig481	contig481	NA	NA	NA	root (UID1)	5656	56	24	56	0	0	0	0	0	0	0	0	3839	44	4997518	24576645	44	6
AOR_Tryc_subflye_sample02	tryc	subflye	sample02	AOR	flye	sub	tryc_subflye_sample02_contig716	contig716	NA	NA	NA	root (UID1)	5656	56	24	56	0	0	0	0	0	0	0	0	9018	44	4997518	24576645	44	6
AOR_Tryc_subflye_sample02	tryc	subflye	sample02	AOR	flye	sub	tryc_subflye_sample02_contig744	contig744	NA	NA	NA	root (UID1)	5656	56	24	56	0	0	0	0	0	0	0	0	14612	44	4997518	24576645	44	6
AOR_Tryc_subflye_sample02	tryc	subflye	sample02	AOR	flye	sub	tryc_subflye_sample02_contig811	contig811	NA	NA	NA	root (UID1)	5656	56	24	56	0	0	0	0	0	0	0	0	40507	44	4997518	24576645	44	6
AOR_Tryc_subflye_sample02	tryc	subflye	sample02	AOR	flye	sub	tryc_subflye_sample02_contig861	contig861	NA	NA	NA	root (UID1)	5656	56	24	56	0	0	0	0	0	0	0	0	41415	44	4997518	24576645	44	6
AOR_Tryc_subflye_sample02	tryc	subflye	sample02	AOR	flye	sub	tryc_subflye_sample02_contig909	contig909	NA	NA	NA	root (UID1)	5656	56	24	56	0	0	0	0	0	0	0	0	35394	44	4997518	24576645	44	6
AOR_Tryc_subflye_sample02	tryc	subflye	sample02	AOR	flye	sub	tryc_subflye_sample02_contig911	contig911	NA	NA	NA	root (UID1)	5656	56	24	56	0	0	0	0	0	0	0	0	18089	44	4997518	24576645	44	6
AOR_Tryc_subflye_sample03	tryc	subflye	sample03	AOR	flye	sub	tryc_subflye_sample03_contig1019	contig1019	NA	NA	NA	root (UID1)	5656	56	24	56	0	0	0	0	0	0	0	0	5865	44	4997313	27725624	44	7
AOR_Tryc_subflye_sample03	tryc	subflye	sample03	AOR	flye	sub	tryc_subflye_sample03_contig1041	contig1041	NA	NA	NA	root (UID1)	5656	56	24	56	0	0	0	0	0	0	0	0	20318	44	4997313	27725624	44	7
AOR_Tryc_subflye_sample03	tryc	subflye	sample03	AOR	flye	sub	tryc_subflye_sample03_contig1056	contig1056	NA	NA	NA	root (UID1)	5656	56	24	56	0	0	0	0	0	0	0	0	18084	44	4997313	27725624	44	7
AOR_Tryc_subflye_sample03	tryc	subflye	sample03	AOR	flye	sub	tryc_subflye_sample03_contig1066	contig1066	NA	NA	NA	root (UID1)	5656	56	24	56	0	0	0	0	0	0	0	0	3846	44	4997313	27725624	44	7
AOR_Tryc_subflye_sample03	tryc	subflye	sample03	AOR	flye	sub	tryc_subflye_sample03_contig1101	contig1101	NA	NA	NA	root (UID1)	5656	56	24	56	0	0	0	0	0	0	0	0	4491	44	4997313	27725624	44	7
AOR_Tryc_subflye_sample03	tryc	subflye	sample03	AOR	flye	sub	tryc_subflye_sample03_contig1173	contig1173	NA	NA	NA	root (UID1)	5656	56	24	56	0	0	0	0	0	0	0	0	9377	44	4997313	27725624	44	7
AOR_Tryc_subflye_sample03	tryc	subflye	sample03	AOR	flye	sub	tryc_subflye_sample03_contig1321	contig1321	NA	NA	NA	root (UID1)	5656	56	24	56	0	0	0	0	0	0	0	0	40494	44	4997313	27725624	44	7
AOR_Tryc_subflye_sample03	tryc	subflye	sample03	AOR	flye	sub	tryc_subflye_sample03_contig1346	contig1346	NA	NA	NA	root (UID1)	5656	56	24	56	0	0	0	0	0	0	0	0	35408	44	4997313	27725624	44	7
AOR_Tryc_subflye_sample03	tryc	subflye	sample03	AOR	flye	sub	tryc_subflye_sample03_contig1383	contig1383	NA	NA	NA	root (UID1)	5656	56	24	56	0	0	0	0	0	0	0	0	27193	44	4997313	27725624	44	7
AOR_Tryc_subflye_sample03	tryc	subflye	sample03	AOR	flye	sub	tryc_subflye_sample03_contig1512	contig1512	NA	NA	NA	root (UID1)	5656	56	24	56	0	0	0	0	0	0	0	0	2163	44	4997313	27725624	44	7
AOR_Tryc_subflye_sample03	tryc	subflye	sample03	AOR	flye	sub	tryc_subflye_sample03_contig1548	contig1548	NA	NA	NA	k__Bacteria (UID203)	5449	104	58	102	2	0	0	0	0	3.45	0	0	3682696	44	4997313	27725624	44	7
AOR_Tryc_subflye_sample03	tryc	subflye	sample03	AOR	flye	sub	tryc_subflye_sample03_contig1554	contig1554	NA	NA	NA	root (UID1)	5656	56	24	56	0	0	0	0	0	0	0	0	11323	44	4997313	27725624	44	7
AOR_Tryc_subflye_sample03	tryc	subflye	sample03	AOR	flye	sub	tryc_subflye_sample03_contig1581	contig1581	NA	NA	NA	root (UID1)	5656	56	24	56	0	0	0	0	0	0	0	0	11356	44	4997313	27725624	44	7
AOR_Tryc_subflye_sample03	tryc	subflye	sample03	AOR	flye	sub	tryc_subflye_sample03_contig1606	contig1606	NA	NA	NA	root (UID1)	5656	56	24	56	0	0	0	0	0	0	0	0	4251	44	4997313	27725624	44	7
AOR_Tryc_subflye_sample03	tryc	subflye	sample03	AOR	flye	sub	tryc_subflye_sample03_contig1613	contig1613	NA	NA	NA	root (UID1)	5656	56	24	56	0	0	0	0	0	0	0	0	14954	44	4997313	27725624	44	7
AOR_Tryc_subflye_sample03	tryc	subflye	sample03	AOR	flye	sub	tryc_subflye_sample03_contig1619	contig1619	NA	NA	NA	root (UID1)	5656	56	24	56	0	0	0	0	0	0	0	0	17441	44	4997313	27725624	44	7
AOR_Tryc_subflye_sample03	tryc	subflye	sample03	AOR	flye	sub	tryc_subflye_sample03_contig1631	contig1631	NA	NA	NA	root (UID1)	5656	56	24	56	0	0	0	0	0	0	0	0	223113	44	4997313	27725624	44	7
AOR_Tryc_subflye_sample03	tryc	subflye	sample03	AOR	flye	sub	tryc_subflye_sample03_contig1633	contig1633	NA	NA	NA	root (UID1)	5656	56	24	56	0	0	0	0	0	0	0	0	18225	44	4997313	27725624	44	7
AOR_Tryc_subflye_sample03	tryc	subflye	sample03	AOR	flye	sub	tryc_subflye_sample03_contig1653	contig1653	NA	NA	NA	root (UID1)	5656	56	24	56	0	0	0	0	0	0	0	0	44020	44	4997313	27725624	44	7
AOR_Tryc_subflye_sample03	tryc	subflye	sample03	AOR	flye	sub	tryc_subflye_sample03_contig1657	contig1657	NA	NA	NA	k__Bacteria (UID203)	5449	104	58	99	5	0	0	0	0	0.78	0	0	39125	44	4997313	27725624	44	7
AOR_Tryc_subflye_sample03	tryc	subflye	sample03	AOR	flye	sub	tryc_subflye_sample03_contig197	contig197	NA	NA	NA	root (UID1)	5656	56	24	56	0	0	0	0	0	0	0	0	4289	44	4997313	27725624	44	7
AOR_Tryc_subflye_sample03	tryc	subflye	sample03	AOR	flye	sub	tryc_subflye_sample03_contig209	contig209	NA	NA	NA	root (UID1)	5656	56	24	56	0	0	0	0	0	0	0	0	15493	44	4997313	27725624	44	7
AOR_Tryc_subflye_sample03	tryc	subflye	sample03	AOR	flye	sub	tryc_subflye_sample03_contig27	contig27	NA	NA	NA	root (UID1)	5656	56	24	56	0	0	0	0	0	0	0	0	9924	44	4997313	27725624	44	7
AOR_Tryc_subflye_sample03	tryc	subflye	sample03	AOR	flye	sub	tryc_subflye_sample03_contig272	contig272	NA	NA	NA	root (UID1)	5656	56	24	56	0	0	0	0	0	0	0	0	4168	44	4997313	27725624	44	7
AOR_Tryc_subflye_sample03	tryc	subflye	sample03	AOR	flye	sub	tryc_subflye_sample03_contig283	contig283	NA	NA	NA	root (UID1)	5656	56	24	56	0	0	0	0	0	0	0	0	63150	44	4997313	27725624	44	7
AOR_Tryc_subflye_sample03	tryc	subflye	sample03	AOR	flye	sub	tryc_subflye_sample03_contig29	contig29	d__Bacteria;p__Proteobacteria	d__Bacteria	p__Proteobacteria	o__Rhizobiales (UID3447)	356	408	244	62	346	0	0	0	0	82.98	0	0	4243466	44	4997313	27725624	44	7
AOR_Tryc_subflye_sample03	tryc	subflye	sample03	AOR	flye	sub	tryc_subflye_sample03_contig300	contig300	NA	NA	NA	root (UID1)	5656	56	24	56	0	0	0	0	0	0	0	0	14602	44	4997313	27725624	44	7
AOR_Tryc_subflye_sample03	tryc	subflye	sample03	AOR	flye	sub	tryc_subflye_sample03_contig33	contig33	NA	NA	NA	root (UID1)	5656	56	24	56	0	0	0	0	0	0	0	0	83801	44	4997313	27725624	44	7
AOR_Tryc_subflye_sample03	tryc	subflye	sample03	AOR	flye	sub	tryc_subflye_sample03_contig422	contig422	NA	NA	NA	root (UID1)	5656	56	24	56	0	0	0	0	0	0	0	0	243963	44	4997313	27725624	44	7
AOR_Tryc_subflye_sample03	tryc	subflye	sample03	AOR	flye	sub	tryc_subflye_sample03_contig47	contig47	NA	NA	NA	root (UID1)	5656	56	24	56	0	0	0	0	0	0	0	0	130026	44	4997313	27725624	44	7
AOR_Tryc_subflye_sample03	tryc	subflye	sample03	AOR	flye	sub	tryc_subflye_sample03_contig51	contig51	d__Bacteria;p__Nitrospirota	d__Bacteria	p__Nitrospirota	k__Bacteria (UID3187)	2258	181	110	41	136	4	0	0	0	74.12	3.64	0	4340106	44	4997313	27725624	44	7
AOR_Tryc_subflye_sample03	tryc	subflye	sample03	AOR	flye	sub	tryc_subflye_sample03_contig60	contig60	NA	NA	NA	root (UID1)	5656	56	24	56	0	0	0	0	0	0	0	0	22374	44	4997313	27725624	44	7
AOR_Tryc_subflye_sample03	tryc	subflye	sample03	AOR	flye	sub	tryc_subflye_sample03_contig605	contig605	NA	NA	NA	root (UID1)	5656	56	24	56	0	0	0	0	0	0	0	0	23181	44	4997313	27725624	44	7
AOR_Tryc_subflye_sample03	tryc	subflye	sample03	AOR	flye	sub	tryc_subflye_sample03_contig644	contig644	NA	NA	NA	root (UID1)	5656	56	24	56	0	0	0	0	0	0	0	0	7445	44	4997313	27725624	44	7
AOR_Tryc_subflye_sample03	tryc	subflye	sample03	AOR	flye	sub	tryc_subflye_sample03_contig70	contig70	d__Bacteria;p__Planctomycetota	d__Bacteria	p__Planctomycetota	k__Bacteria (UID2565)	2921	143	88	38	104	1	0	0	0	65.93	0.07	0	4997313	44	4997313	27725624	44	7
AOR_Tryc_subflye_sample03	tryc	subflye	sample03	AOR	flye	sub	tryc_subflye_sample03_contig711	contig711	NA	NA	NA	root (UID1)	5656	56	24	56	0	0	0	0	0	0	0	0	3012	44	4997313	27725624	44	7
AOR_Tryc_subflye_sample03	tryc	subflye	sample03	AOR	flye	sub	tryc_subflye_sample03_contig712	contig712	d__Bacteria;p__Bacteroidota	d__Bacteria	p__Bacteroidota	p__Bacteroidetes (UID2605)	350	316	210	111	198	7	0	0	0	58.61	2.22	0	3166493	44	4997313	27725624	44	7
AOR_Tryc_subflye_sample03	tryc	subflye	sample03	AOR	flye	sub	tryc_subflye_sample03_contig771	contig771	d__Bacteria;p__Patescibacteria	d__Bacteria	p__Patescibacteria	k__Bacteria (UID1452)	924	161	108	94	67	0	0	0	0	34.78	0	0	1437200	44	4997313	27725624	44	7
AOR_Tryc_subflye_sample03	tryc	subflye	sample03	AOR	flye	sub	tryc_subflye_sample03_contig814	contig814	NA	NA	NA	root (UID1)	5656	56	24	56	0	0	0	0	0	0	0	0	2076	44	4997313	27725624	44	7
AOR_Tryc_subflye_sample03	tryc	subflye	sample03	AOR	flye	sub	tryc_subflye_sample03_contig841	contig841	NA	NA	NA	root (UID1)	5656	56	24	56	0	0	0	0	0	0	0	0	755	44	4997313	27725624	44	7
AOR_Tryc_subflye_sample03	tryc	subflye	sample03	AOR	flye	sub	tryc_subflye_sample03_contig864	contig864	NA	NA	NA	root (UID1)	5656	56	24	56	0	0	0	0	0	0	0	0	8999	44	4997313	27725624	44	7
AOR_Tryc_subflye_sample03	tryc	subflye	sample03	AOR	flye	sub	tryc_subflye_sample03_contig929	contig929	NA	NA	NA	root (UID1)	5656	56	24	56	0	0	0	0	0	0	0	0	4885	44	4997313	27725624	44	7
AOR_Tryc_subflye_sample03	tryc	subflye	sample03	AOR	flye	sub	tryc_subflye_sample03_contig949	contig949	NA	NA	NA	root (UID1)	5656	56	24	56	0	0	0	0	0	0	0	0	7624	44	4997313	27725624	44	7
AOR_Tryc_subflye_sample03	tryc	subflye	sample03	AOR	flye	sub	tryc_subflye_sample03_contig994	contig994	d__Bacteria;p__Chloroflexota	d__Bacteria	p__Chloroflexota	k__Bacteria (UID1452)	924	163	110	40	122	1	0	0	0	72.44	0.91	0	4657536	44	4997313	27725624	44	7
AOR_Tryc_subflye_sample04	tryc	subflye	sample04	AOR	flye	sub	tryc_subflye_sample04_contig1	contig1	NA	NA	NA	c__Betaproteobacteria (UID3959)	235	413	209	372	40	1	0	0	0	6.86	0.48	0	417824	41	4997508	32264119	41	8
AOR_Tryc_subflye_sample04	tryc	subflye	sample04	AOR	flye	sub	tryc_subflye_sample04_contig102	contig102	NA	NA	NA	root (UID1)	5656	56	24	56	0	0	0	0	0	0	0	0	4903	41	4997508	32264119	41	8
AOR_Tryc_subflye_sample04	tryc	subflye	sample04	AOR	flye	sub	tryc_subflye_sample04_contig1054	contig1054	NA	NA	NA	root (UID1)	5656	56	24	56	0	0	0	0	0	0	0	0	22364	41	4997508	32264119	41	8
AOR_Tryc_subflye_sample04	tryc	subflye	sample04	AOR	flye	sub	tryc_subflye_sample04_contig1078	contig1078	NA	NA	NA	root (UID1)	5656	56	24	56	0	0	0	0	0	0	0	0	4156	41	4997508	32264119	41	8
AOR_Tryc_subflye_sample04	tryc	subflye	sample04	AOR	flye	sub	tryc_subflye_sample04_contig1083	contig1083	NA	NA	NA	root (UID1)	5656	56	24	56	0	0	0	0	0	0	0	0	77464	41	4997508	32264119	41	8
AOR_Tryc_subflye_sample04	tryc	subflye	sample04	AOR	flye	sub	tryc_subflye_sample04_contig1090	contig1090	NA	NA	NA	root (UID1)	5656	56	24	56	0	0	0	0	0	0	0	0	5884	41	4997508	32264119	41	8
AOR_Tryc_subflye_sample04	tryc	subflye	sample04	AOR	flye	sub	tryc_subflye_sample04_contig125	contig125	NA	NA	NA	root (UID1)	5656	56	24	56	0	0	0	0	0	0	0	0	11478	41	4997508	32264119	41	8
AOR_Tryc_subflye_sample04	tryc	subflye	sample04	AOR	flye	sub	tryc_subflye_sample04_contig1256	contig1256	NA	NA	NA	k__Bacteria (UID203)	5449	104	58	100	4	0	0	0	0	4.31	0	0	3693800	41	4997508	32264119	41	8
AOR_Tryc_subflye_sample04	tryc	subflye	sample04	AOR	flye	sub	tryc_subflye_sample04_contig1257	contig1257	NA	NA	NA	root (UID1)	5656	56	24	56	0	0	0	0	0	0	0	0	9964	41	4997508	32264119	41	8
AOR_Tryc_subflye_sample04	tryc	subflye	sample04	AOR	flye	sub	tryc_subflye_sample04_contig13	contig13	d__Bacteria;p__Nitrospirota	d__Bacteria	p__Nitrospirota	k__Bacteria (UID3187)	2258	181	110	38	140	3	0	0	0	75.74	2.73	0	4375517	41	4997508	32264119	41	8
AOR_Tryc_subflye_sample04	tryc	subflye	sample04	AOR	flye	sub	tryc_subflye_sample04_contig1395	contig1395	NA	NA	NA	root (UID1)	5656	56	24	56	0	0	0	0	0	0	0	0	11354	41	4997508	32264119	41	8
AOR_Tryc_subflye_sample04	tryc	subflye	sample04	AOR	flye	sub	tryc_subflye_sample04_contig140	contig140	d__Bacteria;p__Chloroflexota	d__Bacteria	p__Chloroflexota	k__Bacteria (UID1452)	924	163	110	50	111	2	0	0	0	64.53	1.82	0	4657597	41	4997508	32264119	41	8
AOR_Tryc_subflye_sample04	tryc	subflye	sample04	AOR	flye	sub	tryc_subflye_sample04_contig1427	contig1427	NA	NA	NA	root (UID1)	5656	56	24	56	0	0	0	0	0	0	0	0	6586	41	4997508	32264119	41	8
AOR_Tryc_subflye_sample04	tryc	subflye	sample04	AOR	flye	sub	tryc_subflye_sample04_contig147	contig147	NA	NA	NA	root (UID1)	5656	56	24	56	0	0	0	0	0	0	0	0	4107	41	4997508	32264119	41	8
AOR_Tryc_subflye_sample04	tryc	subflye	sample04	AOR	flye	sub	tryc_subflye_sample04_contig1525	contig1525	NA	NA	NA	root (UID1)	5656	56	24	56	0	0	0	0	0	0	0	0	4263	41	4997508	32264119	41	8
AOR_Tryc_subflye_sample04	tryc	subflye	sample04	AOR	flye	sub	tryc_subflye_sample04_contig1546	contig1546	d__Bacteria;p__Bacteroidota	d__Bacteria	p__Bacteroidota	p__Bacteroidetes (UID2605)	350	316	210	102	204	10	0	0	0	60.99	2.86	0	3169360	41	4997508	32264119	41	8
AOR_Tryc_subflye_sample04	tryc	subflye	sample04	AOR	flye	sub	tryc_subflye_sample04_contig1550	contig1550	NA	NA	NA	root (UID1)	5656	56	24	56	0	0	0	0	0	0	0	0	23198	41	4997508	32264119	41	8
AOR_Tryc_subflye_sample04	tryc	subflye	sample04	AOR	flye	sub	tryc_subflye_sample04_contig1571	contig1571	NA	NA	NA	root (UID1)	5656	56	24	56	0	0	0	0	0	0	0	0	44029	41	4997508	32264119	41	8
AOR_Tryc_subflye_sample04	tryc	subflye	sample04	AOR	flye	sub	tryc_subflye_sample04_contig1576	contig1576	NA	NA	NA	root (UID1)	5656	56	24	56	0	0	0	0	0	0	0	0	17436	41	4997508	32264119	41	8
AOR_Tryc_subflye_sample04	tryc	subflye	sample04	AOR	flye	sub	tryc_subflye_sample04_contig1584	contig1584	NA	NA	NA	root (UID1)	5656	56	24	56	0	0	0	0	0	0	0	0	9374	41	4997508	32264119	41	8
AOR_Tryc_subflye_sample04	tryc	subflye	sample04	AOR	flye	sub	tryc_subflye_sample04_contig1585	contig1585	NA	NA	NA	root (UID1)	5656	56	24	56	0	0	0	0	0	0	0	0	2811	41	4997508	32264119	41	8
AOR_Tryc_subflye_sample04	tryc	subflye	sample04	AOR	flye	sub	tryc_subflye_sample04_contig1587	contig1587	NA	NA	NA	root (UID1)	5656	56	24	56	0	0	0	0	0	0	0	0	14979	41	4997508	32264119	41	8
AOR_Tryc_subflye_sample04	tryc	subflye	sample04	AOR	flye	sub	tryc_subflye_sample04_contig1596	contig1596	NA	NA	NA	root (UID1)	5656	56	24	56	0	0	0	0	0	0	0	0	223071	41	4997508	32264119	41	8
AOR_Tryc_subflye_sample04	tryc	subflye	sample04	AOR	flye	sub	tryc_subflye_sample04_contig1605	contig1605	NA	NA	NA	k__Bacteria (UID203)	5449	103	57	99	4	0	0	0	0	0.64	0	0	39120	41	4997508	32264119	41	8
AOR_Tryc_subflye_sample04	tryc	subflye	sample04	AOR	flye	sub	tryc_subflye_sample04_contig1621	contig1621	NA	NA	NA	k__Bacteria (UID203)	5449	104	58	93	11	0	0	0	0	2.43	0	0	26600	41	4997508	32264119	41	8
AOR_Tryc_subflye_sample04	tryc	subflye	sample04	AOR	flye	sub	tryc_subflye_sample04_contig1622	contig1622	NA	NA	NA	root (UID1)	5656	56	24	56	0	0	0	0	0	0	0	0	18226	41	4997508	32264119	41	8
AOR_Tryc_subflye_sample04	tryc	subflye	sample04	AOR	flye	sub	tryc_subflye_sample04_contig1623	contig1623	NA	NA	NA	root (UID1)	5656	56	24	56	0	0	0	0	0	0	0	0	11328	41	4997508	32264119	41	8
AOR_Tryc_subflye_sample04	tryc	subflye	sample04	AOR	flye	sub	tryc_subflye_sample04_contig21	contig21	d__Bacteria;p__Planctomycetota	d__Bacteria	p__Planctomycetota	k__Bacteria (UID2565)	2921	143	88	37	105	1	0	0	0	66.68	0.07	0	4997508	41	4997508	32264119	41	8
AOR_Tryc_subflye_sample04	tryc	subflye	sample04	AOR	flye	sub	tryc_subflye_sample04_contig327	contig327	d__Bacteria;p__Proteobacteria	d__Bacteria	p__Proteobacteria	o__Rhizobiales (UID3447)	356	408	244	70	338	0	0	0	0	80.42	0	0	4243558	41	4997508	32264119	41	8
AOR_Tryc_subflye_sample04	tryc	subflye	sample04	AOR	flye	sub	tryc_subflye_sample04_contig358	contig358	NA	NA	NA	root (UID1)	5656	56	24	56	0	0	0	0	0	0	0	0	2156	41	4997508	32264119	41	8
AOR_Tryc_subflye_sample04	tryc	subflye	sample04	AOR	flye	sub	tryc_subflye_sample04_contig36	contig36	d__Bacteria;p__Bacteroidota	d__Bacteria	p__Bacteroidota	o__Cytophagales (UID2936)	47	454	336	245	204	5	0	0	0	42.74	0.62	60	4013344	41	4997508	32264119	41	8
AOR_Tryc_subflye_sample04	tryc	subflye	sample04	AOR	flye	sub	tryc_subflye_sample04_contig380	contig380	d__Bacteria;p__Patescibacteria	d__Bacteria	p__Patescibacteria	k__Bacteria (UID1452)	924	151	101	61	89	1	0	0	0	53.19	0.99	0	1437385	41	4997508	32264119	41	8
AOR_Tryc_subflye_sample04	tryc	subflye	sample04	AOR	flye	sub	tryc_subflye_sample04_contig612	contig612	NA	NA	NA	root (UID1)	5656	56	24	56	0	0	0	0	0	0	0	0	8168	41	4997508	32264119	41	8
AOR_Tryc_subflye_sample04	tryc	subflye	sample04	AOR	flye	sub	tryc_subflye_sample04_contig67	contig67	NA	NA	NA	root (UID1)	5656	56	24	56	0	0	0	0	0	0	0	0	130037	41	4997508	32264119	41	8
AOR_Tryc_subflye_sample04	tryc	subflye	sample04	AOR	flye	sub	tryc_subflye_sample04_contig731	contig731	NA	NA	NA	root (UID1)	5656	56	24	56	0	0	0	0	0	0	0	0	40523	41	4997508	32264119	41	8
AOR_Tryc_subflye_sample04	tryc	subflye	sample04	AOR	flye	sub	tryc_subflye_sample04_contig762	contig762	NA	NA	NA	root (UID1)	5656	56	24	56	0	0	0	0	0	0	0	0	20298	41	4997508	32264119	41	8
AOR_Tryc_subflye_sample04	tryc	subflye	sample04	AOR	flye	sub	tryc_subflye_sample04_contig77	contig77	NA	NA	NA	root (UID1)	5656	56	24	56	0	0	0	0	0	0	0	0	14599	41	4997508	32264119	41	8
AOR_Tryc_subflye_sample04	tryc	subflye	sample04	AOR	flye	sub	tryc_subflye_sample04_contig815	contig815	NA	NA	NA	root (UID1)	5656	56	24	56	0	0	0	0	0	0	0	0	41518	41	4997508	32264119	41	8
AOR_Tryc_subflye_sample04	tryc	subflye	sample04	AOR	flye	sub	tryc_subflye_sample04_contig840	contig840	NA	NA	NA	root (UID1)	5656	56	24	56	0	0	0	0	0	0	0	0	4277	41	4997508	32264119	41	8
AOR_Tryc_subflye_sample04	tryc	subflye	sample04	AOR	flye	sub	tryc_subflye_sample04_contig856	contig856	NA	NA	NA	root (UID1)	5656	56	24	56	0	0	0	0	0	0	0	0	159996	41	4997508	32264119	41	8
AOR_Tryc_subflye_sample04	tryc	subflye	sample04	AOR	flye	sub	tryc_subflye_sample04_contig90	contig90	NA	NA	NA	root (UID1)	5656	56	24	56	0	0	0	0	0	0	0	0	243959	41	4997508	32264119	41	8
AOR_Tryc_subflye_sample05	tryc	subflye	sample05	AOR	flye	sub	tryc_subflye_sample05_contig11	contig11	NA	NA	NA	root (UID1)	5656	56	24	56	0	0	0	0	0	0	0	0	130026	37	4997484	28401671	37	7
AOR_Tryc_subflye_sample05	tryc	subflye	sample05	AOR	flye	sub	tryc_subflye_sample05_contig1120	contig1120	NA	NA	NA	root (UID1)	5656	56	24	56	0	0	0	0	0	0	0	0	22890	37	4997484	28401671	37	7
AOR_Tryc_subflye_sample05	tryc	subflye	sample05	AOR	flye	sub	tryc_subflye_sample05_contig1145	contig1145	NA	NA	NA	root (UID1)	5656	56	24	56	0	0	0	0	0	0	0	0	4903	37	4997484	28401671	37	7
AOR_Tryc_subflye_sample05	tryc	subflye	sample05	AOR	flye	sub	tryc_subflye_sample05_contig1156	contig1156	NA	NA	NA	root (UID1)	5656	56	24	56	0	0	0	0	0	0	0	0	4015	37	4997484	28401671	37	7
AOR_Tryc_subflye_sample05	tryc	subflye	sample05	AOR	flye	sub	tryc_subflye_sample05_contig1567	contig1567	NA	NA	NA	root (UID1)	5656	56	24	56	0	0	0	0	0	0	0	0	22377	37	4997484	28401671	37	7
AOR_Tryc_subflye_sample05	tryc	subflye	sample05	AOR	flye	sub	tryc_subflye_sample05_contig1581	contig1581	NA	NA	NA	root (UID1)	5656	56	24	56	0	0	0	0	0	0	0	0	17732	37	4997484	28401671	37	7
AOR_Tryc_subflye_sample05	tryc	subflye	sample05	AOR	flye	sub	tryc_subflye_sample05_contig1588	contig1588	d__Bacteria;p__Patescibacteria	d__Bacteria	p__Patescibacteria	k__Bacteria (UID1452)	924	151	101	79	72	0	0	0	0	41.75	0	0	1437469	37	4997484	28401671	37	7
AOR_Tryc_subflye_sample05	tryc	subflye	sample05	AOR	flye	sub	tryc_subflye_sample05_contig1592	contig1592	NA	NA	NA	root (UID1)	5656	56	24	56	0	0	0	0	0	0	0	0	18218	37	4997484	28401671	37	7
AOR_Tryc_subflye_sample05	tryc	subflye	sample05	AOR	flye	sub	tryc_subflye_sample05_contig1613	contig1613	NA	NA	NA	root (UID1)	5656	56	24	56	0	0	0	0	0	0	0	0	6078	37	4997484	28401671	37	7
AOR_Tryc_subflye_sample05	tryc	subflye	sample05	AOR	flye	sub	tryc_subflye_sample05_contig1628	contig1628	NA	NA	NA	root (UID1)	5656	56	24	56	0	0	0	0	0	0	0	0	9374	37	4997484	28401671	37	7
AOR_Tryc_subflye_sample05	tryc	subflye	sample05	AOR	flye	sub	tryc_subflye_sample05_contig1638	contig1638	NA	NA	NA	root (UID1)	5656	56	24	56	0	0	0	0	0	0	0	0	44034	37	4997484	28401671	37	7
AOR_Tryc_subflye_sample05	tryc	subflye	sample05	AOR	flye	sub	tryc_subflye_sample05_contig1643	contig1643	NA	NA	NA	root (UID1)	5656	56	24	56	0	0	0	0	0	0	0	0	23138	37	4997484	28401671	37	7
AOR_Tryc_subflye_sample05	tryc	subflye	sample05	AOR	flye	sub	tryc_subflye_sample05_contig1644	contig1644	NA	NA	NA	root (UID1)	5656	56	24	56	0	0	0	0	0	0	0	0	11318	37	4997484	28401671	37	7
AOR_Tryc_subflye_sample05	tryc	subflye	sample05	AOR	flye	sub	tryc_subflye_sample05_contig1645	contig1645	NA	NA	NA	root (UID1)	5656	56	24	56	0	0	0	0	0	0	0	0	11351	37	4997484	28401671	37	7
AOR_Tryc_subflye_sample05	tryc	subflye	sample05	AOR	flye	sub	tryc_subflye_sample05_contig1649	contig1649	NA	NA	NA	k__Bacteria (UID203)	5449	104	58	103	1	0	0	0	0	0.16	0	0	39082	37	4997484	28401671	37	7
AOR_Tryc_subflye_sample05	tryc	subflye	sample05	AOR	flye	sub	tryc_subflye_sample05_contig168	contig168	NA	NA	NA	k__Bacteria (UID203)	5449	104	58	96	8	0	0	0	0	7.37	0	0	3691360	37	4997484	28401671	37	7
AOR_Tryc_subflye_sample05	tryc	subflye	sample05	AOR	flye	sub	tryc_subflye_sample05_contig178	contig178	NA	NA	NA	root (UID1)	5656	56	24	56	0	0	0	0	0	0	0	0	9980	37	4997484	28401671	37	7
AOR_Tryc_subflye_sample05	tryc	subflye	sample05	AOR	flye	sub	tryc_subflye_sample05_contig197	contig197	NA	NA	NA	root (UID1)	5656	56	24	56	0	0	0	0	0	0	0	0	8172	37	4997484	28401671	37	7
AOR_Tryc_subflye_sample05	tryc	subflye	sample05	AOR	flye	sub	tryc_subflye_sample05_contig203	contig203	NA	NA	NA	root (UID1)	5656	56	24	56	0	0	0	0	0	0	0	0	243974	37	4997484	28401671	37	7
AOR_Tryc_subflye_sample05	tryc	subflye	sample05	AOR	flye	sub	tryc_subflye_sample05_contig262	contig262	NA	NA	NA	root (UID1)	5656	56	24	56	0	0	0	0	0	0	0	0	77524	37	4997484	28401671	37	7
AOR_Tryc_subflye_sample05	tryc	subflye	sample05	AOR	flye	sub	tryc_subflye_sample05_contig292	contig292	d__Bacteria;p__Planctomycetota	d__Bacteria	p__Planctomycetota	k__Bacteria (UID2565)	2921	143	88	35	107	1	0	0	0	67.05	0.07	0	4997484	37	4997484	28401671	37	7
AOR_Tryc_subflye_sample05	tryc	subflye	sample05	AOR	flye	sub	tryc_subflye_sample05_contig337	contig337	d__Bacteria;p__Proteobacteria	d__Bacteria	p__Proteobacteria	o__Rhizobiales (UID3447)	356	408	244	71	337	0	0	0	0	79.43	0	0	4243605	37	4997484	28401671	37	7
AOR_Tryc_subflye_sample05	tryc	subflye	sample05	AOR	flye	sub	tryc_subflye_sample05_contig464	contig464	d__Bacteria;p__Chloroflexota	d__Bacteria	p__Chloroflexota	k__Bacteria (UID1452)	924	163	110	50	112	1	0	0	0	64.89	0.91	0	4657512	37	4997484	28401671	37	7
AOR_Tryc_subflye_sample05	tryc	subflye	sample05	AOR	flye	sub	tryc_subflye_sample05_contig482	contig482	d__Bacteria;p__Bacteroidota	d__Bacteria	p__Bacteroidota	o__Cytophagales (UID2936)	47	454	336	239	211	4	0	0	0	43.71	0.57	50	4013361	37	4997484	28401671	37	7
AOR_Tryc_subflye_sample05	tryc	subflye	sample05	AOR	flye	sub	tryc_subflye_sample05_contig526	contig526	NA	NA	NA	root (UID1)	5656	56	24	56	0	0	0	0	0	0	0	0	3915	37	4997484	28401671	37	7
AOR_Tryc_subflye_sample05	tryc	subflye	sample05	AOR	flye	sub	tryc_subflye_sample05_contig53	contig53	d__Bacteria;p__Nitrospirota	d__Bacteria	p__Nitrospirota	k__Bacteria (UID3187)	2258	181	110	40	138	3	0	0	0	75.2	2.73	0	4340145	37	4997484	28401671	37	7
AOR_Tryc_subflye_sample05	tryc	subflye	sample05	AOR	flye	sub	tryc_subflye_sample05_contig562	contig562	NA	NA	NA	root (UID1)	5656	56	24	56	0	0	0	0	0	0	0	0	5949	37	4997484	28401671	37	7
AOR_Tryc_subflye_sample05	tryc	subflye	sample05	AOR	flye	sub	tryc_subflye_sample05_contig641	contig641	NA	NA	NA	root (UID1)	5656	56	24	56	0	0	0	0	0	0	0	0	41522	37	4997484	28401671	37	7
AOR_Tryc_subflye_sample05	tryc	subflye	sample05	AOR	flye	sub	tryc_subflye_sample05_contig671	contig671	NA	NA	NA	root (UID1)	5656	56	24	56	0	0	0	0	0	0	0	0	14455	37	4997484	28401671	37	7
AOR_Tryc_subflye_sample05	tryc	subflye	sample05	AOR	flye	sub	tryc_subflye_sample05_contig733	contig733	NA	NA	NA	root (UID1)	5656	56	24	56	0	0	0	0	0	0	0	0	40502	37	4997484	28401671	37	7
AOR_Tryc_subflye_sample05	tryc	subflye	sample05	AOR	flye	sub	tryc_subflye_sample05_contig734	contig734	NA	NA	NA	root (UID1)	5656	56	24	56	0	0	0	0	0	0	0	0	35420	37	4997484	28401671	37	7
AOR_Tryc_subflye_sample05	tryc	subflye	sample05	AOR	flye	sub	tryc_subflye_sample05_contig735	contig735	NA	NA	NA	root (UID1)	5656	56	24	56	0	0	0	0	0	0	0	0	18106	37	4997484	28401671	37	7
AOR_Tryc_subflye_sample05	tryc	subflye	sample05	AOR	flye	sub	tryc_subflye_sample05_contig875	contig875	NA	NA	NA	root (UID1)	5656	56	24	56	0	0	0	0	0	0	0	0	34740	37	4997484	28401671	37	7
AOR_Tryc_subflye_sample05	tryc	subflye	sample05	AOR	flye	sub	tryc_subflye_sample05_contig892	contig892	NA	NA	NA	root (UID1)	5656	56	24	56	0	0	0	0	0	0	0	0	2316	37	4997484	28401671	37	7
AOR_Tryc_subflye_sample05	tryc	subflye	sample05	AOR	flye	sub	tryc_subflye_sample05_contig9	contig9	NA	NA	NA	root (UID1)	5656	56	24	56	0	0	0	0	0	0	0	0	83821	37	4997484	28401671	37	7
AOR_Tryc_subflye_sample05	tryc	subflye	sample05	AOR	flye	sub	tryc_subflye_sample05_contig907	contig907	NA	NA	NA	root (UID1)	5656	56	24	56	0	0	0	0	0	0	0	0	15508	37	4997484	28401671	37	7
AOR_Tryc_subflye_sample05	tryc	subflye	sample05	AOR	flye	sub	tryc_subflye_sample05_contig983	contig983	NA	NA	NA	root (UID1)	5656	56	24	56	0	0	0	0	0	0	0	0	20295	37	4997484	28401671	37	7
AOR_Tryc_subflye_sample06	tryc	subflye	sample06	AOR	flye	sub	tryc_subflye_sample06_contig1026	contig1026	NA	NA	NA	root (UID1)	5656	56	24	56	0	0	0	0	0	0	0	0	40482	38	4997318	24590550	38	6
AOR_Tryc_subflye_sample06	tryc	subflye	sample06	AOR	flye	sub	tryc_subflye_sample06_contig1087	contig1087	NA	NA	NA	root (UID1)	5656	56	24	56	0	0	0	0	0	0	0	0	20308	38	4997318	24590550	38	6
AOR_Tryc_subflye_sample06	tryc	subflye	sample06	AOR	flye	sub	tryc_subflye_sample06_contig11	contig11	d__Bacteria;p__Planctomycetota	d__Bacteria	p__Planctomycetota	k__Bacteria (UID2565)	2921	143	88	36	106	1	0	0	0	65.82	0.07	0	4997318	38	4997318	24590550	38	6
AOR_Tryc_subflye_sample06	tryc	subflye	sample06	AOR	flye	sub	tryc_subflye_sample06_contig1114	contig1114	d__Bacteria;p__Chloroflexota	d__Bacteria	p__Chloroflexota	k__Bacteria (UID1452)	924	163	110	44	118	1	0	0	0	68.55	0.91	0	4657594	38	4997318	24590550	38	6
AOR_Tryc_subflye_sample06	tryc	subflye	sample06	AOR	flye	sub	tryc_subflye_sample06_contig1147	contig1147	NA	NA	NA	root (UID1)	5656	56	24	56	0	0	0	0	0	0	0	0	7582	38	4997318	24590550	38	6
AOR_Tryc_subflye_sample06	tryc	subflye	sample06	AOR	flye	sub	tryc_subflye_sample06_contig1248	contig1248	NA	NA	NA	root (UID1)	5656	56	24	56	0	0	0	0	0	0	0	0	22357	38	4997318	24590550	38	6
AOR_Tryc_subflye_sample06	tryc	subflye	sample06	AOR	flye	sub	tryc_subflye_sample06_contig1282	contig1282	NA	NA	NA	root (UID1)	5656	56	24	56	0	0	0	0	0	0	0	0	18073	38	4997318	24590550	38	6
AOR_Tryc_subflye_sample06	tryc	subflye	sample06	AOR	flye	sub	tryc_subflye_sample06_contig1326	contig1326	NA	NA	NA	root (UID1)	5656	56	24	56	0	0	0	0	0	0	0	0	35438	38	4997318	24590550	38	6
AOR_Tryc_subflye_sample06	tryc	subflye	sample06	AOR	flye	sub	tryc_subflye_sample06_contig1347	contig1347	NA	NA	NA	root (UID1)	5656	56	24	56	0	0	0	0	0	0	0	0	77494	38	4997318	24590550	38	6
AOR_Tryc_subflye_sample06	tryc	subflye	sample06	AOR	flye	sub	tryc_subflye_sample06_contig1437	contig1437	NA	NA	NA	root (UID1)	5656	56	24	56	0	0	0	0	0	0	0	0	11338	38	4997318	24590550	38	6
AOR_Tryc_subflye_sample06	tryc	subflye	sample06	AOR	flye	sub	tryc_subflye_sample06_contig1588	contig1588	NA	NA	NA	root (UID1)	5656	56	24	56	0	0	0	0	0	0	0	0	19922	38	4997318	24590550	38	6
AOR_Tryc_subflye_sample06	tryc	subflye	sample06	AOR	flye	sub	tryc_subflye_sample06_contig1623	contig1623	NA	NA	NA	root (UID1)	5656	56	24	56	0	0	0	0	0	0	0	0	9371	38	4997318	24590550	38	6
AOR_Tryc_subflye_sample06	tryc	subflye	sample06	AOR	flye	sub	tryc_subflye_sample06_contig1631	contig1631	NA	NA	NA	root (UID1)	5656	56	24	56	0	0	0	0	0	0	0	0	15503	38	4997318	24590550	38	6
AOR_Tryc_subflye_sample06	tryc	subflye	sample06	AOR	flye	sub	tryc_subflye_sample06_contig164	contig164	NA	NA	NA	root (UID1)	5656	56	24	56	0	0	0	0	0	0	0	0	8169	38	4997318	24590550	38	6
AOR_Tryc_subflye_sample06	tryc	subflye	sample06	AOR	flye	sub	tryc_subflye_sample06_contig1640	contig1640	NA	NA	NA	root (UID1)	5656	56	24	56	0	0	0	0	0	0	0	0	234654	38	4997318	24590550	38	6
AOR_Tryc_subflye_sample06	tryc	subflye	sample06	AOR	flye	sub	tryc_subflye_sample06_contig1646	contig1646	NA	NA	NA	k__Bacteria (UID203)	5449	104	58	102	2	0	0	0	0	0.5	0	0	39095	38	4997318	24590550	38	6
AOR_Tryc_subflye_sample06	tryc	subflye	sample06	AOR	flye	sub	tryc_subflye_sample06_contig1647	contig1647	NA	NA	NA	root (UID1)	5656	56	24	56	0	0	0	0	0	0	0	0	19682	38	4997318	24590550	38	6
AOR_Tryc_subflye_sample06	tryc	subflye	sample06	AOR	flye	sub	tryc_subflye_sample06_contig1652	contig1652	NA	NA	NA	root (UID1)	5656	56	24	56	0	0	0	0	0	0	0	0	18223	38	4997318	24590550	38	6
AOR_Tryc_subflye_sample06	tryc	subflye	sample06	AOR	flye	sub	tryc_subflye_sample06_contig1657	contig1657	NA	NA	NA	root (UID1)	5656	56	24	56	0	0	0	0	0	0	0	0	44067	38	4997318	24590550	38	6
AOR_Tryc_subflye_sample06	tryc	subflye	sample06	AOR	flye	sub	tryc_subflye_sample06_contig1659	contig1659	NA	NA	NA	root (UID1)	5656	56	24	56	0	0	0	0	0	0	0	0	6051	38	4997318	24590550	38	6
AOR_Tryc_subflye_sample06	tryc	subflye	sample06	AOR	flye	sub	tryc_subflye_sample06_contig1660	contig1660	NA	NA	NA	root (UID1)	5656	56	24	56	0	0	0	0	0	0	0	0	24055	38	4997318	24590550	38	6
AOR_Tryc_subflye_sample06	tryc	subflye	sample06	AOR	flye	sub	tryc_subflye_sample06_contig206	contig206	d__Bacteria;p__Proteobacteria	d__Bacteria	p__Proteobacteria	o__Rhizobiales (UID3447)	356	408	244	71	336	1	0	0	0	79.43	0.41	0	4243517	38	4997318	24590550	38	6
AOR_Tryc_subflye_sample06	tryc	subflye	sample06	AOR	flye	sub	tryc_subflye_sample06_contig220	contig220	NA	NA	NA	root (UID1)	5656	56	24	56	0	0	0	0	0	0	0	0	130116	38	4997318	24590550	38	6
AOR_Tryc_subflye_sample06	tryc	subflye	sample06	AOR	flye	sub	tryc_subflye_sample06_contig227	contig227	NA	NA	NA	root (UID1)	5656	56	24	56	0	0	0	0	0	0	0	0	8476	38	4997318	24590550	38	6
AOR_Tryc_subflye_sample06	tryc	subflye	sample06	AOR	flye	sub	tryc_subflye_sample06_contig349	contig349	NA	NA	NA	root (UID1)	5656	56	24	56	0	0	0	0	0	0	0	0	948	38	4997318	24590550	38	6
AOR_Tryc_subflye_sample06	tryc	subflye	sample06	AOR	flye	sub	tryc_subflye_sample06_contig378	contig378	NA	NA	NA	root (UID1)	5656	56	24	56	0	0	0	0	0	0	0	0	6140	38	4997318	24590550	38	6
AOR_Tryc_subflye_sample06	tryc	subflye	sample06	AOR	flye	sub	tryc_subflye_sample06_contig392	contig392	NA	NA	NA	root (UID1)	5656	56	24	56	0	0	0	0	0	0	0	0	4006	38	4997318	24590550	38	6
AOR_Tryc_subflye_sample06	tryc	subflye	sample06	AOR	flye	sub	tryc_subflye_sample06_contig396	contig396	NA	NA	NA	root (UID1)	5656	56	24	56	0	0	0	0	0	0	0	0	3870	38	4997318	24590550	38	6
AOR_Tryc_subflye_sample06	tryc	subflye	sample06	AOR	flye	sub	tryc_subflye_sample06_contig451	contig451	d__Bacteria;p__Bacteroidota	d__Bacteria	p__Bacteroidota	o__Cytophagales (UID2936)	47	454	336	237	213	4	0	0	0	46.69	0.57	50	4013090	38	4997318	24590550	38	6
AOR_Tryc_subflye_sample06	tryc	subflye	sample06	AOR	flye	sub	tryc_subflye_sample06_contig508	contig508	d__Bacteria;p__Nitrospirota	d__Bacteria	p__Nitrospirota	k__Bacteria (UID3187)	2258	181	110	38	139	4	0	0	0	75.31	3.64	0	4340103	38	4997318	24590550	38	6
AOR_Tryc_subflye_sample06	tryc	subflye	sample06	AOR	flye	sub	tryc_subflye_sample06_contig510	contig510	d__Bacteria;p__Patescibacteria	d__Bacteria	p__Patescibacteria	k__Bacteria (UID1452)	924	151	101	84	67	0	0	0	0	35.78	0	0	1437414	38	4997318	24590550	38	6
AOR_Tryc_subflye_sample06	tryc	subflye	sample06	AOR	flye	sub	tryc_subflye_sample06_contig535	contig535	NA	NA	NA	root (UID1)	5656	56	24	56	0	0	0	0	0	0	0	0	1438	38	4997318	24590550	38	6
AOR_Tryc_subflye_sample06	tryc	subflye	sample06	AOR	flye	sub	tryc_subflye_sample06_contig600	contig600	NA	NA	NA	root (UID1)	5656	56	24	56	0	0	0	0	0	0	0	0	4256	38	4997318	24590550	38	6
AOR_Tryc_subflye_sample06	tryc	subflye	sample06	AOR	flye	sub	tryc_subflye_sample06_contig700	contig700	NA	NA	NA	root (UID1)	5656	56	24	56	0	0	0	0	0	0	0	0	4150	38	4997318	24590550	38	6
AOR_Tryc_subflye_sample06	tryc	subflye	sample06	AOR	flye	sub	tryc_subflye_sample06_contig73	contig73	NA	NA	NA	root (UID1)	5656	56	24	56	0	0	0	0	0	0	0	0	9954	38	4997318	24590550	38	6
AOR_Tryc_subflye_sample06	tryc	subflye	sample06	AOR	flye	sub	tryc_subflye_sample06_contig849	contig849	NA	NA	NA	root (UID1)	5656	56	24	56	0	0	0	0	0	0	0	0	8986	38	4997318	24590550	38	6
AOR_Tryc_subflye_sample06	tryc	subflye	sample06	AOR	flye	sub	tryc_subflye_sample06_contig884	contig884	NA	NA	NA	root (UID1)	5656	56	24	56	0	0	0	0	0	0	0	0	41446	38	4997318	24590550	38	6
AOR_Tryc_subflye_sample06	tryc	subflye	sample06	AOR	flye	sub	tryc_subflye_sample06_contig931	contig931	NA	NA	NA	root (UID1)	5656	56	24	56	0	0	0	0	0	0	0	0	5864	38	4997318	24590550	38	6
AOR_Tryc_subflye_sample07	tryc	subflye	sample07	AOR	flye	sub	tryc_subflye_sample07_contig1004	contig1004	NA	NA	NA	root (UID1)	5656	56	24	56	0	0	0	0	0	0	0	0	34724	34	4997669	23039084	34	5
AOR_Tryc_subflye_sample07	tryc	subflye	sample07	AOR	flye	sub	tryc_subflye_sample07_contig1008	contig1008	NA	NA	NA	root (UID1)	5656	56	24	56	0	0	0	0	0	0	0	0	7575	34	4997669	23039084	34	5
AOR_Tryc_subflye_sample07	tryc	subflye	sample07	AOR	flye	sub	tryc_subflye_sample07_contig109	contig109	d__Bacteria;p__Proteobacteria	d__Bacteria	p__Proteobacteria	o__Rhizobiales (UID3447)	356	408	244	67	340	1	0	0	0	81.2	0.41	0	4243661	34	4997669	23039084	34	5
AOR_Tryc_subflye_sample07	tryc	subflye	sample07	AOR	flye	sub	tryc_subflye_sample07_contig1250	contig1250	NA	NA	NA	root (UID1)	5656	56	24	56	0	0	0	0	0	0	0	0	11350	34	4997669	23039084	34	5
AOR_Tryc_subflye_sample07	tryc	subflye	sample07	AOR	flye	sub	tryc_subflye_sample07_contig1260	contig1260	NA	NA	NA	root (UID1)	5656	56	24	56	0	0	0	0	0	0	0	0	6574	34	4997669	23039084	34	5
AOR_Tryc_subflye_sample07	tryc	subflye	sample07	AOR	flye	sub	tryc_subflye_sample07_contig1298	contig1298	NA	NA	NA	root (UID1)	5656	56	24	56	0	0	0	0	0	0	0	0	18084	34	4997669	23039084	34	5
AOR_Tryc_subflye_sample07	tryc	subflye	sample07	AOR	flye	sub	tryc_subflye_sample07_contig1344	contig1344	NA	NA	NA	root (UID1)	5656	56	24	56	0	0	0	0	0	0	0	0	5725	34	4997669	23039084	34	5
AOR_Tryc_subflye_sample07	tryc	subflye	sample07	AOR	flye	sub	tryc_subflye_sample07_contig154	contig154	NA	NA	NA	root (UID1)	5656	56	24	56	0	0	0	0	0	0	0	0	3829	34	4997669	23039084	34	5
AOR_Tryc_subflye_sample07	tryc	subflye	sample07	AOR	flye	sub	tryc_subflye_sample07_contig1572	contig1572	NA	NA	NA	root (UID1)	5656	56	24	56	0	0	0	0	0	0	0	0	6051	34	4997669	23039084	34	5
AOR_Tryc_subflye_sample07	tryc	subflye	sample07	AOR	flye	sub	tryc_subflye_sample07_contig1581	contig1581	NA	NA	NA	root (UID1)	5656	56	24	56	0	0	0	0	0	0	0	0	9368	34	4997669	23039084	34	5
AOR_Tryc_subflye_sample07	tryc	subflye	sample07	AOR	flye	sub	tryc_subflye_sample07_contig1584	contig1584	NA	NA	NA	root (UID1)	5656	56	24	56	0	0	0	0	0	0	0	0	3275	34	4997669	23039084	34	5
AOR_Tryc_subflye_sample07	tryc	subflye	sample07	AOR	flye	sub	tryc_subflye_sample07_contig1589	contig1589	NA	NA	NA	root (UID1)	5656	56	24	56	0	0	0	0	0	0	0	0	9111	34	4997669	23039084	34	5
AOR_Tryc_subflye_sample07	tryc	subflye	sample07	AOR	flye	sub	tryc_subflye_sample07_contig1590	contig1590	NA	NA	NA	root (UID1)	5656	56	24	56	0	0	0	0	0	0	0	0	223063	34	4997669	23039084	34	5
AOR_Tryc_subflye_sample07	tryc	subflye	sample07	AOR	flye	sub	tryc_subflye_sample07_contig1608	contig1608	NA	NA	NA	root (UID1)	5656	56	24	56	0	0	0	0	0	0	0	0	22388	34	4997669	23039084	34	5
AOR_Tryc_subflye_sample07	tryc	subflye	sample07	AOR	flye	sub	tryc_subflye_sample07_contig1609	contig1609	NA	NA	NA	k__Bacteria (UID203)	5449	103	57	100	3	0	0	0	0	0.48	0	0	39111	34	4997669	23039084	34	5
AOR_Tryc_subflye_sample07	tryc	subflye	sample07	AOR	flye	sub	tryc_subflye_sample07_contig1612	contig1612	NA	NA	NA	root (UID1)	5656	56	24	56	0	0	0	0	0	0	0	0	19692	34	4997669	23039084	34	5
AOR_Tryc_subflye_sample07	tryc	subflye	sample07	AOR	flye	sub	tryc_subflye_sample07_contig1613	contig1613	NA	NA	NA	root (UID1)	5656	56	24	56	0	0	0	0	0	0	0	0	11325	34	4997669	23039084	34	5
AOR_Tryc_subflye_sample07	tryc	subflye	sample07	AOR	flye	sub	tryc_subflye_sample07_contig185	contig185	d__Bacteria;p__Bacteroidota	d__Bacteria	p__Bacteroidota	o__Cytophagales (UID2936)	47	454	336	238	213	3	0	0	0	44.35	0.18	100	4012676	34	4997669	23039084	34	5
AOR_Tryc_subflye_sample07	tryc	subflye	sample07	AOR	flye	sub	tryc_subflye_sample07_contig194	contig194	NA	NA	NA	root (UID1)	5656	56	24	56	0	0	0	0	0	0	0	0	103050	34	4997669	23039084	34	5
AOR_Tryc_subflye_sample07	tryc	subflye	sample07	AOR	flye	sub	tryc_subflye_sample07_contig203	contig203	NA	NA	NA	root (UID1)	5656	56	24	56	0	0	0	0	0	0	0	0	35439	34	4997669	23039084	34	5
AOR_Tryc_subflye_sample07	tryc	subflye	sample07	AOR	flye	sub	tryc_subflye_sample07_contig21	contig21	d__Bacteria;p__Planctomycetota	d__Bacteria	p__Planctomycetota	k__Bacteria (UID2565)	2921	143	88	37	105	1	0	0	0	66.18	0.07	0	4997669	34	4997669	23039084	34	5
AOR_Tryc_subflye_sample07	tryc	subflye	sample07	AOR	flye	sub	tryc_subflye_sample07_contig224	contig224	NA	NA	NA	root (UID1)	5656	56	24	56	0	0	0	0	0	0	0	0	1161	34	4997669	23039084	34	5
AOR_Tryc_subflye_sample07	tryc	subflye	sample07	AOR	flye	sub	tryc_subflye_sample07_contig310	contig310	NA	NA	NA	root (UID1)	5656	56	24	56	0	0	0	0	0	0	0	0	9935	34	4997669	23039084	34	5
AOR_Tryc_subflye_sample07	tryc	subflye	sample07	AOR	flye	sub	tryc_subflye_sample07_contig44	contig44	d__Bacteria;p__Nitrospirota	d__Bacteria	p__Nitrospirota	k__Bacteria (UID3187)	2258	181	110	39	139	3	0	0	0	75.25	2.73	0	4354973	34	4997669	23039084	34	5
AOR_Tryc_subflye_sample07	tryc	subflye	sample07	AOR	flye	sub	tryc_subflye_sample07_contig548	contig548	NA	NA	NA	root (UID1)	5656	56	24	56	0	0	0	0	0	0	0	0	6248	34	4997669	23039084	34	5
AOR_Tryc_subflye_sample07	tryc	subflye	sample07	AOR	flye	sub	tryc_subflye_sample07_contig62	contig62	NA	NA	NA	root (UID1)	5656	56	24	56	0	0	0	0	0	0	0	0	8170	34	4997669	23039084	34	5
AOR_Tryc_subflye_sample07	tryc	subflye	sample07	AOR	flye	sub	tryc_subflye_sample07_contig806	contig806	NA	NA	NA	root (UID1)	5656	56	24	56	0	0	0	0	0	0	0	0	5873	34	4997669	23039084	34	5
AOR_Tryc_subflye_sample07	tryc	subflye	sample07	AOR	flye	sub	tryc_subflye_sample07_contig870	contig870	d__Bacteria;p__Chloroflexota	d__Bacteria	p__Chloroflexota	k__Bacteria (UID1452)	924	163	110	37	125	1	0	0	0	72.87	0.1	0	4657589	34	4997669	23039084	34	5
AOR_Tryc_subflye_sample07	tryc	subflye	sample07	AOR	flye	sub	tryc_subflye_sample07_contig88	contig88	NA	NA	NA	root (UID1)	5656	56	24	56	0	0	0	0	0	0	0	0	540	34	4997669	23039084	34	5
AOR_Tryc_subflye_sample07	tryc	subflye	sample07	AOR	flye	sub	tryc_subflye_sample07_contig885	contig885	NA	NA	NA	root (UID1)	5656	56	24	56	0	0	0	0	0	0	0	0	9015	34	4997669	23039084	34	5
AOR_Tryc_subflye_sample07	tryc	subflye	sample07	AOR	flye	sub	tryc_subflye_sample07_contig912	contig912	NA	NA	NA	root (UID1)	5656	56	24	56	0	0	0	0	0	0	0	0	23399	34	4997669	23039084	34	5
AOR_Tryc_subflye_sample07	tryc	subflye	sample07	AOR	flye	sub	tryc_subflye_sample07_contig934	contig934	NA	NA	NA	root (UID1)	5656	56	24	56	0	0	0	0	0	0	0	0	20298	34	4997669	23039084	34	5
AOR_Tryc_subflye_sample07	tryc	subflye	sample07	AOR	flye	sub	tryc_subflye_sample07_contig961	contig961	NA	NA	NA	root (UID1)	5656	56	24	56	0	0	0	0	0	0	0	0	77678	34	4997669	23039084	34	5
AOR_Tryc_subflye_sample07	tryc	subflye	sample07	AOR	flye	sub	tryc_subflye_sample07_contig974	contig974	NA	NA	NA	root (UID1)	5656	56	24	56	0	0	0	0	0	0	0	0	40465	34	4997669	23039084	34	5
AOR_Tryc_subflye_sample08	tryc	subflye	sample08	AOR	flye	sub	tryc_subflye_sample08_contig1054	contig1054	NA	NA	NA	root (UID1)	5656	56	24	56	0	0	0	0	0	0	0	0	11482	44	4997564	31589590	44	8
AOR_Tryc_subflye_sample08	tryc	subflye	sample08	AOR	flye	sub	tryc_subflye_sample08_contig1157	contig1157	NA	NA	NA	root (UID1)	5656	56	24	56	0	0	0	0	0	0	0	0	18084	44	4997564	31589590	44	8
AOR_Tryc_subflye_sample08	tryc	subflye	sample08	AOR	flye	sub	tryc_subflye_sample08_contig1158	contig1158	NA	NA	NA	root (UID1)	5656	56	24	56	0	0	0	0	0	0	0	0	35421	44	4997564	31589590	44	8
AOR_Tryc_subflye_sample08	tryc	subflye	sample08	AOR	flye	sub	tryc_subflye_sample08_contig1211	contig1211	NA	NA	NA	root (UID1)	5656	56	24	56	0	0	0	0	0	0	0	0	8513	44	4997564	31589590	44	8
AOR_Tryc_subflye_sample08	tryc	subflye	sample08	AOR	flye	sub	tryc_subflye_sample08_contig1253	contig1253	NA	NA	NA	root (UID1)	5656	56	24	56	0	0	0	0	0	0	0	0	6607	44	4997564	31589590	44	8
AOR_Tryc_subflye_sample08	tryc	subflye	sample08	AOR	flye	sub	tryc_subflye_sample08_contig134	contig134	NA	NA	NA	root (UID1)	5656	56	24	56	0	0	0	0	0	0	0	0	3828	44	4997564	31589590	44	8
AOR_Tryc_subflye_sample08	tryc	subflye	sample08	AOR	flye	sub	tryc_subflye_sample08_contig1477	contig1477	NA	NA	NA	root (UID1)	5656	56	24	56	0	0	0	0	0	0	0	0	5752	44	4997564	31589590	44	8
AOR_Tryc_subflye_sample08	tryc	subflye	sample08	AOR	flye	sub	tryc_subflye_sample08_contig1511	contig1511	d__Bacteria;p__Patescibacteria	d__Bacteria	p__Patescibacteria	k__Bacteria (UID2495)	2993	143	89	91	52	0	0	0	0	28.87	0	0	1437304	44	4997564	31589590	44	8
AOR_Tryc_subflye_sample08	tryc	subflye	sample08	AOR	flye	sub	tryc_subflye_sample08_contig1534	contig1534	NA	NA	NA	root (UID1)	5656	56	24	56	0	0	0	0	0	0	0	0	11323	44	4997564	31589590	44	8
AOR_Tryc_subflye_sample08	tryc	subflye	sample08	AOR	flye	sub	tryc_subflye_sample08_contig1556	contig1556	NA	NA	NA	root (UID1)	5656	56	24	56	0	0	0	0	0	0	0	0	25042	44	4997564	31589590	44	8
AOR_Tryc_subflye_sample08	tryc	subflye	sample08	AOR	flye	sub	tryc_subflye_sample08_contig1557	contig1557	NA	NA	NA	root (UID1)	5656	56	24	56	0	0	0	0	0	0	0	0	14996	44	4997564	31589590	44	8
AOR_Tryc_subflye_sample08	tryc	subflye	sample08	AOR	flye	sub	tryc_subflye_sample08_contig1560	contig1560	NA	NA	NA	root (UID1)	5656	56	24	56	0	0	0	0	0	0	0	0	223047	44	4997564	31589590	44	8
AOR_Tryc_subflye_sample08	tryc	subflye	sample08	AOR	flye	sub	tryc_subflye_sample08_contig1565	contig1565	NA	NA	NA	root (UID1)	5656	56	24	56	0	0	0	0	0	0	0	0	22357	44	4997564	31589590	44	8
AOR_Tryc_subflye_sample08	tryc	subflye	sample08	AOR	flye	sub	tryc_subflye_sample08_contig1572	contig1572	NA	NA	NA	root (UID1)	5656	56	24	56	0	0	0	0	0	0	0	0	37848	44	4997564	31589590	44	8
AOR_Tryc_subflye_sample08	tryc	subflye	sample08	AOR	flye	sub	tryc_subflye_sample08_contig1577	contig1577	NA	NA	NA	root (UID1)	5656	56	24	56	0	0	0	0	0	0	0	0	9375	44	4997564	31589590	44	8
AOR_Tryc_subflye_sample08	tryc	subflye	sample08	AOR	flye	sub	tryc_subflye_sample08_contig158	contig158	NA	NA	NA	root (UID1)	5656	56	24	56	0	0	0	0	0	0	0	0	1622	44	4997564	31589590	44	8
AOR_Tryc_subflye_sample08	tryc	subflye	sample08	AOR	flye	sub	tryc_subflye_sample08_contig1580	contig1580	NA	NA	NA	root (UID1)	5656	56	24	56	0	0	0	0	0	0	0	0	18211	44	4997564	31589590	44	8
AOR_Tryc_subflye_sample08	tryc	subflye	sample08	AOR	flye	sub	tryc_subflye_sample08_contig1595	contig1595	NA	NA	NA	k__Bacteria (UID203)	5449	103	57	98	5	0	0	0	0	1.71	0	0	39127	44	4997564	31589590	44	8
AOR_Tryc_subflye_sample08	tryc	subflye	sample08	AOR	flye	sub	tryc_subflye_sample08_contig1596	contig1596	NA	NA	NA	root (UID1)	5656	56	24	56	0	0	0	0	0	0	0	0	11347	44	4997564	31589590	44	8
AOR_Tryc_subflye_sample08	tryc	subflye	sample08	AOR	flye	sub	tryc_subflye_sample08_contig173	contig173	NA	NA	NA	root (UID1)	5656	56	24	56	0	0	0	0	0	0	0	0	212171	44	4997564	31589590	44	8
AOR_Tryc_subflye_sample08	tryc	subflye	sample08	AOR	flye	sub	tryc_subflye_sample08_contig174	contig174	NA	NA	NA	root (UID1)	5656	56	24	56	0	0	0	0	0	0	0	0	77917	44	4997564	31589590	44	8
AOR_Tryc_subflye_sample08	tryc	subflye	sample08	AOR	flye	sub	tryc_subflye_sample08_contig227	contig227	NA	NA	NA	root (UID1)	5656	56	24	56	0	0	0	0	0	0	0	0	83749	44	4997564	31589590	44	8
AOR_Tryc_subflye_sample08	tryc	subflye	sample08	AOR	flye	sub	tryc_subflye_sample08_contig27	contig27	d__Bacteria;p__Nitrospirota	d__Bacteria	p__Nitrospirota	k__Bacteria (UID3187)	2258	181	110	35	143	3	0	0	0	77.77	2.73	0	4340234	44	4997564	31589590	44	8
AOR_Tryc_subflye_sample08	tryc	subflye	sample08	AOR	flye	sub	tryc_subflye_sample08_contig326	contig326	d__Bacteria;p__Bacteroidota	d__Bacteria	p__Bacteroidota	o__Cytophagales (UID2936)	47	454	336	247	203	4	0	0	0	43.13	0.57	50	4012752	44	4997564	31589590	44	8
AOR_Tryc_subflye_sample08	tryc	subflye	sample08	AOR	flye	sub	tryc_subflye_sample08_contig349	contig349	NA	NA	NA	k__Bacteria (UID203)	5449	104	58	99	5	0	0	0	0	3.43	0	0	3682380	44	4997564	31589590	44	8
AOR_Tryc_subflye_sample08	tryc	subflye	sample08	AOR	flye	sub	tryc_subflye_sample08_contig374	contig374	NA	NA	NA	root (UID1)	5656	56	24	56	0	0	0	0	0	0	0	0	5685	44	4997564	31589590	44	8
AOR_Tryc_subflye_sample08	tryc	subflye	sample08	AOR	flye	sub	tryc_subflye_sample08_contig390	contig390	NA	NA	NA	root (UID1)	5656	56	24	56	0	0	0	0	0	0	0	0	3207	44	4997564	31589590	44	8
AOR_Tryc_subflye_sample08	tryc	subflye	sample08	AOR	flye	sub	tryc_subflye_sample08_contig396	contig396	d__Bacteria;p__Chloroflexota	d__Bacteria	p__Chloroflexota	k__Bacteria (UID1452)	924	163	110	40	122	1	0	0	0	70.95	0.91	0	4657532	44	4997564	31589590	44	8
AOR_Tryc_subflye_sample08	tryc	subflye	sample08	AOR	flye	sub	tryc_subflye_sample08_contig447	contig447	NA	NA	NA	root (UID1)	5656	56	24	56	0	0	0	0	0	0	0	0	19850	44	4997564	31589590	44	8
AOR_Tryc_subflye_sample08	tryc	subflye	sample08	AOR	flye	sub	tryc_subflye_sample08_contig46	contig46	d__Bacteria;p__Planctomycetota	d__Bacteria	p__Planctomycetota	k__Bacteria (UID2565)	2921	143	88	34	108	1	0	0	0	70.85	0.07	0	4997564	44	4997564	31589590	44	8
AOR_Tryc_subflye_sample08	tryc	subflye	sample08	AOR	flye	sub	tryc_subflye_sample08_contig48	contig48	d__Bacteria;p__Proteobacteria	d__Bacteria	p__Proteobacteria	o__Rhizobiales (UID3447)	356	408	244	65	343	0	0	0	0	81.1	0	0	4243443	44	4997564	31589590	44	8
AOR_Tryc_subflye_sample08	tryc	subflye	sample08	AOR	flye	sub	tryc_subflye_sample08_contig542	contig542	d__Bacteria;p__Bacteroidota	d__Bacteria	p__Bacteroidota	p__Bacteroidetes (UID2605)	350	316	210	104	206	4	2	0	0	61.77	2.3	0	3166329	44	4997564	31589590	44	8
AOR_Tryc_subflye_sample08	tryc	subflye	sample08	AOR	flye	sub	tryc_subflye_sample08_contig613	contig613	NA	NA	NA	root (UID1)	5656	56	24	56	0	0	0	0	0	0	0	0	9982	44	4997564	31589590	44	8
AOR_Tryc_subflye_sample08	tryc	subflye	sample08	AOR	flye	sub	tryc_subflye_sample08_contig674	contig674	NA	NA	NA	root (UID1)	5656	56	24	56	0	0	0	0	0	0	0	0	5392	44	4997564	31589590	44	8
AOR_Tryc_subflye_sample08	tryc	subflye	sample08	AOR	flye	sub	tryc_subflye_sample08_contig675	contig675	NA	NA	NA	root (UID1)	5656	56	24	56	0	0	0	0	0	0	0	0	6101	44	4997564	31589590	44	8
AOR_Tryc_subflye_sample08	tryc	subflye	sample08	AOR	flye	sub	tryc_subflye_sample08_contig690	contig690	NA	NA	NA	root (UID1)	5656	56	24	56	0	0	0	0	0	0	0	0	4014	44	4997564	31589590	44	8
AOR_Tryc_subflye_sample08	tryc	subflye	sample08	AOR	flye	sub	tryc_subflye_sample08_contig714	contig714	NA	NA	NA	root (UID1)	5656	56	24	56	0	0	0	0	0	0	0	0	9001	44	4997564	31589590	44	8
AOR_Tryc_subflye_sample08	tryc	subflye	sample08	AOR	flye	sub	tryc_subflye_sample08_contig807	contig807	NA	NA	NA	root (UID1)	5656	56	24	56	0	0	0	0	0	0	0	0	26815	44	4997564	31589590	44	8
AOR_Tryc_subflye_sample08	tryc	subflye	sample08	AOR	flye	sub	tryc_subflye_sample08_contig808	contig808	NA	NA	NA	root (UID1)	5656	56	24	56	0	0	0	0	0	0	0	0	4480	44	4997564	31589590	44	8
AOR_Tryc_subflye_sample08	tryc	subflye	sample08	AOR	flye	sub	tryc_subflye_sample08_contig817	contig817	NA	NA	NA	root (UID1)	5656	56	24	56	0	0	0	0	0	0	0	0	4894	44	4997564	31589590	44	8
AOR_Tryc_subflye_sample08	tryc	subflye	sample08	AOR	flye	sub	tryc_subflye_sample08_contig841	contig841	NA	NA	NA	root (UID1)	5656	56	24	56	0	0	0	0	0	0	0	0	20314	44	4997564	31589590	44	8
AOR_Tryc_subflye_sample08	tryc	subflye	sample08	AOR	flye	sub	tryc_subflye_sample08_contig897	contig897	NA	NA	NA	root (UID1)	5656	56	24	56	0	0	0	0	0	0	0	0	5865	44	4997564	31589590	44	8
AOR_Tryc_subflye_sample08	tryc	subflye	sample08	AOR	flye	sub	tryc_subflye_sample08_contig914	contig914	NA	NA	NA	root (UID1)	5656	56	24	56	0	0	0	0	0	0	0	0	8179	44	4997564	31589590	44	8
AOR_Tryc_subflye_sample08	tryc	subflye	sample08	AOR	flye	sub	tryc_subflye_sample08_contig950	contig950	NA	NA	NA	root (UID1)	5656	56	24	56	0	0	0	0	0	0	0	0	40454	44	4997564	31589590	44	8
AOR_Tryc_subflye_sample09	tryc	subflye	sample09	AOR	flye	sub	tryc_subflye_sample09_contig1118	contig1118	d__Bacteria;p__Bacteroidota	d__Bacteria	p__Bacteroidota	p__Bacteroidetes (UID2605)	350	316	210	112	199	4	1	0	0	58.24	1.35	0	3166528	33	4997815	22359737	33	5
AOR_Tryc_subflye_sample09	tryc	subflye	sample09	AOR	flye	sub	tryc_subflye_sample09_contig1447	contig1447	NA	NA	NA	root (UID1)	5656	56	24	56	0	0	0	0	0	0	0	0	32610	33	4997815	22359737	33	5
AOR_Tryc_subflye_sample09	tryc	subflye	sample09	AOR	flye	sub	tryc_subflye_sample09_contig1467	contig1467	NA	NA	NA	root (UID1)	5656	56	24	56	0	0	0	0	0	0	0	0	5611	33	4997815	22359737	33	5
AOR_Tryc_subflye_sample09	tryc	subflye	sample09	AOR	flye	sub	tryc_subflye_sample09_contig1481	contig1481	NA	NA	NA	k__Bacteria (UID203)	5449	104	58	95	9	0	0	0	0	3.24	0	0	26311	33	4997815	22359737	33	5
AOR_Tryc_subflye_sample09	tryc	subflye	sample09	AOR	flye	sub	tryc_subflye_sample09_contig1486	contig1486	NA	NA	NA	root (UID1)	5656	56	24	56	0	0	0	0	0	0	0	0	4268	33	4997815	22359737	33	5
AOR_Tryc_subflye_sample09	tryc	subflye	sample09	AOR	flye	sub	tryc_subflye_sample09_contig1492	contig1492	NA	NA	NA	root (UID1)	5656	56	24	56	0	0	0	0	0	0	0	0	25076	33	4997815	22359737	33	5
AOR_Tryc_subflye_sample09	tryc	subflye	sample09	AOR	flye	sub	tryc_subflye_sample09_contig1496	contig1496	NA	NA	NA	root (UID1)	5656	56	24	56	0	0	0	0	0	0	0	0	14980	33	4997815	22359737	33	5
AOR_Tryc_subflye_sample09	tryc	subflye	sample09	AOR	flye	sub	tryc_subflye_sample09_contig1511	contig1511	NA	NA	NA	root (UID1)	5656	56	24	56	0	0	0	0	0	0	0	0	223066	33	4997815	22359737	33	5
AOR_Tryc_subflye_sample09	tryc	subflye	sample09	AOR	flye	sub	tryc_subflye_sample09_contig1515	contig1515	NA	NA	NA	root (UID1)	5656	56	24	56	0	0	0	0	0	0	0	0	23198	33	4997815	22359737	33	5
AOR_Tryc_subflye_sample09	tryc	subflye	sample09	AOR	flye	sub	tryc_subflye_sample09_contig1518	contig1518	NA	NA	NA	root (UID1)	5656	56	24	56	0	0	0	0	0	0	0	0	15502	33	4997815	22359737	33	5
AOR_Tryc_subflye_sample09	tryc	subflye	sample09	AOR	flye	sub	tryc_subflye_sample09_contig1522	contig1522	NA	NA	NA	root (UID1)	5656	56	24	56	0	0	0	0	0	0	0	0	22363	33	4997815	22359737	33	5
AOR_Tryc_subflye_sample09	tryc	subflye	sample09	AOR	flye	sub	tryc_subflye_sample09_contig1525	contig1525	NA	NA	NA	root (UID1)	5656	56	24	56	0	0	0	0	0	0	0	0	44008	33	4997815	22359737	33	5
AOR_Tryc_subflye_sample09	tryc	subflye	sample09	AOR	flye	sub	tryc_subflye_sample09_contig1529	contig1529	NA	NA	NA	root (UID1)	5656	56	24	56	0	0	0	0	0	0	0	0	18218	33	4997815	22359737	33	5
AOR_Tryc_subflye_sample09	tryc	subflye	sample09	AOR	flye	sub	tryc_subflye_sample09_contig1532	contig1532	NA	NA	NA	root (UID1)	5656	56	24	56	0	0	0	0	0	0	0	0	11347	33	4997815	22359737	33	5
AOR_Tryc_subflye_sample09	tryc	subflye	sample09	AOR	flye	sub	tryc_subflye_sample09_contig20	contig20	NA	NA	NA	root (UID1)	5656	56	24	56	0	0	0	0	0	0	0	0	40474	33	4997815	22359737	33	5
AOR_Tryc_subflye_sample09	tryc	subflye	sample09	AOR	flye	sub	tryc_subflye_sample09_contig25	contig25	NA	NA	NA	root (UID1)	5656	56	24	56	0	0	0	0	0	0	0	0	18076	33	4997815	22359737	33	5
AOR_Tryc_subflye_sample09	tryc	subflye	sample09	AOR	flye	sub	tryc_subflye_sample09_contig3	contig3	d__Bacteria;p__Nitrospirota	d__Bacteria	p__Nitrospirota	k__Bacteria (UID3187)	2258	181	110	40	138	3	0	0	0	74.66	2.73	0	4375360	33	4997815	22359737	33	5
AOR_Tryc_subflye_sample09	tryc	subflye	sample09	AOR	flye	sub	tryc_subflye_sample09_contig332	contig332	NA	NA	NA	root (UID1)	5656	56	24	56	0	0	0	0	0	0	0	0	8271	33	4997815	22359737	33	5
AOR_Tryc_subflye_sample09	tryc	subflye	sample09	AOR	flye	sub	tryc_subflye_sample09_contig358	contig358	d__Bacteria;p__Proteobacteria	d__Bacteria	p__Proteobacteria	o__Rhizobiales (UID3447)	356	408	244	74	333	1	0	0	0	80.65	0.41	0	4243707	33	4997815	22359737	33	5
AOR_Tryc_subflye_sample09	tryc	subflye	sample09	AOR	flye	sub	tryc_subflye_sample09_contig365	contig365	d__Bacteria;p__Chloroflexota	d__Bacteria	p__Chloroflexota	k__Bacteria (UID1452)	924	163	110	38	124	1	0	0	0	71.61	0.91	0	4657454	33	4997815	22359737	33	5
AOR_Tryc_subflye_sample09	tryc	subflye	sample09	AOR	flye	sub	tryc_subflye_sample09_contig389	contig389	NA	NA	NA	root (UID1)	5656	56	24	56	0	0	0	0	0	0	0	0	10186	33	4997815	22359737	33	5
AOR_Tryc_subflye_sample09	tryc	subflye	sample09	AOR	flye	sub	tryc_subflye_sample09_contig393	contig393	NA	NA	NA	root (UID1)	5656	56	24	56	0	0	0	0	0	0	0	0	19800	33	4997815	22359737	33	5
AOR_Tryc_subflye_sample09	tryc	subflye	sample09	AOR	flye	sub	tryc_subflye_sample09_contig5	contig5	NA	NA	NA	root (UID1)	5656	56	24	56	0	0	0	0	0	0	0	0	9010	33	4997815	22359737	33	5
AOR_Tryc_subflye_sample09	tryc	subflye	sample09	AOR	flye	sub	tryc_subflye_sample09_contig508	contig508	NA	NA	NA	root (UID1)	5656	56	24	56	0	0	0	0	0	0	0	0	5088	33	4997815	22359737	33	5
AOR_Tryc_subflye_sample09	tryc	subflye	sample09	AOR	flye	sub	tryc_subflye_sample09_contig536	contig536	NA	NA	NA	root (UID1)	5656	56	24	56	0	0	0	0	0	0	0	0	77532	33	4997815	22359737	33	5
AOR_Tryc_subflye_sample09	tryc	subflye	sample09	AOR	flye	sub	tryc_subflye_sample09_contig55	contig55	NA	NA	NA	root (UID1)	5656	56	24	56	0	0	0	0	0	0	0	0	92241	33	4997815	22359737	33	5
AOR_Tryc_subflye_sample09	tryc	subflye	sample09	AOR	flye	sub	tryc_subflye_sample09_contig560	contig560	NA	NA	NA	root (UID1)	5656	56	24	56	0	0	0	0	0	0	0	0	3848	33	4997815	22359737	33	5
AOR_Tryc_subflye_sample09	tryc	subflye	sample09	AOR	flye	sub	tryc_subflye_sample09_contig627	contig627	NA	NA	NA	root (UID1)	5656	56	24	56	0	0	0	0	0	0	0	0	4016	33	4997815	22359737	33	5
AOR_Tryc_subflye_sample09	tryc	subflye	sample09	AOR	flye	sub	tryc_subflye_sample09_contig737	contig737	NA	NA	NA	root (UID1)	5656	56	24	56	0	0	0	0	0	0	0	0	130006	33	4997815	22359737	33	5
AOR_Tryc_subflye_sample09	tryc	subflye	sample09	AOR	flye	sub	tryc_subflye_sample09_contig751	contig751	NA	NA	NA	root (UID1)	5656	56	24	56	0	0	0	0	0	0	0	0	7602	33	4997815	22359737	33	5
AOR_Tryc_subflye_sample09	tryc	subflye	sample09	AOR	flye	sub	tryc_subflye_sample09_contig778	contig778	NA	NA	NA	root (UID1)	5656	56	24	56	0	0	0	0	0	0	0	0	5863	33	4997815	22359737	33	5
AOR_Tryc_subflye_sample09	tryc	subflye	sample09	AOR	flye	sub	tryc_subflye_sample09_contig943	contig943	NA	NA	NA	root (UID1)	5656	56	24	56	0	0	0	0	0	0	0	0	20302	33	4997815	22359737	33	5
AOR_Tryc_subflye_sample09	tryc	subflye	sample09	AOR	flye	sub	tryc_subflye_sample09_contig96	contig96	d__Bacteria;p__Planctomycetota	d__Bacteria	p__Planctomycetota	k__Bacteria (UID2565)	2921	143	88	31	111	1	0	0	0	69.99	0.07	0	4997815	33	4997815	22359737	33	5
AOR_Tryc_subflye_sample10	tryc	subflye	sample10	AOR	flye	sub	tryc_subflye_sample10_contig1019	contig1019	NA	NA	NA	root (UID1)	5656	56	24	56	0	0	0	0	0	0	0	0	4892	43	4997692	27745900	43	7
AOR_Tryc_subflye_sample10	tryc	subflye	sample10	AOR	flye	sub	tryc_subflye_sample10_contig1038	contig1038	NA	NA	NA	root (UID1)	5656	56	24	56	0	0	0	0	0	0	0	0	77500	43	4997692	27745900	43	7
AOR_Tryc_subflye_sample10	tryc	subflye	sample10	AOR	flye	sub	tryc_subflye_sample10_contig116	contig116	NA	NA	NA	root (UID1)	5656	56	24	56	0	0	0	0	0	0	0	0	9989	43	4997692	27745900	43	7
AOR_Tryc_subflye_sample10	tryc	subflye	sample10	AOR	flye	sub	tryc_subflye_sample10_contig1172	contig1172	NA	NA	NA	root (UID1)	5656	56	24	56	0	0	0	0	0	0	0	0	20314	43	4997692	27745900	43	7
AOR_Tryc_subflye_sample10	tryc	subflye	sample10	AOR	flye	sub	tryc_subflye_sample10_contig1283	contig1283	NA	NA	NA	root (UID1)	5656	56	24	56	0	0	0	0	0	0	0	0	7578	43	4997692	27745900	43	7
AOR_Tryc_subflye_sample10	tryc	subflye	sample10	AOR	flye	sub	tryc_subflye_sample10_contig129	contig129	d__Bacteria;p__Nitrospirota	d__Bacteria	p__Nitrospirota	k__Bacteria (UID3187)	2258	181	110	40	136	5	0	0	0	74.78	3.86	0	4354786	43	4997692	27745900	43	7
AOR_Tryc_subflye_sample10	tryc	subflye	sample10	AOR	flye	sub	tryc_subflye_sample10_contig134	contig134	NA	NA	NA	root (UID1)	5656	56	24	56	0	0	0	0	0	0	0	0	6398	43	4997692	27745900	43	7
AOR_Tryc_subflye_sample10	tryc	subflye	sample10	AOR	flye	sub	tryc_subflye_sample10_contig1434	contig1434	NA	NA	NA	root (UID1)	5656	56	24	56	0	0	0	0	0	0	0	0	2426	43	4997692	27745900	43	7
AOR_Tryc_subflye_sample10	tryc	subflye	sample10	AOR	flye	sub	tryc_subflye_sample10_contig1467	contig1467	NA	NA	NA	root (UID1)	5656	56	24	56	0	0	0	0	0	0	0	0	19516	43	4997692	27745900	43	7
AOR_Tryc_subflye_sample10	tryc	subflye	sample10	AOR	flye	sub	tryc_subflye_sample10_contig1564	contig1564	NA	NA	NA	root (UID1)	5656	56	24	56	0	0	0	0	0	0	0	0	25052	43	4997692	27745900	43	7
AOR_Tryc_subflye_sample10	tryc	subflye	sample10	AOR	flye	sub	tryc_subflye_sample10_contig1581	contig1581	NA	NA	NA	root (UID1)	5656	56	24	56	0	0	0	0	0	0	0	0	223081	43	4997692	27745900	43	7
AOR_Tryc_subflye_sample10	tryc	subflye	sample10	AOR	flye	sub	tryc_subflye_sample10_contig1595	contig1595	NA	NA	NA	root (UID1)	5656	56	24	56	0	0	0	0	0	0	0	0	11356	43	4997692	27745900	43	7
AOR_Tryc_subflye_sample10	tryc	subflye	sample10	AOR	flye	sub	tryc_subflye_sample10_contig1597	contig1597	NA	NA	NA	root (UID1)	5656	56	24	56	0	0	0	0	0	0	0	0	23195	43	4997692	27745900	43	7
AOR_Tryc_subflye_sample10	tryc	subflye	sample10	AOR	flye	sub	tryc_subflye_sample10_contig1598	contig1598	NA	NA	NA	root (UID1)	5656	56	24	56	0	0	0	0	0	0	0	0	44012	43	4997692	27745900	43	7
AOR_Tryc_subflye_sample10	tryc	subflye	sample10	AOR	flye	sub	tryc_subflye_sample10_contig1600	contig1600	NA	NA	NA	root (UID1)	5656	56	24	56	0	0	0	0	0	0	0	0	4261	43	4997692	27745900	43	7
AOR_Tryc_subflye_sample10	tryc	subflye	sample10	AOR	flye	sub	tryc_subflye_sample10_contig1601	contig1601	NA	NA	NA	root (UID1)	5656	56	24	56	0	0	0	0	0	0	0	0	19939	43	4997692	27745900	43	7
AOR_Tryc_subflye_sample10	tryc	subflye	sample10	AOR	flye	sub	tryc_subflye_sample10_contig1602	contig1602	NA	NA	NA	root (UID1)	5656	56	24	56	0	0	0	0	0	0	0	0	22366	43	4997692	27745900	43	7
AOR_Tryc_subflye_sample10	tryc	subflye	sample10	AOR	flye	sub	tryc_subflye_sample10_contig1603	contig1603	NA	NA	NA	root (UID1)	5656	56	24	56	0	0	0	0	0	0	0	0	18221	43	4997692	27745900	43	7
AOR_Tryc_subflye_sample10	tryc	subflye	sample10	AOR	flye	sub	tryc_subflye_sample10_contig180	contig180	NA	NA	NA	root (UID1)	5656	56	24	56	0	0	0	0	0	0	0	0	919	43	4997692	27745900	43	7
AOR_Tryc_subflye_sample10	tryc	subflye	sample10	AOR	flye	sub	tryc_subflye_sample10_contig23	contig23	NA	NA	NA	root (UID1)	5656	56	24	56	0	0	0	0	0	0	0	0	4163	43	4997692	27745900	43	7
AOR_Tryc_subflye_sample10	tryc	subflye	sample10	AOR	flye	sub	tryc_subflye_sample10_contig244	contig244	d__Bacteria;p__Chloroflexota	d__Bacteria	p__Chloroflexota	k__Bacteria (UID1452)	924	163	110	37	125	1	0	0	0	72.69	0.91	0	4657442	43	4997692	27745900	43	7
AOR_Tryc_subflye_sample10	tryc	subflye	sample10	AOR	flye	sub	tryc_subflye_sample10_contig249	contig249	d__Bacteria;p__Planctomycetota	d__Bacteria	p__Planctomycetota	k__Bacteria (UID2565)	2921	143	88	36	107	0	0	0	0	70.57	0	0	4997692	43	4997692	27745900	43	7
AOR_Tryc_subflye_sample10	tryc	subflye	sample10	AOR	flye	sub	tryc_subflye_sample10_contig323	contig323	NA	NA	NA	root (UID1)	5656	56	24	56	0	0	0	0	0	0	0	0	243980	43	4997692	27745900	43	7
AOR_Tryc_subflye_sample10	tryc	subflye	sample10	AOR	flye	sub	tryc_subflye_sample10_contig344	contig344	NA	NA	NA	root (UID1)	5656	56	24	56	0	0	0	0	0	0	0	0	655	43	4997692	27745900	43	7
AOR_Tryc_subflye_sample10	tryc	subflye	sample10	AOR	flye	sub	tryc_subflye_sample10_contig345	contig345	NA	NA	NA	root (UID1)	5656	56	24	56	0	0	0	0	0	0	0	0	130106	43	4997692	27745900	43	7
AOR_Tryc_subflye_sample10	tryc	subflye	sample10	AOR	flye	sub	tryc_subflye_sample10_contig349	contig349	NA	NA	NA	root (UID1)	5656	56	24	56	0	0	0	0	0	0	0	0	83770	43	4997692	27745900	43	7
AOR_Tryc_subflye_sample10	tryc	subflye	sample10	AOR	flye	sub	tryc_subflye_sample10_contig361	contig361	NA	NA	NA	root (UID1)	5656	56	24	56	0	0	0	0	0	0	0	0	1580	43	4997692	27745900	43	7
AOR_Tryc_subflye_sample10	tryc	subflye	sample10	AOR	flye	sub	tryc_subflye_sample10_contig379	contig379	NA	NA	NA	root (UID1)	5656	56	24	56	0	0	0	0	0	0	0	0	39333	43	4997692	27745900	43	7
AOR_Tryc_subflye_sample10	tryc	subflye	sample10	AOR	flye	sub	tryc_subflye_sample10_contig417	contig417	NA	NA	NA	root (UID1)	5656	56	24	56	0	0	0	0	0	0	0	0	8624	43	4997692	27745900	43	7
AOR_Tryc_subflye_sample10	tryc	subflye	sample10	AOR	flye	sub	tryc_subflye_sample10_contig454	contig454	NA	NA	NA	root (UID1)	5656	56	24	56	0	0	0	0	0	0	0	0	3819	43	4997692	27745900	43	7
AOR_Tryc_subflye_sample10	tryc	subflye	sample10	AOR	flye	sub	tryc_subflye_sample10_contig529	contig529	d__Bacteria;p__Bacteroidota	d__Bacteria	p__Bacteroidota	p__Bacteroidetes (UID2605)	350	316	210	111	197	7	0	1	0	57.56	2.7	0	3169190	43	4997692	27745900	43	7
AOR_Tryc_subflye_sample10	tryc	subflye	sample10	AOR	flye	sub	tryc_subflye_sample10_contig653	contig653	d__Bacteria;p__Patescibacteria	d__Bacteria	p__Patescibacteria	k__Bacteria (UID1453)	901	171	117	106	65	0	0	0	0	32.76	0	0	1437293	43	4997692	27745900	43	7
AOR_Tryc_subflye_sample10	tryc	subflye	sample10	AOR	flye	sub	tryc_subflye_sample10_contig679	contig679	NA	NA	NA	root (UID1)	5656	56	24	56	0	0	0	0	0	0	0	0	11472	43	4997692	27745900	43	7
AOR_Tryc_subflye_sample10	tryc	subflye	sample10	AOR	flye	sub	tryc_subflye_sample10_contig69	contig69	NA	NA	NA	k__Bacteria (UID203)	5449	104	58	92	12	0	0	0	0	12.7	0	0	3685125	43	4997692	27745900	43	7
AOR_Tryc_subflye_sample10	tryc	subflye	sample10	AOR	flye	sub	tryc_subflye_sample10_contig794	contig794	NA	NA	NA	root (UID1)	5656	56	24	56	0	0	0	0	0	0	0	0	1085	43	4997692	27745900	43	7
AOR_Tryc_subflye_sample10	tryc	subflye	sample10	AOR	flye	sub	tryc_subflye_sample10_contig85	contig85	d__Bacteria;p__Proteobacteria	d__Bacteria	p__Proteobacteria	o__Rhizobiales (UID3447)	356	408	244	70	337	1	0	0	0	80.89	0.41	0	4243601	43	4997692	27745900	43	7
AOR_Tryc_subflye_sample10	tryc	subflye	sample10	AOR	flye	sub	tryc_subflye_sample10_contig867	contig867	NA	NA	NA	root (UID1)	5656	56	24	56	0	0	0	0	0	0	0	0	8262	43	4997692	27745900	43	7
AOR_Tryc_subflye_sample10	tryc	subflye	sample10	AOR	flye	sub	tryc_subflye_sample10_contig889	contig889	NA	NA	NA	root (UID1)	5656	56	24	56	0	0	0	0	0	0	0	0	14056	43	4997692	27745900	43	7
AOR_Tryc_subflye_sample10	tryc	subflye	sample10	AOR	flye	sub	tryc_subflye_sample10_contig922	contig922	NA	NA	NA	root (UID1)	5656	56	24	56	0	0	0	0	0	0	0	0	5873	43	4997692	27745900	43	7
AOR_Tryc_subflye_sample10	tryc	subflye	sample10	AOR	flye	sub	tryc_subflye_sample10_contig927	contig927	NA	NA	NA	root (UID1)	5656	56	24	56	0	0	0	0	0	0	0	0	9009	43	4997692	27745900	43	7
AOR_Tryc_subflye_sample10	tryc	subflye	sample10	AOR	flye	sub	tryc_subflye_sample10_contig933	contig933	NA	NA	NA	root (UID1)	5656	56	24	56	0	0	0	0	0	0	0	0	18077	43	4997692	27745900	43	7
AOR_Tryc_subflye_sample10	tryc	subflye	sample10	AOR	flye	sub	tryc_subflye_sample10_contig934	contig934	NA	NA	NA	root (UID1)	5656	56	24	56	0	0	0	0	0	0	0	0	35407	43	4997692	27745900	43	7
AOR_Tryc_subflye_sample10	tryc	subflye	sample10	AOR	flye	sub	tryc_subflye_sample10_contig937	contig937	NA	NA	NA	root (UID1)	5656	56	24	56	0	0	0	0	0	0	0	0	40485	43	4997692	27745900	43	7
AOR_Tryc_subflye_sample11	tryc	subflye	sample11	AOR	flye	sub	tryc_subflye_sample11_contig1017	contig1017	NA	NA	NA	k__Bacteria (UID203)	5449	104	58	93	11	0	0	0	0	11.9	0	0	3682350	40	4997617	27575709	40	7
AOR_Tryc_subflye_sample11	tryc	subflye	sample11	AOR	flye	sub	tryc_subflye_sample11_contig1091	contig1091	NA	NA	NA	root (UID1)	5656	56	24	56	0	0	0	0	0	0	0	0	12240	40	4997617	27575709	40	7
AOR_Tryc_subflye_sample11	tryc	subflye	sample11	AOR	flye	sub	tryc_subflye_sample11_contig1112	contig1112	NA	NA	NA	root (UID1)	5656	56	24	56	0	0	0	0	0	0	0	0	11476	40	4997617	27575709	40	7
AOR_Tryc_subflye_sample11	tryc	subflye	sample11	AOR	flye	sub	tryc_subflye_sample11_contig1284	contig1284	NA	NA	NA	root (UID1)	5656	56	24	56	0	0	0	0	0	0	0	0	40474	40	4997617	27575709	40	7
AOR_Tryc_subflye_sample11	tryc	subflye	sample11	AOR	flye	sub	tryc_subflye_sample11_contig1285	contig1285	NA	NA	NA	root (UID1)	5656	56	24	56	0	0	0	0	0	0	0	0	35376	40	4997617	27575709	40	7
AOR_Tryc_subflye_sample11	tryc	subflye	sample11	AOR	flye	sub	tryc_subflye_sample11_contig1358	contig1358	NA	NA	NA	root (UID1)	5656	56	24	56	0	0	0	0	0	0	0	0	8171	40	4997617	27575709	40	7
AOR_Tryc_subflye_sample11	tryc	subflye	sample11	AOR	flye	sub	tryc_subflye_sample11_contig1553	contig1553	NA	NA	NA	root (UID1)	5656	56	24	56	0	0	0	0	0	0	0	0	11356	40	4997617	27575709	40	7
AOR_Tryc_subflye_sample11	tryc	subflye	sample11	AOR	flye	sub	tryc_subflye_sample11_contig1562	contig1562	NA	NA	NA	root (UID1)	5656	56	24	56	0	0	0	0	0	0	0	0	44028	40	4997617	27575709	40	7
AOR_Tryc_subflye_sample11	tryc	subflye	sample11	AOR	flye	sub	tryc_subflye_sample11_contig1566	contig1566	NA	NA	NA	root (UID1)	5656	56	24	56	0	0	0	0	0	0	0	0	223146	40	4997617	27575709	40	7
AOR_Tryc_subflye_sample11	tryc	subflye	sample11	AOR	flye	sub	tryc_subflye_sample11_contig1575	contig1575	d__Bacteria;p__Bacteroidota	d__Bacteria	p__Bacteroidota	p__Bacteroidetes (UID2605)	350	316	210	107	202	6	1	0	0	61.17	1.98	0	3166775	40	4997617	27575709	40	7
AOR_Tryc_subflye_sample11	tryc	subflye	sample11	AOR	flye	sub	tryc_subflye_sample11_contig1584	contig1584	NA	NA	NA	root (UID1)	5656	56	24	56	0	0	0	0	0	0	0	0	11315	40	4997617	27575709	40	7
AOR_Tryc_subflye_sample11	tryc	subflye	sample11	AOR	flye	sub	tryc_subflye_sample11_contig1600	contig1600	NA	NA	NA	root (UID1)	5656	56	24	56	0	0	0	0	0	0	0	0	25057	40	4997617	27575709	40	7
AOR_Tryc_subflye_sample11	tryc	subflye	sample11	AOR	flye	sub	tryc_subflye_sample11_contig1626	contig1626	NA	NA	NA	k__Bacteria (UID203)	5449	103	57	97	6	0	0	0	0	1.15	0	0	39073	40	4997617	27575709	40	7
AOR_Tryc_subflye_sample11	tryc	subflye	sample11	AOR	flye	sub	tryc_subflye_sample11_contig1636	contig1636	NA	NA	NA	root (UID1)	5656	56	24	56	0	0	0	0	0	0	0	0	32583	40	4997617	27575709	40	7
AOR_Tryc_subflye_sample11	tryc	subflye	sample11	AOR	flye	sub	tryc_subflye_sample11_contig1637	contig1637	NA	NA	NA	root (UID1)	5656	56	24	56	0	0	0	0	0	0	0	0	22363	40	4997617	27575709	40	7
AOR_Tryc_subflye_sample11	tryc	subflye	sample11	AOR	flye	sub	tryc_subflye_sample11_contig181	contig181	NA	NA	NA	root (UID1)	5656	56	24	56	0	0	0	0	0	0	0	0	4539	40	4997617	27575709	40	7
AOR_Tryc_subflye_sample11	tryc	subflye	sample11	AOR	flye	sub	tryc_subflye_sample11_contig182	contig182	NA	NA	NA	root (UID1)	5656	56	24	56	0	0	0	0	0	0	0	0	15568	40	4997617	27575709	40	7
AOR_Tryc_subflye_sample11	tryc	subflye	sample11	AOR	flye	sub	tryc_subflye_sample11_contig193	contig193	d__Bacteria;p__Nitrospirota	d__Bacteria	p__Nitrospirota	k__Bacteria (UID3187)	2258	181	110	42	134	5	0	0	0	75.53	3.14	0	4340195	40	4997617	27575709	40	7
AOR_Tryc_subflye_sample11	tryc	subflye	sample11	AOR	flye	sub	tryc_subflye_sample11_contig194	contig194	NA	NA	NA	root (UID1)	5656	56	24	56	0	0	0	0	0	0	0	0	14628	40	4997617	27575709	40	7
AOR_Tryc_subflye_sample11	tryc	subflye	sample11	AOR	flye	sub	tryc_subflye_sample11_contig20	contig20	NA	NA	NA	root (UID1)	5656	56	24	56	0	0	0	0	0	0	0	0	4887	40	4997617	27575709	40	7
AOR_Tryc_subflye_sample11	tryc	subflye	sample11	AOR	flye	sub	tryc_subflye_sample11_contig25	contig25	d__Bacteria;p__Proteobacteria	d__Bacteria	p__Proteobacteria	o__Rhizobiales (UID3447)	356	408	244	69	338	1	0	0	0	82.25	0.41	0	4243658	40	4997617	27575709	40	7
AOR_Tryc_subflye_sample11	tryc	subflye	sample11	AOR	flye	sub	tryc_subflye_sample11_contig299	contig299	d__Bacteria;p__Chloroflexota	d__Bacteria	p__Chloroflexota	k__Bacteria (UID1452)	924	163	110	50	111	2	0	0	0	64.76	1.01	0	4657526	40	4997617	27575709	40	7
AOR_Tryc_subflye_sample11	tryc	subflye	sample11	AOR	flye	sub	tryc_subflye_sample11_contig310	contig310	NA	NA	NA	root (UID1)	5656	56	24	56	0	0	0	0	0	0	0	0	18214	40	4997617	27575709	40	7
AOR_Tryc_subflye_sample11	tryc	subflye	sample11	AOR	flye	sub	tryc_subflye_sample11_contig322	contig322	NA	NA	NA	root (UID1)	5656	56	24	56	0	0	0	0	0	0	0	0	41244	40	4997617	27575709	40	7
AOR_Tryc_subflye_sample11	tryc	subflye	sample11	AOR	flye	sub	tryc_subflye_sample11_contig37	contig37	NA	NA	NA	root (UID1)	5656	56	24	56	0	0	0	0	0	0	0	0	77899	40	4997617	27575709	40	7
AOR_Tryc_subflye_sample11	tryc	subflye	sample11	AOR	flye	sub	tryc_subflye_sample11_contig388	contig388	NA	NA	NA	root (UID1)	5656	56	24	56	0	0	0	0	0	0	0	0	7600	40	4997617	27575709	40	7
AOR_Tryc_subflye_sample11	tryc	subflye	sample11	AOR	flye	sub	tryc_subflye_sample11_contig39	contig39	NA	NA	NA	root (UID1)	5656	56	24	56	0	0	0	0	0	0	0	0	23144	40	4997617	27575709	40	7
AOR_Tryc_subflye_sample11	tryc	subflye	sample11	AOR	flye	sub	tryc_subflye_sample11_contig397	contig397	d__Bacteria;p__Patescibacteria	d__Bacteria	p__Patescibacteria	k__Bacteria (UID1452)	924	151	101	81	70	0	0	0	0	40.63	0	0	1437397	40	4997617	27575709	40	7
AOR_Tryc_subflye_sample11	tryc	subflye	sample11	AOR	flye	sub	tryc_subflye_sample11_contig401	contig401	NA	NA	NA	root (UID1)	5656	56	24	56	0	0	0	0	0	0	0	0	18085	40	4997617	27575709	40	7
AOR_Tryc_subflye_sample11	tryc	subflye	sample11	AOR	flye	sub	tryc_subflye_sample11_contig444	contig444	NA	NA	NA	root (UID1)	5656	56	24	56	0	0	0	0	0	0	0	0	4160	40	4997617	27575709	40	7
AOR_Tryc_subflye_sample11	tryc	subflye	sample11	AOR	flye	sub	tryc_subflye_sample11_contig45	contig45	d__Bacteria;p__Planctomycetota	d__Bacteria	p__Planctomycetota	k__Bacteria (UID2565)	2921	143	88	39	104	0	0	0	0	68.48	0	0	4997617	40	4997617	27575709	40	7
AOR_Tryc_subflye_sample11	tryc	subflye	sample11	AOR	flye	sub	tryc_subflye_sample11_contig461	contig461	NA	NA	NA	root (UID1)	5656	56	24	56	0	0	0	0	0	0	0	0	4005	40	4997617	27575709	40	7
AOR_Tryc_subflye_sample11	tryc	subflye	sample11	AOR	flye	sub	tryc_subflye_sample11_contig505	contig505	NA	NA	NA	root (UID1)	5656	56	24	56	0	0	0	0	0	0	0	0	19653	40	4997617	27575709	40	7
AOR_Tryc_subflye_sample11	tryc	subflye	sample11	AOR	flye	sub	tryc_subflye_sample11_contig548	contig548	NA	NA	NA	root (UID1)	5656	56	24	56	0	0	0	0	0	0	0	0	3828	40	4997617	27575709	40	7
AOR_Tryc_subflye_sample11	tryc	subflye	sample11	AOR	flye	sub	tryc_subflye_sample11_contig627	contig627	NA	NA	NA	root (UID1)	5656	56	24	56	0	0	0	0	0	0	0	0	1347	40	4997617	27575709	40	7
AOR_Tryc_subflye_sample11	tryc	subflye	sample11	AOR	flye	sub	tryc_subflye_sample11_contig658	contig658	NA	NA	NA	root (UID1)	5656	56	24	56	0	0	0	0	0	0	0	0	243964	40	4997617	27575709	40	7
AOR_Tryc_subflye_sample11	tryc	subflye	sample11	AOR	flye	sub	tryc_subflye_sample11_contig784	contig784	NA	NA	NA	root (UID1)	5656	56	24	56	0	0	0	0	0	0	0	0	2424	40	4997617	27575709	40	7
AOR_Tryc_subflye_sample11	tryc	subflye	sample11	AOR	flye	sub	tryc_subflye_sample11_contig907	contig907	NA	NA	NA	root (UID1)	5656	56	24	56	0	0	0	0	0	0	0	0	2160	40	4997617	27575709	40	7
AOR_Tryc_subflye_sample11	tryc	subflye	sample11	AOR	flye	sub	tryc_subflye_sample11_contig965	contig965	NA	NA	NA	root (UID1)	5656	56	24	56	0	0	0	0	0	0	0	0	5869	40	4997617	27575709	40	7
AOR_Tryc_subflye_sample11	tryc	subflye	sample11	AOR	flye	sub	tryc_subflye_sample11_contig971	contig971	NA	NA	NA	root (UID1)	5656	56	24	56	0	0	0	0	0	0	0	0	20315	40	4997617	27575709	40	7
AOR_Tryc_subflye_sample12	tryc	subflye	sample12	AOR	flye	sub	tryc_subflye_sample12_contig1012	contig1012	NA	NA	NA	root (UID1)	5656	56	24	56	0	0	0	0	0	0	0	0	9372	38	4997560	22476377	38	5
AOR_Tryc_subflye_sample12	tryc	subflye	sample12	AOR	flye	sub	tryc_subflye_sample12_contig103	contig103	d__Bacteria;p__Proteobacteria	d__Bacteria	p__Proteobacteria	o__Rhizobiales (UID3447)	356	408	244	64	343	1	0	0	0	82.16	0.41	0	4243578	38	4997560	22476377	38	5
AOR_Tryc_subflye_sample12	tryc	subflye	sample12	AOR	flye	sub	tryc_subflye_sample12_contig1070	contig1070	NA	NA	NA	root (UID1)	5656	56	24	56	0	0	0	0	0	0	0	0	22365	38	4997560	22476377	38	5
AOR_Tryc_subflye_sample12	tryc	subflye	sample12	AOR	flye	sub	tryc_subflye_sample12_contig1122	contig1122	NA	NA	NA	root (UID1)	5656	56	24	56	0	0	0	0	0	0	0	0	35392	38	4997560	22476377	38	5
AOR_Tryc_subflye_sample12	tryc	subflye	sample12	AOR	flye	sub	tryc_subflye_sample12_contig1174	contig1174	NA	NA	NA	root (UID1)	5656	56	24	56	0	0	0	0	0	0	0	0	3835	38	4997560	22476377	38	5
AOR_Tryc_subflye_sample12	tryc	subflye	sample12	AOR	flye	sub	tryc_subflye_sample12_contig121	contig121	d__Bacteria;p__Nitrospirota	d__Bacteria	p__Nitrospirota	k__Bacteria (UID3187)	2258	181	110	40	137	4	0	0	0	75.96	2.95	0	4340147	38	4997560	22476377	38	5
AOR_Tryc_subflye_sample12	tryc	subflye	sample12	AOR	flye	sub	tryc_subflye_sample12_contig1214	contig1214	NA	NA	NA	root (UID1)	5656	56	24	56	0	0	0	0	0	0	0	0	3781	38	4997560	22476377	38	5
AOR_Tryc_subflye_sample12	tryc	subflye	sample12	AOR	flye	sub	tryc_subflye_sample12_contig1243	contig1243	NA	NA	NA	root (UID1)	5656	56	24	56	0	0	0	0	0	0	0	0	7577	38	4997560	22476377	38	5
AOR_Tryc_subflye_sample12	tryc	subflye	sample12	AOR	flye	sub	tryc_subflye_sample12_contig1311	contig1311	NA	NA	NA	root (UID1)	5656	56	24	56	0	0	0	0	0	0	0	0	92460	38	4997560	22476377	38	5
AOR_Tryc_subflye_sample12	tryc	subflye	sample12	AOR	flye	sub	tryc_subflye_sample12_contig132	contig132	d__Bacteria;p__Bacteroidota	d__Bacteria	p__Bacteroidota	p__Bacteroidetes (UID2605)	350	316	210	111	199	6	0	0	0	57.8	1.83	0	3178076	38	4997560	22476377	38	5
AOR_Tryc_subflye_sample12	tryc	subflye	sample12	AOR	flye	sub	tryc_subflye_sample12_contig1325	contig1325	NA	NA	NA	root (UID1)	5656	56	24	56	0	0	0	0	0	0	0	0	2160	38	4997560	22476377	38	5
AOR_Tryc_subflye_sample12	tryc	subflye	sample12	AOR	flye	sub	tryc_subflye_sample12_contig1474	contig1474	NA	NA	NA	root (UID1)	5656	56	24	56	0	0	0	0	0	0	0	0	24440	38	4997560	22476377	38	5
AOR_Tryc_subflye_sample12	tryc	subflye	sample12	AOR	flye	sub	tryc_subflye_sample12_contig1523	contig1523	NA	NA	NA	root (UID1)	5656	56	24	56	0	0	0	0	0	0	0	0	23131	38	4997560	22476377	38	5
AOR_Tryc_subflye_sample12	tryc	subflye	sample12	AOR	flye	sub	tryc_subflye_sample12_contig1575	contig1575	NA	NA	NA	root (UID1)	5656	56	24	56	0	0	0	0	0	0	0	0	11356	38	4997560	22476377	38	5
AOR_Tryc_subflye_sample12	tryc	subflye	sample12	AOR	flye	sub	tryc_subflye_sample12_contig1620	contig1620	NA	NA	NA	root (UID1)	5656	56	24	56	0	0	0	0	0	0	0	0	77527	38	4997560	22476377	38	5
AOR_Tryc_subflye_sample12	tryc	subflye	sample12	AOR	flye	sub	tryc_subflye_sample12_contig1637	contig1637	NA	NA	NA	root (UID1)	5656	56	24	56	0	0	0	0	0	0	0	0	9105	38	4997560	22476377	38	5
AOR_Tryc_subflye_sample12	tryc	subflye	sample12	AOR	flye	sub	tryc_subflye_sample12_contig1638	contig1638	NA	NA	NA	root (UID1)	5656	56	24	56	0	0	0	0	0	0	0	0	223070	38	4997560	22476377	38	5
AOR_Tryc_subflye_sample12	tryc	subflye	sample12	AOR	flye	sub	tryc_subflye_sample12_contig1639	contig1639	NA	NA	NA	root (UID1)	5656	56	24	56	0	0	0	0	0	0	0	0	44030	38	4997560	22476377	38	5
AOR_Tryc_subflye_sample12	tryc	subflye	sample12	AOR	flye	sub	tryc_subflye_sample12_contig1640	contig1640	NA	NA	NA	root (UID1)	5656	56	24	56	0	0	0	0	0	0	0	0	19560	38	4997560	22476377	38	5
AOR_Tryc_subflye_sample12	tryc	subflye	sample12	AOR	flye	sub	tryc_subflye_sample12_contig1651	contig1651	NA	NA	NA	k__Bacteria (UID203)	5449	104	58	97	7	0	0	0	0	1.99	0	0	39076	38	4997560	22476377	38	5
AOR_Tryc_subflye_sample12	tryc	subflye	sample12	AOR	flye	sub	tryc_subflye_sample12_contig1653	contig1653	NA	NA	NA	root (UID1)	5656	56	24	56	0	0	0	0	0	0	0	0	32611	38	4997560	22476377	38	5
AOR_Tryc_subflye_sample12	tryc	subflye	sample12	AOR	flye	sub	tryc_subflye_sample12_contig1655	contig1655	NA	NA	NA	root (UID1)	5656	56	24	56	0	0	0	0	0	0	0	0	26125	38	4997560	22476377	38	5
AOR_Tryc_subflye_sample12	tryc	subflye	sample12	AOR	flye	sub	tryc_subflye_sample12_contig187	contig187	NA	NA	NA	root (UID1)	5656	56	24	56	0	0	0	0	0	0	0	0	8179	38	4997560	22476377	38	5
AOR_Tryc_subflye_sample12	tryc	subflye	sample12	AOR	flye	sub	tryc_subflye_sample12_contig235	contig235	NA	NA	NA	root (UID1)	5656	56	24	56	0	0	0	0	0	0	0	0	5860	38	4997560	22476377	38	5
AOR_Tryc_subflye_sample12	tryc	subflye	sample12	AOR	flye	sub	tryc_subflye_sample12_contig239	contig239	NA	NA	NA	root (UID1)	5656	56	24	56	0	0	0	0	0	0	0	0	2439	38	4997560	22476377	38	5
AOR_Tryc_subflye_sample12	tryc	subflye	sample12	AOR	flye	sub	tryc_subflye_sample12_contig327	contig327	NA	NA	NA	root (UID1)	5656	56	24	56	0	0	0	0	0	0	0	0	4011	38	4997560	22476377	38	5
AOR_Tryc_subflye_sample12	tryc	subflye	sample12	AOR	flye	sub	tryc_subflye_sample12_contig350	contig350	NA	NA	NA	root (UID1)	5656	56	24	56	0	0	0	0	0	0	0	0	9961	38	4997560	22476377	38	5
AOR_Tryc_subflye_sample12	tryc	subflye	sample12	AOR	flye	sub	tryc_subflye_sample12_contig426	contig426	d__Bacteria;p__Chloroflexota	d__Bacteria	p__Chloroflexota	k__Bacteria (UID1452)	924	163	110	47	115	1	0	0	0	66.88	0.1	0	4657470	38	4997560	22476377	38	5
AOR_Tryc_subflye_sample12	tryc	subflye	sample12	AOR	flye	sub	tryc_subflye_sample12_contig487	contig487	NA	NA	NA	root (UID1)	5656	56	24	56	0	0	0	0	0	0	0	0	40472	38	4997560	22476377	38	5
AOR_Tryc_subflye_sample12	tryc	subflye	sample12	AOR	flye	sub	tryc_subflye_sample12_contig513	contig513	NA	NA	NA	root (UID1)	5656	56	24	56	0	0	0	0	0	0	0	0	83953	38	4997560	22476377	38	5
AOR_Tryc_subflye_sample12	tryc	subflye	sample12	AOR	flye	sub	tryc_subflye_sample12_contig68	contig68	d__Bacteria;p__Planctomycetota	d__Bacteria	p__Planctomycetota	k__Bacteria (UID2565)	2921	143	88	36	106	1	0	0	0	69.11	1.14	0	4997560	38	4997560	22476377	38	5
AOR_Tryc_subflye_sample12	tryc	subflye	sample12	AOR	flye	sub	tryc_subflye_sample12_contig805	contig805	NA	NA	NA	root (UID1)	5656	56	24	56	0	0	0	0	0	0	0	0	14633	38	4997560	22476377	38	5
AOR_Tryc_subflye_sample12	tryc	subflye	sample12	AOR	flye	sub	tryc_subflye_sample12_contig819	contig819	NA	NA	NA	root (UID1)	5656	56	24	56	0	0	0	0	0	0	0	0	4276	38	4997560	22476377	38	5
AOR_Tryc_subflye_sample12	tryc	subflye	sample12	AOR	flye	sub	tryc_subflye_sample12_contig90	contig90	NA	NA	NA	root (UID1)	5656	56	24	56	0	0	0	0	0	0	0	0	20304	38	4997560	22476377	38	5
AOR_Tryc_subflye_sample12	tryc	subflye	sample12	AOR	flye	sub	tryc_subflye_sample12_contig930	contig930	NA	NA	NA	root (UID1)	5656	56	24	56	0	0	0	0	0	0	0	0	6198	38	4997560	22476377	38	5
AOR_Tryc_subflye_sample12	tryc	subflye	sample12	AOR	flye	sub	tryc_subflye_sample12_contig940	contig940	NA	NA	NA	root (UID1)	5656	56	24	56	0	0	0	0	0	0	0	0	18098	38	4997560	22476377	38	5
AOR_Tryc_subflye_sample12	tryc	subflye	sample12	AOR	flye	sub	tryc_subflye_sample12_contig967	contig967	NA	NA	NA	root (UID1)	5656	56	24	56	0	0	0	0	0	0	0	0	4160	38	4997560	22476377	38	5
AOR_Tryc_subflye_sample12	tryc	subflye	sample12	AOR	flye	sub	tryc_subflye_sample12_contig990	contig990	NA	NA	NA	root (UID1)	5656	56	24	56	0	0	0	0	0	0	0	0	130029	38	4997560	22476377	38	5
AOR_unic_MS	unic	MS	none	AOR	unic	MS	unic_MS_none_1404	1404	NA	NA	NA	root (UID1)	5656	56	24	56	0	0	0	0	0	0	0	0	9565	22	59308	133341	22	0
AOR_unic_MS	unic	MS	none	AOR	unic	MS	unic_MS_none_1551	1551	NA	NA	NA	root (UID1)	5656	56	24	56	0	0	0	0	0	0	0	0	8649	22	59308	133341	22	0
AOR_unic_MS	unic	MS	none	AOR	unic	MS	unic_MS_none_1753	1753	NA	NA	NA	root (UID1)	5656	56	24	56	0	0	0	0	0	0	0	0	7459	22	59308	133341	22	0
AOR_unic_MS	unic	MS	none	AOR	unic	MS	unic_MS_none_244	244	NA	NA	NA	root (UID1)	5656	56	24	56	0	0	0	0	0	0	0	0	59308	22	59308	133341	22	0
AOR_unic_MS	unic	MS	none	AOR	unic	MS	unic_MS_none_2473	2473	NA	NA	NA	root (UID1)	5656	56	24	56	0	0	0	0	0	0	0	0	5270	22	59308	133341	22	0
AOR_unic_MS	unic	MS	none	AOR	unic	MS	unic_MS_none_2506	2506	NA	NA	NA	root (UID1)	5656	56	24	56	0	0	0	0	0	0	0	0	5183	22	59308	133341	22	0
AOR_unic_MS	unic	MS	none	AOR	unic	MS	unic_MS_none_2726	2726	NA	NA	NA	root (UID1)	5656	56	24	56	0	0	0	0	0	0	0	0	4649	22	59308	133341	22	0
AOR_unic_MS	unic	MS	none	AOR	unic	MS	unic_MS_none_2990	2990	NA	NA	NA	root (UID1)	5656	56	24	56	0	0	0	0	0	0	0	0	4148	22	59308	133341	22	0
AOR_unic_MS	unic	MS	none	AOR	unic	MS	unic_MS_none_3165	3165	NA	NA	NA	root (UID1)	5656	56	24	56	0	0	0	0	0	0	0	0	3847	22	59308	133341	22	0
AOR_unic_MS	unic	MS	none	AOR	unic	MS	unic_MS_none_3323	3323	NA	NA	NA	root (UID1)	5656	56	24	56	0	0	0	0	0	0	0	0	3556	22	59308	133341	22	0
AOR_unic_MS	unic	MS	none	AOR	unic	MS	unic_MS_none_3470	3470	NA	NA	NA	root (UID1)	5656	56	24	56	0	0	0	0	0	0	0	0	3303	22	59308	133341	22	0
AOR_unic_MS	unic	MS	none	AOR	unic	MS	unic_MS_none_3951	3951	NA	NA	NA	root (UID1)	5656	56	24	56	0	0	0	0	0	0	0	0	2710	22	59308	133341	22	0
AOR_unic_MS	unic	MS	none	AOR	unic	MS	unic_MS_none_4495	4495	NA	NA	NA	root (UID1)	5656	56	24	56	0	0	0	0	0	0	0	0	2131	22	59308	133341	22	0
AOR_unic_MS	unic	MS	none	AOR	unic	MS	unic_MS_none_4544	4544	NA	NA	NA	root (UID1)	5656	56	24	56	0	0	0	0	0	0	0	0	2076	22	59308	133341	22	0
AOR_unic_MS	unic	MS	none	AOR	unic	MS	unic_MS_none_4746	4746	NA	NA	NA	root (UID1)	5656	56	24	56	0	0	0	0	0	0	0	0	1899	22	59308	133341	22	0
AOR_unic_MS	unic	MS	none	AOR	unic	MS	unic_MS_none_4993	4993	NA	NA	NA	root (UID1)	5656	56	24	56	0	0	0	0	0	0	0	0	1706	22	59308	133341	22	0
AOR_unic_MS	unic	MS	none	AOR	unic	MS	unic_MS_none_5181	5181	NA	NA	NA	root (UID1)	5656	56	24	56	0	0	0	0	0	0	0	0	1563	22	59308	133341	22	0
AOR_unic_MS	unic	MS	none	AOR	unic	MS	unic_MS_none_5256	5256	NA	NA	NA	root (UID1)	5656	56	24	56	0	0	0	0	0	0	0	0	1503	22	59308	133341	22	0
AOR_unic_MS	unic	MS	none	AOR	unic	MS	unic_MS_none_5382	5382	NA	NA	NA	root (UID1)	5656	56	24	56	0	0	0	0	0	0	0	0	1416	22	59308	133341	22	0
AOR_unic_MS	unic	MS	none	AOR	unic	MS	unic_MS_none_5512	5512	NA	NA	NA	root (UID1)	5656	56	24	56	0	0	0	0	0	0	0	0	1321	22	59308	133341	22	0
AOR_unic_MS	unic	MS	none	AOR	unic	MS	unic_MS_none_5899	5899	NA	NA	NA	root (UID1)	5656	56	24	56	0	0	0	0	0	0	0	0	1059	22	59308	133341	22	0
AOR_unic_MS	unic	MS	none	AOR	unic	MS	unic_MS_none_5935	5935	NA	NA	NA	root (UID1)	5656	56	24	56	0	0	0	0	0	0	0	0	1020	22	59308	133341	22	0
AOR_unic_NP	unic	NP	none	AOR	unic	NP	unic_NP_none_1	1	d__Bacteria;p__Planctomycetota	d__Bacteria	p__Planctomycetota	k__Bacteria (UID2565)	2921	143	88	44	99	0	0	0	0	63.46	0	0	4996046	15	4996046	14137914	15	3
AOR_unic_NP	unic	NP	none	AOR	unic	NP	unic_NP_none_2	2	d__Bacteria;p__Chloroflexota	d__Bacteria	p__Chloroflexota	k__Bacteria (UID1452)	924	163	110	46	114	3	0	0	0	65.96	1.92	0	4655378	15	4996046	14137914	15	3
AOR_unic_NP	unic	NP	none	AOR	unic	NP	unic_NP_none_4	4	d__Bacteria;p__Proteobacteria	d__Bacteria	p__Proteobacteria	o__Rhizobiales (UID3447)	356	408	244	80	328	0	0	0	0	78.89	0	0	4244077	15	4996046	14137914	15	3
AOR_unic_NP	unic	NP	none	AOR	unic	NP	unic_NP_none_839	839	NA	NA	NA	root (UID1)	5656	56	24	56	0	0	0	0	0	0	0	0	19533	15	4996046	14137914	15	3
AOR_unic_NP	unic	NP	none	AOR	unic	NP	unic_NP_none_849	849	NA	NA	NA	root (UID1)	5656	56	24	56	0	0	0	0	0	0	0	0	22373	15	4996046	14137914	15	3
AOR_unic_NP	unic	NP	none	AOR	unic	NP	unic_NP_none_928	928	NA	NA	NA	root (UID1)	5656	56	24	56	0	0	0	0	0	0	0	0	18017	15	4996046	14137914	15	3
AOR_unic_NP	unic	NP	none	AOR	unic	NP	unic_NP_none_94	94	NA	NA	NA	root (UID1)	5656	56	24	56	0	0	0	0	0	0	0	0	130106	15	4996046	14137914	15	3
AOR_unic_NP	unic	NP	none	AOR	unic	NP	unic_NP_none_975	975	NA	NA	NA	root (UID1)	5656	56	24	56	0	0	0	0	0	0	0	0	11290	15	4996046	14137914	15	3
AOR_unic_NP	unic	NP	none	AOR	unic	NP	unic_NP_none_976	976	NA	NA	NA	root (UID1)	5656	56	24	56	0	0	0	0	0	0	0	0	9124	15	4996046	14137914	15	3
AOR_unic_NP	unic	NP	none	AOR	unic	NP	unic_NP_none_977	977	NA	NA	NA	root (UID1)	5656	56	24	56	0	0	0	0	0	0	0	0	10900	15	4996046	14137914	15	3
AOR_unic_NP	unic	NP	none	AOR	unic	NP	unic_NP_none_978	978	NA	NA	NA	root (UID1)	5656	56	24	56	0	0	0	0	0	0	0	0	7230	15	4996046	14137914	15	3
AOR_unic_NP	unic	NP	none	AOR	unic	NP	unic_NP_none_979	979	NA	NA	NA	root (UID1)	5656	56	24	56	0	0	0	0	0	0	0	0	6089	15	4996046	14137914	15	3
AOR_unic_NP	unic	NP	none	AOR	unic	NP	unic_NP_none_980	980	NA	NA	NA	root (UID1)	5656	56	24	56	0	0	0	0	0	0	0	0	3578	15	4996046	14137914	15	3
AOR_unic_NP	unic	NP	none	AOR	unic	NP	unic_NP_none_981	981	NA	NA	NA	root (UID1)	5656	56	24	56	0	0	0	0	0	0	0	0	2616	15	4996046	14137914	15	3
AOR_unic_NP	unic	NP	none	AOR	unic	NP	unic_NP_none_982	982	NA	NA	NA	root (UID1)	5656	56	24	56	0	0	0	0	0	0	0	0	1557	15	4996046	14137914	15	3
AOR_unic_NPMS	unic	NPMS	none	AOR	unic	NPMS	unic_NPMS_none_1011	1011	NA	NA	NA	root (UID1)	5656	56	24	56	0	0	0	0	0	0	0	0	3718	49	4381530	5161964	49	1
AOR_unic_NPMS	unic	NPMS	none	AOR	unic	NPMS	unic_NPMS_none_1030	1030	NA	NA	NA	root (UID1)	5656	56	24	56	0	0	0	0	0	0	0	0	3556	49	4381530	5161964	49	1
AOR_unic_NPMS	unic	NPMS	none	AOR	unic	NPMS	unic_NPMS_none_1049	1049	NA	NA	NA	root (UID1)	5656	56	24	56	0	0	0	0	0	0	0	0	3357	49	4381530	5161964	49	1
AOR_unic_NPMS	unic	NPMS	none	AOR	unic	NPMS	unic_NPMS_none_1058	1058	NA	NA	NA	root (UID1)	5656	56	24	56	0	0	0	0	0	0	0	0	3292	49	4381530	5161964	49	1
AOR_unic_NPMS	unic	NPMS	none	AOR	unic	NPMS	unic_NPMS_none_1231	1231	NA	NA	NA	root (UID1)	5656	56	24	56	0	0	0	0	0	0	0	0	2358	49	4381530	5161964	49	1
AOR_unic_NPMS	unic	NPMS	none	AOR	unic	NPMS	unic_NPMS_none_1291	1291	NA	NA	NA	root (UID1)	5656	56	24	56	0	0	0	0	0	0	0	0	2076	49	4381530	5161964	49	1
AOR_unic_NPMS	unic	NPMS	none	AOR	unic	NPMS	unic_NPMS_none_1323	1323	NA	NA	NA	root (UID1)	5656	56	24	56	0	0	0	0	0	0	0	0	1899	49	4381530	5161964	49	1
AOR_unic_NPMS	unic	NPMS	none	AOR	unic	NPMS	unic_NPMS_none_1330	1330	NA	NA	NA	root (UID1)	5656	56	24	56	0	0	0	0	0	0	0	0	1892	49	4381530	5161964	49	1
AOR_unic_NPMS	unic	NPMS	none	AOR	unic	NPMS	unic_NPMS_none_1344	1344	NA	NA	NA	root (UID1)	5656	56	24	56	0	0	0	0	0	0	0	0	1839	49	4381530	5161964	49	1
AOR_unic_NPMS	unic	NPMS	none	AOR	unic	NPMS	unic_NPMS_none_1388	1388	NA	NA	NA	root (UID1)	5656	56	24	56	0	0	0	0	0	0	0	0	1689	49	4381530	5161964	49	1
AOR_unic_NPMS	unic	NPMS	none	AOR	unic	NPMS	unic_NPMS_none_1412	1412	NA	NA	NA	root (UID1)	5656	56	24	56	0	0	0	0	0	0	0	0	1631	49	4381530	5161964	49	1
AOR_unic_NPMS	unic	NPMS	none	AOR	unic	NPMS	unic_NPMS_none_1434	1434	NA	NA	NA	root (UID1)	5656	56	24	56	0	0	0	0	0	0	0	0	1581	49	4381530	5161964	49	1
AOR_unic_NPMS	unic	NPMS	none	AOR	unic	NPMS	unic_NPMS_none_1444	1444	NA	NA	NA	root (UID1)	5656	56	24	56	0	0	0	0	0	0	0	0	1563	49	4381530	5161964	49	1
AOR_unic_NPMS	unic	NPMS	none	AOR	unic	NPMS	unic_NPMS_none_1466	1466	NA	NA	NA	root (UID1)	5656	56	24	56	0	0	0	0	0	0	0	0	1503	49	4381530	5161964	49	1
AOR_unic_NPMS	unic	NPMS	none	AOR	unic	NPMS	unic_NPMS_none_1470	1470	NA	NA	NA	root (UID1)	5656	56	24	56	0	0	0	0	0	0	0	0	1493	49	4381530	5161964	49	1
AOR_unic_NPMS	unic	NPMS	none	AOR	unic	NPMS	unic_NPMS_none_149	149	NA	NA	NA	root (UID1)	5656	56	24	56	0	0	0	0	0	0	0	0	103490	49	4381530	5161964	49	1
AOR_unic_NPMS	unic	NPMS	none	AOR	unic	NPMS	unic_NPMS_none_1503	1503	NA	NA	NA	root (UID1)	5656	56	24	56	0	0	0	0	0	0	0	0	1416	49	4381530	5161964	49	1
AOR_unic_NPMS	unic	NPMS	none	AOR	unic	NPMS	unic_NPMS_none_1663	1663	NA	NA	NA	root (UID1)	5656	56	24	56	0	0	0	0	0	0	0	0	1059	49	4381530	5161964	49	1
AOR_unic_NPMS	unic	NPMS	none	AOR	unic	NPMS	unic_NPMS_none_1678	1678	NA	NA	NA	root (UID1)	5656	56	24	56	0	0	0	0	0	0	0	0	1020	49	4381530	5161964	49	1
AOR_unic_NPMS	unic	NPMS	none	AOR	unic	NPMS	unic_NPMS_none_195	195	NA	NA	NA	root (UID1)	5656	56	24	56	0	0	0	0	0	0	0	0	78208	49	4381530	5161964	49	1
AOR_unic_NPMS	unic	NPMS	none	AOR	unic	NPMS	unic_NPMS_none_2	2	d__Bacteria;p__Nitrospirota	d__Bacteria	p__Nitrospirota	k__Bacteria (UID3187)	2258	181	110	5	170	6	0	0	0	96.82	4.77	0	4381530	49	4381530	5161964	49	1
AOR_unic_NPMS	unic	NPMS	none	AOR	unic	NPMS	unic_NPMS_none_243	243	NA	NA	NA	root (UID1)	5656	56	24	56	0	0	0	0	0	0	0	0	59308	49	4381530	5161964	49	1
AOR_unic_NPMS	unic	NPMS	none	AOR	unic	NPMS	unic_NPMS_none_425	425	NA	NA	NA	root (UID1)	5656	56	24	56	0	0	0	0	0	0	0	0	23203	49	4381530	5161964	49	1
AOR_unic_NPMS	unic	NPMS	none	AOR	unic	NPMS	unic_NPMS_none_460	460	NA	NA	NA	root (UID1)	5656	56	24	56	0	0	0	0	0	0	0	0	20630	49	4381530	5161964	49	1
AOR_unic_NPMS	unic	NPMS	none	AOR	unic	NPMS	unic_NPMS_none_471	471	NA	NA	NA	root (UID1)	5656	56	24	56	0	0	0	0	0	0	0	0	19909	49	4381530	5161964	49	1
AOR_unic_NPMS	unic	NPMS	none	AOR	unic	NPMS	unic_NPMS_none_515	515	NA	NA	NA	root (UID1)	5656	56	24	56	0	0	0	0	0	0	0	0	17100	49	4381530	5161964	49	1
AOR_unic_NPMS	unic	NPMS	none	AOR	unic	NPMS	unic_NPMS_none_526	526	NA	NA	NA	k__Bacteria (UID3187)	2258	181	110	162	18	1	0	0	0	1.77	0.05	0	16228	49	4381530	5161964	49	1
AOR_unic_NPMS	unic	NPMS	none	AOR	unic	NPMS	unic_NPMS_none_542	542	NA	NA	NA	root (UID1)	5656	56	24	56	0	0	0	0	0	0	0	0	15160	49	4381530	5161964	49	1
AOR_unic_NPMS	unic	NPMS	none	AOR	unic	NPMS	unic_NPMS_none_56	56	NA	NA	NA	root (UID1)	5656	56	24	56	0	0	0	0	0	0	0	0	223613	49	4381530	5161964	49	1
AOR_unic_NPMS	unic	NPMS	none	AOR	unic	NPMS	unic_NPMS_none_574	574	NA	NA	NA	root (UID1)	5656	56	24	56	0	0	0	0	0	0	0	0	13934	49	4381530	5161964	49	1
AOR_unic_NPMS	unic	NPMS	none	AOR	unic	NPMS	unic_NPMS_none_583	583	NA	NA	NA	root (UID1)	5656	56	24	56	0	0	0	0	0	0	0	0	13064	49	4381530	5161964	49	1
AOR_unic_NPMS	unic	NPMS	none	AOR	unic	NPMS	unic_NPMS_none_597	597	NA	NA	NA	root (UID1)	5656	56	24	56	0	0	0	0	0	0	0	0	12777	49	4381530	5161964	49	1
AOR_unic_NPMS	unic	NPMS	none	AOR	unic	NPMS	unic_NPMS_none_614	614	NA	NA	NA	root (UID1)	5656	56	24	56	0	0	0	0	0	0	0	0	11941	49	4381530	5161964	49	1
AOR_unic_NPMS	unic	NPMS	none	AOR	unic	NPMS	unic_NPMS_none_636	636	NA	NA	NA	root (UID1)	5656	56	24	56	0	0	0	0	0	0	0	0	11286	49	4381530	5161964	49	1
AOR_unic_NPMS	unic	NPMS	none	AOR	unic	NPMS	unic_NPMS_none_651	651	NA	NA	NA	root (UID1)	5656	56	24	56	0	0	0	0	0	0	0	0	10685	49	4381530	5161964	49	1
AOR_unic_NPMS	unic	NPMS	none	AOR	unic	NPMS	unic_NPMS_none_676	676	NA	NA	NA	root (UID1)	5656	56	24	56	0	0	0	0	0	0	0	0	9736	49	4381530	5161964	49	1
AOR_unic_NPMS	unic	NPMS	none	AOR	unic	NPMS	unic_NPMS_none_681	681	NA	NA	NA	root (UID1)	5656	56	24	56	0	0	0	0	0	0	0	0	9565	49	4381530	5161964	49	1
AOR_unic_NPMS	unic	NPMS	none	AOR	unic	NPMS	unic_NPMS_none_695	695	NA	NA	NA	root (UID1)	5656	56	24	56	0	0	0	0	0	0	0	0	9173	49	4381530	5161964	49	1
AOR_unic_NPMS	unic	NPMS	none	AOR	unic	NPMS	unic_NPMS_none_714	714	NA	NA	NA	root (UID1)	5656	56	24	56	0	0	0	0	0	0	0	0	8649	49	4381530	5161964	49	1
AOR_unic_NPMS	unic	NPMS	none	AOR	unic	NPMS	unic_NPMS_none_747	747	NA	NA	NA	root (UID1)	5656	56	24	56	0	0	0	0	0	0	0	0	7705	49	4381530	5161964	49	1
AOR_unic_NPMS	unic	NPMS	none	AOR	unic	NPMS	unic_NPMS_none_758	758	NA	NA	NA	root (UID1)	5656	56	24	56	0	0	0	0	0	0	0	0	7283	49	4381530	5161964	49	1
AOR_unic_NPMS	unic	NPMS	none	AOR	unic	NPMS	unic_NPMS_none_790	790	NA	NA	NA	root (UID1)	5656	56	24	56	0	0	0	0	0	0	0	0	6756	49	4381530	5161964	49	1
AOR_unic_NPMS	unic	NPMS	none	AOR	unic	NPMS	unic_NPMS_none_846	846	NA	NA	NA	root (UID1)	5656	56	24	56	0	0	0	0	0	0	0	0	5710	49	4381530	5161964	49	1
AOR_unic_NPMS	unic	NPMS	none	AOR	unic	NPMS	unic_NPMS_none_868	868	NA	NA	NA	root (UID1)	5656	56	24	56	0	0	0	0	0	0	0	0	5270	49	4381530	5161964	49	1
AOR_unic_NPMS	unic	NPMS	none	AOR	unic	NPMS	unic_NPMS_none_876	876	NA	NA	NA	root (UID1)	5656	56	24	56	0	0	0	0	0	0	0	0	5183	49	4381530	5161964	49	1
AOR_unic_NPMS	unic	NPMS	none	AOR	unic	NPMS	unic_NPMS_none_900	900	NA	NA	NA	root (UID1)	5656	56	24	56	0	0	0	0	0	0	0	0	4884	49	4381530	5161964	49	1
AOR_unic_NPMS	unic	NPMS	none	AOR	unic	NPMS	unic_NPMS_none_916	916	NA	NA	NA	root (UID1)	5656	56	24	56	0	0	0	0	0	0	0	0	4649	49	4381530	5161964	49	1
AOR_unic_NPMS	unic	NPMS	none	AOR	unic	NPMS	unic_NPMS_none_945	945	NA	NA	NA	root (UID1)	5656	56	24	56	0	0	0	0	0	0	0	0	4245	49	4381530	5161964	49	1
AOR_unic_NPMS	unic	NPMS	none	AOR	unic	NPMS	unic_NPMS_none_957	957	NA	NA	NA	root (UID1)	5656	56	24	56	0	0	0	0	0	0	0	0	4148	49	4381530	5161964	49	1
NOR_canu	canu	meta	none	NOR	canu	meta	canu_meta_none_tig00000001	tig00000001	d__Bacteria;p__Bacteroidota	d__Bacteria	p__Bacteroidota	o__Cytophagales (UID2936)	47	454	336	141	308	5	0	0	0	65.97	0.95	0	4125195	17	4512532	9635547	17	2
NOR_canu	canu	meta	none	NOR	canu	meta	canu_meta_none_tig00000002	tig00000002	d__Bacteria;p__Bacteroidota	d__Bacteria	p__Bacteroidota	o__Cytophagales (UID2936)	47	454	336	154	292	8	0	0	0	61.96	1.66	0	4512532	17	4512532	9635547	17	2
NOR_canu	canu	meta	none	NOR	canu	meta	canu_meta_none_tig00000761	tig00000761	NA	NA	NA	root (UID1)	5656	56	24	56	0	0	0	0	0	0	0	0	194624	17	4512532	9635547	17	2
NOR_canu	canu	meta	none	NOR	canu	meta	canu_meta_none_tig00000846	tig00000846	NA	NA	NA	root (UID1)	5656	56	24	56	0	0	0	0	0	0	0	0	138497	17	4512532	9635547	17	2
NOR_canu	canu	meta	none	NOR	canu	meta	canu_meta_none_tig00000946	tig00000946	NA	NA	NA	root (UID1)	5656	56	24	56	0	0	0	0	0	0	0	0	120511	17	4512532	9635547	17	2
NOR_canu	canu	meta	none	NOR	canu	meta	canu_meta_none_tig00001042	tig00001042	NA	NA	NA	root (UID1)	5656	56	24	56	0	0	0	0	0	0	0	0	75731	17	4512532	9635547	17	2
NOR_canu	canu	meta	none	NOR	canu	meta	canu_meta_none_tig00001043	tig00001043	NA	NA	NA	root (UID1)	5656	56	24	56	0	0	0	0	0	0	0	0	91936	17	4512532	9635547	17	2
NOR_canu	canu	meta	none	NOR	canu	meta	canu_meta_none_tig00001175	tig00001175	NA	NA	NA	root (UID1)	5656	56	24	56	0	0	0	0	0	0	0	0	60275	17	4512532	9635547	17	2
NOR_canu	canu	meta	none	NOR	canu	meta	canu_meta_none_tig00001184	tig00001184	NA	NA	NA	root (UID1)	5656	56	24	56	0	0	0	0	0	0	0	0	99320	17	4512532	9635547	17	2
NOR_canu	canu	meta	none	NOR	canu	meta	canu_meta_none_tig00001330	tig00001330	NA	NA	NA	root (UID1)	5656	56	24	56	0	0	0	0	0	0	0	0	43592	17	4512532	9635547	17	2
NOR_canu	canu	meta	none	NOR	canu	meta	canu_meta_none_tig00002155	tig00002155	NA	NA	NA	root (UID1)	5656	56	24	56	0	0	0	0	0	0	0	0	27976	17	4512532	9635547	17	2
NOR_canu	canu	meta	none	NOR	canu	meta	canu_meta_none_tig00002453	tig00002453	NA	NA	NA	root (UID1)	5656	56	24	56	0	0	0	0	0	0	0	0	6240	17	4512532	9635547	17	2
NOR_canu	canu	meta	none	NOR	canu	meta	canu_meta_none_tig00003240	tig00003240	NA	NA	NA	root (UID1)	5656	56	24	56	0	0	0	0	0	0	0	0	13476	17	4512532	9635547	17	2
NOR_canu	canu	meta	none	NOR	canu	meta	canu_meta_none_tig00003253	tig00003253	NA	NA	NA	root (UID1)	5656	56	24	56	0	0	0	0	0	0	0	0	13219	17	4512532	9635547	17	2
NOR_canu	canu	meta	none	NOR	canu	meta	canu_meta_none_tig00028601	tig00028601	NA	NA	NA	root (UID1)	5656	56	24	56	0	0	0	0	0	0	0	0	43866	17	4512532	9635547	17	2
NOR_canu	canu	meta	none	NOR	canu	meta	canu_meta_none_tig00103271	tig00103271	NA	NA	NA	root (UID1)	5656	56	24	56	0	0	0	0	0	0	0	0	61631	17	4512532	9635547	17	2
NOR_canu	canu	meta	none	NOR	canu	meta	canu_meta_none_tig00103423	tig00103423	NA	NA	NA	root (UID1)	5656	56	24	56	0	0	0	0	0	0	0	0	6926	17	4512532	9635547	17	2
NOR_canu_def	canu	def	none	NOR	canu	def	canu_def_none_tig00000633	tig00000633	NA	NA	NA	root (UID1)	5656	56	24	56	0	0	0	0	0	0	0	0	43649	2	43649	57404	2	0
NOR_canu_def	canu	def	none	NOR	canu	def	canu_def_none_tig00001953	tig00001953	NA	NA	NA	root (UID1)	5656	56	24	56	0	0	0	0	0	0	0	0	13755	2	43649	57404	2	0
NOR_flye	flye	meta	none	NOR	flye	meta	flye_meta_none_contig1058	contig1058	NA	NA	NA	root (UID1)	5656	56	24	56	0	0	0	0	0	0	0	0	29552	82	5207240	33120602	82	8
NOR_flye	flye	meta	none	NOR	flye	meta	flye_meta_none_contig1063	contig1063	NA	NA	NA	root (UID1)	5656	56	24	56	0	0	0	0	0	0	0	0	1300	82	5207240	33120602	82	8
NOR_flye	flye	meta	none	NOR	flye	meta	flye_meta_none_contig1065	contig1065	NA	NA	NA	root (UID1)	5656	56	24	56	0	0	0	0	0	0	0	0	8811	82	5207240	33120602	82	8
NOR_flye	flye	meta	none	NOR	flye	meta	flye_meta_none_contig1095	contig1095	NA	NA	NA	root (UID1)	5656	56	24	56	0	0	0	0	0	0	0	0	5082	82	5207240	33120602	82	8
NOR_flye	flye	meta	none	NOR	flye	meta	flye_meta_none_contig114	contig114	NA	NA	NA	root (UID1)	5656	56	24	56	0	0	0	0	0	0	0	0	120051	82	5207240	33120602	82	8
NOR_flye	flye	meta	none	NOR	flye	meta	flye_meta_none_contig115	contig115	NA	NA	NA	root (UID1)	5656	56	24	56	0	0	0	0	0	0	0	0	139844	82	5207240	33120602	82	8
NOR_flye	flye	meta	none	NOR	flye	meta	flye_meta_none_contig116	contig116	NA	NA	NA	root (UID1)	5656	56	24	56	0	0	0	0	0	0	0	0	184157	82	5207240	33120602	82	8
NOR_flye	flye	meta	none	NOR	flye	meta	flye_meta_none_contig1176	contig1176	NA	NA	NA	root (UID1)	5656	56	24	56	0	0	0	0	0	0	0	0	42100	82	5207240	33120602	82	8
NOR_flye	flye	meta	none	NOR	flye	meta	flye_meta_none_contig12	contig12	d__Bacteria;p__Actinobacteriota	d__Bacteria	p__Actinobacteriota	g__Mycobacterium (UID1816)	100	693	300	102	589	2	0	0	0	84.83	0.67	0	5207240	82	5207240	33120602	82	8
NOR_flye	flye	meta	none	NOR	flye	meta	flye_meta_none_contig1258	contig1258	NA	NA	NA	root (UID1)	5656	56	24	56	0	0	0	0	0	0	0	0	3637	82	5207240	33120602	82	8
NOR_flye	flye	meta	none	NOR	flye	meta	flye_meta_none_contig1334	contig1334	NA	NA	NA	root (UID1)	5656	56	24	56	0	0	0	0	0	0	0	0	32198	82	5207240	33120602	82	8
NOR_flye	flye	meta	none	NOR	flye	meta	flye_meta_none_contig1339	contig1339	NA	NA	NA	root (UID1)	5656	56	24	56	0	0	0	0	0	0	0	0	9915	82	5207240	33120602	82	8
NOR_flye	flye	meta	none	NOR	flye	meta	flye_meta_none_contig134	contig134	NA	NA	NA	root (UID1)	5656	56	24	56	0	0	0	0	0	0	0	0	196721	82	5207240	33120602	82	8
NOR_flye	flye	meta	none	NOR	flye	meta	flye_meta_none_contig1402	contig1402	NA	NA	NA	root (UID1)	5656	56	24	56	0	0	0	0	0	0	0	0	2541	82	5207240	33120602	82	8
NOR_flye	flye	meta	none	NOR	flye	meta	flye_meta_none_contig1426	contig1426	NA	NA	NA	root (UID1)	5656	56	24	56	0	0	0	0	0	0	0	0	7823	82	5207240	33120602	82	8
NOR_flye	flye	meta	none	NOR	flye	meta	flye_meta_none_contig1459	contig1459	NA	NA	NA	root (UID1)	5656	56	24	56	0	0	0	0	0	0	0	0	34520	82	5207240	33120602	82	8
NOR_flye	flye	meta	none	NOR	flye	meta	flye_meta_none_contig1507	contig1507	NA	NA	NA	root (UID1)	5656	56	24	56	0	0	0	0	0	0	0	0	12964	82	5207240	33120602	82	8
NOR_flye	flye	meta	none	NOR	flye	meta	flye_meta_none_contig16	contig16	d__Bacteria;p__Proteobacteria	d__Bacteria	p__Proteobacteria	c__Gammaproteobacteria (UID4201)	1164	275	174	46	229	0	0	0	0	79.4	0	0	2642101	82	5207240	33120602	82	8
NOR_flye	flye	meta	none	NOR	flye	meta	flye_meta_none_contig1668	contig1668	NA	NA	NA	root (UID1)	5656	56	24	56	0	0	0	0	0	0	0	0	3682	82	5207240	33120602	82	8
NOR_flye	flye	meta	none	NOR	flye	meta	flye_meta_none_contig1748	contig1748	NA	NA	NA	root (UID1)	5656	56	24	56	0	0	0	0	0	0	0	0	2398	82	5207240	33120602	82	8
NOR_flye	flye	meta	none	NOR	flye	meta	flye_meta_none_contig1756	contig1756	NA	NA	NA	root (UID1)	5656	56	24	56	0	0	0	0	0	0	0	0	1995	82	5207240	33120602	82	8
NOR_flye	flye	meta	none	NOR	flye	meta	flye_meta_none_contig1774	contig1774	NA	NA	NA	root (UID1)	5656	56	24	56	0	0	0	0	0	0	0	0	42403	82	5207240	33120602	82	8
NOR_flye	flye	meta	none	NOR	flye	meta	flye_meta_none_contig180	contig180	NA	NA	NA	root (UID1)	5656	56	24	56	0	0	0	0	0	0	0	0	5012	82	5207240	33120602	82	8
NOR_flye	flye	meta	none	NOR	flye	meta	flye_meta_none_contig1866	contig1866	NA	NA	NA	root (UID1)	5656	56	24	56	0	0	0	0	0	0	0	0	3683	82	5207240	33120602	82	8
NOR_flye	flye	meta	none	NOR	flye	meta	flye_meta_none_contig1955	contig1955	NA	NA	NA	root (UID1)	5656	56	24	56	0	0	0	0	0	0	0	0	4586	82	5207240	33120602	82	8
NOR_flye	flye	meta	none	NOR	flye	meta	flye_meta_none_contig2035	contig2035	NA	NA	NA	root (UID1)	5656	56	24	56	0	0	0	0	0	0	0	0	6629	82	5207240	33120602	82	8
NOR_flye	flye	meta	none	NOR	flye	meta	flye_meta_none_contig224	contig224	d__Bacteria;p__Bacteroidota	d__Bacteria	p__Bacteroidota	o__Cytophagales (UID2936)	47	454	336	69	380	4	1	0	0	83.58	1.25	0	4115501	82	5207240	33120602	82	8
NOR_flye	flye	meta	none	NOR	flye	meta	flye_meta_none_contig2275	contig2275	NA	NA	NA	root (UID1)	5656	56	24	56	0	0	0	0	0	0	0	0	8593	82	5207240	33120602	82	8
NOR_flye	flye	meta	none	NOR	flye	meta	flye_meta_none_contig2300	contig2300	NA	NA	NA	root (UID1)	5656	56	24	56	0	0	0	0	0	0	0	0	11904	82	5207240	33120602	82	8
NOR_flye	flye	meta	none	NOR	flye	meta	flye_meta_none_contig234	contig234	NA	NA	NA	root (UID1)	5656	56	24	56	0	0	0	0	0	0	0	0	4346	82	5207240	33120602	82	8
NOR_flye	flye	meta	none	NOR	flye	meta	flye_meta_none_contig2405	contig2405	NA	NA	NA	root (UID1)	5656	56	24	56	0	0	0	0	0	0	0	0	4298	82	5207240	33120602	82	8
NOR_flye	flye	meta	none	NOR	flye	meta	flye_meta_none_contig2408	contig2408	NA	NA	NA	root (UID1)	5656	56	24	56	0	0	0	0	0	0	0	0	11099	82	5207240	33120602	82	8
NOR_flye	flye	meta	none	NOR	flye	meta	flye_meta_none_contig2438	contig2438	NA	NA	NA	root (UID1)	5656	56	24	56	0	0	0	0	0	0	0	0	64787	82	5207240	33120602	82	8
NOR_flye	flye	meta	none	NOR	flye	meta	flye_meta_none_contig2513	contig2513	NA	NA	NA	root (UID1)	5656	56	24	56	0	0	0	0	0	0	0	0	5170	82	5207240	33120602	82	8
NOR_flye	flye	meta	none	NOR	flye	meta	flye_meta_none_contig2529	contig2529	NA	NA	NA	root (UID1)	5656	56	24	56	0	0	0	0	0	0	0	0	31249	82	5207240	33120602	82	8
NOR_flye	flye	meta	none	NOR	flye	meta	flye_meta_none_contig2631	contig2631	NA	NA	NA	root (UID1)	5656	56	24	56	0	0	0	0	0	0	0	0	5785	82	5207240	33120602	82	8
NOR_flye	flye	meta	none	NOR	flye	meta	flye_meta_none_contig2660	contig2660	NA	NA	NA	root (UID1)	5656	56	24	56	0	0	0	0	0	0	0	0	6838	82	5207240	33120602	82	8
NOR_flye	flye	meta	none	NOR	flye	meta	flye_meta_none_contig2701	contig2701	NA	NA	NA	root (UID1)	5656	56	24	56	0	0	0	0	0	0	0	0	8174	82	5207240	33120602	82	8
NOR_flye	flye	meta	none	NOR	flye	meta	flye_meta_none_contig2707	contig2707	NA	NA	NA	root (UID1)	5656	56	24	56	0	0	0	0	0	0	0	0	87804	82	5207240	33120602	82	8
NOR_flye	flye	meta	none	NOR	flye	meta	flye_meta_none_contig2730	contig2730	NA	NA	NA	root (UID1)	5656	56	24	56	0	0	0	0	0	0	0	0	2975	82	5207240	33120602	82	8
NOR_flye	flye	meta	none	NOR	flye	meta	flye_meta_none_contig2731	contig2731	NA	NA	NA	root (UID1)	5656	56	24	56	0	0	0	0	0	0	0	0	20644	82	5207240	33120602	82	8
NOR_flye	flye	meta	none	NOR	flye	meta	flye_meta_none_contig2741	contig2741	NA	NA	NA	root (UID1)	5656	56	24	56	0	0	0	0	0	0	0	0	7806	82	5207240	33120602	82	8
NOR_flye	flye	meta	none	NOR	flye	meta	flye_meta_none_contig2752	contig2752	NA	NA	NA	root (UID1)	5656	56	24	56	0	0	0	0	0	0	0	0	21015	82	5207240	33120602	82	8
NOR_flye	flye	meta	none	NOR	flye	meta	flye_meta_none_contig2755	contig2755	NA	NA	NA	root (UID1)	5656	56	24	56	0	0	0	0	0	0	0	0	39536	82	5207240	33120602	82	8
NOR_flye	flye	meta	none	NOR	flye	meta	flye_meta_none_contig2765	contig2765	NA	NA	NA	root (UID1)	5656	56	24	56	0	0	0	0	0	0	0	0	1953	82	5207240	33120602	82	8
NOR_flye	flye	meta	none	NOR	flye	meta	flye_meta_none_contig2767	contig2767	NA	NA	NA	root (UID1)	5656	56	24	56	0	0	0	0	0	0	0	0	15610	82	5207240	33120602	82	8
NOR_flye	flye	meta	none	NOR	flye	meta	flye_meta_none_contig2776	contig2776	NA	NA	NA	root (UID1)	5656	56	24	56	0	0	0	0	0	0	0	0	17562	82	5207240	33120602	82	8
NOR_flye	flye	meta	none	NOR	flye	meta	flye_meta_none_contig2781	contig2781	NA	NA	NA	root (UID1)	5656	56	24	56	0	0	0	0	0	0	0	0	20235	82	5207240	33120602	82	8
NOR_flye	flye	meta	none	NOR	flye	meta	flye_meta_none_contig2800	contig2800	NA	NA	NA	root (UID1)	5656	56	24	56	0	0	0	0	0	0	0	0	6246	82	5207240	33120602	82	8
NOR_flye	flye	meta	none	NOR	flye	meta	flye_meta_none_contig2806	contig2806	NA	NA	NA	k__Bacteria (UID203)	5449	103	57	100	3	0	0	0	0	0.9	0	0	41453	82	5207240	33120602	82	8
NOR_flye	flye	meta	none	NOR	flye	meta	flye_meta_none_contig2808	contig2808	NA	NA	NA	root (UID1)	5656	56	24	56	0	0	0	0	0	0	0	0	36266	82	5207240	33120602	82	8
NOR_flye	flye	meta	none	NOR	flye	meta	flye_meta_none_contig2810	contig2810	NA	NA	NA	root (UID1)	5656	56	24	56	0	0	0	0	0	0	0	0	17636	82	5207240	33120602	82	8
NOR_flye	flye	meta	none	NOR	flye	meta	flye_meta_none_contig2815	contig2815	NA	NA	NA	root (UID1)	5656	56	24	56	0	0	0	0	0	0	0	0	10550	82	5207240	33120602	82	8
NOR_flye	flye	meta	none	NOR	flye	meta	flye_meta_none_contig2816	contig2816	NA	NA	NA	root (UID1)	5656	56	24	56	0	0	0	0	0	0	0	0	182792	82	5207240	33120602	82	8
NOR_flye	flye	meta	none	NOR	flye	meta	flye_meta_none_contig2817	contig2817	NA	NA	NA	root (UID1)	5656	56	24	56	0	0	0	0	0	0	0	0	25438	82	5207240	33120602	82	8
NOR_flye	flye	meta	none	NOR	flye	meta	flye_meta_none_contig2818	contig2818	NA	NA	NA	root (UID1)	5656	56	24	56	0	0	0	0	0	0	0	0	9929	82	5207240	33120602	82	8
NOR_flye	flye	meta	none	NOR	flye	meta	flye_meta_none_contig2823	contig2823	NA	NA	NA	root (UID1)	5656	56	24	56	0	0	0	0	0	0	0	0	78106	82	5207240	33120602	82	8
NOR_flye	flye	meta	none	NOR	flye	meta	flye_meta_none_contig2826	contig2826	NA	NA	NA	root (UID1)	5656	56	24	56	0	0	0	0	0	0	0	0	2992	82	5207240	33120602	82	8
NOR_flye	flye	meta	none	NOR	flye	meta	flye_meta_none_contig2827	contig2827	NA	NA	NA	root (UID1)	5656	56	24	56	0	0	0	0	0	0	0	0	5550	82	5207240	33120602	82	8
NOR_flye	flye	meta	none	NOR	flye	meta	flye_meta_none_contig2830	contig2830	NA	NA	NA	root (UID1)	5656	56	24	56	0	0	0	0	0	0	0	0	17358	82	5207240	33120602	82	8
NOR_flye	flye	meta	none	NOR	flye	meta	flye_meta_none_contig3	contig3	NA	NA	NA	root (UID1)	5656	56	24	56	0	0	0	0	0	0	0	0	43108	82	5207240	33120602	82	8
NOR_flye	flye	meta	none	NOR	flye	meta	flye_meta_none_contig332	contig332	NA	NA	NA	root (UID1)	5656	56	24	56	0	0	0	0	0	0	0	0	115231	82	5207240	33120602	82	8
NOR_flye	flye	meta	none	NOR	flye	meta	flye_meta_none_contig389	contig389	NA	NA	NA	root (UID1)	5656	56	24	56	0	0	0	0	0	0	0	0	9173	82	5207240	33120602	82	8
NOR_flye	flye	meta	none	NOR	flye	meta	flye_meta_none_contig4	contig4	d__Bacteria;p__Proteobacteria	d__Bacteria	p__Proteobacteria	c__Gammaproteobacteria (UID4202)	67	481	276	131	347	3	0	0	0	68.19	0.4	0	2616543	82	5207240	33120602	82	8
NOR_flye	flye	meta	none	NOR	flye	meta	flye_meta_none_contig413	contig413	NA	NA	NA	root (UID1)	5656	56	24	56	0	0	0	0	0	0	0	0	21036	82	5207240	33120602	82	8
NOR_flye	flye	meta	none	NOR	flye	meta	flye_meta_none_contig52	contig52	NA	NA	NA	root (UID1)	5656	56	24	56	0	0	0	0	0	0	0	0	2954	82	5207240	33120602	82	8
NOR_flye	flye	meta	none	NOR	flye	meta	flye_meta_none_contig563	contig563	d__Bacteria;p__Proteobacteria	d__Bacteria	p__Proteobacteria	f__Rhodobacteraceae (UID3340)	84	568	330	145	421	2	0	0	0	73.15	0.33	0	3787257	82	5207240	33120602	82	8
NOR_flye	flye	meta	none	NOR	flye	meta	flye_meta_none_contig6	contig6	NA	NA	NA	root (UID1)	5656	56	24	56	0	0	0	0	0	0	0	0	3715	82	5207240	33120602	82	8
NOR_flye	flye	meta	none	NOR	flye	meta	NA	contig600	NA	NA	NA	NA	NA	NA	NA	NA	NA	NA	NA	NA	NA	NA	NA	NA	5461	82	5207240	33120602	82	8
NOR_flye	flye	meta	none	NOR	flye	meta	flye_meta_none_contig616	contig616	NA	NA	NA	root (UID1)	5656	56	24	56	0	0	0	0	0	0	0	0	6474	82	5207240	33120602	82	8
NOR_flye	flye	meta	none	NOR	flye	meta	flye_meta_none_contig648	contig648	d__Bacteria;p__Bacteroidota	d__Bacteria	p__Bacteroidota	p__Bacteroidetes (UID2591)	364	303	203	84	215	4	0	0	0	67.85	1	0	3960454	82	5207240	33120602	82	8
NOR_flye	flye	meta	none	NOR	flye	meta	flye_meta_none_contig680	contig680	NA	NA	NA	root (UID1)	5656	56	24	56	0	0	0	0	0	0	0	0	7400	82	5207240	33120602	82	8
NOR_flye	flye	meta	none	NOR	flye	meta	flye_meta_none_contig702	contig702	NA	NA	NA	root (UID1)	5656	56	24	56	0	0	0	0	0	0	0	0	19289	82	5207240	33120602	82	8
NOR_flye	flye	meta	none	NOR	flye	meta	flye_meta_none_contig748	contig748	NA	NA	NA	root (UID1)	5656	56	24	56	0	0	0	0	0	0	0	0	6454	82	5207240	33120602	82	8
NOR_flye	flye	meta	none	NOR	flye	meta	flye_meta_none_contig8	contig8	NA	NA	NA	root (UID1)	5656	56	24	56	0	0	0	0	0	0	0	0	5903	82	5207240	33120602	82	8
NOR_flye	flye	meta	none	NOR	flye	meta	flye_meta_none_contig829	contig829	NA	NA	NA	root (UID1)	5656	56	24	56	0	0	0	0	0	0	0	0	120219	82	5207240	33120602	82	8
NOR_flye	flye	meta	none	NOR	flye	meta	flye_meta_none_contig86	contig86	d__Bacteria;p__Bacteroidota	d__Bacteria	p__Bacteroidota	o__Cytophagales (UID2936)	47	454	336	97	353	4	0	0	0	76.11	0.75	0	4520996	82	5207240	33120602	82	8
NOR_flye	flye	meta	none	NOR	flye	meta	flye_meta_none_contig893	contig893	NA	NA	NA	root (UID1)	5656	56	24	56	0	0	0	0	0	0	0	0	4991	82	5207240	33120602	82	8
NOR_flye	flye	meta	none	NOR	flye	meta	flye_meta_none_contig942	contig942	NA	NA	NA	root (UID1)	5656	56	24	56	0	0	0	0	0	0	0	0	58004	82	5207240	33120602	82	8
NOR_flye	flye	meta	none	NOR	flye	meta	flye_meta_none_contig956	contig956	NA	NA	NA	root (UID1)	5656	56	24	56	0	0	0	0	0	0	0	0	560	82	5207240	33120602	82	8
NOR_flye	flye	meta	none	NOR	flye	meta	flye_meta_none_contig959	contig959	NA	NA	NA	root (UID1)	5656	56	24	56	0	0	0	0	0	0	0	0	788	82	5207240	33120602	82	8
NOR_flye	flye	meta	none	NOR	flye	meta	flye_meta_none_contig96	contig96	d__Bacteria;p__Nitrospirota	d__Bacteria	p__Nitrospirota	k__Bacteria (UID3187)	2258	181	110	41	138	2	0	0	0	72.14	1.82	0	4106447	82	5207240	33120602	82	8
NOR_flye_def	flye	def	none	NOR	flye	def	flye_def_none_contig1131	contig1131	NA	NA	NA	root (UID1)	5656	56	24	56	0	0	0	0	0	0	0	0	7396	42	3775756	7403177	42	2
NOR_flye_def	flye	def	none	NOR	flye	def	flye_def_none_contig127	contig127	d__Bacteria;p__Proteobacteria	d__Bacteria	p__Proteobacteria	c__Gammaproteobacteria (UID4202)	67	481	276	128	350	3	0	0	0	68.15	0.06	0	2616527	42	3775756	7403177	42	2
NOR_flye_def	flye	def	none	NOR	flye	def	flye_def_none_contig1279	contig1279	NA	NA	NA	root (UID1)	5656	56	24	56	0	0	0	0	0	0	0	0	20243	42	3775756	7403177	42	2
NOR_flye_def	flye	def	none	NOR	flye	def	flye_def_none_contig1298	contig1298	NA	NA	NA	root (UID1)	5656	56	24	56	0	0	0	0	0	0	0	0	6954	42	3775756	7403177	42	2
NOR_flye_def	flye	def	none	NOR	flye	def	flye_def_none_contig1419	contig1419	NA	NA	NA	root (UID1)	5656	56	24	56	0	0	0	0	0	0	0	0	7832	42	3775756	7403177	42	2
NOR_flye_def	flye	def	none	NOR	flye	def	flye_def_none_contig1487	contig1487	NA	NA	NA	root (UID1)	5656	56	24	56	0	0	0	0	0	0	0	0	31711	42	3775756	7403177	42	2
NOR_flye_def	flye	def	none	NOR	flye	def	flye_def_none_contig1514	contig1514	NA	NA	NA	root (UID1)	5656	56	24	56	0	0	0	0	0	0	0	0	36258	42	3775756	7403177	42	2
NOR_flye_def	flye	def	none	NOR	flye	def	flye_def_none_contig1864	contig1864	NA	NA	NA	root (UID1)	5656	56	24	56	0	0	0	0	0	0	0	0	8823	42	3775756	7403177	42	2
NOR_flye_def	flye	def	none	NOR	flye	def	flye_def_none_contig1995	contig1995	NA	NA	NA	root (UID1)	5656	56	24	56	0	0	0	0	0	0	0	0	5905	42	3775756	7403177	42	2
NOR_flye_def	flye	def	none	NOR	flye	def	flye_def_none_contig2071	contig2071	NA	NA	NA	root (UID1)	5656	56	24	56	0	0	0	0	0	0	0	0	46765	42	3775756	7403177	42	2
NOR_flye_def	flye	def	none	NOR	flye	def	flye_def_none_contig2120	contig2120	NA	NA	NA	root (UID1)	5656	56	24	56	0	0	0	0	0	0	0	0	19556	42	3775756	7403177	42	2
NOR_flye_def	flye	def	none	NOR	flye	def	flye_def_none_contig2405	contig2405	NA	NA	NA	root (UID1)	5656	56	24	56	0	0	0	0	0	0	0	0	2996	42	3775756	7403177	42	2
NOR_flye_def	flye	def	none	NOR	flye	def	flye_def_none_contig2426	contig2426	NA	NA	NA	root (UID1)	5656	56	24	56	0	0	0	0	0	0	0	0	21006	42	3775756	7403177	42	2
NOR_flye_def	flye	def	none	NOR	flye	def	flye_def_none_contig2442	contig2442	NA	NA	NA	root (UID1)	5656	56	24	56	0	0	0	0	0	0	0	0	25477	42	3775756	7403177	42	2
NOR_flye_def	flye	def	none	NOR	flye	def	flye_def_none_contig2475	contig2475	NA	NA	NA	root (UID1)	5656	56	24	56	0	0	0	0	0	0	0	0	21947	42	3775756	7403177	42	2
NOR_flye_def	flye	def	none	NOR	flye	def	flye_def_none_contig2496	contig2496	NA	NA	NA	root (UID1)	5656	56	24	56	0	0	0	0	0	0	0	0	3998	42	3775756	7403177	42	2
NOR_flye_def	flye	def	none	NOR	flye	def	flye_def_none_contig2519	contig2519	NA	NA	NA	root (UID1)	5656	56	24	56	0	0	0	0	0	0	0	0	17311	42	3775756	7403177	42	2
NOR_flye_def	flye	def	none	NOR	flye	def	flye_def_none_contig2521	contig2521	NA	NA	NA	root (UID1)	5656	56	24	56	0	0	0	0	0	0	0	0	2068	42	3775756	7403177	42	2
NOR_flye_def	flye	def	none	NOR	flye	def	flye_def_none_contig2585	contig2585	NA	NA	NA	root (UID1)	5656	56	24	56	0	0	0	0	0	0	0	0	1370	42	3775756	7403177	42	2
NOR_flye_def	flye	def	none	NOR	flye	def	flye_def_none_contig2590	contig2590	NA	NA	NA	k__Bacteria (UID203)	5449	103	57	100	3	0	0	0	0	0.9	0	0	41442	42	3775756	7403177	42	2
NOR_flye_def	flye	def	none	NOR	flye	def	flye_def_none_contig2605	contig2605	NA	NA	NA	root (UID1)	5656	56	24	56	0	0	0	0	0	0	0	0	17579	42	3775756	7403177	42	2
NOR_flye_def	flye	def	none	NOR	flye	def	flye_def_none_contig2611	contig2611	NA	NA	NA	root (UID1)	5656	56	24	56	0	0	0	0	0	0	0	0	1964	42	3775756	7403177	42	2
NOR_flye_def	flye	def	none	NOR	flye	def	flye_def_none_contig2637	contig2637	NA	NA	NA	root (UID1)	5656	56	24	56	0	0	0	0	0	0	0	0	3949	42	3775756	7403177	42	2
NOR_flye_def	flye	def	none	NOR	flye	def	flye_def_none_contig2659	contig2659	NA	NA	NA	root (UID1)	5656	56	24	56	0	0	0	0	0	0	0	0	8183	42	3775756	7403177	42	2
NOR_flye_def	flye	def	none	NOR	flye	def	flye_def_none_contig2662	contig2662	NA	NA	NA	root (UID1)	5656	56	24	56	0	0	0	0	0	0	0	0	3716	42	3775756	7403177	42	2
NOR_flye_def	flye	def	none	NOR	flye	def	flye_def_none_contig2671	contig2671	NA	NA	NA	root (UID1)	5656	56	24	56	0	0	0	0	0	0	0	0	20599	42	3775756	7403177	42	2
NOR_flye_def	flye	def	none	NOR	flye	def	flye_def_none_contig2677	contig2677	NA	NA	NA	root (UID1)	5656	56	24	56	0	0	0	0	0	0	0	0	15611	42	3775756	7403177	42	2
NOR_flye_def	flye	def	none	NOR	flye	def	flye_def_none_contig2678	contig2678	NA	NA	NA	root (UID1)	5656	56	24	56	0	0	0	0	0	0	0	0	78098	42	3775756	7403177	42	2
NOR_flye_def	flye	def	none	NOR	flye	def	flye_def_none_contig2680	contig2680	NA	NA	NA	root (UID1)	5656	56	24	56	0	0	0	0	0	0	0	0	39534	42	3775756	7403177	42	2
NOR_flye_def	flye	def	none	NOR	flye	def	flye_def_none_contig390	contig390	NA	NA	NA	root (UID1)	5656	56	24	56	0	0	0	0	0	0	0	0	115206	42	3775756	7403177	42	2
NOR_flye_def	flye	def	none	NOR	flye	def	flye_def_none_contig46	contig46	d__Bacteria;p__Proteobacteria	d__Bacteria	p__Proteobacteria	f__Rhodobacteraceae (UID3340)	84	568	330	313	255	0	0	0	0	44.24	0	0	3775756	42	3775756	7403177	42	2
NOR_flye_def	flye	def	none	NOR	flye	def	flye_def_none_contig485	contig485	NA	NA	NA	root (UID1)	5656	56	24	56	0	0	0	0	0	0	0	0	87815	42	3775756	7403177	42	2
NOR_flye_def	flye	def	none	NOR	flye	def	flye_def_none_contig594	contig594	NA	NA	NA	root (UID1)	5656	56	24	56	0	0	0	0	0	0	0	0	5170	42	3775756	7403177	42	2
NOR_flye_def	flye	def	none	NOR	flye	def	flye_def_none_contig602	contig602	NA	NA	NA	root (UID1)	5656	56	24	56	0	0	0	0	0	0	0	0	5092	42	3775756	7403177	42	2
NOR_flye_def	flye	def	none	NOR	flye	def	flye_def_none_contig655	contig655	NA	NA	NA	root (UID1)	5656	56	24	56	0	0	0	0	0	0	0	0	6522	42	3775756	7403177	42	2
NOR_flye_def	flye	def	none	NOR	flye	def	flye_def_none_contig737	contig737	NA	NA	NA	root (UID1)	5656	56	24	56	0	0	0	0	0	0	0	0	6577	42	3775756	7403177	42	2
NOR_flye_def	flye	def	none	NOR	flye	def	flye_def_none_contig743	contig743	NA	NA	NA	root (UID1)	5656	56	24	56	0	0	0	0	0	0	0	0	6451	42	3775756	7403177	42	2
NOR_flye_def	flye	def	none	NOR	flye	def	flye_def_none_contig746	contig746	NA	NA	NA	root (UID1)	5656	56	24	56	0	0	0	0	0	0	0	0	184162	42	3775756	7403177	42	2
NOR_flye_def	flye	def	none	NOR	flye	def	flye_def_none_contig795	contig795	NA	NA	NA	root (UID1)	5656	56	24	56	0	0	0	0	0	0	0	0	21078	42	3775756	7403177	42	2
NOR_flye_def	flye	def	none	NOR	flye	def	flye_def_none_contig89	contig89	NA	NA	NA	root (UID1)	5656	56	24	56	0	0	0	0	0	0	0	0	15435	42	3775756	7403177	42	2
NOR_flye_def	flye	def	none	NOR	flye	def	flye_def_none_contig976	contig976	NA	NA	NA	root (UID1)	5656	56	24	56	0	0	0	0	0	0	0	0	31255	42	3775756	7403177	42	2
NOR_flye_def	flye	def	none	NOR	flye	def	flye_def_none_contig984	contig984	NA	NA	NA	root (UID1)	5656	56	24	56	0	0	0	0	0	0	0	0	7840	42	3775756	7403177	42	2
NOR_Tryc_subcanu_sample01	tryc	subcanu	sample01	NOR	canu	sub	tryc_subcanu_sample01_tig00000001	tig00000001	d__Bacteria;p__Bacteroidota	d__Bacteria	p__Bacteroidota	k__Bacteria (UID203)	5449	104	58	27	57	20	0	0	0	65.75	3.89	80	4512624	13	4512624	12100770	13	3
NOR_Tryc_subcanu_sample01	tryc	subcanu	sample01	NOR	canu	sub	tryc_subcanu_sample01_tig00000668	tig00000668	NA	NA	NA	root (UID1)	5656	56	24	56	0	0	0	0	0	0	0	0	194330	13	4512624	12100770	13	3
NOR_Tryc_subcanu_sample01	tryc	subcanu	sample01	NOR	canu	sub	tryc_subcanu_sample01_tig00000733	tig00000733	NA	NA	NA	root (UID1)	5656	56	24	56	0	0	0	0	0	0	0	0	136492	13	4512624	12100770	13	3
NOR_Tryc_subcanu_sample01	tryc	subcanu	sample01	NOR	canu	sub	tryc_subcanu_sample01_tig00000840	tig00000840	NA	NA	NA	root (UID1)	5656	56	24	56	0	0	0	0	0	0	0	0	88417	13	4512624	12100770	13	3
NOR_Tryc_subcanu_sample01	tryc	subcanu	sample01	NOR	canu	sub	tryc_subcanu_sample01_tig00000865	tig00000865	NA	NA	NA	root (UID1)	5656	56	24	56	0	0	0	0	0	0	0	0	75798	13	4512624	12100770	13	3
NOR_Tryc_subcanu_sample01	tryc	subcanu	sample01	NOR	canu	sub	tryc_subcanu_sample01_tig00000988	tig00000988	NA	NA	NA	root (UID1)	5656	56	24	56	0	0	0	0	0	0	0	0	59675	13	4512624	12100770	13	3
NOR_Tryc_subcanu_sample01	tryc	subcanu	sample01	NOR	canu	sub	tryc_subcanu_sample01_tig00001066	tig00001066	NA	NA	NA	root (UID1)	5656	56	24	56	0	0	0	0	0	0	0	0	48606	13	4512624	12100770	13	3
NOR_Tryc_subcanu_sample01	tryc	subcanu	sample01	NOR	canu	sub	tryc_subcanu_sample01_tig00001845	tig00001845	NA	NA	NA	root (UID1)	5656	56	24	56	0	0	0	0	0	0	0	0	27976	13	4512624	12100770	13	3
NOR_Tryc_subcanu_sample01	tryc	subcanu	sample01	NOR	canu	sub	tryc_subcanu_sample01_tig00024826	tig00024826	d__Bacteria;p__Proteobacteria	d__Bacteria	p__Proteobacteria	c__Gammaproteobacteria (UID4201)	1164	275	174	80	186	9	0	0	0	66.12	1.42	33.33	2726091	13	4512624	12100770	13	3
NOR_Tryc_subcanu_sample01	tryc	subcanu	sample01	NOR	canu	sub	tryc_subcanu_sample01_tig00087014	tig00087014	d__Bacteria;p__Bacteroidota	d__Bacteria	p__Bacteroidota	o__Cytophagales (UID2936)	47	454	336	146	301	7	0	0	0	65.44	1.11	0	4119124	13	4512624	12100770	13	3
NOR_Tryc_subcanu_sample01	tryc	subcanu	sample01	NOR	canu	sub	tryc_subcanu_sample01_tig00087034	tig00087034	NA	NA	NA	root (UID1)	5656	56	24	56	0	0	0	0	0	0	0	0	61572	13	4512624	12100770	13	3
NOR_Tryc_subcanu_sample01	tryc	subcanu	sample01	NOR	canu	sub	tryc_subcanu_sample01_tig00087061	tig00087061	NA	NA	NA	root (UID1)	5656	56	24	56	0	0	0	0	0	0	0	0	43835	13	4512624	12100770	13	3
NOR_Tryc_subcanu_sample01	tryc	subcanu	sample01	NOR	canu	sub	tryc_subcanu_sample01_tig00087070	tig00087070	NA	NA	NA	root (UID1)	5656	56	24	56	0	0	0	0	0	0	0	0	6230	13	4512624	12100770	13	3
NOR_Tryc_subcanu_sample02	tryc	subcanu	sample02	NOR	canu	sub	tryc_subcanu_sample02_tig00000004	tig00000004	d__Bacteria;p__Bacteroidota	d__Bacteria	p__Bacteroidota	o__Cytophagales (UID2936)	47	454	336	146	302	6	0	0	0	65.17	1.34	33.33	4114715	12	4114715	8048193	12	2
NOR_Tryc_subcanu_sample02	tryc	subcanu	sample02	NOR	canu	sub	tryc_subcanu_sample02_tig00000009	tig00000009	d__Bacteria;p__Proteobacteria	d__Bacteria	p__Proteobacteria	c__Gammaproteobacteria (UID4202)	67	481	276	181	290	10	0	0	0	60.31	1.47	10	3223011	12	4114715	8048193	12	2
NOR_Tryc_subcanu_sample02	tryc	subcanu	sample02	NOR	canu	sub	tryc_subcanu_sample02_tig00000684	tig00000684	NA	NA	NA	root (UID1)	5656	56	24	56	0	0	0	0	0	0	0	0	194371	12	4114715	8048193	12	2
NOR_Tryc_subcanu_sample02	tryc	subcanu	sample02	NOR	canu	sub	tryc_subcanu_sample02_tig00000720	tig00000720	NA	NA	NA	root (UID1)	5656	56	24	56	0	0	0	0	0	0	0	0	138465	12	4114715	8048193	12	2
NOR_Tryc_subcanu_sample02	tryc	subcanu	sample02	NOR	canu	sub	tryc_subcanu_sample02_tig00000872	tig00000872	NA	NA	NA	root (UID1)	5656	56	24	56	0	0	0	0	0	0	0	0	88417	12	4114715	8048193	12	2
NOR_Tryc_subcanu_sample02	tryc	subcanu	sample02	NOR	canu	sub	tryc_subcanu_sample02_tig00000909	tig00000909	NA	NA	NA	root (UID1)	5656	56	24	56	0	0	0	0	0	0	0	0	75785	12	4114715	8048193	12	2
NOR_Tryc_subcanu_sample02	tryc	subcanu	sample02	NOR	canu	sub	tryc_subcanu_sample02_tig00001052	tig00001052	NA	NA	NA	root (UID1)	5656	56	24	56	0	0	0	0	0	0	0	0	59665	12	4114715	8048193	12	2
NOR_Tryc_subcanu_sample02	tryc	subcanu	sample02	NOR	canu	sub	tryc_subcanu_sample02_tig00001113	tig00001113	NA	NA	NA	root (UID1)	5656	56	24	56	0	0	0	0	0	0	0	0	48581	12	4114715	8048193	12	2
NOR_Tryc_subcanu_sample02	tryc	subcanu	sample02	NOR	canu	sub	tryc_subcanu_sample02_tig00001919	tig00001919	NA	NA	NA	root (UID1)	5656	56	24	56	0	0	0	0	0	0	0	0	27976	12	4114715	8048193	12	2
NOR_Tryc_subcanu_sample02	tryc	subcanu	sample02	NOR	canu	sub	tryc_subcanu_sample02_tig00024825	tig00024825	NA	NA	NA	root (UID1)	5656	56	24	56	0	0	0	0	0	0	0	0	43781	12	4114715	8048193	12	2
NOR_Tryc_subcanu_sample02	tryc	subcanu	sample02	NOR	canu	sub	tryc_subcanu_sample02_tig00086496	tig00086496	NA	NA	NA	root (UID1)	5656	56	24	56	0	0	0	0	0	0	0	0	26509	12	4114715	8048193	12	2
NOR_Tryc_subcanu_sample02	tryc	subcanu	sample02	NOR	canu	sub	tryc_subcanu_sample02_tig00086555	tig00086555	NA	NA	NA	root (UID1)	5656	56	24	56	0	0	0	0	0	0	0	0	6917	12	4114715	8048193	12	2
NOR_Tryc_subcanu_sample03	tryc	subcanu	sample03	NOR	canu	sub	tryc_subcanu_sample03_tig00000001	tig00000001	d__Bacteria;p__Bacteroidota	d__Bacteria	p__Bacteroidota	o__Cytophagales (UID2936)	47	454	336	154	294	6	0	0	0	61	1.35	0	4518105	12	4518105	9177458	12	2
NOR_Tryc_subcanu_sample03	tryc	subcanu	sample03	NOR	canu	sub	tryc_subcanu_sample03_tig00000002	tig00000002	d__Bacteria;p__Nitrospirota	d__Bacteria	p__Nitrospirota	k__Bacteria (UID3187)	2258	181	110	109	71	1	0	0	0	36.2	0.91	0	4108939	12	4518105	9177458	12	2
NOR_Tryc_subcanu_sample03	tryc	subcanu	sample03	NOR	canu	sub	tryc_subcanu_sample03_tig00000732	tig00000732	NA	NA	NA	root (UID1)	5656	56	24	56	0	0	0	0	0	0	0	0	138450	12	4518105	9177458	12	2
NOR_Tryc_subcanu_sample03	tryc	subcanu	sample03	NOR	canu	sub	tryc_subcanu_sample03_tig00000937	tig00000937	NA	NA	NA	root (UID1)	5656	56	24	56	0	0	0	0	0	0	0	0	91831	12	4518105	9177458	12	2
NOR_Tryc_subcanu_sample03	tryc	subcanu	sample03	NOR	canu	sub	tryc_subcanu_sample03_tig00001017	tig00001017	NA	NA	NA	root (UID1)	5656	56	24	56	0	0	0	0	0	0	0	0	95512	12	4518105	9177458	12	2
NOR_Tryc_subcanu_sample03	tryc	subcanu	sample03	NOR	canu	sub	tryc_subcanu_sample03_tig00001164	tig00001164	NA	NA	NA	root (UID1)	5656	56	24	56	0	0	0	0	0	0	0	0	43593	12	4518105	9177458	12	2
NOR_Tryc_subcanu_sample03	tryc	subcanu	sample03	NOR	canu	sub	tryc_subcanu_sample03_tig00001713	tig00001713	NA	NA	NA	root (UID1)	5656	56	24	56	0	0	0	0	0	0	0	0	34831	12	4518105	9177458	12	2
NOR_Tryc_subcanu_sample03	tryc	subcanu	sample03	NOR	canu	sub	tryc_subcanu_sample03_tig00001939	tig00001939	NA	NA	NA	root (UID1)	5656	56	24	56	0	0	0	0	0	0	0	0	27976	12	4518105	9177458	12	2
NOR_Tryc_subcanu_sample03	tryc	subcanu	sample03	NOR	canu	sub	tryc_subcanu_sample03_tig00002943	tig00002943	NA	NA	NA	root (UID1)	5656	56	24	56	0	0	0	0	0	0	0	0	5790	12	4518105	9177458	12	2
NOR_Tryc_subcanu_sample03	tryc	subcanu	sample03	NOR	canu	sub	tryc_subcanu_sample03_tig00003126	tig00003126	NA	NA	NA	root (UID1)	5656	56	24	56	0	0	0	0	0	0	0	0	10643	12	4518105	9177458	12	2
NOR_Tryc_subcanu_sample03	tryc	subcanu	sample03	NOR	canu	sub	tryc_subcanu_sample03_tig00086921	tig00086921	NA	NA	NA	root (UID1)	5656	56	24	56	0	0	0	0	0	0	0	0	75348	12	4518105	9177458	12	2
NOR_Tryc_subcanu_sample03	tryc	subcanu	sample03	NOR	canu	sub	tryc_subcanu_sample03_tig00086953	tig00086953	NA	NA	NA	root (UID1)	5656	56	24	56	0	0	0	0	0	0	0	0	26440	12	4518105	9177458	12	2
NOR_Tryc_subcanu_sample04	tryc	subcanu	sample04	NOR	canu	sub	tryc_subcanu_sample04_tig00000001	tig00000001	d__Bacteria;p__Bacteroidota	d__Bacteria	p__Bacteroidota	o__Cytophagales (UID2936)	47	454	336	155	290	9	0	0	0	62.01	1.42	0	4512663	9	4512663	5100939	9	1
NOR_Tryc_subcanu_sample04	tryc	subcanu	sample04	NOR	canu	sub	tryc_subcanu_sample04_tig00000718	tig00000718	NA	NA	NA	root (UID1)	5656	56	24	56	0	0	0	0	0	0	0	0	138433	9	4512663	5100939	9	1
NOR_Tryc_subcanu_sample04	tryc	subcanu	sample04	NOR	canu	sub	tryc_subcanu_sample04_tig00000860	tig00000860	NA	NA	NA	root (UID1)	5656	56	24	56	0	0	0	0	0	0	0	0	75789	9	4512663	5100939	9	1
NOR_Tryc_subcanu_sample04	tryc	subcanu	sample04	NOR	canu	sub	tryc_subcanu_sample04_tig00000897	tig00000897	NA	NA	NA	root (UID1)	5656	56	24	56	0	0	0	0	0	0	0	0	86233	9	4512663	5100939	9	1
NOR_Tryc_subcanu_sample04	tryc	subcanu	sample04	NOR	canu	sub	tryc_subcanu_sample04_tig00001036	tig00001036	NA	NA	NA	root (UID1)	5656	56	24	56	0	0	0	0	0	0	0	0	60237	9	4512663	5100939	9	1
NOR_Tryc_subcanu_sample04	tryc	subcanu	sample04	NOR	canu	sub	tryc_subcanu_sample04_tig00001179	tig00001179	NA	NA	NA	root (UID1)	5656	56	24	56	0	0	0	0	0	0	0	0	43587	9	4512663	5100939	9	1
NOR_Tryc_subcanu_sample04	tryc	subcanu	sample04	NOR	canu	sub	tryc_subcanu_sample04_tig00002810	tig00002810	NA	NA	NA	root (UID1)	5656	56	24	56	0	0	0	0	0	0	0	0	13477	9	4512663	5100939	9	1
NOR_Tryc_subcanu_sample04	tryc	subcanu	sample04	NOR	canu	sub	tryc_subcanu_sample04_tig00024909	tig00024909	NA	NA	NA	root (UID1)	5656	56	24	56	0	0	0	0	0	0	0	0	144035	9	4512663	5100939	9	1
NOR_Tryc_subcanu_sample04	tryc	subcanu	sample04	NOR	canu	sub	tryc_subcanu_sample04_tig00086808	tig00086808	NA	NA	NA	root (UID1)	5656	56	24	56	0	0	0	0	0	0	0	0	26485	9	4512663	5100939	9	1
NOR_Tryc_subcanu_sample05	tryc	subcanu	sample05	NOR	canu	sub	tryc_subcanu_sample05_tig00000001	tig00000001	d__Bacteria;p__Bacteroidota	d__Bacteria	p__Bacteroidota	o__Cytophagales (UID2936)	47	454	336	156	292	6	0	0	0	61.81	1.2	0	4512502	8	4512502	4984012	8	1
NOR_Tryc_subcanu_sample05	tryc	subcanu	sample05	NOR	canu	sub	tryc_subcanu_sample05_tig00000932	tig00000932	NA	NA	NA	root (UID1)	5656	56	24	56	0	0	0	0	0	0	0	0	75794	8	4512502	4984012	8	1
NOR_Tryc_subcanu_sample05	tryc	subcanu	sample05	NOR	canu	sub	tryc_subcanu_sample05_tig00001021	tig00001021	NA	NA	NA	root (UID1)	5656	56	24	56	0	0	0	0	0	0	0	0	60259	8	4512502	4984012	8	1
NOR_Tryc_subcanu_sample05	tryc	subcanu	sample05	NOR	canu	sub	tryc_subcanu_sample05_tig00001030	tig00001030	NA	NA	NA	root (UID1)	5656	56	24	56	0	0	0	0	0	0	0	0	89282	8	4512502	4984012	8	1
NOR_Tryc_subcanu_sample05	tryc	subcanu	sample05	NOR	canu	sub	tryc_subcanu_sample05_tig00001266	tig00001266	NA	NA	NA	root (UID1)	5656	56	24	56	0	0	0	0	0	0	0	0	43611	8	4512502	4984012	8	1
NOR_Tryc_subcanu_sample05	tryc	subcanu	sample05	NOR	canu	sub	tryc_subcanu_sample05_tig00002183	tig00002183	NA	NA	NA	root (UID1)	5656	56	24	56	0	0	0	0	0	0	0	0	27819	8	4512502	4984012	8	1
NOR_Tryc_subcanu_sample05	tryc	subcanu	sample05	NOR	canu	sub	tryc_subcanu_sample05_tig00024847	tig00024847	NA	NA	NA	root (UID1)	5656	56	24	56	0	0	0	0	0	0	0	0	43883	8	4512502	4984012	8	1
NOR_Tryc_subcanu_sample05	tryc	subcanu	sample05	NOR	canu	sub	tryc_subcanu_sample05_tig00086208	tig00086208	NA	NA	NA	root (UID1)	5656	56	24	56	0	0	0	0	0	0	0	0	130862	8	4512502	4984012	8	1
NOR_Tryc_subcanu_sample06	tryc	subcanu	sample06	NOR	canu	sub	tryc_subcanu_sample06_tig00000001	tig00000001	d__Bacteria;p__Bacteroidota	d__Bacteria	p__Bacteroidota	o__Cytophagales (UID2936)	47	454	336	156	291	7	0	0	0	60.7	1.12	0	4511787	13	4511787	16029971	13	4
NOR_Tryc_subcanu_sample06	tryc	subcanu	sample06	NOR	canu	sub	tryc_subcanu_sample06_tig00000002	tig00000002	d__Bacteria;p__Bacteroidota	d__Bacteria	p__Bacteroidota	o__Cytophagales (UID2936)	47	454	336	149	301	4	0	0	0	65.04	0.69	0	4123555	13	4511787	16029971	13	4
NOR_Tryc_subcanu_sample06	tryc	subcanu	sample06	NOR	canu	sub	tryc_subcanu_sample06_tig00000009	tig00000009	d__Bacteria;p__Proteobacteria	d__Bacteria	p__Proteobacteria	c__Gammaproteobacteria (UID4202)	67	481	276	135	320	26	0	0	0	67.13	1.55	57.69	2735258	13	4511787	16029971	13	4
NOR_Tryc_subcanu_sample06	tryc	subcanu	sample06	NOR	canu	sub	tryc_subcanu_sample06_tig00000689	tig00000689	NA	NA	NA	root (UID1)	5656	56	24	56	0	0	0	0	0	0	0	0	138407	13	4511787	16029971	13	4
NOR_Tryc_subcanu_sample06	tryc	subcanu	sample06	NOR	canu	sub	tryc_subcanu_sample06_tig00000922	tig00000922	NA	NA	NA	root (UID1)	5656	56	24	56	0	0	0	0	0	0	0	0	75756	13	4511787	16029971	13	4
NOR_Tryc_subcanu_sample06	tryc	subcanu	sample06	NOR	canu	sub	tryc_subcanu_sample06_tig00001008	tig00001008	NA	NA	NA	root (UID1)	5656	56	24	56	0	0	0	0	0	0	0	0	91767	13	4511787	16029971	13	4
NOR_Tryc_subcanu_sample06	tryc	subcanu	sample06	NOR	canu	sub	tryc_subcanu_sample06_tig00001073	tig00001073	NA	NA	NA	root (UID1)	5656	56	24	56	0	0	0	0	0	0	0	0	60272	13	4511787	16029971	13	4
NOR_Tryc_subcanu_sample06	tryc	subcanu	sample06	NOR	canu	sub	tryc_subcanu_sample06_tig00001274	tig00001274	NA	NA	NA	root (UID1)	5656	56	24	56	0	0	0	0	0	0	0	0	43621	13	4511787	16029971	13	4
NOR_Tryc_subcanu_sample06	tryc	subcanu	sample06	NOR	canu	sub	tryc_subcanu_sample06_tig00001879	tig00001879	NA	NA	NA	root (UID1)	5656	56	24	56	0	0	0	0	0	0	0	0	27977	13	4511787	16029971	13	4
NOR_Tryc_subcanu_sample06	tryc	subcanu	sample06	NOR	canu	sub	tryc_subcanu_sample06_tig00002221	tig00002221	NA	NA	NA	root (UID1)	5656	56	24	56	0	0	0	0	0	0	0	0	27795	13	4511787	16029971	13	4
NOR_Tryc_subcanu_sample06	tryc	subcanu	sample06	NOR	canu	sub	tryc_subcanu_sample06_tig00002248	tig00002248	NA	NA	NA	root (UID1)	5656	56	24	56	0	0	0	0	0	0	0	0	42772	13	4511787	16029971	13	4
NOR_Tryc_subcanu_sample06	tryc	subcanu	sample06	NOR	canu	sub	tryc_subcanu_sample06_tig00024919	tig00024919	NA	NA	NA	root (UID1)	5656	56	24	56	0	0	0	0	0	0	0	0	43898	13	4511787	16029971	13	4
NOR_Tryc_subcanu_sample06	tryc	subcanu	sample06	NOR	canu	sub	tryc_subcanu_sample06_tig00086799	tig00086799	d__Bacteria;p__Nitrospirota	d__Bacteria	p__Nitrospirota	k__Bacteria (UID3187)	2258	181	110	67	112	2	0	0	0	56.72	1.09	0	4107106	13	4511787	16029971	13	4
NOR_Tryc_subcanu_sample07	tryc	subcanu	sample07	NOR	canu	sub	tryc_subcanu_sample07_tig00000001	tig00000001	d__Bacteria;p__Bacteroidota	d__Bacteria	p__Bacteroidota	o__Cytophagales (UID2936)	47	454	336	152	295	7	0	0	0	64.08	1.35	0	4120234	11	4516015	17535515	11	4
NOR_Tryc_subcanu_sample07	tryc	subcanu	sample07	NOR	canu	sub	tryc_subcanu_sample07_tig00000005	tig00000005	d__Bacteria;p__Nitrospirota	d__Bacteria	p__Nitrospirota	k__Bacteria (UID3187)	2258	181	110	61	119	1	0	0	0	58.49	0.91	0	4109218	11	4516015	17535515	11	4
NOR_Tryc_subcanu_sample07	tryc	subcanu	sample07	NOR	canu	sub	tryc_subcanu_sample07_tig00000006	tig00000006	d__Bacteria;p__Proteobacteria	d__Bacteria	p__Proteobacteria	c__Betaproteobacteria (UID3959)	235	420	211	222	197	1	0	0	0	43.39	0.24	0	4252474	11	4516015	17535515	11	4
NOR_Tryc_subcanu_sample07	tryc	subcanu	sample07	NOR	canu	sub	tryc_subcanu_sample07_tig00000638	tig00000638	NA	NA	NA	root (UID1)	5656	56	24	56	0	0	0	0	0	0	0	0	194368	11	4516015	17535515	11	4
NOR_Tryc_subcanu_sample07	tryc	subcanu	sample07	NOR	canu	sub	tryc_subcanu_sample07_tig00000875	tig00000875	NA	NA	NA	root (UID1)	5656	56	24	56	0	0	0	0	0	0	0	0	91853	11	4516015	17535515	11	4
NOR_Tryc_subcanu_sample07	tryc	subcanu	sample07	NOR	canu	sub	tryc_subcanu_sample07_tig00000896	tig00000896	NA	NA	NA	root (UID1)	5656	56	24	56	0	0	0	0	0	0	0	0	75724	11	4516015	17535515	11	4
NOR_Tryc_subcanu_sample07	tryc	subcanu	sample07	NOR	canu	sub	tryc_subcanu_sample07_tig00001078	tig00001078	NA	NA	NA	root (UID1)	5656	56	24	56	0	0	0	0	0	0	0	0	60190	11	4516015	17535515	11	4
NOR_Tryc_subcanu_sample07	tryc	subcanu	sample07	NOR	canu	sub	tryc_subcanu_sample07_tig00001296	tig00001296	NA	NA	NA	root (UID1)	5656	56	24	56	0	0	0	0	0	0	0	0	43609	11	4516015	17535515	11	4
NOR_Tryc_subcanu_sample07	tryc	subcanu	sample07	NOR	canu	sub	tryc_subcanu_sample07_tig00001884	tig00001884	NA	NA	NA	root (UID1)	5656	56	24	56	0	0	0	0	0	0	0	0	27956	11	4516015	17535515	11	4
NOR_Tryc_subcanu_sample07	tryc	subcanu	sample07	NOR	canu	sub	tryc_subcanu_sample07_tig00025024	tig00025024	NA	NA	NA	root (UID1)	5656	56	24	56	0	0	0	0	0	0	0	0	43874	11	4516015	17535515	11	4
NOR_Tryc_subcanu_sample07	tryc	subcanu	sample07	NOR	canu	sub	tryc_subcanu_sample07_tig00087286	tig00087286	d__Bacteria;p__Bacteroidota	d__Bacteria	p__Bacteroidota	o__Cytophagales (UID2936)	47	454	336	163	281	10	0	0	0	59.76	2.35	10	4516015	11	4516015	17535515	11	4
NOR_Tryc_subcanu_sample08	tryc	subcanu	sample08	NOR	canu	sub	tryc_subcanu_sample08_tig00000044	tig00000044	d__Bacteria;p__Proteobacteria	d__Bacteria	p__Proteobacteria	c__Gammaproteobacteria (UID4201)	1164	275	174	100	175	0	0	0	0	57.65	0	0	2641550	11	2641550	3555160	11	1
NOR_Tryc_subcanu_sample08	tryc	subcanu	sample08	NOR	canu	sub	tryc_subcanu_sample08_tig00000673	tig00000673	NA	NA	NA	root (UID1)	5656	56	24	56	0	0	0	0	0	0	0	0	194394	11	2641550	3555160	11	1
NOR_Tryc_subcanu_sample08	tryc	subcanu	sample08	NOR	canu	sub	tryc_subcanu_sample08_tig00000747	tig00000747	NA	NA	NA	root (UID1)	5656	56	24	56	0	0	0	0	0	0	0	0	138440	11	2641550	3555160	11	1
NOR_Tryc_subcanu_sample08	tryc	subcanu	sample08	NOR	canu	sub	tryc_subcanu_sample08_tig00000845	tig00000845	NA	NA	NA	root (UID1)	5656	56	24	56	0	0	0	0	0	0	0	0	142936	11	2641550	3555160	11	1
NOR_Tryc_subcanu_sample08	tryc	subcanu	sample08	NOR	canu	sub	tryc_subcanu_sample08_tig00000878	tig00000878	NA	NA	NA	root (UID1)	5656	56	24	56	0	0	0	0	0	0	0	0	119012	11	2641550	3555160	11	1
NOR_Tryc_subcanu_sample08	tryc	subcanu	sample08	NOR	canu	sub	tryc_subcanu_sample08_tig00000895	tig00000895	NA	NA	NA	root (UID1)	5656	56	24	56	0	0	0	0	0	0	0	0	91884	11	2641550	3555160	11	1
NOR_Tryc_subcanu_sample08	tryc	subcanu	sample08	NOR	canu	sub	tryc_subcanu_sample08_tig00000918	tig00000918	NA	NA	NA	root (UID1)	5656	56	24	56	0	0	0	0	0	0	0	0	72987	11	2641550	3555160	11	1
NOR_Tryc_subcanu_sample08	tryc	subcanu	sample08	NOR	canu	sub	tryc_subcanu_sample08_tig00001029	tig00001029	NA	NA	NA	root (UID1)	5656	56	24	56	0	0	0	0	0	0	0	0	60205	11	2641550	3555160	11	1
NOR_Tryc_subcanu_sample08	tryc	subcanu	sample08	NOR	canu	sub	tryc_subcanu_sample08_tig00001402	tig00001402	NA	NA	NA	root (UID1)	5656	56	24	56	0	0	0	0	0	0	0	0	43600	11	2641550	3555160	11	1
NOR_Tryc_subcanu_sample08	tryc	subcanu	sample08	NOR	canu	sub	tryc_subcanu_sample08_tig00001696	tig00001696	NA	NA	NA	root (UID1)	5656	56	24	56	0	0	0	0	0	0	0	0	6266	11	2641550	3555160	11	1
NOR_Tryc_subcanu_sample08	tryc	subcanu	sample08	NOR	canu	sub	tryc_subcanu_sample08_tig00025076	tig00025076	NA	NA	NA	root (UID1)	5656	56	24	56	0	0	0	0	0	0	0	0	43886	11	2641550	3555160	11	1
NOR_Tryc_subcanu_sample09	tryc	subcanu	sample09	NOR	canu	sub	tryc_subcanu_sample09_tig00000003	tig00000003	d__Bacteria;p__Nitrospirota	d__Bacteria	p__Nitrospirota	k__Bacteria (UID3187)	2258	181	110	92	88	1	0	0	0	41.6	0.91	0	4108844	12	4108844	5051230	12	1
NOR_Tryc_subcanu_sample09	tryc	subcanu	sample09	NOR	canu	sub	tryc_subcanu_sample09_tig00000637	tig00000637	NA	NA	NA	root (UID1)	5656	56	24	56	0	0	0	0	0	0	0	0	190610	12	4108844	5051230	12	1
NOR_Tryc_subcanu_sample09	tryc	subcanu	sample09	NOR	canu	sub	tryc_subcanu_sample09_tig00000698	tig00000698	NA	NA	NA	root (UID1)	5656	56	24	56	0	0	0	0	0	0	0	0	138455	12	4108844	5051230	12	1
NOR_Tryc_subcanu_sample09	tryc	subcanu	sample09	NOR	canu	sub	tryc_subcanu_sample09_tig00000802	tig00000802	NA	NA	NA	root (UID1)	5656	56	24	56	0	0	0	0	0	0	0	0	119072	12	4108844	5051230	12	1
NOR_Tryc_subcanu_sample09	tryc	subcanu	sample09	NOR	canu	sub	tryc_subcanu_sample09_tig00000859	tig00000859	NA	NA	NA	root (UID1)	5656	56	24	56	0	0	0	0	0	0	0	0	91854	12	4108844	5051230	12	1
NOR_Tryc_subcanu_sample09	tryc	subcanu	sample09	NOR	canu	sub	tryc_subcanu_sample09_tig00000913	tig00000913	NA	NA	NA	root (UID1)	5656	56	24	56	0	0	0	0	0	0	0	0	77808	12	4108844	5051230	12	1
NOR_Tryc_subcanu_sample09	tryc	subcanu	sample09	NOR	canu	sub	tryc_subcanu_sample09_tig00001001	tig00001001	NA	NA	NA	root (UID1)	5656	56	24	56	0	0	0	0	0	0	0	0	60199	12	4108844	5051230	12	1
NOR_Tryc_subcanu_sample09	tryc	subcanu	sample09	NOR	canu	sub	tryc_subcanu_sample09_tig00001159	tig00001159	NA	NA	NA	root (UID1)	5656	56	24	56	0	0	0	0	0	0	0	0	48588	12	4108844	5051230	12	1
NOR_Tryc_subcanu_sample09	tryc	subcanu	sample09	NOR	canu	sub	tryc_subcanu_sample09_tig00001230	tig00001230	NA	NA	NA	root (UID1)	5656	56	24	56	0	0	0	0	0	0	0	0	43600	12	4108844	5051230	12	1
NOR_Tryc_subcanu_sample09	tryc	subcanu	sample09	NOR	canu	sub	tryc_subcanu_sample09_tig00002171	tig00002171	NA	NA	NA	root (UID1)	5656	56	24	56	0	0	0	0	0	0	0	0	28126	12	4108844	5051230	12	1
NOR_Tryc_subcanu_sample09	tryc	subcanu	sample09	NOR	canu	sub	tryc_subcanu_sample09_tig00002785	tig00002785	NA	NA	NA	root (UID1)	5656	56	24	56	0	0	0	0	0	0	0	0	12498	12	4108844	5051230	12	1
NOR_Tryc_subcanu_sample09	tryc	subcanu	sample09	NOR	canu	sub	tryc_subcanu_sample09_tig00086010	tig00086010	NA	NA	NA	root (UID1)	5656	56	24	56	0	0	0	0	0	0	0	0	131576	12	4108844	5051230	12	1
NOR_Tryc_subcanu_sample10	tryc	subcanu	sample10	NOR	canu	sub	tryc_subcanu_sample10_tig00000001	tig00000001	d__Bacteria;p__Bacteroidota	d__Bacteria	p__Bacteroidota	o__Cytophagales (UID2936)	47	454	336	145	300	9	0	0	0	63.37	1.61	0	4512373	16	4512373	16518813	16	4
NOR_Tryc_subcanu_sample10	tryc	subcanu	sample10	NOR	canu	sub	tryc_subcanu_sample10_tig00000002	tig00000002	d__Bacteria;p__Bacteroidota	d__Bacteria	p__Bacteroidota	o__Cytophagales (UID2936)	47	454	336	150	299	5	0	0	0	64.33	0.95	0	4124901	16	4512373	16518813	16	4
NOR_Tryc_subcanu_sample10	tryc	subcanu	sample10	NOR	canu	sub	tryc_subcanu_sample10_tig00000003	tig00000003	d__Bacteria;p__Nitrospirota	d__Bacteria	p__Nitrospirota	k__Bacteria (UID3187)	2258	181	110	64	114	3	0	0	0	56.52	1.41	0	4109110	16	4512373	16518813	16	4
NOR_Tryc_subcanu_sample10	tryc	subcanu	sample10	NOR	canu	sub	tryc_subcanu_sample10_tig00000262	tig00000262	NA	NA	NA	k__Bacteria (UID203)	5449	104	58	93	9	2	0	0	0	4.39	1.15	100	35279	16	4512373	16518813	16	4
NOR_Tryc_subcanu_sample10	tryc	subcanu	sample10	NOR	canu	sub	tryc_subcanu_sample10_tig00000605	tig00000605	NA	NA	NA	root (UID1)	5656	56	24	56	0	0	0	0	0	0	0	0	199006	16	4512373	16518813	16	4
NOR_Tryc_subcanu_sample10	tryc	subcanu	sample10	NOR	canu	sub	tryc_subcanu_sample10_tig00000637	tig00000637	NA	NA	NA	root (UID1)	5656	56	24	56	0	0	0	0	0	0	0	0	190520	16	4512373	16518813	16	4
NOR_Tryc_subcanu_sample10	tryc	subcanu	sample10	NOR	canu	sub	tryc_subcanu_sample10_tig00000698	tig00000698	NA	NA	NA	root (UID1)	5656	56	24	56	0	0	0	0	0	0	0	0	137829	16	4512373	16518813	16	4
NOR_Tryc_subcanu_sample10	tryc	subcanu	sample10	NOR	canu	sub	tryc_subcanu_sample10_tig00000828	tig00000828	NA	NA	NA	root (UID1)	5656	56	24	56	0	0	0	0	0	0	0	0	120263	16	4512373	16518813	16	4
NOR_Tryc_subcanu_sample10	tryc	subcanu	sample10	NOR	canu	sub	tryc_subcanu_sample10_tig00000876	tig00000876	NA	NA	NA	root (UID1)	5656	56	24	56	0	0	0	0	0	0	0	0	91765	16	4512373	16518813	16	4
NOR_Tryc_subcanu_sample10	tryc	subcanu	sample10	NOR	canu	sub	tryc_subcanu_sample10_tig00000919	tig00000919	NA	NA	NA	root (UID1)	5656	56	24	56	0	0	0	0	0	0	0	0	71069	16	4512373	16518813	16	4
NOR_Tryc_subcanu_sample10	tryc	subcanu	sample10	NOR	canu	sub	tryc_subcanu_sample10_tig00001060	tig00001060	NA	NA	NA	root (UID1)	5656	56	24	56	0	0	0	0	0	0	0	0	43538	16	4512373	16518813	16	4
NOR_Tryc_subcanu_sample10	tryc	subcanu	sample10	NOR	canu	sub	tryc_subcanu_sample10_tig00001240	tig00001240	NA	NA	NA	root (UID1)	5656	56	24	56	0	0	0	0	0	0	0	0	48566	16	4512373	16518813	16	4
NOR_Tryc_subcanu_sample10	tryc	subcanu	sample10	NOR	canu	sub	tryc_subcanu_sample10_tig00002776	tig00002776	NA	NA	NA	root (UID1)	5656	56	24	56	0	0	0	0	0	0	0	0	12491	16	4512373	16518813	16	4
NOR_Tryc_subcanu_sample10	tryc	subcanu	sample10	NOR	canu	sub	tryc_subcanu_sample10_tig00086442	tig00086442	d__Bacteria;p__Proteobacteria	d__Bacteria	p__Proteobacteria	c__Gammaproteobacteria (UID4202)	67	481	276	144	332	5	0	0	0	65.51	1.2	40	2738198	16	4512373	16518813	16	4
NOR_Tryc_subcanu_sample10	tryc	subcanu	sample10	NOR	canu	sub	tryc_subcanu_sample10_tig00086472	tig00086472	NA	NA	NA	root (UID1)	5656	56	24	56	0	0	0	0	0	0	0	0	58124	16	4512373	16518813	16	4
NOR_Tryc_subcanu_sample10	tryc	subcanu	sample10	NOR	canu	sub	tryc_subcanu_sample10_tig00086500	tig00086500	NA	NA	NA	root (UID1)	5656	56	24	56	0	0	0	0	0	0	0	0	25781	16	4512373	16518813	16	4
NOR_Tryc_subcanu_sample11	tryc	subcanu	sample11	NOR	canu	sub	tryc_subcanu_sample11_tig00000001	tig00000001	d__Bacteria;p__Bacteroidota	d__Bacteria	p__Bacteroidota	o__Cytophagales (UID2936)	47	454	336	154	290	10	0	0	0	62.22	1.82	0	4511574	11	4511574	9267068	11	2
NOR_Tryc_subcanu_sample11	tryc	subcanu	sample11	NOR	canu	sub	tryc_subcanu_sample11_tig00000003	tig00000003	d__Bacteria;p__Nitrospirota	d__Bacteria	p__Nitrospirota	k__Bacteria (UID3187)	2258	181	110	61	116	4	0	0	0	60.71	2.05	0	4109264	11	4511574	9267068	11	2
NOR_Tryc_subcanu_sample11	tryc	subcanu	sample11	NOR	canu	sub	tryc_subcanu_sample11_tig00000699	tig00000699	NA	NA	NA	root (UID1)	5656	56	24	56	0	0	0	0	0	0	0	0	193517	11	4511574	9267068	11	2
NOR_Tryc_subcanu_sample11	tryc	subcanu	sample11	NOR	canu	sub	tryc_subcanu_sample11_tig00000948	tig00000948	NA	NA	NA	root (UID1)	5656	56	24	56	0	0	0	0	0	0	0	0	75697	11	4511574	9267068	11	2
NOR_Tryc_subcanu_sample11	tryc	subcanu	sample11	NOR	canu	sub	tryc_subcanu_sample11_tig00000973	tig00000973	NA	NA	NA	root (UID1)	5656	56	24	56	0	0	0	0	0	0	0	0	91814	11	4511574	9267068	11	2
NOR_Tryc_subcanu_sample11	tryc	subcanu	sample11	NOR	canu	sub	tryc_subcanu_sample11_tig00000975	tig00000975	NA	NA	NA	root (UID1)	5656	56	24	56	0	0	0	0	0	0	0	0	43512	11	4511574	9267068	11	2
NOR_Tryc_subcanu_sample11	tryc	subcanu	sample11	NOR	canu	sub	tryc_subcanu_sample11_tig00001004	tig00001004	NA	NA	NA	root (UID1)	5656	56	24	56	0	0	0	0	0	0	0	0	60274	11	4511574	9267068	11	2
NOR_Tryc_subcanu_sample11	tryc	subcanu	sample11	NOR	canu	sub	tryc_subcanu_sample11_tig00002781	tig00002781	NA	NA	NA	root (UID1)	5656	56	24	56	0	0	0	0	0	0	0	0	13477	11	4511574	9267068	11	2
NOR_Tryc_subcanu_sample11	tryc	subcanu	sample11	NOR	canu	sub	tryc_subcanu_sample11_tig00024853	tig00024853	NA	NA	NA	root (UID1)	5656	56	24	56	0	0	0	0	0	0	0	0	43809	11	4511574	9267068	11	2
NOR_Tryc_subcanu_sample11	tryc	subcanu	sample11	NOR	canu	sub	tryc_subcanu_sample11_tig00086875	tig00086875	NA	NA	NA	root (UID1)	5656	56	24	56	0	0	0	0	0	0	0	0	98351	11	4511574	9267068	11	2
NOR_Tryc_subcanu_sample11	tryc	subcanu	sample11	NOR	canu	sub	tryc_subcanu_sample11_tig00086919	tig00086919	NA	NA	NA	root (UID1)	5656	56	24	56	0	0	0	0	0	0	0	0	25779	11	4511574	9267068	11	2
NOR_Tryc_subcanu_sample12	tryc	subcanu	sample12	NOR	canu	sub	tryc_subcanu_sample12_tig00000001	tig00000001	d__Bacteria;p__Bacteroidota	d__Bacteria	p__Bacteroidota	o__Cytophagales (UID2936)	47	454	336	454	0	0	0	0	0	0	0	0	4513441	14	4513441	9341647	14	2
NOR_Tryc_subcanu_sample12	tryc	subcanu	sample12	NOR	canu	sub	tryc_subcanu_sample12_tig00000889	tig00000889	NA	NA	NA	root (UID1)	5656	56	24	56	0	0	0	0	0	0	0	0	75711	14	4513441	9341647	14	2
NOR_Tryc_subcanu_sample12	tryc	subcanu	sample12	NOR	canu	sub	tryc_subcanu_sample12_tig00000963	tig00000963	NA	NA	NA	root (UID1)	5656	56	24	56	0	0	0	0	0	0	0	0	91785	14	4513441	9341647	14	2
NOR_Tryc_subcanu_sample12	tryc	subcanu	sample12	NOR	canu	sub	tryc_subcanu_sample12_tig00000964	tig00000964	NA	NA	NA	root (UID1)	5656	56	24	56	0	0	0	0	0	0	0	0	60190	14	4513441	9341647	14	2
NOR_Tryc_subcanu_sample12	tryc	subcanu	sample12	NOR	canu	sub	tryc_subcanu_sample12_tig00001029	tig00001029	NA	NA	NA	root (UID1)	5656	56	24	56	0	0	0	0	0	0	0	0	43603	14	4513441	9341647	14	2
NOR_Tryc_subcanu_sample12	tryc	subcanu	sample12	NOR	canu	sub	tryc_subcanu_sample12_tig00001070	tig00001070	NA	NA	NA	root (UID1)	5656	56	24	56	0	0	0	0	0	0	0	0	99235	14	4513441	9341647	14	2
NOR_Tryc_subcanu_sample12	tryc	subcanu	sample12	NOR	canu	sub	tryc_subcanu_sample12_tig00001847	tig00001847	NA	NA	NA	root (UID1)	5656	56	24	56	0	0	0	0	0	0	0	0	27975	14	4513441	9341647	14	2
NOR_Tryc_subcanu_sample12	tryc	subcanu	sample12	NOR	canu	sub	tryc_subcanu_sample12_tig00002186	tig00002186	NA	NA	NA	root (UID1)	5656	56	24	56	0	0	0	0	0	0	0	0	43843	14	4513441	9341647	14	2
NOR_Tryc_subcanu_sample12	tryc	subcanu	sample12	NOR	canu	sub	tryc_subcanu_sample12_tig00002310	tig00002310	NA	NA	NA	root (UID1)	5656	56	24	56	0	0	0	0	0	0	0	0	5395	14	4513441	9341647	14	2
NOR_Tryc_subcanu_sample12	tryc	subcanu	sample12	NOR	canu	sub	tryc_subcanu_sample12_tig00002784	tig00002784	NA	NA	NA	root (UID1)	5656	56	24	56	0	0	0	0	0	0	0	0	13589	14	4513441	9341647	14	2
NOR_Tryc_subcanu_sample12	tryc	subcanu	sample12	NOR	canu	sub	tryc_subcanu_sample12_tig00086517	tig00086517	d__Bacteria;p__Nitrospirota	d__Bacteria	p__Nitrospirota	k__Bacteria (UID3187)	2258	181	110	181	0	0	0	0	0	0	0	0	4107200	14	4513441	9341647	14	2
NOR_Tryc_subcanu_sample12	tryc	subcanu	sample12	NOR	canu	sub	tryc_subcanu_sample12_tig00086537	tig00086537	NA	NA	NA	root (UID1)	5656	56	24	56	0	0	0	0	0	0	0	0	190796	14	4513441	9341647	14	2
NOR_Tryc_subcanu_sample12	tryc	subcanu	sample12	NOR	canu	sub	tryc_subcanu_sample12_tig00086541	tig00086541	NA	NA	NA	root (UID1)	5656	56	24	56	0	0	0	0	0	0	0	0	61958	14	4513441	9341647	14	2
NOR_Tryc_subcanu_sample12	tryc	subcanu	sample12	NOR	canu	sub	tryc_subcanu_sample12_tig00086637	tig00086637	NA	NA	NA	root (UID1)	5656	56	24	56	0	0	0	0	0	0	0	0	6926	14	4513441	9341647	14	2
NOR_Tryc_subflye_sample01	tryc	subflye	sample01	NOR	flye	sub	tryc_subflye_sample01_contig105	contig105	d__Bacteria;p__Bacteroidota	d__Bacteria	p__Bacteroidota	o__Cytophagales (UID2936)	47	454	336	454	0	0	0	0	0	0	0	0	4520944	79	5210854	29929367	79	7
NOR_Tryc_subflye_sample01	tryc	subflye	sample01	NOR	flye	sub	NA	contig1067	NA	NA	NA	NA	NA	NA	NA	NA	NA	NA	NA	NA	NA	NA	NA	NA	36270	79	5210854	29929367	79	7
NOR_Tryc_subflye_sample01	tryc	subflye	sample01	NOR	flye	sub	tryc_subflye_sample01_contig1093	contig1093	NA	NA	NA	root (UID1)	5656	56	24	56	0	0	0	0	0	0	0	0	4297	79	5210854	29929367	79	7
NOR_Tryc_subflye_sample01	tryc	subflye	sample01	NOR	flye	sub	tryc_subflye_sample01_contig114	contig114	d__Bacteria;p__Proteobacteria	d__Bacteria	p__Proteobacteria	c__Gammaproteobacteria (UID4201)	1164	275	174	86	186	3	0	0	0	61.44	0.64	33.33	2616216	79	5210854	29929367	79	7
NOR_Tryc_subflye_sample01	tryc	subflye	sample01	NOR	flye	sub	tryc_subflye_sample01_contig1152	contig1152	NA	NA	NA	root (UID1)	5656	56	24	56	0	0	0	0	0	0	0	0	12962	79	5210854	29929367	79	7
NOR_Tryc_subflye_sample01	tryc	subflye	sample01	NOR	flye	sub	tryc_subflye_sample01_contig1167	contig1167	NA	NA	NA	root (UID1)	5656	56	24	56	0	0	0	0	0	0	0	0	7722	79	5210854	29929367	79	7
NOR_Tryc_subflye_sample01	tryc	subflye	sample01	NOR	flye	sub	tryc_subflye_sample01_contig1172	contig1172	NA	NA	NA	root (UID1)	5656	56	24	56	0	0	0	0	0	0	0	0	16918	79	5210854	29929367	79	7
NOR_Tryc_subflye_sample01	tryc	subflye	sample01	NOR	flye	sub	tryc_subflye_sample01_contig1199	contig1199	NA	NA	NA	root (UID1)	5656	56	24	56	0	0	0	0	0	0	0	0	7394	79	5210854	29929367	79	7
NOR_Tryc_subflye_sample01	tryc	subflye	sample01	NOR	flye	sub	tryc_subflye_sample01_contig1257	contig1257	NA	NA	NA	root (UID1)	5656	56	24	56	0	0	0	0	0	0	0	0	32263	79	5210854	29929367	79	7
NOR_Tryc_subflye_sample01	tryc	subflye	sample01	NOR	flye	sub	tryc_subflye_sample01_contig1354	contig1354	NA	NA	NA	root (UID1)	5656	56	24	56	0	0	0	0	0	0	0	0	518	79	5210854	29929367	79	7
NOR_Tryc_subflye_sample01	tryc	subflye	sample01	NOR	flye	sub	tryc_subflye_sample01_contig1418	contig1418	NA	NA	NA	root (UID1)	5656	56	24	56	0	0	0	0	0	0	0	0	3695	79	5210854	29929367	79	7
NOR_Tryc_subflye_sample01	tryc	subflye	sample01	NOR	flye	sub	tryc_subflye_sample01_contig1437	contig1437	NA	NA	NA	root (UID1)	5656	56	24	56	0	0	0	0	0	0	0	0	42409	79	5210854	29929367	79	7
NOR_Tryc_subflye_sample01	tryc	subflye	sample01	NOR	flye	sub	tryc_subflye_sample01_contig1503	contig1503	NA	NA	NA	root (UID1)	5656	56	24	56	0	0	0	0	0	0	0	0	1269	79	5210854	29929367	79	7
NOR_Tryc_subflye_sample01	tryc	subflye	sample01	NOR	flye	sub	tryc_subflye_sample01_contig1541	contig1541	NA	NA	NA	root (UID1)	5656	56	24	56	0	0	0	0	0	0	0	0	5410	79	5210854	29929367	79	7
NOR_Tryc_subflye_sample01	tryc	subflye	sample01	NOR	flye	sub	tryc_subflye_sample01_contig1542	contig1542	NA	NA	NA	root (UID1)	5656	56	24	56	0	0	0	0	0	0	0	0	10777	79	5210854	29929367	79	7
NOR_Tryc_subflye_sample01	tryc	subflye	sample01	NOR	flye	sub	tryc_subflye_sample01_contig1586	contig1586	NA	NA	NA	root (UID1)	5656	56	24	56	0	0	0	0	0	0	0	0	1942	79	5210854	29929367	79	7
NOR_Tryc_subflye_sample01	tryc	subflye	sample01	NOR	flye	sub	tryc_subflye_sample01_contig1587	contig1587	NA	NA	NA	root (UID1)	5656	56	24	56	0	0	0	0	0	0	0	0	6494	79	5210854	29929367	79	7
NOR_Tryc_subflye_sample01	tryc	subflye	sample01	NOR	flye	sub	tryc_subflye_sample01_contig1643	contig1643	NA	NA	NA	root (UID1)	5656	56	24	56	0	0	0	0	0	0	0	0	27327	79	5210854	29929367	79	7
NOR_Tryc_subflye_sample01	tryc	subflye	sample01	NOR	flye	sub	tryc_subflye_sample01_contig167	contig167	d__Bacteria;p__Bacteroidota	d__Bacteria	p__Bacteroidota	o__Cytophagales (UID2936)	47	454	336	71	377	5	1	0	0	82.3	1.55	0	4115318	79	5210854	29929367	79	7
NOR_Tryc_subflye_sample01	tryc	subflye	sample01	NOR	flye	sub	tryc_subflye_sample01_contig1709	contig1709	NA	NA	NA	root (UID1)	5656	56	24	56	0	0	0	0	0	0	0	0	6598	79	5210854	29929367	79	7
NOR_Tryc_subflye_sample01	tryc	subflye	sample01	NOR	flye	sub	tryc_subflye_sample01_contig1886	contig1886	NA	NA	NA	root (UID1)	5656	56	24	56	0	0	0	0	0	0	0	0	19289	79	5210854	29929367	79	7
NOR_Tryc_subflye_sample01	tryc	subflye	sample01	NOR	flye	sub	tryc_subflye_sample01_contig1895	contig1895	NA	NA	NA	root (UID1)	5656	56	24	56	0	0	0	0	0	0	0	0	5729	79	5210854	29929367	79	7
NOR_Tryc_subflye_sample01	tryc	subflye	sample01	NOR	flye	sub	tryc_subflye_sample01_contig1899	contig1899	NA	NA	NA	root (UID1)	5656	56	24	56	0	0	0	0	0	0	0	0	31253	79	5210854	29929367	79	7
NOR_Tryc_subflye_sample01	tryc	subflye	sample01	NOR	flye	sub	tryc_subflye_sample01_contig1900	contig1900	NA	NA	NA	root (UID1)	5656	56	24	56	0	0	0	0	0	0	0	0	3615	79	5210854	29929367	79	7
NOR_Tryc_subflye_sample01	tryc	subflye	sample01	NOR	flye	sub	tryc_subflye_sample01_contig1908	contig1908	NA	NA	NA	root (UID1)	5656	56	24	56	0	0	0	0	0	0	0	0	6477	79	5210854	29929367	79	7
NOR_Tryc_subflye_sample01	tryc	subflye	sample01	NOR	flye	sub	tryc_subflye_sample01_contig193	contig193	d__Bacteria;p__Nitrospirota	d__Bacteria	p__Nitrospirota	k__Bacteria (UID3187)	2258	181	110	42	137	2	0	0	0	70.09	1.82	0	4106156	79	5210854	29929367	79	7
NOR_Tryc_subflye_sample01	tryc	subflye	sample01	NOR	flye	sub	tryc_subflye_sample01_contig1998	contig1998	NA	NA	NA	root (UID1)	5656	56	24	56	0	0	0	0	0	0	0	0	4096	79	5210854	29929367	79	7
NOR_Tryc_subflye_sample01	tryc	subflye	sample01	NOR	flye	sub	tryc_subflye_sample01_contig2058	contig2058	NA	NA	NA	root (UID1)	5656	56	24	56	0	0	0	0	0	0	0	0	3636	79	5210854	29929367	79	7
NOR_Tryc_subflye_sample01	tryc	subflye	sample01	NOR	flye	sub	tryc_subflye_sample01_contig2154	contig2154	NA	NA	NA	root (UID1)	5656	56	24	56	0	0	0	0	0	0	0	0	1995	79	5210854	29929367	79	7
NOR_Tryc_subflye_sample01	tryc	subflye	sample01	NOR	flye	sub	tryc_subflye_sample01_contig2233	contig2233	NA	NA	NA	root (UID1)	5656	56	24	56	0	0	0	0	0	0	0	0	709	79	5210854	29929367	79	7
NOR_Tryc_subflye_sample01	tryc	subflye	sample01	NOR	flye	sub	tryc_subflye_sample01_contig2251	contig2251	NA	NA	NA	root (UID1)	5656	56	24	56	0	0	0	0	0	0	0	0	7813	79	5210854	29929367	79	7
NOR_Tryc_subflye_sample01	tryc	subflye	sample01	NOR	flye	sub	tryc_subflye_sample01_contig2273	contig2273	NA	NA	NA	root (UID1)	5656	56	24	56	0	0	0	0	0	0	0	0	17848	79	5210854	29929367	79	7
NOR_Tryc_subflye_sample01	tryc	subflye	sample01	NOR	flye	sub	tryc_subflye_sample01_contig228	contig228	NA	NA	NA	root (UID1)	5656	56	24	56	0	0	0	0	0	0	0	0	196946	79	5210854	29929367	79	7
NOR_Tryc_subflye_sample01	tryc	subflye	sample01	NOR	flye	sub	tryc_subflye_sample01_contig2282	contig2282	NA	NA	NA	root (UID1)	5656	56	24	56	0	0	0	0	0	0	0	0	2380	79	5210854	29929367	79	7
NOR_Tryc_subflye_sample01	tryc	subflye	sample01	NOR	flye	sub	tryc_subflye_sample01_contig2298	contig2298	NA	NA	NA	root (UID1)	5656	56	24	56	0	0	0	0	0	0	0	0	21024	79	5210854	29929367	79	7
NOR_Tryc_subflye_sample01	tryc	subflye	sample01	NOR	flye	sub	tryc_subflye_sample01_contig2308	contig2308	NA	NA	NA	root (UID1)	5656	56	24	56	0	0	0	0	0	0	0	0	15615	79	5210854	29929367	79	7
NOR_Tryc_subflye_sample01	tryc	subflye	sample01	NOR	flye	sub	tryc_subflye_sample01_contig2316	contig2316	NA	NA	NA	root (UID1)	5656	56	24	56	0	0	0	0	0	0	0	0	11958	79	5210854	29929367	79	7
NOR_Tryc_subflye_sample01	tryc	subflye	sample01	NOR	flye	sub	tryc_subflye_sample01_contig2324	contig2324	NA	NA	NA	root (UID1)	5656	56	24	56	0	0	0	0	0	0	0	0	2985	79	5210854	29929367	79	7
NOR_Tryc_subflye_sample01	tryc	subflye	sample01	NOR	flye	sub	tryc_subflye_sample01_contig2327	contig2327	NA	NA	NA	root (UID1)	5656	56	24	56	0	0	0	0	0	0	0	0	21021	79	5210854	29929367	79	7
NOR_Tryc_subflye_sample01	tryc	subflye	sample01	NOR	flye	sub	tryc_subflye_sample01_contig2332	contig2332	NA	NA	NA	root (UID1)	5656	56	24	56	0	0	0	0	0	0	0	0	20273	79	5210854	29929367	79	7
NOR_Tryc_subflye_sample01	tryc	subflye	sample01	NOR	flye	sub	tryc_subflye_sample01_contig2337	contig2337	NA	NA	NA	root (UID1)	5656	56	24	56	0	0	0	0	0	0	0	0	15685	79	5210854	29929367	79	7
NOR_Tryc_subflye_sample01	tryc	subflye	sample01	NOR	flye	sub	tryc_subflye_sample01_contig2338	contig2338	NA	NA	NA	root (UID1)	5656	56	24	56	0	0	0	0	0	0	0	0	1957	79	5210854	29929367	79	7
NOR_Tryc_subflye_sample01	tryc	subflye	sample01	NOR	flye	sub	tryc_subflye_sample01_contig235	contig235	NA	NA	NA	root (UID1)	5656	56	24	56	0	0	0	0	0	0	0	0	57982	79	5210854	29929367	79	7
NOR_Tryc_subflye_sample01	tryc	subflye	sample01	NOR	flye	sub	tryc_subflye_sample01_contig2351	contig2351	NA	NA	NA	root (UID1)	5656	56	24	56	0	0	0	0	0	0	0	0	8364	79	5210854	29929367	79	7
NOR_Tryc_subflye_sample01	tryc	subflye	sample01	NOR	flye	sub	tryc_subflye_sample01_contig2355	contig2355	NA	NA	NA	root (UID1)	5656	56	24	56	0	0	0	0	0	0	0	0	10565	79	5210854	29929367	79	7
NOR_Tryc_subflye_sample01	tryc	subflye	sample01	NOR	flye	sub	tryc_subflye_sample01_contig2356	contig2356	NA	NA	NA	root (UID1)	5656	56	24	56	0	0	0	0	0	0	0	0	5400	79	5210854	29929367	79	7
NOR_Tryc_subflye_sample01	tryc	subflye	sample01	NOR	flye	sub	tryc_subflye_sample01_contig2361	contig2361	NA	NA	NA	root (UID1)	5656	56	24	56	0	0	0	0	0	0	0	0	4014	79	5210854	29929367	79	7
NOR_Tryc_subflye_sample01	tryc	subflye	sample01	NOR	flye	sub	tryc_subflye_sample01_contig2362	contig2362	NA	NA	NA	root (UID1)	5656	56	24	56	0	0	0	0	0	0	0	0	4985	79	5210854	29929367	79	7
NOR_Tryc_subflye_sample01	tryc	subflye	sample01	NOR	flye	sub	tryc_subflye_sample01_contig2363	contig2363	NA	NA	NA	root (UID1)	5656	56	24	56	0	0	0	0	0	0	0	0	9938	79	5210854	29929367	79	7
NOR_Tryc_subflye_sample01	tryc	subflye	sample01	NOR	flye	sub	tryc_subflye_sample01_contig2364	contig2364	NA	NA	NA	root (UID1)	5656	56	24	56	0	0	0	0	0	0	0	0	5550	79	5210854	29929367	79	7
NOR_Tryc_subflye_sample01	tryc	subflye	sample01	NOR	flye	sub	NA	contig2371	NA	NA	NA	NA	NA	NA	NA	NA	NA	NA	NA	NA	NA	NA	NA	NA	4828	79	5210854	29929367	79	7
NOR_Tryc_subflye_sample01	tryc	subflye	sample01	NOR	flye	sub	tryc_subflye_sample01_contig2375	contig2375	NA	NA	NA	root (UID1)	5656	56	24	56	0	0	0	0	0	0	0	0	87913	79	5210854	29929367	79	7
NOR_Tryc_subflye_sample01	tryc	subflye	sample01	NOR	flye	sub	tryc_subflye_sample01_contig2380	contig2380	NA	NA	NA	root (UID1)	5656	56	24	56	0	0	0	0	0	0	0	0	78127	79	5210854	29929367	79	7
NOR_Tryc_subflye_sample01	tryc	subflye	sample01	NOR	flye	sub	tryc_subflye_sample01_contig242	contig242	NA	NA	NA	root (UID1)	5656	56	24	56	0	0	0	0	0	0	0	0	6568	79	5210854	29929367	79	7
NOR_Tryc_subflye_sample01	tryc	subflye	sample01	NOR	flye	sub	tryc_subflye_sample01_contig266	contig266	NA	NA	NA	root (UID1)	5656	56	24	56	0	0	0	0	0	0	0	0	39564	79	5210854	29929367	79	7
NOR_Tryc_subflye_sample01	tryc	subflye	sample01	NOR	flye	sub	tryc_subflye_sample01_contig311	contig311	NA	NA	NA	root (UID1)	5656	56	24	56	0	0	0	0	0	0	0	0	2496	79	5210854	29929367	79	7
NOR_Tryc_subflye_sample01	tryc	subflye	sample01	NOR	flye	sub	tryc_subflye_sample01_contig315	contig315	NA	NA	NA	root (UID1)	5656	56	24	56	0	0	0	0	0	0	0	0	3718	79	5210854	29929367	79	7
NOR_Tryc_subflye_sample01	tryc	subflye	sample01	NOR	flye	sub	tryc_subflye_sample01_contig317	contig317	NA	NA	NA	root (UID1)	5656	56	24	56	0	0	0	0	0	0	0	0	5898	79	5210854	29929367	79	7
NOR_Tryc_subflye_sample01	tryc	subflye	sample01	NOR	flye	sub	tryc_subflye_sample01_contig326	contig326	NA	NA	NA	root (UID1)	5656	56	24	56	0	0	0	0	0	0	0	0	31694	79	5210854	29929367	79	7
NOR_Tryc_subflye_sample01	tryc	subflye	sample01	NOR	flye	sub	tryc_subflye_sample01_contig339	contig339	NA	NA	NA	root (UID1)	5656	56	24	56	0	0	0	0	0	0	0	0	5179	79	5210854	29929367	79	7
NOR_Tryc_subflye_sample01	tryc	subflye	sample01	NOR	flye	sub	tryc_subflye_sample01_contig347	contig347	NA	NA	NA	root (UID1)	5656	56	24	56	0	0	0	0	0	0	0	0	4939	79	5210854	29929367	79	7
NOR_Tryc_subflye_sample01	tryc	subflye	sample01	NOR	flye	sub	tryc_subflye_sample01_contig365	contig365	d__Bacteria;p__Proteobacteria	d__Bacteria	p__Proteobacteria	f__Rhodobacteraceae (UID3340)	84	568	330	360	208	0	0	0	0	35.57	0	0	3787546	79	5210854	29929367	79	7
NOR_Tryc_subflye_sample01	tryc	subflye	sample01	NOR	flye	sub	tryc_subflye_sample01_contig4	contig4	d__Bacteria;p__Actinobacteriota	d__Bacteria	p__Actinobacteriota	g__Mycobacterium (UID1816)	100	693	300	103	588	2	0	0	0	85.59	0.67	0	5210854	79	5210854	29929367	79	7
NOR_Tryc_subflye_sample01	tryc	subflye	sample01	NOR	flye	sub	tryc_subflye_sample01_contig434	contig434	NA	NA	NA	root (UID1)	5656	56	24	56	0	0	0	0	0	0	0	0	3253	79	5210854	29929367	79	7
NOR_Tryc_subflye_sample01	tryc	subflye	sample01	NOR	flye	sub	tryc_subflye_sample01_contig451	contig451	NA	NA	NA	root (UID1)	5656	56	24	56	0	0	0	0	0	0	0	0	16647	79	5210854	29929367	79	7
NOR_Tryc_subflye_sample01	tryc	subflye	sample01	NOR	flye	sub	tryc_subflye_sample01_contig548	contig548	NA	NA	NA	root (UID1)	5656	56	24	56	0	0	0	0	0	0	0	0	1676	79	5210854	29929367	79	7
NOR_Tryc_subflye_sample01	tryc	subflye	sample01	NOR	flye	sub	tryc_subflye_sample01_contig559	contig559	NA	NA	NA	root (UID1)	5656	56	24	56	0	0	0	0	0	0	0	0	43111	79	5210854	29929367	79	7
NOR_Tryc_subflye_sample01	tryc	subflye	sample01	NOR	flye	sub	tryc_subflye_sample01_contig577	contig577	NA	NA	NA	root (UID1)	5656	56	24	56	0	0	0	0	0	0	0	0	38104	79	5210854	29929367	79	7
NOR_Tryc_subflye_sample01	tryc	subflye	sample01	NOR	flye	sub	tryc_subflye_sample01_contig667	contig667	NA	NA	NA	root (UID1)	5656	56	24	56	0	0	0	0	0	0	0	0	11344	79	5210854	29929367	79	7
NOR_Tryc_subflye_sample01	tryc	subflye	sample01	NOR	flye	sub	tryc_subflye_sample01_contig730	contig730	NA	NA	NA	root (UID1)	5656	56	24	56	0	0	0	0	0	0	0	0	2902	79	5210854	29929367	79	7
NOR_Tryc_subflye_sample01	tryc	subflye	sample01	NOR	flye	sub	tryc_subflye_sample01_contig758	contig758	NA	NA	NA	root (UID1)	5656	56	24	56	0	0	0	0	0	0	0	0	4585	79	5210854	29929367	79	7
NOR_Tryc_subflye_sample01	tryc	subflye	sample01	NOR	flye	sub	tryc_subflye_sample01_contig828	contig828	d__Bacteria;p__Bacteroidota	d__Bacteria	p__Bacteroidota	p__Bacteroidetes (UID2591)	364	303	203	93	206	4	0	0	0	63.22	1.07	0	3960376	79	5210854	29929367	79	7
NOR_Tryc_subflye_sample01	tryc	subflye	sample01	NOR	flye	sub	tryc_subflye_sample01_contig856	contig856	NA	NA	NA	root (UID1)	5656	56	24	56	0	0	0	0	0	0	0	0	21021	79	5210854	29929367	79	7
NOR_Tryc_subflye_sample01	tryc	subflye	sample01	NOR	flye	sub	tryc_subflye_sample01_contig859	contig859	NA	NA	NA	root (UID1)	5656	56	24	56	0	0	0	0	0	0	0	0	5371	79	5210854	29929367	79	7
NOR_Tryc_subflye_sample01	tryc	subflye	sample01	NOR	flye	sub	tryc_subflye_sample01_contig873	contig873	NA	NA	NA	root (UID1)	5656	56	24	56	0	0	0	0	0	0	0	0	139848	79	5210854	29929367	79	7
NOR_Tryc_subflye_sample01	tryc	subflye	sample01	NOR	flye	sub	tryc_subflye_sample01_contig874	contig874	NA	NA	NA	root (UID1)	5656	56	24	56	0	0	0	0	0	0	0	0	120206	79	5210854	29929367	79	7
NOR_Tryc_subflye_sample01	tryc	subflye	sample01	NOR	flye	sub	tryc_subflye_sample01_contig875	contig875	NA	NA	NA	root (UID1)	5656	56	24	56	0	0	0	0	0	0	0	0	184165	79	5210854	29929367	79	7
NOR_Tryc_subflye_sample01	tryc	subflye	sample01	NOR	flye	sub	tryc_subflye_sample01_contig901	contig901	NA	NA	NA	root (UID1)	5656	56	24	56	0	0	0	0	0	0	0	0	2541	79	5210854	29929367	79	7
NOR_Tryc_subflye_sample01	tryc	subflye	sample01	NOR	flye	sub	tryc_subflye_sample01_contig914	contig914	NA	NA	NA	root (UID1)	5656	56	24	56	0	0	0	0	0	0	0	0	2892	79	5210854	29929367	79	7
NOR_Tryc_subflye_sample02	tryc	subflye	sample02	NOR	flye	sub	tryc_subflye_sample02_contig1	contig1	d__Bacteria;p__Bacteroidota	d__Bacteria	p__Bacteroidota	p__Bacteroidetes (UID2591)	364	303	203	84	213	6	0	0	0	67.33	1.74	0	3960301	69	4520964	21855750	69	5
NOR_Tryc_subflye_sample02	tryc	subflye	sample02	NOR	flye	sub	tryc_subflye_sample02_contig102	contig102	d__Bacteria;p__Bacteroidota	d__Bacteria	p__Bacteroidota	o__Cytophagales (UID2936)	47	454	336	97	353	4	0	0	0	77.07	0.79	0	4520964	69	4520964	21855750	69	5
NOR_Tryc_subflye_sample02	tryc	subflye	sample02	NOR	flye	sub	tryc_subflye_sample02_contig1040	contig1040	NA	NA	NA	root (UID1)	5656	56	24	56	0	0	0	0	0	0	0	0	8594	69	4520964	21855750	69	5
NOR_Tryc_subflye_sample02	tryc	subflye	sample02	NOR	flye	sub	tryc_subflye_sample02_contig1289	contig1289	NA	NA	NA	root (UID1)	5656	56	24	56	0	0	0	0	0	0	0	0	12058	69	4520964	21855750	69	5
NOR_Tryc_subflye_sample02	tryc	subflye	sample02	NOR	flye	sub	tryc_subflye_sample02_contig1350	contig1350	NA	NA	NA	root (UID1)	5656	56	24	56	0	0	0	0	0	0	0	0	42426	69	4520964	21855750	69	5
NOR_Tryc_subflye_sample02	tryc	subflye	sample02	NOR	flye	sub	tryc_subflye_sample02_contig1393	contig1393	NA	NA	NA	root (UID1)	5656	56	24	56	0	0	0	0	0	0	0	0	3709	69	4520964	21855750	69	5
NOR_Tryc_subflye_sample02	tryc	subflye	sample02	NOR	flye	sub	tryc_subflye_sample02_contig1418	contig1418	NA	NA	NA	root (UID1)	5656	56	24	56	0	0	0	0	0	0	0	0	7842	69	4520964	21855750	69	5
NOR_Tryc_subflye_sample02	tryc	subflye	sample02	NOR	flye	sub	tryc_subflye_sample02_contig153	contig153	NA	NA	NA	root (UID1)	5656	56	24	56	0	0	0	0	0	0	0	0	17505	69	4520964	21855750	69	5
NOR_Tryc_subflye_sample02	tryc	subflye	sample02	NOR	flye	sub	tryc_subflye_sample02_contig1591	contig1591	NA	NA	NA	root (UID1)	5656	56	24	56	0	0	0	0	0	0	0	0	6761	69	4520964	21855750	69	5
NOR_Tryc_subflye_sample02	tryc	subflye	sample02	NOR	flye	sub	tryc_subflye_sample02_contig1618	contig1618	NA	NA	NA	root (UID1)	5656	56	24	56	0	0	0	0	0	0	0	0	11058	69	4520964	21855750	69	5
NOR_Tryc_subflye_sample02	tryc	subflye	sample02	NOR	flye	sub	tryc_subflye_sample02_contig1664	contig1664	NA	NA	NA	root (UID1)	5656	56	24	56	0	0	0	0	0	0	0	0	1259	69	4520964	21855750	69	5
NOR_Tryc_subflye_sample02	tryc	subflye	sample02	NOR	flye	sub	tryc_subflye_sample02_contig1848	contig1848	NA	NA	NA	root (UID1)	5656	56	24	56	0	0	0	0	0	0	0	0	32166	69	4520964	21855750	69	5
NOR_Tryc_subflye_sample02	tryc	subflye	sample02	NOR	flye	sub	tryc_subflye_sample02_contig1868	contig1868	NA	NA	NA	root (UID1)	5656	56	24	56	0	0	0	0	0	0	0	0	4106	69	4520964	21855750	69	5
NOR_Tryc_subflye_sample02	tryc	subflye	sample02	NOR	flye	sub	tryc_subflye_sample02_contig1972	contig1972	NA	NA	NA	root (UID1)	5656	56	24	56	0	0	0	0	0	0	0	0	32185	69	4520964	21855750	69	5
NOR_Tryc_subflye_sample02	tryc	subflye	sample02	NOR	flye	sub	tryc_subflye_sample02_contig2005	contig2005	NA	NA	NA	root (UID1)	5656	56	24	56	0	0	0	0	0	0	0	0	9894	69	4520964	21855750	69	5
NOR_Tryc_subflye_sample02	tryc	subflye	sample02	NOR	flye	sub	tryc_subflye_sample02_contig2031	contig2031	NA	NA	NA	root (UID1)	5656	56	24	56	0	0	0	0	0	0	0	0	5025	69	4520964	21855750	69	5
NOR_Tryc_subflye_sample02	tryc	subflye	sample02	NOR	flye	sub	tryc_subflye_sample02_contig2053	contig2053	NA	NA	NA	root (UID1)	5656	56	24	56	0	0	0	0	0	0	0	0	3721	69	4520964	21855750	69	5
NOR_Tryc_subflye_sample02	tryc	subflye	sample02	NOR	flye	sub	tryc_subflye_sample02_contig2054	contig2054	NA	NA	NA	root (UID1)	5656	56	24	56	0	0	0	0	0	0	0	0	6590	69	4520964	21855750	69	5
NOR_Tryc_subflye_sample02	tryc	subflye	sample02	NOR	flye	sub	tryc_subflye_sample02_contig217	contig217	NA	NA	NA	root (UID1)	5656	56	24	56	0	0	0	0	0	0	0	0	184455	69	4520964	21855750	69	5
NOR_Tryc_subflye_sample02	tryc	subflye	sample02	NOR	flye	sub	tryc_subflye_sample02_contig2195	contig2195	NA	NA	NA	root (UID1)	5656	56	24	56	0	0	0	0	0	0	0	0	3620	69	4520964	21855750	69	5
NOR_Tryc_subflye_sample02	tryc	subflye	sample02	NOR	flye	sub	NA	contig2224	NA	NA	NA	NA	NA	NA	NA	NA	NA	NA	NA	NA	NA	NA	NA	NA	562	69	4520964	21855750	69	5
NOR_Tryc_subflye_sample02	tryc	subflye	sample02	NOR	flye	sub	tryc_subflye_sample02_contig2231	contig2231	NA	NA	NA	root (UID1)	5656	56	24	56	0	0	0	0	0	0	0	0	7398	69	4520964	21855750	69	5
NOR_Tryc_subflye_sample02	tryc	subflye	sample02	NOR	flye	sub	tryc_subflye_sample02_contig2245	contig2245	NA	NA	NA	root (UID1)	5656	56	24	56	0	0	0	0	0	0	0	0	8340	69	4520964	21855750	69	5
NOR_Tryc_subflye_sample02	tryc	subflye	sample02	NOR	flye	sub	tryc_subflye_sample02_contig2253	contig2253	NA	NA	NA	root (UID1)	5656	56	24	56	0	0	0	0	0	0	0	0	17577	69	4520964	21855750	69	5
NOR_Tryc_subflye_sample02	tryc	subflye	sample02	NOR	flye	sub	tryc_subflye_sample02_contig2265	contig2265	NA	NA	NA	root (UID1)	5656	56	24	56	0	0	0	0	0	0	0	0	20978	69	4520964	21855750	69	5
NOR_Tryc_subflye_sample02	tryc	subflye	sample02	NOR	flye	sub	tryc_subflye_sample02_contig2275	contig2275	NA	NA	NA	root (UID1)	5656	56	24	56	0	0	0	0	0	0	0	0	2999	69	4520964	21855750	69	5
NOR_Tryc_subflye_sample02	tryc	subflye	sample02	NOR	flye	sub	tryc_subflye_sample02_contig2282	contig2282	NA	NA	NA	root (UID1)	5656	56	24	56	0	0	0	0	0	0	0	0	8811	69	4520964	21855750	69	5
NOR_Tryc_subflye_sample02	tryc	subflye	sample02	NOR	flye	sub	tryc_subflye_sample02_contig2293	contig2293	NA	NA	NA	root (UID1)	5656	56	24	56	0	0	0	0	0	0	0	0	57996	69	4520964	21855750	69	5
NOR_Tryc_subflye_sample02	tryc	subflye	sample02	NOR	flye	sub	tryc_subflye_sample02_contig2302	contig2302	NA	NA	NA	root (UID1)	5656	56	24	56	0	0	0	0	0	0	0	0	16469	69	4520964	21855750	69	5
NOR_Tryc_subflye_sample02	tryc	subflye	sample02	NOR	flye	sub	tryc_subflye_sample02_contig2310	contig2310	NA	NA	NA	root (UID1)	5656	56	24	56	0	0	0	0	0	0	0	0	4168	69	4520964	21855750	69	5
NOR_Tryc_subflye_sample02	tryc	subflye	sample02	NOR	flye	sub	tryc_subflye_sample02_contig2315	contig2315	NA	NA	NA	root (UID1)	5656	56	24	56	0	0	0	0	0	0	0	0	1362	69	4520964	21855750	69	5
NOR_Tryc_subflye_sample02	tryc	subflye	sample02	NOR	flye	sub	tryc_subflye_sample02_contig2318	contig2318	NA	NA	NA	root (UID1)	5656	56	24	56	0	0	0	0	0	0	0	0	20248	69	4520964	21855750	69	5
NOR_Tryc_subflye_sample02	tryc	subflye	sample02	NOR	flye	sub	tryc_subflye_sample02_contig2319	contig2319	NA	NA	NA	root (UID1)	5656	56	24	56	0	0	0	0	0	0	0	0	39540	69	4520964	21855750	69	5
NOR_Tryc_subflye_sample02	tryc	subflye	sample02	NOR	flye	sub	tryc_subflye_sample02_contig2328	contig2328	NA	NA	NA	root (UID1)	5656	56	24	56	0	0	0	0	0	0	0	0	4003	69	4520964	21855750	69	5
NOR_Tryc_subflye_sample02	tryc	subflye	sample02	NOR	flye	sub	tryc_subflye_sample02_contig2329	contig2329	NA	NA	NA	root (UID1)	5656	56	24	56	0	0	0	0	0	0	0	0	4956	69	4520964	21855750	69	5
NOR_Tryc_subflye_sample02	tryc	subflye	sample02	NOR	flye	sub	tryc_subflye_sample02_contig2334	contig2334	NA	NA	NA	root (UID1)	5656	56	24	56	0	0	0	0	0	0	0	0	9100	69	4520964	21855750	69	5
NOR_Tryc_subflye_sample02	tryc	subflye	sample02	NOR	flye	sub	tryc_subflye_sample02_contig2341	contig2341	NA	NA	NA	root (UID1)	5656	56	24	56	0	0	0	0	0	0	0	0	17395	69	4520964	21855750	69	5
NOR_Tryc_subflye_sample02	tryc	subflye	sample02	NOR	flye	sub	tryc_subflye_sample02_contig2342	contig2342	NA	NA	NA	root (UID1)	5656	56	24	56	0	0	0	0	0	0	0	0	9919	69	4520964	21855750	69	5
NOR_Tryc_subflye_sample02	tryc	subflye	sample02	NOR	flye	sub	tryc_subflye_sample02_contig2344	contig2344	NA	NA	NA	root (UID1)	5656	56	24	56	0	0	0	0	0	0	0	0	15611	69	4520964	21855750	69	5
NOR_Tryc_subflye_sample02	tryc	subflye	sample02	NOR	flye	sub	tryc_subflye_sample02_contig2354	contig2354	NA	NA	NA	root (UID1)	5656	56	24	56	0	0	0	0	0	0	0	0	5550	69	4520964	21855750	69	5
NOR_Tryc_subflye_sample02	tryc	subflye	sample02	NOR	flye	sub	tryc_subflye_sample02_contig2355	contig2355	NA	NA	NA	root (UID1)	5656	56	24	56	0	0	0	0	0	0	0	0	36266	69	4520964	21855750	69	5
NOR_Tryc_subflye_sample02	tryc	subflye	sample02	NOR	flye	sub	tryc_subflye_sample02_contig2363	contig2363	NA	NA	NA	root (UID1)	5656	56	24	56	0	0	0	0	0	0	0	0	78134	69	4520964	21855750	69	5
NOR_Tryc_subflye_sample02	tryc	subflye	sample02	NOR	flye	sub	tryc_subflye_sample02_contig2367	contig2367	NA	NA	NA	root (UID1)	5656	56	24	56	0	0	0	0	0	0	0	0	9651	69	4520964	21855750	69	5
NOR_Tryc_subflye_sample02	tryc	subflye	sample02	NOR	flye	sub	tryc_subflye_sample02_contig262	contig262	NA	NA	NA	root (UID1)	5656	56	24	56	0	0	0	0	0	0	0	0	44233	69	4520964	21855750	69	5
NOR_Tryc_subflye_sample02	tryc	subflye	sample02	NOR	flye	sub	tryc_subflye_sample02_contig264	contig264	NA	NA	NA	root (UID1)	5656	56	24	56	0	0	0	0	0	0	0	0	2953	69	4520964	21855750	69	5
NOR_Tryc_subflye_sample02	tryc	subflye	sample02	NOR	flye	sub	tryc_subflye_sample02_contig307	contig307	NA	NA	NA	root (UID1)	5656	56	24	56	0	0	0	0	0	0	0	0	120228	69	4520964	21855750	69	5
NOR_Tryc_subflye_sample02	tryc	subflye	sample02	NOR	flye	sub	tryc_subflye_sample02_contig329	contig329	NA	NA	NA	root (UID1)	5656	56	24	56	0	0	0	0	0	0	0	0	43107	69	4520964	21855750	69	5
NOR_Tryc_subflye_sample02	tryc	subflye	sample02	NOR	flye	sub	tryc_subflye_sample02_contig373	contig373	NA	NA	NA	root (UID1)	5656	56	24	56	0	0	0	0	0	0	0	0	4944	69	4520964	21855750	69	5
NOR_Tryc_subflye_sample02	tryc	subflye	sample02	NOR	flye	sub	tryc_subflye_sample02_contig408	contig408	d__Bacteria;p__Bacteroidota	d__Bacteria	p__Bacteroidota	o__Cytophagales (UID2936)	47	454	336	72	376	5	1	0	0	82.61	1.79	0	4115259	69	4520964	21855750	69	5
NOR_Tryc_subflye_sample02	tryc	subflye	sample02	NOR	flye	sub	tryc_subflye_sample02_contig414	contig414	NA	NA	NA	root (UID1)	5656	56	24	56	0	0	0	0	0	0	0	0	1983	69	4520964	21855750	69	5
NOR_Tryc_subflye_sample02	tryc	subflye	sample02	NOR	flye	sub	tryc_subflye_sample02_contig508	contig508	NA	NA	NA	root (UID1)	5656	56	24	56	0	0	0	0	0	0	0	0	4331	69	4520964	21855750	69	5
NOR_Tryc_subflye_sample02	tryc	subflye	sample02	NOR	flye	sub	tryc_subflye_sample02_contig51	contig51	NA	NA	NA	root (UID1)	5656	56	24	56	0	0	0	0	0	0	0	0	196945	69	4520964	21855750	69	5
NOR_Tryc_subflye_sample02	tryc	subflye	sample02	NOR	flye	sub	tryc_subflye_sample02_contig625	contig625	NA	NA	NA	root (UID1)	5656	56	24	56	0	0	0	0	0	0	0	0	5356	69	4520964	21855750	69	5
NOR_Tryc_subflye_sample02	tryc	subflye	sample02	NOR	flye	sub	tryc_subflye_sample02_contig626	contig626	NA	NA	NA	root (UID1)	5656	56	24	56	0	0	0	0	0	0	0	0	5363	69	4520964	21855750	69	5
NOR_Tryc_subflye_sample02	tryc	subflye	sample02	NOR	flye	sub	tryc_subflye_sample02_contig632	contig632	NA	NA	NA	root (UID1)	5656	56	24	56	0	0	0	0	0	0	0	0	6429	69	4520964	21855750	69	5
NOR_Tryc_subflye_sample02	tryc	subflye	sample02	NOR	flye	sub	tryc_subflye_sample02_contig650	contig650	NA	NA	NA	root (UID1)	5656	56	24	56	0	0	0	0	0	0	0	0	27343	69	4520964	21855750	69	5
NOR_Tryc_subflye_sample02	tryc	subflye	sample02	NOR	flye	sub	tryc_subflye_sample02_contig658	contig658	NA	NA	NA	root (UID1)	5656	56	24	56	0	0	0	0	0	0	0	0	4502	69	4520964	21855750	69	5
NOR_Tryc_subflye_sample02	tryc	subflye	sample02	NOR	flye	sub	tryc_subflye_sample02_contig70	contig70	d__Bacteria;p__Nitrospirota	d__Bacteria	p__Nitrospirota	k__Bacteria (UID3187)	2258	181	110	41	138	2	0	0	0	72.32	1.82	0	4106168	69	4520964	21855750	69	5
NOR_Tryc_subflye_sample02	tryc	subflye	sample02	NOR	flye	sub	tryc_subflye_sample02_contig81	contig81	d__Bacteria;p__Proteobacteria	d__Bacteria	p__Proteobacteria	f__Rhodobacteraceae (UID3340)	84	568	330	366	202	0	0	0	0	35.82	0	0	3775828	69	4520964	21855750	69	5
NOR_Tryc_subflye_sample02	tryc	subflye	sample02	NOR	flye	sub	tryc_subflye_sample02_contig825	contig825	NA	NA	NA	root (UID1)	5656	56	24	56	0	0	0	0	0	0	0	0	2892	69	4520964	21855750	69	5
NOR_Tryc_subflye_sample02	tryc	subflye	sample02	NOR	flye	sub	tryc_subflye_sample02_contig860	contig860	NA	NA	NA	root (UID1)	5656	56	24	56	0	0	0	0	0	0	0	0	1297	69	4520964	21855750	69	5
NOR_Tryc_subflye_sample02	tryc	subflye	sample02	NOR	flye	sub	tryc_subflye_sample02_contig882	contig882	NA	NA	NA	root (UID1)	5656	56	24	56	0	0	0	0	0	0	0	0	11709	69	4520964	21855750	69	5
NOR_Tryc_subflye_sample02	tryc	subflye	sample02	NOR	flye	sub	tryc_subflye_sample02_contig898	contig898	NA	NA	NA	root (UID1)	5656	56	24	56	0	0	0	0	0	0	0	0	3718	69	4520964	21855750	69	5
NOR_Tryc_subflye_sample02	tryc	subflye	sample02	NOR	flye	sub	tryc_subflye_sample02_contig900	contig900	NA	NA	NA	root (UID1)	5656	56	24	56	0	0	0	0	0	0	0	0	5899	69	4520964	21855750	69	5
NOR_Tryc_subflye_sample02	tryc	subflye	sample02	NOR	flye	sub	tryc_subflye_sample02_contig911	contig911	NA	NA	NA	root (UID1)	5656	56	24	56	0	0	0	0	0	0	0	0	12971	69	4520964	21855750	69	5
NOR_Tryc_subflye_sample02	tryc	subflye	sample02	NOR	flye	sub	tryc_subflye_sample02_contig912	contig912	NA	NA	NA	root (UID1)	5656	56	24	56	0	0	0	0	0	0	0	0	40479	69	4520964	21855750	69	5
NOR_Tryc_subflye_sample02	tryc	subflye	sample02	NOR	flye	sub	tryc_subflye_sample02_contig940	contig940	NA	NA	NA	root (UID1)	5656	56	24	56	0	0	0	0	0	0	0	0	31240	69	4520964	21855750	69	5
NOR_Tryc_subflye_sample02	tryc	subflye	sample02	NOR	flye	sub	tryc_subflye_sample02_contig950	contig950	NA	NA	NA	root (UID1)	5656	56	24	56	0	0	0	0	0	0	0	0	6712	69	4520964	21855750	69	5
NOR_Tryc_subflye_sample02	tryc	subflye	sample02	NOR	flye	sub	tryc_subflye_sample02_contig99	contig99	NA	NA	NA	root (UID1)	5656	56	24	56	0	0	0	0	0	0	0	0	2589	69	4520964	21855750	69	5
NOR_Tryc_subflye_sample03	tryc	subflye	sample03	NOR	flye	sub	tryc_subflye_sample03_contig1012	contig1012	NA	NA	NA	root (UID1)	5656	56	24	56	0	0	0	0	0	0	0	0	139209	71	5210693	25827282	71	6
NOR_Tryc_subflye_sample03	tryc	subflye	sample03	NOR	flye	sub	tryc_subflye_sample03_contig102	contig102	NA	NA	NA	root (UID1)	5656	56	24	56	0	0	0	0	0	0	0	0	21075	71	5210693	25827282	71	6
NOR_Tryc_subflye_sample03	tryc	subflye	sample03	NOR	flye	sub	tryc_subflye_sample03_contig1032	contig1032	NA	NA	NA	root (UID1)	5656	56	24	56	0	0	0	0	0	0	0	0	7395	71	5210693	25827282	71	6
NOR_Tryc_subflye_sample03	tryc	subflye	sample03	NOR	flye	sub	tryc_subflye_sample03_contig1092	contig1092	NA	NA	NA	root (UID1)	5656	56	24	56	0	0	0	0	0	0	0	0	6575	71	5210693	25827282	71	6
NOR_Tryc_subflye_sample03	tryc	subflye	sample03	NOR	flye	sub	tryc_subflye_sample03_contig1116	contig1116	NA	NA	NA	root (UID1)	5656	56	24	56	0	0	0	0	0	0	0	0	11945	71	5210693	25827282	71	6
NOR_Tryc_subflye_sample03	tryc	subflye	sample03	NOR	flye	sub	tryc_subflye_sample03_contig1138	contig1138	NA	NA	NA	root (UID1)	5656	56	24	56	0	0	0	0	0	0	0	0	4957	71	5210693	25827282	71	6
NOR_Tryc_subflye_sample03	tryc	subflye	sample03	NOR	flye	sub	tryc_subflye_sample03_contig1143	contig1143	NA	NA	NA	root (UID1)	5656	56	24	56	0	0	0	0	0	0	0	0	7838	71	5210693	25827282	71	6
NOR_Tryc_subflye_sample03	tryc	subflye	sample03	NOR	flye	sub	tryc_subflye_sample03_contig12	contig12	d__Bacteria;p__Actinobacteriota	d__Bacteria	p__Actinobacteriota	g__Mycobacterium (UID1816)	100	693	300	101	590	2	0	0	0	85.2	0.67	0	5210693	71	5210693	25827282	71	6
NOR_Tryc_subflye_sample03	tryc	subflye	sample03	NOR	flye	sub	tryc_subflye_sample03_contig1220	contig1220	NA	NA	NA	root (UID1)	5656	56	24	56	0	0	0	0	0	0	0	0	2896	71	5210693	25827282	71	6
NOR_Tryc_subflye_sample03	tryc	subflye	sample03	NOR	flye	sub	tryc_subflye_sample03_contig1236	contig1236	NA	NA	NA	root (UID1)	5656	56	24	56	0	0	0	0	0	0	0	0	1172	71	5210693	25827282	71	6
NOR_Tryc_subflye_sample03	tryc	subflye	sample03	NOR	flye	sub	tryc_subflye_sample03_contig1245	contig1245	NA	NA	NA	root (UID1)	5656	56	24	56	0	0	0	0	0	0	0	0	9820	71	5210693	25827282	71	6
NOR_Tryc_subflye_sample03	tryc	subflye	sample03	NOR	flye	sub	tryc_subflye_sample03_contig1308	contig1308	NA	NA	NA	root (UID1)	5656	56	24	56	0	0	0	0	0	0	0	0	533	71	5210693	25827282	71	6
NOR_Tryc_subflye_sample03	tryc	subflye	sample03	NOR	flye	sub	tryc_subflye_sample03_contig1322	contig1322	NA	NA	NA	root (UID1)	5656	56	24	56	0	0	0	0	0	0	0	0	5813	71	5210693	25827282	71	6
NOR_Tryc_subflye_sample03	tryc	subflye	sample03	NOR	flye	sub	tryc_subflye_sample03_contig133	contig133	NA	NA	NA	root (UID1)	5656	56	24	56	0	0	0	0	0	0	0	0	196736	71	5210693	25827282	71	6
NOR_Tryc_subflye_sample03	tryc	subflye	sample03	NOR	flye	sub	tryc_subflye_sample03_contig139	contig139	d__Bacteria;p__Nitrospirota	d__Bacteria	p__Nitrospirota	k__Bacteria (UID3187)	2258	181	110	43	136	2	0	0	0	71.36	1.82	0	4106165	71	5210693	25827282	71	6
NOR_Tryc_subflye_sample03	tryc	subflye	sample03	NOR	flye	sub	tryc_subflye_sample03_contig1459	contig1459	NA	NA	NA	root (UID1)	5656	56	24	56	0	0	0	0	0	0	0	0	120224	71	5210693	25827282	71	6
NOR_Tryc_subflye_sample03	tryc	subflye	sample03	NOR	flye	sub	tryc_subflye_sample03_contig149	contig149	d__Bacteria;p__Proteobacteria	d__Bacteria	p__Proteobacteria	c__Gammaproteobacteria (UID4201)	1164	275	174	46	229	0	0	0	0	80.64	0	0	2639438	71	5210693	25827282	71	6
NOR_Tryc_subflye_sample03	tryc	subflye	sample03	NOR	flye	sub	tryc_subflye_sample03_contig1588	contig1588	NA	NA	NA	root (UID1)	5656	56	24	56	0	0	0	0	0	0	0	0	6271	71	5210693	25827282	71	6
NOR_Tryc_subflye_sample03	tryc	subflye	sample03	NOR	flye	sub	tryc_subflye_sample03_contig1591	contig1591	NA	NA	NA	root (UID1)	5656	56	24	56	0	0	0	0	0	0	0	0	3205	71	5210693	25827282	71	6
NOR_Tryc_subflye_sample03	tryc	subflye	sample03	NOR	flye	sub	tryc_subflye_sample03_contig1602	contig1602	NA	NA	NA	root (UID1)	5656	56	24	56	0	0	0	0	0	0	0	0	84114	71	5210693	25827282	71	6
NOR_Tryc_subflye_sample03	tryc	subflye	sample03	NOR	flye	sub	tryc_subflye_sample03_contig1698	contig1698	NA	NA	NA	root (UID1)	5656	56	24	56	0	0	0	0	0	0	0	0	3449	71	5210693	25827282	71	6
NOR_Tryc_subflye_sample03	tryc	subflye	sample03	NOR	flye	sub	tryc_subflye_sample03_contig1710	contig1710	NA	NA	NA	root (UID1)	5656	56	24	56	0	0	0	0	0	0	0	0	1994	71	5210693	25827282	71	6
NOR_Tryc_subflye_sample03	tryc	subflye	sample03	NOR	flye	sub	tryc_subflye_sample03_contig1765	contig1765	NA	NA	NA	root (UID1)	5656	56	24	56	0	0	0	0	0	0	0	0	6595	71	5210693	25827282	71	6
NOR_Tryc_subflye_sample03	tryc	subflye	sample03	NOR	flye	sub	tryc_subflye_sample03_contig1880	contig1880	NA	NA	NA	root (UID1)	5656	56	24	56	0	0	0	0	0	0	0	0	3080	71	5210693	25827282	71	6
NOR_Tryc_subflye_sample03	tryc	subflye	sample03	NOR	flye	sub	tryc_subflye_sample03_contig1920	contig1920	NA	NA	NA	root (UID1)	5656	56	24	56	0	0	0	0	0	0	0	0	12973	71	5210693	25827282	71	6
NOR_Tryc_subflye_sample03	tryc	subflye	sample03	NOR	flye	sub	tryc_subflye_sample03_contig1921	contig1921	NA	NA	NA	root (UID1)	5656	56	24	56	0	0	0	0	0	0	0	0	5052	71	5210693	25827282	71	6
NOR_Tryc_subflye_sample03	tryc	subflye	sample03	NOR	flye	sub	tryc_subflye_sample03_contig2029	contig2029	NA	NA	NA	root (UID1)	5656	56	24	56	0	0	0	0	0	0	0	0	2819	71	5210693	25827282	71	6
NOR_Tryc_subflye_sample03	tryc	subflye	sample03	NOR	flye	sub	tryc_subflye_sample03_contig2227	contig2227	NA	NA	NA	root (UID1)	5656	56	24	56	0	0	0	0	0	0	0	0	2996	71	5210693	25827282	71	6
NOR_Tryc_subflye_sample03	tryc	subflye	sample03	NOR	flye	sub	tryc_subflye_sample03_contig2248	contig2248	NA	NA	NA	root (UID1)	5656	56	24	56	0	0	0	0	0	0	0	0	15676	71	5210693	25827282	71	6
NOR_Tryc_subflye_sample03	tryc	subflye	sample03	NOR	flye	sub	tryc_subflye_sample03_contig2264	contig2264	NA	NA	NA	root (UID1)	5656	56	24	56	0	0	0	0	0	0	0	0	2092	71	5210693	25827282	71	6
NOR_Tryc_subflye_sample03	tryc	subflye	sample03	NOR	flye	sub	tryc_subflye_sample03_contig2267	contig2267	NA	NA	NA	root (UID1)	5656	56	24	56	0	0	0	0	0	0	0	0	19299	71	5210693	25827282	71	6
NOR_Tryc_subflye_sample03	tryc	subflye	sample03	NOR	flye	sub	tryc_subflye_sample03_contig2270	contig2270	NA	NA	NA	root (UID1)	5656	56	24	56	0	0	0	0	0	0	0	0	20972	71	5210693	25827282	71	6
NOR_Tryc_subflye_sample03	tryc	subflye	sample03	NOR	flye	sub	tryc_subflye_sample03_contig2293	contig2293	NA	NA	NA	root (UID1)	5656	56	24	56	0	0	0	0	0	0	0	0	17460	71	5210693	25827282	71	6
NOR_Tryc_subflye_sample03	tryc	subflye	sample03	NOR	flye	sub	tryc_subflye_sample03_contig2312	contig2312	NA	NA	NA	root (UID1)	5656	56	24	56	0	0	0	0	0	0	0	0	19284	71	5210693	25827282	71	6
NOR_Tryc_subflye_sample03	tryc	subflye	sample03	NOR	flye	sub	tryc_subflye_sample03_contig2319	contig2319	NA	NA	NA	root (UID1)	5656	56	24	56	0	0	0	0	0	0	0	0	17597	71	5210693	25827282	71	6
NOR_Tryc_subflye_sample03	tryc	subflye	sample03	NOR	flye	sub	tryc_subflye_sample03_contig2324	contig2324	NA	NA	NA	root (UID1)	5656	56	24	56	0	0	0	0	0	0	0	0	17352	71	5210693	25827282	71	6
NOR_Tryc_subflye_sample03	tryc	subflye	sample03	NOR	flye	sub	tryc_subflye_sample03_contig2325	contig2325	NA	NA	NA	root (UID1)	5656	56	24	56	0	0	0	0	0	0	0	0	19741	71	5210693	25827282	71	6
NOR_Tryc_subflye_sample03	tryc	subflye	sample03	NOR	flye	sub	tryc_subflye_sample03_contig2338	contig2338	NA	NA	NA	root (UID1)	5656	56	24	56	0	0	0	0	0	0	0	0	25487	71	5210693	25827282	71	6
NOR_Tryc_subflye_sample03	tryc	subflye	sample03	NOR	flye	sub	tryc_subflye_sample03_contig2340	contig2340	NA	NA	NA	root (UID1)	5656	56	24	56	0	0	0	0	0	0	0	0	36255	71	5210693	25827282	71	6
NOR_Tryc_subflye_sample03	tryc	subflye	sample03	NOR	flye	sub	tryc_subflye_sample03_contig2342	contig2342	NA	NA	NA	root (UID1)	5656	56	24	56	0	0	0	0	0	0	0	0	6246	71	5210693	25827282	71	6
NOR_Tryc_subflye_sample03	tryc	subflye	sample03	NOR	flye	sub	tryc_subflye_sample03_contig2344	contig2344	NA	NA	NA	root (UID1)	5656	56	24	56	0	0	0	0	0	0	0	0	5364	71	5210693	25827282	71	6
NOR_Tryc_subflye_sample03	tryc	subflye	sample03	NOR	flye	sub	tryc_subflye_sample03_contig2346	contig2346	NA	NA	NA	root (UID1)	5656	56	24	56	0	0	0	0	0	0	0	0	5550	71	5210693	25827282	71	6
NOR_Tryc_subflye_sample03	tryc	subflye	sample03	NOR	flye	sub	tryc_subflye_sample03_contig2347	contig2347	NA	NA	NA	root (UID1)	5656	56	24	56	0	0	0	0	0	0	0	0	78127	71	5210693	25827282	71	6
NOR_Tryc_subflye_sample03	tryc	subflye	sample03	NOR	flye	sub	tryc_subflye_sample03_contig235	contig235	NA	NA	NA	root (UID1)	5656	56	24	56	0	0	0	0	0	0	0	0	115291	71	5210693	25827282	71	6
NOR_Tryc_subflye_sample03	tryc	subflye	sample03	NOR	flye	sub	tryc_subflye_sample03_contig2350	contig2350	NA	NA	NA	root (UID1)	5656	56	24	56	0	0	0	0	0	0	0	0	17734	71	5210693	25827282	71	6
NOR_Tryc_subflye_sample03	tryc	subflye	sample03	NOR	flye	sub	tryc_subflye_sample03_contig2351	contig2351	NA	NA	NA	root (UID1)	5656	56	24	56	0	0	0	0	0	0	0	0	20242	71	5210693	25827282	71	6
NOR_Tryc_subflye_sample03	tryc	subflye	sample03	NOR	flye	sub	tryc_subflye_sample03_contig2355	contig2355	NA	NA	NA	root (UID1)	5656	56	24	56	0	0	0	0	0	0	0	0	22077	71	5210693	25827282	71	6
NOR_Tryc_subflye_sample03	tryc	subflye	sample03	NOR	flye	sub	tryc_subflye_sample03_contig2357	contig2357	NA	NA	NA	k__Bacteria (UID203)	5449	104	58	100	4	0	0	0	0	1.75	0	0	41460	71	5210693	25827282	71	6
NOR_Tryc_subflye_sample03	tryc	subflye	sample03	NOR	flye	sub	tryc_subflye_sample03_contig285	contig285	NA	NA	NA	root (UID1)	5656	56	24	56	0	0	0	0	0	0	0	0	1689	71	5210693	25827282	71	6
NOR_Tryc_subflye_sample03	tryc	subflye	sample03	NOR	flye	sub	tryc_subflye_sample03_contig286	contig286	NA	NA	NA	root (UID1)	5656	56	24	56	0	0	0	0	0	0	0	0	4360	71	5210693	25827282	71	6
NOR_Tryc_subflye_sample03	tryc	subflye	sample03	NOR	flye	sub	tryc_subflye_sample03_contig344	contig344	d__Bacteria;p__Proteobacteria	d__Bacteria	p__Proteobacteria	f__Rhodobacteraceae (UID3340)	84	568	330	338	230	0	0	0	0	40.11	0	0	3775809	71	5210693	25827282	71	6
NOR_Tryc_subflye_sample03	tryc	subflye	sample03	NOR	flye	sub	tryc_subflye_sample03_contig37	contig37	NA	NA	NA	root (UID1)	5656	56	24	56	0	0	0	0	0	0	0	0	3655	71	5210693	25827282	71	6
NOR_Tryc_subflye_sample03	tryc	subflye	sample03	NOR	flye	sub	tryc_subflye_sample03_contig48	contig48	d__Bacteria;p__Bacteroidota	d__Bacteria	p__Bacteroidota	o__Cytophagales (UID2936)	47	454	336	97	354	3	0	0	0	76.48	0.69	0	4520934	71	5210693	25827282	71	6
NOR_Tryc_subflye_sample03	tryc	subflye	sample03	NOR	flye	sub	tryc_subflye_sample03_contig559	contig559	NA	NA	NA	root (UID1)	5656	56	24	56	0	0	0	0	0	0	0	0	31292	71	5210693	25827282	71	6
NOR_Tryc_subflye_sample03	tryc	subflye	sample03	NOR	flye	sub	tryc_subflye_sample03_contig573	contig573	NA	NA	NA	root (UID1)	5656	56	24	56	0	0	0	0	0	0	0	0	5709	71	5210693	25827282	71	6
NOR_Tryc_subflye_sample03	tryc	subflye	sample03	NOR	flye	sub	tryc_subflye_sample03_contig582	contig582	NA	NA	NA	root (UID1)	5656	56	24	56	0	0	0	0	0	0	0	0	3695	71	5210693	25827282	71	6
NOR_Tryc_subflye_sample03	tryc	subflye	sample03	NOR	flye	sub	tryc_subflye_sample03_contig600	contig600	NA	NA	NA	root (UID1)	5656	56	24	56	0	0	0	0	0	0	0	0	57990	71	5210693	25827282	71	6
NOR_Tryc_subflye_sample03	tryc	subflye	sample03	NOR	flye	sub	tryc_subflye_sample03_contig603	contig603	NA	NA	NA	root (UID1)	5656	56	24	56	0	0	0	0	0	0	0	0	9173	71	5210693	25827282	71	6
NOR_Tryc_subflye_sample03	tryc	subflye	sample03	NOR	flye	sub	tryc_subflye_sample03_contig622	contig622	NA	NA	NA	root (UID1)	5656	56	24	56	0	0	0	0	0	0	0	0	4547	71	5210693	25827282	71	6
NOR_Tryc_subflye_sample03	tryc	subflye	sample03	NOR	flye	sub	tryc_subflye_sample03_contig651	contig651	NA	NA	NA	root (UID1)	5656	56	24	56	0	0	0	0	0	0	0	0	8342	71	5210693	25827282	71	6
NOR_Tryc_subflye_sample03	tryc	subflye	sample03	NOR	flye	sub	tryc_subflye_sample03_contig660	contig660	NA	NA	NA	root (UID1)	5656	56	24	56	0	0	0	0	0	0	0	0	2907	71	5210693	25827282	71	6
NOR_Tryc_subflye_sample03	tryc	subflye	sample03	NOR	flye	sub	tryc_subflye_sample03_contig69	contig69	d__Bacteria;p__Bacteroidota	d__Bacteria	p__Bacteroidota	o__Cytophagales (UID2936)	47	454	336	73	377	4	0	0	0	82.2	0.89	0	4115276	71	5210693	25827282	71	6
NOR_Tryc_subflye_sample03	tryc	subflye	sample03	NOR	flye	sub	tryc_subflye_sample03_contig713	contig713	NA	NA	NA	root (UID1)	5656	56	24	56	0	0	0	0	0	0	0	0	5905	71	5210693	25827282	71	6
NOR_Tryc_subflye_sample03	tryc	subflye	sample03	NOR	flye	sub	tryc_subflye_sample03_contig734	contig734	NA	NA	NA	root (UID1)	5656	56	24	56	0	0	0	0	0	0	0	0	43108	71	5210693	25827282	71	6
NOR_Tryc_subflye_sample03	tryc	subflye	sample03	NOR	flye	sub	tryc_subflye_sample03_contig83	contig83	NA	NA	NA	root (UID1)	5656	56	24	56	0	0	0	0	0	0	0	0	4933	71	5210693	25827282	71	6
NOR_Tryc_subflye_sample03	tryc	subflye	sample03	NOR	flye	sub	tryc_subflye_sample03_contig838	contig838	NA	NA	NA	root (UID1)	5656	56	24	56	0	0	0	0	0	0	0	0	874	71	5210693	25827282	71	6
NOR_Tryc_subflye_sample03	tryc	subflye	sample03	NOR	flye	sub	tryc_subflye_sample03_contig889	contig889	NA	NA	NA	root (UID1)	5656	56	24	56	0	0	0	0	0	0	0	0	21027	71	5210693	25827282	71	6
NOR_Tryc_subflye_sample03	tryc	subflye	sample03	NOR	flye	sub	tryc_subflye_sample03_contig898	contig898	NA	NA	NA	root (UID1)	5656	56	24	56	0	0	0	0	0	0	0	0	650	71	5210693	25827282	71	6
NOR_Tryc_subflye_sample03	tryc	subflye	sample03	NOR	flye	sub	tryc_subflye_sample03_contig976	contig976	NA	NA	NA	root (UID1)	5656	56	24	56	0	0	0	0	0	0	0	0	8826	71	5210693	25827282	71	6
NOR_Tryc_subflye_sample03	tryc	subflye	sample03	NOR	flye	sub	tryc_subflye_sample03_contig984	contig984	NA	NA	NA	root (UID1)	5656	56	24	56	0	0	0	0	0	0	0	0	32187	71	5210693	25827282	71	6
NOR_Tryc_subflye_sample03	tryc	subflye	sample03	NOR	flye	sub	tryc_subflye_sample03_contig995	contig995	NA	NA	NA	root (UID1)	5656	56	24	56	0	0	0	0	0	0	0	0	16056	71	5210693	25827282	71	6
NOR_Tryc_subflye_sample04	tryc	subflye	sample04	NOR	flye	sub	tryc_subflye_sample04_contig1117	contig1117	NA	NA	NA	root (UID1)	5656	56	24	56	0	0	0	0	0	0	0	0	31694	68	4520850	19282583	68	5
NOR_Tryc_subflye_sample04	tryc	subflye	sample04	NOR	flye	sub	tryc_subflye_sample04_contig1119	contig1119	NA	NA	NA	root (UID1)	5656	56	24	56	0	0	0	0	0	0	0	0	14527	68	4520850	19282583	68	5
NOR_Tryc_subflye_sample04	tryc	subflye	sample04	NOR	flye	sub	tryc_subflye_sample04_contig1141	contig1141	NA	NA	NA	root (UID1)	5656	56	24	56	0	0	0	0	0	0	0	0	21050	68	4520850	19282583	68	5
NOR_Tryc_subflye_sample04	tryc	subflye	sample04	NOR	flye	sub	tryc_subflye_sample04_contig1177	contig1177	NA	NA	NA	root (UID1)	5656	56	24	56	0	0	0	0	0	0	0	0	1683	68	4520850	19282583	68	5
NOR_Tryc_subflye_sample04	tryc	subflye	sample04	NOR	flye	sub	tryc_subflye_sample04_contig139	contig139	NA	NA	NA	root (UID1)	5656	56	24	56	0	0	0	0	0	0	0	0	37469	68	4520850	19282583	68	5
NOR_Tryc_subflye_sample04	tryc	subflye	sample04	NOR	flye	sub	tryc_subflye_sample04_contig1491	contig1491	NA	NA	NA	root (UID1)	5656	56	24	56	0	0	0	0	0	0	0	0	5172	68	4520850	19282583	68	5
NOR_Tryc_subflye_sample04	tryc	subflye	sample04	NOR	flye	sub	tryc_subflye_sample04_contig1493	contig1493	NA	NA	NA	root (UID1)	5656	56	24	56	0	0	0	0	0	0	0	0	4904	68	4520850	19282583	68	5
NOR_Tryc_subflye_sample04	tryc	subflye	sample04	NOR	flye	sub	tryc_subflye_sample04_contig1569	contig1569	NA	NA	NA	root (UID1)	5656	56	24	56	0	0	0	0	0	0	0	0	1942	68	4520850	19282583	68	5
NOR_Tryc_subflye_sample04	tryc	subflye	sample04	NOR	flye	sub	tryc_subflye_sample04_contig1603	contig1603	NA	NA	NA	root (UID1)	5656	56	24	56	0	0	0	0	0	0	0	0	690	68	4520850	19282583	68	5
NOR_Tryc_subflye_sample04	tryc	subflye	sample04	NOR	flye	sub	tryc_subflye_sample04_contig1687	contig1687	NA	NA	NA	root (UID1)	5656	56	24	56	0	0	0	0	0	0	0	0	1995	68	4520850	19282583	68	5
NOR_Tryc_subflye_sample04	tryc	subflye	sample04	NOR	flye	sub	tryc_subflye_sample04_contig1726	contig1726	NA	NA	NA	root (UID1)	5656	56	24	56	0	0	0	0	0	0	0	0	8812	68	4520850	19282583	68	5
NOR_Tryc_subflye_sample04	tryc	subflye	sample04	NOR	flye	sub	tryc_subflye_sample04_contig1742	contig1742	NA	NA	NA	root (UID1)	5656	56	24	56	0	0	0	0	0	0	0	0	5366	68	4520850	19282583	68	5
NOR_Tryc_subflye_sample04	tryc	subflye	sample04	NOR	flye	sub	tryc_subflye_sample04_contig1743	contig1743	NA	NA	NA	root (UID1)	5656	56	24	56	0	0	0	0	0	0	0	0	740	68	4520850	19282583	68	5
NOR_Tryc_subflye_sample04	tryc	subflye	sample04	NOR	flye	sub	tryc_subflye_sample04_contig1751	contig1751	NA	NA	NA	root (UID1)	5656	56	24	56	0	0	0	0	0	0	0	0	44251	68	4520850	19282583	68	5
NOR_Tryc_subflye_sample04	tryc	subflye	sample04	NOR	flye	sub	tryc_subflye_sample04_contig1762	contig1762	NA	NA	NA	root (UID1)	5656	56	24	56	0	0	0	0	0	0	0	0	3788	68	4520850	19282583	68	5
NOR_Tryc_subflye_sample04	tryc	subflye	sample04	NOR	flye	sub	tryc_subflye_sample04_contig1854	contig1854	NA	NA	NA	root (UID1)	5656	56	24	56	0	0	0	0	0	0	0	0	4102	68	4520850	19282583	68	5
NOR_Tryc_subflye_sample04	tryc	subflye	sample04	NOR	flye	sub	tryc_subflye_sample04_contig1894	contig1894	NA	NA	NA	root (UID1)	5656	56	24	56	0	0	0	0	0	0	0	0	8835	68	4520850	19282583	68	5
NOR_Tryc_subflye_sample04	tryc	subflye	sample04	NOR	flye	sub	tryc_subflye_sample04_contig1901	contig1901	NA	NA	NA	root (UID1)	5656	56	24	56	0	0	0	0	0	0	0	0	4043	68	4520850	19282583	68	5
NOR_Tryc_subflye_sample04	tryc	subflye	sample04	NOR	flye	sub	tryc_subflye_sample04_contig1976	contig1976	NA	NA	NA	root (UID1)	5656	56	24	56	0	0	0	0	0	0	0	0	6639	68	4520850	19282583	68	5
NOR_Tryc_subflye_sample04	tryc	subflye	sample04	NOR	flye	sub	tryc_subflye_sample04_contig2	contig2	d__Bacteria;p__Proteobacteria	d__Bacteria	p__Proteobacteria	c__Gammaproteobacteria (UID4201)	1164	275	174	50	225	0	0	0	0	79.21	0	0	2641607	68	4520850	19282583	68	5
NOR_Tryc_subflye_sample04	tryc	subflye	sample04	NOR	flye	sub	tryc_subflye_sample04_contig2004	contig2004	NA	NA	NA	root (UID1)	5656	56	24	56	0	0	0	0	0	0	0	0	4354	68	4520850	19282583	68	5
NOR_Tryc_subflye_sample04	tryc	subflye	sample04	NOR	flye	sub	tryc_subflye_sample04_contig2023	contig2023	NA	NA	NA	root (UID1)	5656	56	24	56	0	0	0	0	0	0	0	0	2737	68	4520850	19282583	68	5
NOR_Tryc_subflye_sample04	tryc	subflye	sample04	NOR	flye	sub	tryc_subflye_sample04_contig2081	contig2081	NA	NA	NA	root (UID1)	5656	56	24	56	0	0	0	0	0	0	0	0	5053	68	4520850	19282583	68	5
NOR_Tryc_subflye_sample04	tryc	subflye	sample04	NOR	flye	sub	tryc_subflye_sample04_contig2114	contig2114	NA	NA	NA	root (UID1)	5656	56	24	56	0	0	0	0	0	0	0	0	16923	68	4520850	19282583	68	5
NOR_Tryc_subflye_sample04	tryc	subflye	sample04	NOR	flye	sub	tryc_subflye_sample04_contig2136	contig2136	NA	NA	NA	root (UID1)	5656	56	24	56	0	0	0	0	0	0	0	0	19296	68	4520850	19282583	68	5
NOR_Tryc_subflye_sample04	tryc	subflye	sample04	NOR	flye	sub	tryc_subflye_sample04_contig2182	contig2182	NA	NA	NA	root (UID1)	5656	56	24	56	0	0	0	0	0	0	0	0	9717	68	4520850	19282583	68	5
NOR_Tryc_subflye_sample04	tryc	subflye	sample04	NOR	flye	sub	tryc_subflye_sample04_contig2257	contig2257	NA	NA	NA	root (UID1)	5656	56	24	56	0	0	0	0	0	0	0	0	7830	68	4520850	19282583	68	5
NOR_Tryc_subflye_sample04	tryc	subflye	sample04	NOR	flye	sub	tryc_subflye_sample04_contig2266	contig2266	NA	NA	NA	root (UID1)	5656	56	24	56	0	0	0	0	0	0	0	0	57992	68	4520850	19282583	68	5
NOR_Tryc_subflye_sample04	tryc	subflye	sample04	NOR	flye	sub	tryc_subflye_sample04_contig2274	contig2274	NA	NA	NA	root (UID1)	5656	56	24	56	0	0	0	0	0	0	0	0	36256	68	4520850	19282583	68	5
NOR_Tryc_subflye_sample04	tryc	subflye	sample04	NOR	flye	sub	tryc_subflye_sample04_contig2277	contig2277	NA	NA	NA	root (UID1)	5656	56	24	56	0	0	0	0	0	0	0	0	25438	68	4520850	19282583	68	5
NOR_Tryc_subflye_sample04	tryc	subflye	sample04	NOR	flye	sub	tryc_subflye_sample04_contig2299	contig2299	NA	NA	NA	root (UID1)	5656	56	24	56	0	0	0	0	0	0	0	0	2983	68	4520850	19282583	68	5
NOR_Tryc_subflye_sample04	tryc	subflye	sample04	NOR	flye	sub	tryc_subflye_sample04_contig2332	contig2332	NA	NA	NA	root (UID1)	5656	56	24	56	0	0	0	0	0	0	0	0	21053	68	4520850	19282583	68	5
NOR_Tryc_subflye_sample04	tryc	subflye	sample04	NOR	flye	sub	tryc_subflye_sample04_contig2336	contig2336	NA	NA	NA	root (UID1)	5656	56	24	56	0	0	0	0	0	0	0	0	1957	68	4520850	19282583	68	5
NOR_Tryc_subflye_sample04	tryc	subflye	sample04	NOR	flye	sub	tryc_subflye_sample04_contig2337	contig2337	NA	NA	NA	root (UID1)	5656	56	24	56	0	0	0	0	0	0	0	0	5800	68	4520850	19282583	68	5
NOR_Tryc_subflye_sample04	tryc	subflye	sample04	NOR	flye	sub	tryc_subflye_sample04_contig2343	contig2343	NA	NA	NA	root (UID1)	5656	56	24	56	0	0	0	0	0	0	0	0	17556	68	4520850	19282583	68	5
NOR_Tryc_subflye_sample04	tryc	subflye	sample04	NOR	flye	sub	tryc_subflye_sample04_contig2346	contig2346	NA	NA	NA	root (UID1)	5656	56	24	56	0	0	0	0	0	0	0	0	2003	68	4520850	19282583	68	5
NOR_Tryc_subflye_sample04	tryc	subflye	sample04	NOR	flye	sub	tryc_subflye_sample04_contig2349	contig2349	NA	NA	NA	root (UID1)	5656	56	24	56	0	0	0	0	0	0	0	0	1882	68	4520850	19282583	68	5
NOR_Tryc_subflye_sample04	tryc	subflye	sample04	NOR	flye	sub	tryc_subflye_sample04_contig2352	contig2352	NA	NA	NA	root (UID1)	5656	56	24	56	0	0	0	0	0	0	0	0	6256	68	4520850	19282583	68	5
NOR_Tryc_subflye_sample04	tryc	subflye	sample04	NOR	flye	sub	tryc_subflye_sample04_contig2356	contig2356	NA	NA	NA	root (UID1)	5656	56	24	56	0	0	0	0	0	0	0	0	32169	68	4520850	19282583	68	5
NOR_Tryc_subflye_sample04	tryc	subflye	sample04	NOR	flye	sub	tryc_subflye_sample04_contig2361	contig2361	NA	NA	NA	root (UID1)	5656	56	24	56	0	0	0	0	0	0	0	0	17571	68	4520850	19282583	68	5
NOR_Tryc_subflye_sample04	tryc	subflye	sample04	NOR	flye	sub	tryc_subflye_sample04_contig2362	contig2362	NA	NA	NA	root (UID1)	5656	56	24	56	0	0	0	0	0	0	0	0	5550	68	4520850	19282583	68	5
NOR_Tryc_subflye_sample04	tryc	subflye	sample04	NOR	flye	sub	tryc_subflye_sample04_contig2368	contig2368	NA	NA	NA	k__Bacteria (UID203)	5449	104	58	101	3	0	0	0	0	1.18	0	0	41414	68	4520850	19282583	68	5
NOR_Tryc_subflye_sample04	tryc	subflye	sample04	NOR	flye	sub	tryc_subflye_sample04_contig2369	contig2369	NA	NA	NA	root (UID1)	5656	56	24	56	0	0	0	0	0	0	0	0	78130	68	4520850	19282583	68	5
NOR_Tryc_subflye_sample04	tryc	subflye	sample04	NOR	flye	sub	tryc_subflye_sample04_contig237	contig237	NA	NA	NA	root (UID1)	5656	56	24	56	0	0	0	0	0	0	0	0	31239	68	4520850	19282583	68	5
NOR_Tryc_subflye_sample04	tryc	subflye	sample04	NOR	flye	sub	tryc_subflye_sample04_contig2373	contig2373	NA	NA	NA	root (UID1)	5656	56	24	56	0	0	0	0	0	0	0	0	20273	68	4520850	19282583	68	5
NOR_Tryc_subflye_sample04	tryc	subflye	sample04	NOR	flye	sub	NA	contig2374	NA	NA	NA	NA	NA	NA	NA	NA	NA	NA	NA	NA	NA	NA	NA	NA	4277	68	4520850	19282583	68	5
NOR_Tryc_subflye_sample04	tryc	subflye	sample04	NOR	flye	sub	tryc_subflye_sample04_contig240	contig240	NA	NA	NA	root (UID1)	5656	56	24	56	0	0	0	0	0	0	0	0	3637	68	4520850	19282583	68	5
NOR_Tryc_subflye_sample04	tryc	subflye	sample04	NOR	flye	sub	tryc_subflye_sample04_contig27	contig27	d__Bacteria;p__Bacteroidota	d__Bacteria	p__Bacteroidota	o__Cytophagales (UID2936)	47	454	336	93	357	4	0	0	0	76.72	0.74	0	4520850	68	4520850	19282583	68	5
NOR_Tryc_subflye_sample04	tryc	subflye	sample04	NOR	flye	sub	tryc_subflye_sample04_contig290	contig290	NA	NA	NA	root (UID1)	5656	56	24	56	0	0	0	0	0	0	0	0	878	68	4520850	19282583	68	5
NOR_Tryc_subflye_sample04	tryc	subflye	sample04	NOR	flye	sub	tryc_subflye_sample04_contig328	contig328	NA	NA	NA	root (UID1)	5656	56	24	56	0	0	0	0	0	0	0	0	7548	68	4520850	19282583	68	5
NOR_Tryc_subflye_sample04	tryc	subflye	sample04	NOR	flye	sub	tryc_subflye_sample04_contig343	contig343	NA	NA	NA	root (UID1)	5656	56	24	56	0	0	0	0	0	0	0	0	184144	68	4520850	19282583	68	5
NOR_Tryc_subflye_sample04	tryc	subflye	sample04	NOR	flye	sub	tryc_subflye_sample04_contig346	contig346	NA	NA	NA	root (UID1)	5656	56	24	56	0	0	0	0	0	0	0	0	87991	68	4520850	19282583	68	5
NOR_Tryc_subflye_sample04	tryc	subflye	sample04	NOR	flye	sub	tryc_subflye_sample04_contig348	contig348	NA	NA	NA	root (UID1)	5656	56	24	56	0	0	0	0	0	0	0	0	13629	68	4520850	19282583	68	5
NOR_Tryc_subflye_sample04	tryc	subflye	sample04	NOR	flye	sub	tryc_subflye_sample04_contig37	contig37	d__Bacteria;p__Nitrospirota	d__Bacteria	p__Nitrospirota	k__Bacteria (UID3187)	2258	181	110	44	134	3	0	0	0	69.59	2.73	0	4106113	68	4520850	19282583	68	5
NOR_Tryc_subflye_sample04	tryc	subflye	sample04	NOR	flye	sub	tryc_subflye_sample04_contig41	contig41	d__Bacteria;p__Bacteroidota	d__Bacteria	p__Bacteroidota	o__Cytophagales (UID2936)	47	454	336	73	376	5	0	0	0	83.02	1.19	0	4115332	68	4520850	19282583	68	5
NOR_Tryc_subflye_sample04	tryc	subflye	sample04	NOR	flye	sub	tryc_subflye_sample04_contig427	contig427	NA	NA	NA	root (UID1)	5656	56	24	56	0	0	0	0	0	0	0	0	74732	68	4520850	19282583	68	5
NOR_Tryc_subflye_sample04	tryc	subflye	sample04	NOR	flye	sub	tryc_subflye_sample04_contig450	contig450	NA	NA	NA	root (UID1)	5656	56	24	56	0	0	0	0	0	0	0	0	9167	68	4520850	19282583	68	5
NOR_Tryc_subflye_sample04	tryc	subflye	sample04	NOR	flye	sub	tryc_subflye_sample04_contig51	contig51	d__Bacteria;p__Proteobacteria	d__Bacteria	p__Proteobacteria	c__Gammaproteobacteria (UID4202)	67	481	276	131	347	3	0	0	0	68.53	0.21	0	2616558	68	4520850	19282583	68	5
NOR_Tryc_subflye_sample04	tryc	subflye	sample04	NOR	flye	sub	tryc_subflye_sample04_contig515	contig515	NA	NA	NA	root (UID1)	5656	56	24	56	0	0	0	0	0	0	0	0	6835	68	4520850	19282583	68	5
NOR_Tryc_subflye_sample04	tryc	subflye	sample04	NOR	flye	sub	tryc_subflye_sample04_contig518	contig518	NA	NA	NA	root (UID1)	5656	56	24	56	0	0	0	0	0	0	0	0	12977	68	4520850	19282583	68	5
NOR_Tryc_subflye_sample04	tryc	subflye	sample04	NOR	flye	sub	tryc_subflye_sample04_contig578	contig578	NA	NA	NA	root (UID1)	5656	56	24	56	0	0	0	0	0	0	0	0	43098	68	4520850	19282583	68	5
NOR_Tryc_subflye_sample04	tryc	subflye	sample04	NOR	flye	sub	tryc_subflye_sample04_contig586	contig586	NA	NA	NA	root (UID1)	5656	56	24	56	0	0	0	0	0	0	0	0	3187	68	4520850	19282583	68	5
NOR_Tryc_subflye_sample04	tryc	subflye	sample04	NOR	flye	sub	tryc_subflye_sample04_contig651	contig651	NA	NA	NA	root (UID1)	5656	56	24	56	0	0	0	0	0	0	0	0	120217	68	4520850	19282583	68	5
NOR_Tryc_subflye_sample04	tryc	subflye	sample04	NOR	flye	sub	tryc_subflye_sample04_contig706	contig706	NA	NA	NA	root (UID1)	5656	56	24	56	0	0	0	0	0	0	0	0	5937	68	4520850	19282583	68	5
NOR_Tryc_subflye_sample04	tryc	subflye	sample04	NOR	flye	sub	tryc_subflye_sample04_contig708	contig708	NA	NA	NA	root (UID1)	5656	56	24	56	0	0	0	0	0	0	0	0	3693	68	4520850	19282583	68	5
NOR_Tryc_subflye_sample04	tryc	subflye	sample04	NOR	flye	sub	tryc_subflye_sample04_contig848	contig848	NA	NA	NA	root (UID1)	5656	56	24	56	0	0	0	0	0	0	0	0	4541	68	4520850	19282583	68	5
NOR_Tryc_subflye_sample04	tryc	subflye	sample04	NOR	flye	sub	tryc_subflye_sample04_contig865	contig865	NA	NA	NA	root (UID1)	5656	56	24	56	0	0	0	0	0	0	0	0	11953	68	4520850	19282583	68	5
NOR_Tryc_subflye_sample04	tryc	subflye	sample04	NOR	flye	sub	tryc_subflye_sample04_contig882	contig882	NA	NA	NA	root (UID1)	5656	56	24	56	0	0	0	0	0	0	0	0	4548	68	4520850	19282583	68	5
NOR_Tryc_subflye_sample05	tryc	subflye	sample05	NOR	flye	sub	tryc_subflye_sample05_contig103	contig103	d__Bacteria;p__Bacteroidota	d__Bacteria	p__Bacteroidota	p__Bacteroidetes (UID2591)	364	303	203	100	198	5	0	0	0	63.49	1.18	0	3960279	60	4520892	24736178	60	6
NOR_Tryc_subflye_sample05	tryc	subflye	sample05	NOR	flye	sub	tryc_subflye_sample05_contig110	contig110	NA	NA	NA	root (UID1)	5656	56	24	56	0	0	0	0	0	0	0	0	5801	60	4520892	24736178	60	6
NOR_Tryc_subflye_sample05	tryc	subflye	sample05	NOR	flye	sub	tryc_subflye_sample05_contig1106	contig1106	NA	NA	NA	root (UID1)	5656	56	24	56	0	0	0	0	0	0	0	0	5225	60	4520892	24736178	60	6
NOR_Tryc_subflye_sample05	tryc	subflye	sample05	NOR	flye	sub	tryc_subflye_sample05_contig1141	contig1141	NA	NA	NA	root (UID1)	5656	56	24	56	0	0	0	0	0	0	0	0	8835	60	4520892	24736178	60	6
NOR_Tryc_subflye_sample05	tryc	subflye	sample05	NOR	flye	sub	tryc_subflye_sample05_contig1152	contig1152	NA	NA	NA	root (UID1)	5656	56	24	56	0	0	0	0	0	0	0	0	6753	60	4520892	24736178	60	6
NOR_Tryc_subflye_sample05	tryc	subflye	sample05	NOR	flye	sub	tryc_subflye_sample05_contig1163	contig1163	NA	NA	NA	root (UID1)	5656	56	24	56	0	0	0	0	0	0	0	0	5022	60	4520892	24736178	60	6
NOR_Tryc_subflye_sample05	tryc	subflye	sample05	NOR	flye	sub	tryc_subflye_sample05_contig1195	contig1195	NA	NA	NA	root (UID1)	5656	56	24	56	0	0	0	0	0	0	0	0	6652	60	4520892	24736178	60	6
NOR_Tryc_subflye_sample05	tryc	subflye	sample05	NOR	flye	sub	tryc_subflye_sample05_contig1238	contig1238	NA	NA	NA	root (UID1)	5656	56	24	56	0	0	0	0	0	0	0	0	43100	60	4520892	24736178	60	6
NOR_Tryc_subflye_sample05	tryc	subflye	sample05	NOR	flye	sub	tryc_subflye_sample05_contig1282	contig1282	NA	NA	NA	root (UID1)	5656	56	24	56	0	0	0	0	0	0	0	0	21089	60	4520892	24736178	60	6
NOR_Tryc_subflye_sample05	tryc	subflye	sample05	NOR	flye	sub	tryc_subflye_sample05_contig1494	contig1494	NA	NA	NA	root (UID1)	5656	56	24	56	0	0	0	0	0	0	0	0	16927	60	4520892	24736178	60	6
NOR_Tryc_subflye_sample05	tryc	subflye	sample05	NOR	flye	sub	tryc_subflye_sample05_contig1517	contig1517	NA	NA	NA	root (UID1)	5656	56	24	56	0	0	0	0	0	0	0	0	7383	60	4520892	24736178	60	6
NOR_Tryc_subflye_sample05	tryc	subflye	sample05	NOR	flye	sub	tryc_subflye_sample05_contig1519	contig1519	NA	NA	NA	root (UID1)	5656	56	24	56	0	0	0	0	0	0	0	0	5462	60	4520892	24736178	60	6
NOR_Tryc_subflye_sample05	tryc	subflye	sample05	NOR	flye	sub	tryc_subflye_sample05_contig1642	contig1642	NA	NA	NA	root (UID1)	5656	56	24	56	0	0	0	0	0	0	0	0	19309	60	4520892	24736178	60	6
NOR_Tryc_subflye_sample05	tryc	subflye	sample05	NOR	flye	sub	tryc_subflye_sample05_contig168	contig168	NA	NA	NA	root (UID1)	5656	56	24	56	0	0	0	0	0	0	0	0	6572	60	4520892	24736178	60	6
NOR_Tryc_subflye_sample05	tryc	subflye	sample05	NOR	flye	sub	tryc_subflye_sample05_contig1695	contig1695	NA	NA	NA	root (UID1)	5656	56	24	56	0	0	0	0	0	0	0	0	33911	60	4520892	24736178	60	6
NOR_Tryc_subflye_sample05	tryc	subflye	sample05	NOR	flye	sub	tryc_subflye_sample05_contig1743	contig1743	NA	NA	NA	root (UID1)	5656	56	24	56	0	0	0	0	0	0	0	0	1993	60	4520892	24736178	60	6
NOR_Tryc_subflye_sample05	tryc	subflye	sample05	NOR	flye	sub	tryc_subflye_sample05_contig18	contig18	d__Bacteria;p__Bacteroidota	d__Bacteria	p__Bacteroidota	o__Cytophagales (UID2936)	47	454	336	70	378	5	1	0	0	82.91	1.55	0	4115315	60	4520892	24736178	60	6
NOR_Tryc_subflye_sample05	tryc	subflye	sample05	NOR	flye	sub	tryc_subflye_sample05_contig180	contig180	d__Bacteria;p__Proteobacteria	d__Bacteria	p__Proteobacteria	f__Rhodobacteraceae (UID3340)	84	568	330	333	235	0	0	0	0	44.55	0	0	3787604	60	4520892	24736178	60	6
NOR_Tryc_subflye_sample05	tryc	subflye	sample05	NOR	flye	sub	tryc_subflye_sample05_contig1864	contig1864	NA	NA	NA	root (UID1)	5656	56	24	56	0	0	0	0	0	0	0	0	9173	60	4520892	24736178	60	6
NOR_Tryc_subflye_sample05	tryc	subflye	sample05	NOR	flye	sub	tryc_subflye_sample05_contig1870	contig1870	NA	NA	NA	root (UID1)	5656	56	24	56	0	0	0	0	0	0	0	0	182788	60	4520892	24736178	60	6
NOR_Tryc_subflye_sample05	tryc	subflye	sample05	NOR	flye	sub	tryc_subflye_sample05_contig188	contig188	d__Bacteria;p__Nitrospirota	d__Bacteria	p__Nitrospirota	k__Bacteria (UID3187)	2258	181	110	43	136	2	0	0	0	71.1	1.82	0	4106122	60	4520892	24736178	60	6
NOR_Tryc_subflye_sample05	tryc	subflye	sample05	NOR	flye	sub	tryc_subflye_sample05_contig1917	contig1917	NA	NA	NA	root (UID1)	5656	56	24	56	0	0	0	0	0	0	0	0	1688	60	4520892	24736178	60	6
NOR_Tryc_subflye_sample05	tryc	subflye	sample05	NOR	flye	sub	tryc_subflye_sample05_contig1949	contig1949	NA	NA	NA	root (UID1)	5656	56	24	56	0	0	0	0	0	0	0	0	4955	60	4520892	24736178	60	6
NOR_Tryc_subflye_sample05	tryc	subflye	sample05	NOR	flye	sub	tryc_subflye_sample05_contig1951	contig1951	NA	NA	NA	root (UID1)	5656	56	24	56	0	0	0	0	0	0	0	0	2896	60	4520892	24736178	60	6
NOR_Tryc_subflye_sample05	tryc	subflye	sample05	NOR	flye	sub	tryc_subflye_sample05_contig1976	contig1976	NA	NA	NA	root (UID1)	5656	56	24	56	0	0	0	0	0	0	0	0	20994	60	4520892	24736178	60	6
NOR_Tryc_subflye_sample05	tryc	subflye	sample05	NOR	flye	sub	tryc_subflye_sample05_contig1977	contig1977	NA	NA	NA	root (UID1)	5656	56	24	56	0	0	0	0	0	0	0	0	44249	60	4520892	24736178	60	6
NOR_Tryc_subflye_sample05	tryc	subflye	sample05	NOR	flye	sub	tryc_subflye_sample05_contig1996	contig1996	NA	NA	NA	root (UID1)	5656	56	24	56	0	0	0	0	0	0	0	0	21141	60	4520892	24736178	60	6
NOR_Tryc_subflye_sample05	tryc	subflye	sample05	NOR	flye	sub	tryc_subflye_sample05_contig1999	contig1999	NA	NA	NA	root (UID1)	5656	56	24	56	0	0	0	0	0	0	0	0	3640	60	4520892	24736178	60	6
NOR_Tryc_subflye_sample05	tryc	subflye	sample05	NOR	flye	sub	tryc_subflye_sample05_contig2061	contig2061	NA	NA	NA	root (UID1)	5656	56	24	56	0	0	0	0	0	0	0	0	4227	60	4520892	24736178	60	6
NOR_Tryc_subflye_sample05	tryc	subflye	sample05	NOR	flye	sub	tryc_subflye_sample05_contig21	contig21	d__Bacteria;p__Proteobacteria	d__Bacteria	p__Proteobacteria	c__Gammaproteobacteria (UID4202)	67	481	276	75	399	7	0	0	0	82.52	1.58	0	2730505	60	4520892	24736178	60	6
NOR_Tryc_subflye_sample05	tryc	subflye	sample05	NOR	flye	sub	tryc_subflye_sample05_contig223	contig223	NA	NA	NA	root (UID1)	5656	56	24	56	0	0	0	0	0	0	0	0	4211	60	4520892	24736178	60	6
NOR_Tryc_subflye_sample05	tryc	subflye	sample05	NOR	flye	sub	tryc_subflye_sample05_contig2270	contig2270	NA	NA	NA	root (UID1)	5656	56	24	56	0	0	0	0	0	0	0	0	19764	60	4520892	24736178	60	6
NOR_Tryc_subflye_sample05	tryc	subflye	sample05	NOR	flye	sub	tryc_subflye_sample05_contig2297	contig2297	NA	NA	NA	root (UID1)	5656	56	24	56	0	0	0	0	0	0	0	0	4503	60	4520892	24736178	60	6
NOR_Tryc_subflye_sample05	tryc	subflye	sample05	NOR	flye	sub	tryc_subflye_sample05_contig2308	contig2308	NA	NA	NA	root (UID1)	5656	56	24	56	0	0	0	0	0	0	0	0	20274	60	4520892	24736178	60	6
NOR_Tryc_subflye_sample05	tryc	subflye	sample05	NOR	flye	sub	tryc_subflye_sample05_contig2316	contig2316	NA	NA	NA	root (UID1)	5656	56	24	56	0	0	0	0	0	0	0	0	15606	60	4520892	24736178	60	6
NOR_Tryc_subflye_sample05	tryc	subflye	sample05	NOR	flye	sub	tryc_subflye_sample05_contig2318	contig2318	NA	NA	NA	root (UID1)	5656	56	24	56	0	0	0	0	0	0	0	0	58032	60	4520892	24736178	60	6
NOR_Tryc_subflye_sample05	tryc	subflye	sample05	NOR	flye	sub	tryc_subflye_sample05_contig2320	contig2320	NA	NA	NA	k__Bacteria (UID203)	5449	103	57	100	3	0	0	0	0	0.9	0	0	41464	60	4520892	24736178	60	6
NOR_Tryc_subflye_sample05	tryc	subflye	sample05	NOR	flye	sub	tryc_subflye_sample05_contig2333	contig2333	NA	NA	NA	root (UID1)	5656	56	24	56	0	0	0	0	0	0	0	0	17573	60	4520892	24736178	60	6
NOR_Tryc_subflye_sample05	tryc	subflye	sample05	NOR	flye	sub	tryc_subflye_sample05_contig2340	contig2340	NA	NA	NA	root (UID1)	5656	56	24	56	0	0	0	0	0	0	0	0	17694	60	4520892	24736178	60	6
NOR_Tryc_subflye_sample05	tryc	subflye	sample05	NOR	flye	sub	tryc_subflye_sample05_contig2356	contig2356	NA	NA	NA	root (UID1)	5656	56	24	56	0	0	0	0	0	0	0	0	2042	60	4520892	24736178	60	6
NOR_Tryc_subflye_sample05	tryc	subflye	sample05	NOR	flye	sub	tryc_subflye_sample05_contig2359	contig2359	NA	NA	NA	root (UID1)	5656	56	24	56	0	0	0	0	0	0	0	0	1953	60	4520892	24736178	60	6
NOR_Tryc_subflye_sample05	tryc	subflye	sample05	NOR	flye	sub	tryc_subflye_sample05_contig2364	contig2364	NA	NA	NA	root (UID1)	5656	56	24	56	0	0	0	0	0	0	0	0	9116	60	4520892	24736178	60	6
NOR_Tryc_subflye_sample05	tryc	subflye	sample05	NOR	flye	sub	tryc_subflye_sample05_contig2365	contig2365	NA	NA	NA	root (UID1)	5656	56	24	56	0	0	0	0	0	0	0	0	36265	60	4520892	24736178	60	6
NOR_Tryc_subflye_sample05	tryc	subflye	sample05	NOR	flye	sub	tryc_subflye_sample05_contig2368	contig2368	NA	NA	NA	root (UID1)	5656	56	24	56	0	0	0	0	0	0	0	0	25473	60	4520892	24736178	60	6
NOR_Tryc_subflye_sample05	tryc	subflye	sample05	NOR	flye	sub	tryc_subflye_sample05_contig2371	contig2371	NA	NA	NA	root (UID1)	5656	56	24	56	0	0	0	0	0	0	0	0	11776	60	4520892	24736178	60	6
NOR_Tryc_subflye_sample05	tryc	subflye	sample05	NOR	flye	sub	tryc_subflye_sample05_contig2372	contig2372	NA	NA	NA	root (UID1)	5656	56	24	56	0	0	0	0	0	0	0	0	15690	60	4520892	24736178	60	6
NOR_Tryc_subflye_sample05	tryc	subflye	sample05	NOR	flye	sub	tryc_subflye_sample05_contig2380	contig2380	NA	NA	NA	root (UID1)	5656	56	24	56	0	0	0	0	0	0	0	0	87958	60	4520892	24736178	60	6
NOR_Tryc_subflye_sample05	tryc	subflye	sample05	NOR	flye	sub	tryc_subflye_sample05_contig2387	contig2387	NA	NA	NA	root (UID1)	5656	56	24	56	0	0	0	0	0	0	0	0	78178	60	4520892	24736178	60	6
NOR_Tryc_subflye_sample05	tryc	subflye	sample05	NOR	flye	sub	tryc_subflye_sample05_contig2389	contig2389	NA	NA	NA	root (UID1)	5656	56	24	56	0	0	0	0	0	0	0	0	39534	60	4520892	24736178	60	6
NOR_Tryc_subflye_sample05	tryc	subflye	sample05	NOR	flye	sub	tryc_subflye_sample05_contig279	contig279	NA	NA	NA	root (UID1)	5656	56	24	56	0	0	0	0	0	0	0	0	5907	60	4520892	24736178	60	6
NOR_Tryc_subflye_sample05	tryc	subflye	sample05	NOR	flye	sub	tryc_subflye_sample05_contig361	contig361	NA	NA	NA	root (UID1)	5656	56	24	56	0	0	0	0	0	0	0	0	184138	60	4520892	24736178	60	6
NOR_Tryc_subflye_sample05	tryc	subflye	sample05	NOR	flye	sub	tryc_subflye_sample05_contig404	contig404	NA	NA	NA	root (UID1)	5656	56	24	56	0	0	0	0	0	0	0	0	122515	60	4520892	24736178	60	6
NOR_Tryc_subflye_sample05	tryc	subflye	sample05	NOR	flye	sub	tryc_subflye_sample05_contig443	contig443	NA	NA	NA	root (UID1)	5656	56	24	56	0	0	0	0	0	0	0	0	115448	60	4520892	24736178	60	6
NOR_Tryc_subflye_sample05	tryc	subflye	sample05	NOR	flye	sub	tryc_subflye_sample05_contig545	contig545	NA	NA	NA	root (UID1)	5656	56	24	56	0	0	0	0	0	0	0	0	12985	60	4520892	24736178	60	6
NOR_Tryc_subflye_sample05	tryc	subflye	sample05	NOR	flye	sub	tryc_subflye_sample05_contig60	contig60	NA	NA	NA	root (UID1)	5656	56	24	56	0	0	0	0	0	0	0	0	31232	60	4520892	24736178	60	6
NOR_Tryc_subflye_sample05	tryc	subflye	sample05	NOR	flye	sub	tryc_subflye_sample05_contig609	contig609	NA	NA	NA	root (UID1)	5656	56	24	56	0	0	0	0	0	0	0	0	4549	60	4520892	24736178	60	6
NOR_Tryc_subflye_sample05	tryc	subflye	sample05	NOR	flye	sub	tryc_subflye_sample05_contig622	contig622	NA	NA	NA	root (UID1)	5656	56	24	56	0	0	0	0	0	0	0	0	1757	60	4520892	24736178	60	6
NOR_Tryc_subflye_sample05	tryc	subflye	sample05	NOR	flye	sub	tryc_subflye_sample05_contig647	contig647	NA	NA	NA	root (UID1)	5656	56	24	56	0	0	0	0	0	0	0	0	7843	60	4520892	24736178	60	6
NOR_Tryc_subflye_sample05	tryc	subflye	sample05	NOR	flye	sub	tryc_subflye_sample05_contig74	contig74	d__Bacteria;p__Bacteroidota	d__Bacteria	p__Bacteroidota	o__Cytophagales (UID2936)	47	454	336	90	360	4	0	0	0	77.23	0.75	0	4520892	60	4520892	24736178	60	6
NOR_Tryc_subflye_sample05	tryc	subflye	sample05	NOR	flye	sub	tryc_subflye_sample05_contig82	contig82	NA	NA	NA	root (UID1)	5656	56	24	56	0	0	0	0	0	0	0	0	32196	60	4520892	24736178	60	6
NOR_Tryc_subflye_sample06	tryc	subflye	sample06	NOR	flye	sub	tryc_subflye_sample06_contig1004	contig1004	NA	NA	NA	root (UID1)	5656	56	24	56	0	0	0	0	0	0	0	0	5167	68	5210688	29433624	68	7
NOR_Tryc_subflye_sample06	tryc	subflye	sample06	NOR	flye	sub	tryc_subflye_sample06_contig1009	contig1009	NA	NA	NA	root (UID1)	5656	56	24	56	0	0	0	0	0	0	0	0	5100	68	5210688	29433624	68	7
NOR_Tryc_subflye_sample06	tryc	subflye	sample06	NOR	flye	sub	tryc_subflye_sample06_contig1076	contig1076	NA	NA	NA	root (UID1)	5656	56	24	56	0	0	0	0	0	0	0	0	16936	68	5210688	29433624	68	7
NOR_Tryc_subflye_sample06	tryc	subflye	sample06	NOR	flye	sub	tryc_subflye_sample06_contig1081	contig1081	NA	NA	NA	root (UID1)	5656	56	24	56	0	0	0	0	0	0	0	0	12985	68	5210688	29433624	68	7
NOR_Tryc_subflye_sample06	tryc	subflye	sample06	NOR	flye	sub	tryc_subflye_sample06_contig1100	contig1100	NA	NA	NA	root (UID1)	5656	56	24	56	0	0	0	0	0	0	0	0	9168	68	5210688	29433624	68	7
NOR_Tryc_subflye_sample06	tryc	subflye	sample06	NOR	flye	sub	tryc_subflye_sample06_contig1114	contig1114	NA	NA	NA	root (UID1)	5656	56	24	56	0	0	0	0	0	0	0	0	4586	68	5210688	29433624	68	7
NOR_Tryc_subflye_sample06	tryc	subflye	sample06	NOR	flye	sub	tryc_subflye_sample06_contig1140	contig1140	NA	NA	NA	root (UID1)	5656	56	24	56	0	0	0	0	0	0	0	0	1995	68	5210688	29433624	68	7
NOR_Tryc_subflye_sample06	tryc	subflye	sample06	NOR	flye	sub	tryc_subflye_sample06_contig1160	contig1160	NA	NA	NA	root (UID1)	5656	56	24	56	0	0	0	0	0	0	0	0	3788	68	5210688	29433624	68	7
NOR_Tryc_subflye_sample06	tryc	subflye	sample06	NOR	flye	sub	tryc_subflye_sample06_contig1203	contig1203	NA	NA	NA	root (UID1)	5656	56	24	56	0	0	0	0	0	0	0	0	3103	68	5210688	29433624	68	7
NOR_Tryc_subflye_sample06	tryc	subflye	sample06	NOR	flye	sub	tryc_subflye_sample06_contig1254	contig1254	NA	NA	NA	root (UID1)	5656	56	24	56	0	0	0	0	0	0	0	0	58042	68	5210688	29433624	68	7
NOR_Tryc_subflye_sample06	tryc	subflye	sample06	NOR	flye	sub	tryc_subflye_sample06_contig1410	contig1410	NA	NA	NA	root (UID1)	5656	56	24	56	0	0	0	0	0	0	0	0	5017	68	5210688	29433624	68	7
NOR_Tryc_subflye_sample06	tryc	subflye	sample06	NOR	flye	sub	tryc_subflye_sample06_contig1414	contig1414	NA	NA	NA	root (UID1)	5656	56	24	56	0	0	0	0	0	0	0	0	1676	68	5210688	29433624	68	7
NOR_Tryc_subflye_sample06	tryc	subflye	sample06	NOR	flye	sub	tryc_subflye_sample06_contig1450	contig1450	NA	NA	NA	root (UID1)	5656	56	24	56	0	0	0	0	0	0	0	0	4998	68	5210688	29433624	68	7
NOR_Tryc_subflye_sample06	tryc	subflye	sample06	NOR	flye	sub	tryc_subflye_sample06_contig1472	contig1472	NA	NA	NA	root (UID1)	5656	56	24	56	0	0	0	0	0	0	0	0	8973	68	5210688	29433624	68	7
NOR_Tryc_subflye_sample06	tryc	subflye	sample06	NOR	flye	sub	tryc_subflye_sample06_contig1476	contig1476	NA	NA	NA	root (UID1)	5656	56	24	56	0	0	0	0	0	0	0	0	34626	68	5210688	29433624	68	7
NOR_Tryc_subflye_sample06	tryc	subflye	sample06	NOR	flye	sub	tryc_subflye_sample06_contig1498	contig1498	NA	NA	NA	root (UID1)	5656	56	24	56	0	0	0	0	0	0	0	0	11097	68	5210688	29433624	68	7
NOR_Tryc_subflye_sample06	tryc	subflye	sample06	NOR	flye	sub	tryc_subflye_sample06_contig1510	contig1510	NA	NA	NA	root (UID1)	5656	56	24	56	0	0	0	0	0	0	0	0	6557	68	5210688	29433624	68	7
NOR_Tryc_subflye_sample06	tryc	subflye	sample06	NOR	flye	sub	tryc_subflye_sample06_contig1605	contig1605	NA	NA	NA	root (UID1)	5656	56	24	56	0	0	0	0	0	0	0	0	3748	68	5210688	29433624	68	7
NOR_Tryc_subflye_sample06	tryc	subflye	sample06	NOR	flye	sub	tryc_subflye_sample06_contig1639	contig1639	NA	NA	NA	root (UID1)	5656	56	24	56	0	0	0	0	0	0	0	0	21030	68	5210688	29433624	68	7
NOR_Tryc_subflye_sample06	tryc	subflye	sample06	NOR	flye	sub	tryc_subflye_sample06_contig168	contig168	NA	NA	NA	root (UID1)	5656	56	24	56	0	0	0	0	0	0	0	0	42384	68	5210688	29433624	68	7
NOR_Tryc_subflye_sample06	tryc	subflye	sample06	NOR	flye	sub	tryc_subflye_sample06_contig1682	contig1682	NA	NA	NA	root (UID1)	5656	56	24	56	0	0	0	0	0	0	0	0	4540	68	5210688	29433624	68	7
NOR_Tryc_subflye_sample06	tryc	subflye	sample06	NOR	flye	sub	tryc_subflye_sample06_contig1708	contig1708	NA	NA	NA	root (UID1)	5656	56	24	56	0	0	0	0	0	0	0	0	1218	68	5210688	29433624	68	7
NOR_Tryc_subflye_sample06	tryc	subflye	sample06	NOR	flye	sub	tryc_subflye_sample06_contig174	contig174	d__Bacteria;p__Bacteroidota	d__Bacteria	p__Bacteroidota	o__Cytophagales (UID2936)	47	454	336	76	372	6	0	0	0	81.19	1.25	0	4115347	68	5210688	29433624	68	7
NOR_Tryc_subflye_sample06	tryc	subflye	sample06	NOR	flye	sub	tryc_subflye_sample06_contig1813	contig1813	NA	NA	NA	root (UID1)	5656	56	24	56	0	0	0	0	0	0	0	0	3603	68	5210688	29433624	68	7
NOR_Tryc_subflye_sample06	tryc	subflye	sample06	NOR	flye	sub	tryc_subflye_sample06_contig1837	contig1837	NA	NA	NA	root (UID1)	5656	56	24	56	0	0	0	0	0	0	0	0	3544	68	5210688	29433624	68	7
NOR_Tryc_subflye_sample06	tryc	subflye	sample06	NOR	flye	sub	tryc_subflye_sample06_contig1861	contig1861	NA	NA	NA	root (UID1)	5656	56	24	56	0	0	0	0	0	0	0	0	184301	68	5210688	29433624	68	7
NOR_Tryc_subflye_sample06	tryc	subflye	sample06	NOR	flye	sub	tryc_subflye_sample06_contig1887	contig1887	NA	NA	NA	root (UID1)	5656	56	24	56	0	0	0	0	0	0	0	0	3703	68	5210688	29433624	68	7
NOR_Tryc_subflye_sample06	tryc	subflye	sample06	NOR	flye	sub	tryc_subflye_sample06_contig1916	contig1916	NA	NA	NA	root (UID1)	5656	56	24	56	0	0	0	0	0	0	0	0	12005	68	5210688	29433624	68	7
NOR_Tryc_subflye_sample06	tryc	subflye	sample06	NOR	flye	sub	tryc_subflye_sample06_contig1924	contig1924	NA	NA	NA	root (UID1)	5656	56	24	56	0	0	0	0	0	0	0	0	6838	68	5210688	29433624	68	7
NOR_Tryc_subflye_sample06	tryc	subflye	sample06	NOR	flye	sub	tryc_subflye_sample06_contig1978	contig1978	NA	NA	NA	root (UID1)	5656	56	24	56	0	0	0	0	0	0	0	0	10902	68	5210688	29433624	68	7
NOR_Tryc_subflye_sample06	tryc	subflye	sample06	NOR	flye	sub	tryc_subflye_sample06_contig2	contig2	d__Bacteria;p__Nitrospirota	d__Bacteria	p__Nitrospirota	k__Bacteria (UID3187)	2258	181	110	42	136	3	0	0	0	70.55	2	0	4106203	68	5210688	29433624	68	7
NOR_Tryc_subflye_sample06	tryc	subflye	sample06	NOR	flye	sub	tryc_subflye_sample06_contig2021	contig2021	NA	NA	NA	root (UID1)	5656	56	24	56	0	0	0	0	0	0	0	0	6687	68	5210688	29433624	68	7
NOR_Tryc_subflye_sample06	tryc	subflye	sample06	NOR	flye	sub	tryc_subflye_sample06_contig2078	contig2078	NA	NA	NA	root (UID1)	5656	56	24	56	0	0	0	0	0	0	0	0	5947	68	5210688	29433624	68	7
NOR_Tryc_subflye_sample06	tryc	subflye	sample06	NOR	flye	sub	tryc_subflye_sample06_contig2225	contig2225	NA	NA	NA	root (UID1)	5656	56	24	56	0	0	0	0	0	0	0	0	5789	68	5210688	29433624	68	7
NOR_Tryc_subflye_sample06	tryc	subflye	sample06	NOR	flye	sub	tryc_subflye_sample06_contig2242	contig2242	NA	NA	NA	root (UID1)	5656	56	24	56	0	0	0	0	0	0	0	0	31247	68	5210688	29433624	68	7
NOR_Tryc_subflye_sample06	tryc	subflye	sample06	NOR	flye	sub	tryc_subflye_sample06_contig2305	contig2305	NA	NA	NA	root (UID1)	5656	56	24	56	0	0	0	0	0	0	0	0	43104	68	5210688	29433624	68	7
NOR_Tryc_subflye_sample06	tryc	subflye	sample06	NOR	flye	sub	tryc_subflye_sample06_contig2317	contig2317	NA	NA	NA	root (UID1)	5656	56	24	56	0	0	0	0	0	0	0	0	4552	68	5210688	29433624	68	7
NOR_Tryc_subflye_sample06	tryc	subflye	sample06	NOR	flye	sub	tryc_subflye_sample06_contig2320	contig2320	NA	NA	NA	root (UID1)	5656	56	24	56	0	0	0	0	0	0	0	0	20978	68	5210688	29433624	68	7
NOR_Tryc_subflye_sample06	tryc	subflye	sample06	NOR	flye	sub	tryc_subflye_sample06_contig2340	contig2340	NA	NA	NA	root (UID1)	5656	56	24	56	0	0	0	0	0	0	0	0	25455	68	5210688	29433624	68	7
NOR_Tryc_subflye_sample06	tryc	subflye	sample06	NOR	flye	sub	tryc_subflye_sample06_contig2341	contig2341	NA	NA	NA	root (UID1)	5656	56	24	56	0	0	0	0	0	0	0	0	9627	68	5210688	29433624	68	7
NOR_Tryc_subflye_sample06	tryc	subflye	sample06	NOR	flye	sub	tryc_subflye_sample06_contig2359	contig2359	NA	NA	NA	root (UID1)	5656	56	24	56	0	0	0	0	0	0	0	0	2060	68	5210688	29433624	68	7
NOR_Tryc_subflye_sample06	tryc	subflye	sample06	NOR	flye	sub	tryc_subflye_sample06_contig2362	contig2362	NA	NA	NA	root (UID1)	5656	56	24	56	0	0	0	0	0	0	0	0	4332	68	5210688	29433624	68	7
NOR_Tryc_subflye_sample06	tryc	subflye	sample06	NOR	flye	sub	tryc_subflye_sample06_contig2365	contig2365	NA	NA	NA	root (UID1)	5656	56	24	56	0	0	0	0	0	0	0	0	7839	68	5210688	29433624	68	7
NOR_Tryc_subflye_sample06	tryc	subflye	sample06	NOR	flye	sub	tryc_subflye_sample06_contig2368	contig2368	NA	NA	NA	root (UID1)	5656	56	24	56	0	0	0	0	0	0	0	0	32196	68	5210688	29433624	68	7
NOR_Tryc_subflye_sample06	tryc	subflye	sample06	NOR	flye	sub	tryc_subflye_sample06_contig2375	contig2375	NA	NA	NA	root (UID1)	5656	56	24	56	0	0	0	0	0	0	0	0	1957	68	5210688	29433624	68	7
NOR_Tryc_subflye_sample06	tryc	subflye	sample06	NOR	flye	sub	tryc_subflye_sample06_contig2380	contig2380	NA	NA	NA	k__Bacteria (UID203)	5449	103	57	99	4	0	0	0	0	1.06	0	0	41505	68	5210688	29433624	68	7
NOR_Tryc_subflye_sample06	tryc	subflye	sample06	NOR	flye	sub	tryc_subflye_sample06_contig2391	contig2391	NA	NA	NA	root (UID1)	5656	56	24	56	0	0	0	0	0	0	0	0	2999	68	5210688	29433624	68	7
NOR_Tryc_subflye_sample06	tryc	subflye	sample06	NOR	flye	sub	tryc_subflye_sample06_contig2392	contig2392	NA	NA	NA	root (UID1)	5656	56	24	56	0	0	0	0	0	0	0	0	15610	68	5210688	29433624	68	7
NOR_Tryc_subflye_sample06	tryc	subflye	sample06	NOR	flye	sub	tryc_subflye_sample06_contig2399	contig2399	NA	NA	NA	root (UID1)	5656	56	24	56	0	0	0	0	0	0	0	0	3163	68	5210688	29433624	68	7
NOR_Tryc_subflye_sample06	tryc	subflye	sample06	NOR	flye	sub	tryc_subflye_sample06_contig2407	contig2407	NA	NA	NA	root (UID1)	5656	56	24	56	0	0	0	0	0	0	0	0	10562	68	5210688	29433624	68	7
NOR_Tryc_subflye_sample06	tryc	subflye	sample06	NOR	flye	sub	tryc_subflye_sample06_contig2416	contig2416	NA	NA	NA	root (UID1)	5656	56	24	56	0	0	0	0	0	0	0	0	9934	68	5210688	29433624	68	7
NOR_Tryc_subflye_sample06	tryc	subflye	sample06	NOR	flye	sub	tryc_subflye_sample06_contig2418	contig2418	NA	NA	NA	root (UID1)	5656	56	24	56	0	0	0	0	0	0	0	0	78233	68	5210688	29433624	68	7
NOR_Tryc_subflye_sample06	tryc	subflye	sample06	NOR	flye	sub	tryc_subflye_sample06_contig2419	contig2419	NA	NA	NA	root (UID1)	5656	56	24	56	0	0	0	0	0	0	0	0	10966	68	5210688	29433624	68	7
NOR_Tryc_subflye_sample06	tryc	subflye	sample06	NOR	flye	sub	tryc_subflye_sample06_contig2420	contig2420	NA	NA	NA	root (UID1)	5656	56	24	56	0	0	0	0	0	0	0	0	39563	68	5210688	29433624	68	7
NOR_Tryc_subflye_sample06	tryc	subflye	sample06	NOR	flye	sub	tryc_subflye_sample06_contig2422	contig2422	NA	NA	NA	root (UID1)	5656	56	24	56	0	0	0	0	0	0	0	0	87874	68	5210688	29433624	68	7
NOR_Tryc_subflye_sample06	tryc	subflye	sample06	NOR	flye	sub	tryc_subflye_sample06_contig27	contig27	d__Bacteria;p__Proteobacteria	d__Bacteria	p__Proteobacteria	f__Rhodobacteraceae (UID3340)	84	568	330	351	217	0	0	0	0	35.3	0	0	3787349	68	5210688	29433624	68	7
NOR_Tryc_subflye_sample06	tryc	subflye	sample06	NOR	flye	sub	tryc_subflye_sample06_contig285	contig285	NA	NA	NA	root (UID1)	5656	56	24	56	0	0	0	0	0	0	0	0	3624	68	5210688	29433624	68	7
NOR_Tryc_subflye_sample06	tryc	subflye	sample06	NOR	flye	sub	tryc_subflye_sample06_contig423	contig423	NA	NA	NA	root (UID1)	5656	56	24	56	0	0	0	0	0	0	0	0	609	68	5210688	29433624	68	7
NOR_Tryc_subflye_sample06	tryc	subflye	sample06	NOR	flye	sub	tryc_subflye_sample06_contig46	contig46	d__Bacteria;p__Actinobacteriota	d__Bacteria	p__Actinobacteriota	g__Mycobacterium (UID1816)	100	693	300	105	586	2	0	0	0	84.51	0.67	0	5210688	68	5210688	29433624	68	7
NOR_Tryc_subflye_sample06	tryc	subflye	sample06	NOR	flye	sub	tryc_subflye_sample06_contig5	contig5	d__Bacteria;p__Proteobacteria	d__Bacteria	p__Proteobacteria	c__Gammaproteobacteria (UID4201)	1164	275	174	45	230	0	0	0	0	80.07	0	0	2641866	68	5210688	29433624	68	7
NOR_Tryc_subflye_sample06	tryc	subflye	sample06	NOR	flye	sub	tryc_subflye_sample06_contig515	contig515	d__Bacteria;p__Bacteroidota	d__Bacteria	p__Bacteroidota	p__Bacteroidetes (UID2591)	364	303	203	92	206	5	0	0	0	66.15	1.56	0	3960408	68	5210688	29433624	68	7
NOR_Tryc_subflye_sample06	tryc	subflye	sample06	NOR	flye	sub	tryc_subflye_sample06_contig52	contig52	NA	NA	NA	root (UID1)	5656	56	24	56	0	0	0	0	0	0	0	0	3376	68	5210688	29433624	68	7
NOR_Tryc_subflye_sample06	tryc	subflye	sample06	NOR	flye	sub	tryc_subflye_sample06_contig587	contig587	NA	NA	NA	root (UID1)	5656	56	24	56	0	0	0	0	0	0	0	0	7398	68	5210688	29433624	68	7
NOR_Tryc_subflye_sample06	tryc	subflye	sample06	NOR	flye	sub	tryc_subflye_sample06_contig877	contig877	NA	NA	NA	root (UID1)	5656	56	24	56	0	0	0	0	0	0	0	0	36274	68	5210688	29433624	68	7
NOR_Tryc_subflye_sample06	tryc	subflye	sample06	NOR	flye	sub	tryc_subflye_sample06_contig90	contig90	d__Bacteria;p__Bacteroidota	d__Bacteria	p__Bacteroidota	o__Cytophagales (UID2936)	47	454	336	90	360	4	0	0	0	76.49	0.99	0	4520951	68	5210688	29433624	68	7
NOR_Tryc_subflye_sample06	tryc	subflye	sample06	NOR	flye	sub	tryc_subflye_sample06_contig939	contig939	NA	NA	NA	root (UID1)	5656	56	24	56	0	0	0	0	0	0	0	0	19328	68	5210688	29433624	68	7
NOR_Tryc_subflye_sample06	tryc	subflye	sample06	NOR	flye	sub	tryc_subflye_sample06_contig970	contig970	NA	NA	NA	root (UID1)	5656	56	24	56	0	0	0	0	0	0	0	0	17553	68	5210688	29433624	68	7
NOR_Tryc_subflye_sample06	tryc	subflye	sample06	NOR	flye	sub	tryc_subflye_sample06_contig973	contig973	NA	NA	NA	root (UID1)	5656	56	24	56	0	0	0	0	0	0	0	0	8841	68	5210688	29433624	68	7
NOR_Tryc_subflye_sample07	tryc	subflye	sample07	NOR	flye	sub	tryc_subflye_sample07_contig1088	contig1088	NA	NA	NA	root (UID1)	5656	56	24	56	0	0	0	0	0	0	0	0	21069	71	4520789	16614260	71	4
NOR_Tryc_subflye_sample07	tryc	subflye	sample07	NOR	flye	sub	tryc_subflye_sample07_contig11	contig11	d__Bacteria;p__Bacteroidota	d__Bacteria	p__Bacteroidota	o__Cytophagales (UID2936)	47	454	336	79	368	6	1	0	0	81.34	1.85	0	4115156	71	4520789	16614260	71	4
NOR_Tryc_subflye_sample07	tryc	subflye	sample07	NOR	flye	sub	tryc_subflye_sample07_contig110	contig110	NA	NA	NA	root (UID1)	5656	56	24	56	0	0	0	0	0	0	0	0	115446	71	4520789	16614260	71	4
NOR_Tryc_subflye_sample07	tryc	subflye	sample07	NOR	flye	sub	tryc_subflye_sample07_contig1166	contig1166	NA	NA	NA	root (UID1)	5656	56	24	56	0	0	0	0	0	0	0	0	6845	71	4520789	16614260	71	4
NOR_Tryc_subflye_sample07	tryc	subflye	sample07	NOR	flye	sub	tryc_subflye_sample07_contig1220	contig1220	NA	NA	NA	root (UID1)	5656	56	24	56	0	0	0	0	0	0	0	0	1310	71	4520789	16614260	71	4
NOR_Tryc_subflye_sample07	tryc	subflye	sample07	NOR	flye	sub	tryc_subflye_sample07_contig1268	contig1268	NA	NA	NA	root (UID1)	5656	56	24	56	0	0	0	0	0	0	0	0	7382	71	4520789	16614260	71	4
NOR_Tryc_subflye_sample07	tryc	subflye	sample07	NOR	flye	sub	tryc_subflye_sample07_contig1269	contig1269	NA	NA	NA	root (UID1)	5656	56	24	56	0	0	0	0	0	0	0	0	5920	71	4520789	16614260	71	4
NOR_Tryc_subflye_sample07	tryc	subflye	sample07	NOR	flye	sub	tryc_subflye_sample07_contig1271	contig1271	NA	NA	NA	root (UID1)	5656	56	24	56	0	0	0	0	0	0	0	0	4997	71	4520789	16614260	71	4
NOR_Tryc_subflye_sample07	tryc	subflye	sample07	NOR	flye	sub	tryc_subflye_sample07_contig1338	contig1338	NA	NA	NA	root (UID1)	5656	56	24	56	0	0	0	0	0	0	0	0	40169	71	4520789	16614260	71	4
NOR_Tryc_subflye_sample07	tryc	subflye	sample07	NOR	flye	sub	tryc_subflye_sample07_contig1367	contig1367	NA	NA	NA	root (UID1)	5656	56	24	56	0	0	0	0	0	0	0	0	6621	71	4520789	16614260	71	4
NOR_Tryc_subflye_sample07	tryc	subflye	sample07	NOR	flye	sub	tryc_subflye_sample07_contig1566	contig1566	NA	NA	NA	root (UID1)	5656	56	24	56	0	0	0	0	0	0	0	0	2398	71	4520789	16614260	71	4
NOR_Tryc_subflye_sample07	tryc	subflye	sample07	NOR	flye	sub	tryc_subflye_sample07_contig1838	contig1838	NA	NA	NA	root (UID1)	5656	56	24	56	0	0	0	0	0	0	0	0	874	71	4520789	16614260	71	4
NOR_Tryc_subflye_sample07	tryc	subflye	sample07	NOR	flye	sub	tryc_subflye_sample07_contig1881	contig1881	NA	NA	NA	root (UID1)	5656	56	24	56	0	0	0	0	0	0	0	0	2541	71	4520789	16614260	71	4
NOR_Tryc_subflye_sample07	tryc	subflye	sample07	NOR	flye	sub	tryc_subflye_sample07_contig1895	contig1895	NA	NA	NA	root (UID1)	5656	56	24	56	0	0	0	0	0	0	0	0	1995	71	4520789	16614260	71	4
NOR_Tryc_subflye_sample07	tryc	subflye	sample07	NOR	flye	sub	tryc_subflye_sample07_contig1956	contig1956	NA	NA	NA	root (UID1)	5656	56	24	56	0	0	0	0	0	0	0	0	4112	71	4520789	16614260	71	4
NOR_Tryc_subflye_sample07	tryc	subflye	sample07	NOR	flye	sub	tryc_subflye_sample07_contig2021	contig2021	NA	NA	NA	root (UID1)	5656	56	24	56	0	0	0	0	0	0	0	0	5107	71	4520789	16614260	71	4
NOR_Tryc_subflye_sample07	tryc	subflye	sample07	NOR	flye	sub	tryc_subflye_sample07_contig2022	contig2022	NA	NA	NA	root (UID1)	5656	56	24	56	0	0	0	0	0	0	0	0	5161	71	4520789	16614260	71	4
NOR_Tryc_subflye_sample07	tryc	subflye	sample07	NOR	flye	sub	tryc_subflye_sample07_contig2085	contig2085	NA	NA	NA	root (UID1)	5656	56	24	56	0	0	0	0	0	0	0	0	3631	71	4520789	16614260	71	4
NOR_Tryc_subflye_sample07	tryc	subflye	sample07	NOR	flye	sub	tryc_subflye_sample07_contig2148	contig2148	NA	NA	NA	root (UID1)	5656	56	24	56	0	0	0	0	0	0	0	0	2735	71	4520789	16614260	71	4
NOR_Tryc_subflye_sample07	tryc	subflye	sample07	NOR	flye	sub	tryc_subflye_sample07_contig2328	contig2328	NA	NA	NA	root (UID1)	5656	56	24	56	0	0	0	0	0	0	0	0	1950	71	4520789	16614260	71	4
NOR_Tryc_subflye_sample07	tryc	subflye	sample07	NOR	flye	sub	tryc_subflye_sample07_contig2335	contig2335	NA	NA	NA	root (UID1)	5656	56	24	56	0	0	0	0	0	0	0	0	43108	71	4520789	16614260	71	4
NOR_Tryc_subflye_sample07	tryc	subflye	sample07	NOR	flye	sub	tryc_subflye_sample07_contig2341	contig2341	NA	NA	NA	root (UID1)	5656	56	24	56	0	0	0	0	0	0	0	0	2998	71	4520789	16614260	71	4
NOR_Tryc_subflye_sample07	tryc	subflye	sample07	NOR	flye	sub	tryc_subflye_sample07_contig2344	contig2344	NA	NA	NA	root (UID1)	5656	56	24	56	0	0	0	0	0	0	0	0	2227	71	4520789	16614260	71	4
NOR_Tryc_subflye_sample07	tryc	subflye	sample07	NOR	flye	sub	tryc_subflye_sample07_contig2348	contig2348	NA	NA	NA	root (UID1)	5656	56	24	56	0	0	0	0	0	0	0	0	11099	71	4520789	16614260	71	4
NOR_Tryc_subflye_sample07	tryc	subflye	sample07	NOR	flye	sub	tryc_subflye_sample07_contig2349	contig2349	NA	NA	NA	root (UID1)	5656	56	24	56	0	0	0	0	0	0	0	0	1969	71	4520789	16614260	71	4
NOR_Tryc_subflye_sample07	tryc	subflye	sample07	NOR	flye	sub	tryc_subflye_sample07_contig2350	contig2350	NA	NA	NA	root (UID1)	5656	56	24	56	0	0	0	0	0	0	0	0	2999	71	4520789	16614260	71	4
NOR_Tryc_subflye_sample07	tryc	subflye	sample07	NOR	flye	sub	tryc_subflye_sample07_contig2365	contig2365	NA	NA	NA	root (UID1)	5656	56	24	56	0	0	0	0	0	0	0	0	19344	71	4520789	16614260	71	4
NOR_Tryc_subflye_sample07	tryc	subflye	sample07	NOR	flye	sub	tryc_subflye_sample07_contig2372	contig2372	NA	NA	NA	k__Bacteria (UID203)	5449	104	58	102	2	0	0	0	0	1.02	0	0	41480	71	4520789	16614260	71	4
NOR_Tryc_subflye_sample07	tryc	subflye	sample07	NOR	flye	sub	tryc_subflye_sample07_contig2394	contig2394	NA	NA	NA	root (UID1)	5656	56	24	56	0	0	0	0	0	0	0	0	8158	71	4520789	16614260	71	4
NOR_Tryc_subflye_sample07	tryc	subflye	sample07	NOR	flye	sub	tryc_subflye_sample07_contig2396	contig2396	NA	NA	NA	root (UID1)	5656	56	24	56	0	0	0	0	0	0	0	0	3183	71	4520789	16614260	71	4
NOR_Tryc_subflye_sample07	tryc	subflye	sample07	NOR	flye	sub	tryc_subflye_sample07_contig2401	contig2401	NA	NA	NA	root (UID1)	5656	56	24	56	0	0	0	0	0	0	0	0	10931	71	4520789	16614260	71	4
NOR_Tryc_subflye_sample07	tryc	subflye	sample07	NOR	flye	sub	tryc_subflye_sample07_contig2413	contig2413	NA	NA	NA	root (UID1)	5656	56	24	56	0	0	0	0	0	0	0	0	8189	71	4520789	16614260	71	4
NOR_Tryc_subflye_sample07	tryc	subflye	sample07	NOR	flye	sub	tryc_subflye_sample07_contig2414	contig2414	NA	NA	NA	root (UID1)	5656	56	24	56	0	0	0	0	0	0	0	0	20293	71	4520789	16614260	71	4
NOR_Tryc_subflye_sample07	tryc	subflye	sample07	NOR	flye	sub	tryc_subflye_sample07_contig2416	contig2416	NA	NA	NA	root (UID1)	5656	56	24	56	0	0	0	0	0	0	0	0	21017	71	4520789	16614260	71	4
NOR_Tryc_subflye_sample07	tryc	subflye	sample07	NOR	flye	sub	tryc_subflye_sample07_contig2419	contig2419	NA	NA	NA	root (UID1)	5656	56	24	56	0	0	0	0	0	0	0	0	7844	71	4520789	16614260	71	4
NOR_Tryc_subflye_sample07	tryc	subflye	sample07	NOR	flye	sub	tryc_subflye_sample07_contig2422	contig2422	NA	NA	NA	root (UID1)	5656	56	24	56	0	0	0	0	0	0	0	0	20077	71	4520789	16614260	71	4
NOR_Tryc_subflye_sample07	tryc	subflye	sample07	NOR	flye	sub	tryc_subflye_sample07_contig2423	contig2423	NA	NA	NA	root (UID1)	5656	56	24	56	0	0	0	0	0	0	0	0	15591	71	4520789	16614260	71	4
NOR_Tryc_subflye_sample07	tryc	subflye	sample07	NOR	flye	sub	tryc_subflye_sample07_contig2425	contig2425	NA	NA	NA	root (UID1)	5656	56	24	56	0	0	0	0	0	0	0	0	5550	71	4520789	16614260	71	4
NOR_Tryc_subflye_sample07	tryc	subflye	sample07	NOR	flye	sub	tryc_subflye_sample07_contig2426	contig2426	NA	NA	NA	root (UID1)	5656	56	24	56	0	0	0	0	0	0	0	0	5399	71	4520789	16614260	71	4
NOR_Tryc_subflye_sample07	tryc	subflye	sample07	NOR	flye	sub	tryc_subflye_sample07_contig2427	contig2427	NA	NA	NA	root (UID1)	5656	56	24	56	0	0	0	0	0	0	0	0	36258	71	4520789	16614260	71	4
NOR_Tryc_subflye_sample07	tryc	subflye	sample07	NOR	flye	sub	tryc_subflye_sample07_contig2431	contig2431	NA	NA	NA	root (UID1)	5656	56	24	56	0	0	0	0	0	0	0	0	17391	71	4520789	16614260	71	4
NOR_Tryc_subflye_sample07	tryc	subflye	sample07	NOR	flye	sub	tryc_subflye_sample07_contig2437	contig2437	NA	NA	NA	root (UID1)	5656	56	24	56	0	0	0	0	0	0	0	0	21991	71	4520789	16614260	71	4
NOR_Tryc_subflye_sample07	tryc	subflye	sample07	NOR	flye	sub	tryc_subflye_sample07_contig2438	contig2438	NA	NA	NA	root (UID1)	5656	56	24	56	0	0	0	0	0	0	0	0	39563	71	4520789	16614260	71	4
NOR_Tryc_subflye_sample07	tryc	subflye	sample07	NOR	flye	sub	tryc_subflye_sample07_contig2439	contig2439	NA	NA	NA	root (UID1)	5656	56	24	56	0	0	0	0	0	0	0	0	78126	71	4520789	16614260	71	4
NOR_Tryc_subflye_sample07	tryc	subflye	sample07	NOR	flye	sub	NA	contig244	NA	NA	NA	NA	NA	NA	NA	NA	NA	NA	NA	NA	NA	NA	NA	NA	956	71	4520789	16614260	71	4
NOR_Tryc_subflye_sample07	tryc	subflye	sample07	NOR	flye	sub	tryc_subflye_sample07_contig314	contig314	NA	NA	NA	root (UID1)	5656	56	24	56	0	0	0	0	0	0	0	0	5365	71	4520789	16614260	71	4
NOR_Tryc_subflye_sample07	tryc	subflye	sample07	NOR	flye	sub	tryc_subflye_sample07_contig399	contig399	NA	NA	NA	root (UID1)	5656	56	24	56	0	0	0	0	0	0	0	0	1676	71	4520789	16614260	71	4
NOR_Tryc_subflye_sample07	tryc	subflye	sample07	NOR	flye	sub	tryc_subflye_sample07_contig414	contig414	NA	NA	NA	root (UID1)	5656	56	24	56	0	0	0	0	0	0	0	0	8827	71	4520789	16614260	71	4
NOR_Tryc_subflye_sample07	tryc	subflye	sample07	NOR	flye	sub	tryc_subflye_sample07_contig421	contig421	NA	NA	NA	root (UID1)	5656	56	24	56	0	0	0	0	0	0	0	0	2889	71	4520789	16614260	71	4
NOR_Tryc_subflye_sample07	tryc	subflye	sample07	NOR	flye	sub	tryc_subflye_sample07_contig426	contig426	NA	NA	NA	root (UID1)	5656	56	24	56	0	0	0	0	0	0	0	0	12991	71	4520789	16614260	71	4
NOR_Tryc_subflye_sample07	tryc	subflye	sample07	NOR	flye	sub	tryc_subflye_sample07_contig430	contig430	NA	NA	NA	root (UID1)	5656	56	24	56	0	0	0	0	0	0	0	0	5061	71	4520789	16614260	71	4
NOR_Tryc_subflye_sample07	tryc	subflye	sample07	NOR	flye	sub	tryc_subflye_sample07_contig459	contig459	NA	NA	NA	root (UID1)	5656	56	24	56	0	0	0	0	0	0	0	0	1476	71	4520789	16614260	71	4
NOR_Tryc_subflye_sample07	tryc	subflye	sample07	NOR	flye	sub	tryc_subflye_sample07_contig464	contig464	NA	NA	NA	root (UID1)	5656	56	24	56	0	0	0	0	0	0	0	0	3663	71	4520789	16614260	71	4
NOR_Tryc_subflye_sample07	tryc	subflye	sample07	NOR	flye	sub	tryc_subflye_sample07_contig483	contig483	NA	NA	NA	root (UID1)	5656	56	24	56	0	0	0	0	0	0	0	0	5714	71	4520789	16614260	71	4
NOR_Tryc_subflye_sample07	tryc	subflye	sample07	NOR	flye	sub	tryc_subflye_sample07_contig494	contig494	NA	NA	NA	root (UID1)	5656	56	24	56	0	0	0	0	0	0	0	0	4291	71	4520789	16614260	71	4
NOR_Tryc_subflye_sample07	tryc	subflye	sample07	NOR	flye	sub	tryc_subflye_sample07_contig509	contig509	NA	NA	NA	root (UID1)	5656	56	24	56	0	0	0	0	0	0	0	0	6581	71	4520789	16614260	71	4
NOR_Tryc_subflye_sample07	tryc	subflye	sample07	NOR	flye	sub	tryc_subflye_sample07_contig513	contig513	NA	NA	NA	root (UID1)	5656	56	24	56	0	0	0	0	0	0	0	0	3885	71	4520789	16614260	71	4
NOR_Tryc_subflye_sample07	tryc	subflye	sample07	NOR	flye	sub	tryc_subflye_sample07_contig528	contig528	NA	NA	NA	root (UID1)	5656	56	24	56	0	0	0	0	0	0	0	0	3678	71	4520789	16614260	71	4
NOR_Tryc_subflye_sample07	tryc	subflye	sample07	NOR	flye	sub	tryc_subflye_sample07_contig532	contig532	NA	NA	NA	root (UID1)	5656	56	24	56	0	0	0	0	0	0	0	0	16906	71	4520789	16614260	71	4
NOR_Tryc_subflye_sample07	tryc	subflye	sample07	NOR	flye	sub	tryc_subflye_sample07_contig536	contig536	NA	NA	NA	root (UID1)	5656	56	24	56	0	0	0	0	0	0	0	0	42421	71	4520789	16614260	71	4
NOR_Tryc_subflye_sample07	tryc	subflye	sample07	NOR	flye	sub	tryc_subflye_sample07_contig557	contig557	NA	NA	NA	root (UID1)	5656	56	24	56	0	0	0	0	0	0	0	0	58007	71	4520789	16614260	71	4
NOR_Tryc_subflye_sample07	tryc	subflye	sample07	NOR	flye	sub	tryc_subflye_sample07_contig559	contig559	NA	NA	NA	root (UID1)	5656	56	24	56	0	0	0	0	0	0	0	0	9144	71	4520789	16614260	71	4
NOR_Tryc_subflye_sample07	tryc	subflye	sample07	NOR	flye	sub	tryc_subflye_sample07_contig6	contig6	d__Bacteria;p__Proteobacteria	d__Bacteria	p__Proteobacteria	c__Gammaproteobacteria (UID4201)	1164	275	174	50	225	0	0	0	0	77.43	0	0	2641827	71	4520789	16614260	71	4
NOR_Tryc_subflye_sample07	tryc	subflye	sample07	NOR	flye	sub	tryc_subflye_sample07_contig707	contig707	NA	NA	NA	root (UID1)	5656	56	24	56	0	0	0	0	0	0	0	0	10913	71	4520789	16614260	71	4
NOR_Tryc_subflye_sample07	tryc	subflye	sample07	NOR	flye	sub	tryc_subflye_sample07_contig71	contig71	d__Bacteria;p__Bacteroidota	d__Bacteria	p__Bacteroidota	o__Cytophagales (UID2936)	47	454	336	90	360	4	0	0	0	77	0.99	0	4520789	71	4520789	16614260	71	4
NOR_Tryc_subflye_sample07	tryc	subflye	sample07	NOR	flye	sub	tryc_subflye_sample07_contig728	contig728	NA	NA	NA	root (UID1)	5656	56	24	56	0	0	0	0	0	0	0	0	184171	71	4520789	16614260	71	4
NOR_Tryc_subflye_sample07	tryc	subflye	sample07	NOR	flye	sub	tryc_subflye_sample07_contig731	contig731	NA	NA	NA	root (UID1)	5656	56	24	56	0	0	0	0	0	0	0	0	87909	71	4520789	16614260	71	4
NOR_Tryc_subflye_sample07	tryc	subflye	sample07	NOR	flye	sub	tryc_subflye_sample07_contig889	contig889	NA	NA	NA	root (UID1)	5656	56	24	56	0	0	0	0	0	0	0	0	31767	71	4520789	16614260	71	4
NOR_Tryc_subflye_sample07	tryc	subflye	sample07	NOR	flye	sub	tryc_subflye_sample07_contig93	contig93	NA	NA	NA	root (UID1)	5656	56	24	56	0	0	0	0	0	0	0	0	31252	71	4520789	16614260	71	4
NOR_Tryc_subflye_sample07	tryc	subflye	sample07	NOR	flye	sub	tryc_subflye_sample07_contig943	contig943	NA	NA	NA	root (UID1)	5656	56	24	56	0	0	0	0	0	0	0	0	5792	71	4520789	16614260	71	4
NOR_Tryc_subflye_sample07	tryc	subflye	sample07	NOR	flye	sub	tryc_subflye_sample07_contig96	contig96	d__Bacteria;p__Nitrospirota	d__Bacteria	p__Nitrospirota	k__Bacteria (UID3187)	2258	181	110	40	139	2	0	0	0	71.74	1.09	0	4106105	71	4520789	16614260	71	4
NOR_Tryc_subflye_sample08	tryc	subflye	sample08	NOR	flye	sub	tryc_subflye_sample08_contig1037	contig1037	NA	NA	NA	root (UID1)	5656	56	24	56	0	0	0	0	0	0	0	0	4538	67	5207281	25992239	67	6
NOR_Tryc_subflye_sample08	tryc	subflye	sample08	NOR	flye	sub	tryc_subflye_sample08_contig107	contig107	NA	NA	NA	root (UID1)	5656	56	24	56	0	0	0	0	0	0	0	0	3635	67	5207281	25992239	67	6
NOR_Tryc_subflye_sample08	tryc	subflye	sample08	NOR	flye	sub	tryc_subflye_sample08_contig1122	contig1122	NA	NA	NA	root (UID1)	5656	56	24	56	0	0	0	0	0	0	0	0	42144	67	5207281	25992239	67	6
NOR_Tryc_subflye_sample08	tryc	subflye	sample08	NOR	flye	sub	tryc_subflye_sample08_contig135	contig135	NA	NA	NA	root (UID1)	5656	56	24	56	0	0	0	0	0	0	0	0	120234	67	5207281	25992239	67	6
NOR_Tryc_subflye_sample08	tryc	subflye	sample08	NOR	flye	sub	tryc_subflye_sample08_contig1428	contig1428	NA	NA	NA	root (UID1)	5656	56	24	56	0	0	0	0	0	0	0	0	503	67	5207281	25992239	67	6
NOR_Tryc_subflye_sample08	tryc	subflye	sample08	NOR	flye	sub	tryc_subflye_sample08_contig1432	contig1432	NA	NA	NA	root (UID1)	5656	56	24	56	0	0	0	0	0	0	0	0	7830	67	5207281	25992239	67	6
NOR_Tryc_subflye_sample08	tryc	subflye	sample08	NOR	flye	sub	tryc_subflye_sample08_contig1451	contig1451	NA	NA	NA	root (UID1)	5656	56	24	56	0	0	0	0	0	0	0	0	545	67	5207281	25992239	67	6
NOR_Tryc_subflye_sample08	tryc	subflye	sample08	NOR	flye	sub	tryc_subflye_sample08_contig1651	contig1651	NA	NA	NA	root (UID1)	5656	56	24	56	0	0	0	0	0	0	0	0	3683	67	5207281	25992239	67	6
NOR_Tryc_subflye_sample08	tryc	subflye	sample08	NOR	flye	sub	tryc_subflye_sample08_contig1741	contig1741	NA	NA	NA	root (UID1)	5656	56	24	56	0	0	0	0	0	0	0	0	36274	67	5207281	25992239	67	6
NOR_Tryc_subflye_sample08	tryc	subflye	sample08	NOR	flye	sub	tryc_subflye_sample08_contig1744	contig1744	NA	NA	NA	root (UID1)	5656	56	24	56	0	0	0	0	0	0	0	0	5256	67	5207281	25992239	67	6
NOR_Tryc_subflye_sample08	tryc	subflye	sample08	NOR	flye	sub	tryc_subflye_sample08_contig1782	contig1782	NA	NA	NA	root (UID1)	5656	56	24	56	0	0	0	0	0	0	0	0	2541	67	5207281	25992239	67	6
NOR_Tryc_subflye_sample08	tryc	subflye	sample08	NOR	flye	sub	tryc_subflye_sample08_contig1787	contig1787	NA	NA	NA	root (UID1)	5656	56	24	56	0	0	0	0	0	0	0	0	29552	67	5207281	25992239	67	6
NOR_Tryc_subflye_sample08	tryc	subflye	sample08	NOR	flye	sub	tryc_subflye_sample08_contig1880	contig1880	NA	NA	NA	root (UID1)	5656	56	24	56	0	0	0	0	0	0	0	0	4167	67	5207281	25992239	67	6
NOR_Tryc_subflye_sample08	tryc	subflye	sample08	NOR	flye	sub	tryc_subflye_sample08_contig194	contig194	d__Bacteria;p__Bacteroidota	d__Bacteria	p__Bacteroidota	p__Bacteroidetes (UID2591)	364	303	203	93	203	7	0	0	0	63.68	1.51	0	3960182	67	5207281	25992239	67	6
NOR_Tryc_subflye_sample08	tryc	subflye	sample08	NOR	flye	sub	tryc_subflye_sample08_contig1948	contig1948	NA	NA	NA	root (UID1)	5656	56	24	56	0	0	0	0	0	0	0	0	3640	67	5207281	25992239	67	6
NOR_Tryc_subflye_sample08	tryc	subflye	sample08	NOR	flye	sub	tryc_subflye_sample08_contig1950	contig1950	NA	NA	NA	root (UID1)	5656	56	24	56	0	0	0	0	0	0	0	0	21052	67	5207281	25992239	67	6
NOR_Tryc_subflye_sample08	tryc	subflye	sample08	NOR	flye	sub	tryc_subflye_sample08_contig1970	contig1970	NA	NA	NA	root (UID1)	5656	56	24	56	0	0	0	0	0	0	0	0	5161	67	5207281	25992239	67	6
NOR_Tryc_subflye_sample08	tryc	subflye	sample08	NOR	flye	sub	tryc_subflye_sample08_contig2002	contig2002	NA	NA	NA	root (UID1)	5656	56	24	56	0	0	0	0	0	0	0	0	5926	67	5207281	25992239	67	6
NOR_Tryc_subflye_sample08	tryc	subflye	sample08	NOR	flye	sub	tryc_subflye_sample08_contig2021	contig2021	NA	NA	NA	root (UID1)	5656	56	24	56	0	0	0	0	0	0	0	0	4102	67	5207281	25992239	67	6
NOR_Tryc_subflye_sample08	tryc	subflye	sample08	NOR	flye	sub	tryc_subflye_sample08_contig2040	contig2040	NA	NA	NA	root (UID1)	5656	56	24	56	0	0	0	0	0	0	0	0	6575	67	5207281	25992239	67	6
NOR_Tryc_subflye_sample08	tryc	subflye	sample08	NOR	flye	sub	tryc_subflye_sample08_contig205	contig205	NA	NA	NA	root (UID1)	5656	56	24	56	0	0	0	0	0	0	0	0	9176	67	5207281	25992239	67	6
NOR_Tryc_subflye_sample08	tryc	subflye	sample08	NOR	flye	sub	tryc_subflye_sample08_contig2073	contig2073	NA	NA	NA	root (UID1)	5656	56	24	56	0	0	0	0	0	0	0	0	3063	67	5207281	25992239	67	6
NOR_Tryc_subflye_sample08	tryc	subflye	sample08	NOR	flye	sub	tryc_subflye_sample08_contig2074	contig2074	NA	NA	NA	root (UID1)	5656	56	24	56	0	0	0	0	0	0	0	0	3741	67	5207281	25992239	67	6
NOR_Tryc_subflye_sample08	tryc	subflye	sample08	NOR	flye	sub	tryc_subflye_sample08_contig2086	contig2086	NA	NA	NA	root (UID1)	5656	56	24	56	0	0	0	0	0	0	0	0	15440	67	5207281	25992239	67	6
NOR_Tryc_subflye_sample08	tryc	subflye	sample08	NOR	flye	sub	tryc_subflye_sample08_contig2087	contig2087	NA	NA	NA	root (UID1)	5656	56	24	56	0	0	0	0	0	0	0	0	7815	67	5207281	25992239	67	6
NOR_Tryc_subflye_sample08	tryc	subflye	sample08	NOR	flye	sub	tryc_subflye_sample08_contig2089	contig2089	NA	NA	NA	root (UID1)	5656	56	24	56	0	0	0	0	0	0	0	0	19294	67	5207281	25992239	67	6
NOR_Tryc_subflye_sample08	tryc	subflye	sample08	NOR	flye	sub	tryc_subflye_sample08_contig2188	contig2188	NA	NA	NA	root (UID1)	5656	56	24	56	0	0	0	0	0	0	0	0	1676	67	5207281	25992239	67	6
NOR_Tryc_subflye_sample08	tryc	subflye	sample08	NOR	flye	sub	tryc_subflye_sample08_contig2270	contig2270	NA	NA	NA	root (UID1)	5656	56	24	56	0	0	0	0	0	0	0	0	20992	67	5207281	25992239	67	6
NOR_Tryc_subflye_sample08	tryc	subflye	sample08	NOR	flye	sub	tryc_subflye_sample08_contig2285	contig2285	NA	NA	NA	root (UID1)	5656	56	24	56	0	0	0	0	0	0	0	0	31702	67	5207281	25992239	67	6
NOR_Tryc_subflye_sample08	tryc	subflye	sample08	NOR	flye	sub	tryc_subflye_sample08_contig2292	contig2292	NA	NA	NA	root (UID1)	5656	56	24	56	0	0	0	0	0	0	0	0	197058	67	5207281	25992239	67	6
NOR_Tryc_subflye_sample08	tryc	subflye	sample08	NOR	flye	sub	tryc_subflye_sample08_contig2303	contig2303	NA	NA	NA	root (UID1)	5656	56	24	56	0	0	0	0	0	0	0	0	2620	67	5207281	25992239	67	6
NOR_Tryc_subflye_sample08	tryc	subflye	sample08	NOR	flye	sub	tryc_subflye_sample08_contig2304	contig2304	NA	NA	NA	root (UID1)	5656	56	24	56	0	0	0	0	0	0	0	0	25592	67	5207281	25992239	67	6
NOR_Tryc_subflye_sample08	tryc	subflye	sample08	NOR	flye	sub	tryc_subflye_sample08_contig2311	contig2311	NA	NA	NA	root (UID1)	5656	56	24	56	0	0	0	0	0	0	0	0	10847	67	5207281	25992239	67	6
NOR_Tryc_subflye_sample08	tryc	subflye	sample08	NOR	flye	sub	tryc_subflye_sample08_contig2313	contig2313	NA	NA	NA	root (UID1)	5656	56	24	56	0	0	0	0	0	0	0	0	32153	67	5207281	25992239	67	6
NOR_Tryc_subflye_sample08	tryc	subflye	sample08	NOR	flye	sub	tryc_subflye_sample08_contig2321	contig2321	NA	NA	NA	root (UID1)	5656	56	24	56	0	0	0	0	0	0	0	0	17368	67	5207281	25992239	67	6
NOR_Tryc_subflye_sample08	tryc	subflye	sample08	NOR	flye	sub	tryc_subflye_sample08_contig2328	contig2328	NA	NA	NA	root (UID1)	5656	56	24	56	0	0	0	0	0	0	0	0	17581	67	5207281	25992239	67	6
NOR_Tryc_subflye_sample08	tryc	subflye	sample08	NOR	flye	sub	tryc_subflye_sample08_contig2333	contig2333	NA	NA	NA	root (UID1)	5656	56	24	56	0	0	0	0	0	0	0	0	4446	67	5207281	25992239	67	6
NOR_Tryc_subflye_sample08	tryc	subflye	sample08	NOR	flye	sub	tryc_subflye_sample08_contig2346	contig2346	NA	NA	NA	root (UID1)	5656	56	24	56	0	0	0	0	0	0	0	0	5550	67	5207281	25992239	67	6
NOR_Tryc_subflye_sample08	tryc	subflye	sample08	NOR	flye	sub	tryc_subflye_sample08_contig2350	contig2350	NA	NA	NA	root (UID1)	5656	56	24	56	0	0	0	0	0	0	0	0	2997	67	5207281	25992239	67	6
NOR_Tryc_subflye_sample08	tryc	subflye	sample08	NOR	flye	sub	tryc_subflye_sample08_contig2365	contig2365	NA	NA	NA	root (UID1)	5656	56	24	56	0	0	0	0	0	0	0	0	7382	67	5207281	25992239	67	6
NOR_Tryc_subflye_sample08	tryc	subflye	sample08	NOR	flye	sub	tryc_subflye_sample08_contig2378	contig2378	NA	NA	NA	root (UID1)	5656	56	24	56	0	0	0	0	0	0	0	0	3179	67	5207281	25992239	67	6
NOR_Tryc_subflye_sample08	tryc	subflye	sample08	NOR	flye	sub	tryc_subflye_sample08_contig2380	contig2380	NA	NA	NA	root (UID1)	5656	56	24	56	0	0	0	0	0	0	0	0	20282	67	5207281	25992239	67	6
NOR_Tryc_subflye_sample08	tryc	subflye	sample08	NOR	flye	sub	tryc_subflye_sample08_contig2393	contig2393	NA	NA	NA	root (UID1)	5656	56	24	56	0	0	0	0	0	0	0	0	26364	67	5207281	25992239	67	6
NOR_Tryc_subflye_sample08	tryc	subflye	sample08	NOR	flye	sub	tryc_subflye_sample08_contig2396	contig2396	NA	NA	NA	root (UID1)	5656	56	24	56	0	0	0	0	0	0	0	0	78099	67	5207281	25992239	67	6
NOR_Tryc_subflye_sample08	tryc	subflye	sample08	NOR	flye	sub	tryc_subflye_sample08_contig2398	contig2398	NA	NA	NA	root (UID1)	5656	56	24	56	0	0	0	0	0	0	0	0	39537	67	5207281	25992239	67	6
NOR_Tryc_subflye_sample08	tryc	subflye	sample08	NOR	flye	sub	tryc_subflye_sample08_contig2399	contig2399	NA	NA	NA	k__Bacteria (UID203)	5449	103	57	99	4	0	0	0	0	1.55	0	0	41411	67	5207281	25992239	67	6
NOR_Tryc_subflye_sample08	tryc	subflye	sample08	NOR	flye	sub	tryc_subflye_sample08_contig2400	contig2400	NA	NA	NA	root (UID1)	5656	56	24	56	0	0	0	0	0	0	0	0	15428	67	5207281	25992239	67	6
NOR_Tryc_subflye_sample08	tryc	subflye	sample08	NOR	flye	sub	tryc_subflye_sample08_contig255	contig255	NA	NA	NA	root (UID1)	5656	56	24	56	0	0	0	0	0	0	0	0	184410	67	5207281	25992239	67	6
NOR_Tryc_subflye_sample08	tryc	subflye	sample08	NOR	flye	sub	tryc_subflye_sample08_contig310	contig310	NA	NA	NA	root (UID1)	5656	56	24	56	0	0	0	0	0	0	0	0	21340	67	5207281	25992239	67	6
NOR_Tryc_subflye_sample08	tryc	subflye	sample08	NOR	flye	sub	tryc_subflye_sample08_contig324	contig324	d__Bacteria;p__Bacteroidota	d__Bacteria	p__Bacteroidota	o__Cytophagales (UID2936)	47	454	336	82	367	5	0	0	0	80.1	1.19	0	4115340	67	5207281	25992239	67	6
NOR_Tryc_subflye_sample08	tryc	subflye	sample08	NOR	flye	sub	tryc_subflye_sample08_contig34	contig34	d__Bacteria;p__Proteobacteria	d__Bacteria	p__Proteobacteria	c__Gammaproteobacteria (UID4201)	1164	275	174	48	227	0	0	0	0	78.3	0	0	2641806	67	5207281	25992239	67	6
NOR_Tryc_subflye_sample08	tryc	subflye	sample08	NOR	flye	sub	tryc_subflye_sample08_contig386	contig386	NA	NA	NA	root (UID1)	5656	56	24	56	0	0	0	0	0	0	0	0	43100	67	5207281	25992239	67	6
NOR_Tryc_subflye_sample08	tryc	subflye	sample08	NOR	flye	sub	tryc_subflye_sample08_contig486	contig486	NA	NA	NA	root (UID1)	5656	56	24	56	0	0	0	0	0	0	0	0	4887	67	5207281	25992239	67	6
NOR_Tryc_subflye_sample08	tryc	subflye	sample08	NOR	flye	sub	tryc_subflye_sample08_contig546	contig546	NA	NA	NA	root (UID1)	5656	56	24	56	0	0	0	0	0	0	0	0	87869	67	5207281	25992239	67	6
NOR_Tryc_subflye_sample08	tryc	subflye	sample08	NOR	flye	sub	tryc_subflye_sample08_contig614	contig614	NA	NA	NA	root (UID1)	5656	56	24	56	0	0	0	0	0	0	0	0	66225	67	5207281	25992239	67	6
NOR_Tryc_subflye_sample08	tryc	subflye	sample08	NOR	flye	sub	tryc_subflye_sample08_contig67	contig67	d__Bacteria;p__Nitrospirota	d__Bacteria	p__Nitrospirota	k__Bacteria (UID3187)	2258	181	110	36	142	3	0	0	0	76.69	2	0	4106147	67	5207281	25992239	67	6
NOR_Tryc_subflye_sample08	tryc	subflye	sample08	NOR	flye	sub	tryc_subflye_sample08_contig679	contig679	NA	NA	NA	root (UID1)	5656	56	24	56	0	0	0	0	0	0	0	0	3933	67	5207281	25992239	67	6
NOR_Tryc_subflye_sample08	tryc	subflye	sample08	NOR	flye	sub	tryc_subflye_sample08_contig7	contig7	d__Bacteria;p__Actinobacteriota	d__Bacteria	p__Actinobacteriota	g__Mycobacterium (UID1816)	100	693	300	106	586	1	0	0	0	85.25	0.33	0	5207281	67	5207281	25992239	67	6
NOR_Tryc_subflye_sample08	tryc	subflye	sample08	NOR	flye	sub	tryc_subflye_sample08_contig707	contig707	NA	NA	NA	root (UID1)	5656	56	24	56	0	0	0	0	0	0	0	0	4328	67	5207281	25992239	67	6
NOR_Tryc_subflye_sample08	tryc	subflye	sample08	NOR	flye	sub	tryc_subflye_sample08_contig715	contig715	NA	NA	NA	root (UID1)	5656	56	24	56	0	0	0	0	0	0	0	0	5029	67	5207281	25992239	67	6
NOR_Tryc_subflye_sample08	tryc	subflye	sample08	NOR	flye	sub	tryc_subflye_sample08_contig76	contig76	NA	NA	NA	root (UID1)	5656	56	24	56	0	0	0	0	0	0	0	0	9898	67	5207281	25992239	67	6
NOR_Tryc_subflye_sample08	tryc	subflye	sample08	NOR	flye	sub	tryc_subflye_sample08_contig77	contig77	NA	NA	NA	root (UID1)	5656	56	24	56	0	0	0	0	0	0	0	0	2236	67	5207281	25992239	67	6
NOR_Tryc_subflye_sample08	tryc	subflye	sample08	NOR	flye	sub	tryc_subflye_sample08_contig783	contig783	NA	NA	NA	root (UID1)	5656	56	24	56	0	0	0	0	0	0	0	0	16912	67	5207281	25992239	67	6
NOR_Tryc_subflye_sample08	tryc	subflye	sample08	NOR	flye	sub	tryc_subflye_sample08_contig792	contig792	NA	NA	NA	root (UID1)	5656	56	24	56	0	0	0	0	0	0	0	0	6598	67	5207281	25992239	67	6
NOR_Tryc_subflye_sample08	tryc	subflye	sample08	NOR	flye	sub	tryc_subflye_sample08_contig852	contig852	NA	NA	NA	root (UID1)	5656	56	24	56	0	0	0	0	0	0	0	0	8822	67	5207281	25992239	67	6
NOR_Tryc_subflye_sample08	tryc	subflye	sample08	NOR	flye	sub	tryc_subflye_sample08_contig869	contig869	NA	NA	NA	root (UID1)	5656	56	24	56	0	0	0	0	0	0	0	0	6877	67	5207281	25992239	67	6
NOR_Tryc_subflye_sample08	tryc	subflye	sample08	NOR	flye	sub	tryc_subflye_sample08_contig87	contig87	d__Bacteria;p__Bacteroidota	d__Bacteria	p__Bacteroidota	o__Cytophagales (UID2936)	47	454	336	90	360	4	0	0	0	77.63	0.99	0	4520868	67	5207281	25992239	67	6
NOR_Tryc_subflye_sample09	tryc	subflye	sample09	NOR	flye	sub	tryc_subflye_sample09_contig1	contig1	d__Bacteria;p__Actinobacteriota	d__Bacteria	p__Actinobacteriota	g__Mycobacterium (UID1816)	100	693	300	108	584	1	0	0	0	84.2	0.33	0	5210697	71	7169425	33129895	71	7
NOR_Tryc_subflye_sample09	tryc	subflye	sample09	NOR	flye	sub	tryc_subflye_sample09_contig1011	contig1011	NA	NA	NA	root (UID1)	5656	56	24	56	0	0	0	0	0	0	0	0	120218	71	7169425	33129895	71	7
NOR_Tryc_subflye_sample09	tryc	subflye	sample09	NOR	flye	sub	tryc_subflye_sample09_contig1049	contig1049	NA	NA	NA	root (UID1)	5656	56	24	56	0	0	0	0	0	0	0	0	4431	71	7169425	33129895	71	7
NOR_Tryc_subflye_sample09	tryc	subflye	sample09	NOR	flye	sub	tryc_subflye_sample09_contig1185	contig1185	NA	NA	NA	root (UID1)	5656	56	24	56	0	0	0	0	0	0	0	0	8947	71	7169425	33129895	71	7
NOR_Tryc_subflye_sample09	tryc	subflye	sample09	NOR	flye	sub	tryc_subflye_sample09_contig1211	contig1211	NA	NA	NA	root (UID1)	5656	56	24	56	0	0	0	0	0	0	0	0	42404	71	7169425	33129895	71	7
NOR_Tryc_subflye_sample09	tryc	subflye	sample09	NOR	flye	sub	tryc_subflye_sample09_contig1220	contig1220	NA	NA	NA	root (UID1)	5656	56	24	56	0	0	0	0	0	0	0	0	3695	71	7169425	33129895	71	7
NOR_Tryc_subflye_sample09	tryc	subflye	sample09	NOR	flye	sub	tryc_subflye_sample09_contig1312	contig1312	NA	NA	NA	root (UID1)	5656	56	24	56	0	0	0	0	0	0	0	0	4543	71	7169425	33129895	71	7
NOR_Tryc_subflye_sample09	tryc	subflye	sample09	NOR	flye	sub	tryc_subflye_sample09_contig1333	contig1333	NA	NA	NA	root (UID1)	5656	56	24	56	0	0	0	0	0	0	0	0	5844	71	7169425	33129895	71	7
NOR_Tryc_subflye_sample09	tryc	subflye	sample09	NOR	flye	sub	tryc_subflye_sample09_contig1535	contig1535	NA	NA	NA	root (UID1)	5656	56	24	56	0	0	0	0	0	0	0	0	31280	71	7169425	33129895	71	7
NOR_Tryc_subflye_sample09	tryc	subflye	sample09	NOR	flye	sub	tryc_subflye_sample09_contig1536	contig1536	NA	NA	NA	root (UID1)	5656	56	24	56	0	0	0	0	0	0	0	0	3657	71	7169425	33129895	71	7
NOR_Tryc_subflye_sample09	tryc	subflye	sample09	NOR	flye	sub	tryc_subflye_sample09_contig1617	contig1617	NA	NA	NA	root (UID1)	5656	56	24	56	0	0	0	0	0	0	0	0	43107	71	7169425	33129895	71	7
NOR_Tryc_subflye_sample09	tryc	subflye	sample09	NOR	flye	sub	tryc_subflye_sample09_contig177	contig177	d__Bacteria;p__Acidobacteriota	d__Bacteria	p__Acidobacteriota	k__Bacteria (UID3187)	2258	188	117	42	142	4	0	0	0	74.78	1.76	0	7169425	71	7169425	33129895	71	7
NOR_Tryc_subflye_sample09	tryc	subflye	sample09	NOR	flye	sub	tryc_subflye_sample09_contig1843	contig1843	NA	NA	NA	root (UID1)	5656	56	24	56	0	0	0	0	0	0	0	0	740	71	7169425	33129895	71	7
NOR_Tryc_subflye_sample09	tryc	subflye	sample09	NOR	flye	sub	tryc_subflye_sample09_contig1878	contig1878	NA	NA	NA	root (UID1)	5656	56	24	56	0	0	0	0	0	0	0	0	6950	71	7169425	33129895	71	7
NOR_Tryc_subflye_sample09	tryc	subflye	sample09	NOR	flye	sub	tryc_subflye_sample09_contig1899	contig1899	NA	NA	NA	root (UID1)	5656	56	24	56	0	0	0	0	0	0	0	0	1676	71	7169425	33129895	71	7
NOR_Tryc_subflye_sample09	tryc	subflye	sample09	NOR	flye	sub	tryc_subflye_sample09_contig19	contig19	d__Bacteria;p__Proteobacteria	d__Bacteria	p__Proteobacteria	f__Rhodobacteraceae (UID3340)	84	568	330	339	228	1	0	0	0	41.72	0.05	0	3787340	71	7169425	33129895	71	7
NOR_Tryc_subflye_sample09	tryc	subflye	sample09	NOR	flye	sub	tryc_subflye_sample09_contig1916	contig1916	NA	NA	NA	root (UID1)	5656	56	24	56	0	0	0	0	0	0	0	0	4101	71	7169425	33129895	71	7
NOR_Tryc_subflye_sample09	tryc	subflye	sample09	NOR	flye	sub	tryc_subflye_sample09_contig1930	contig1930	NA	NA	NA	root (UID1)	5656	56	24	56	0	0	0	0	0	0	0	0	3715	71	7169425	33129895	71	7
NOR_Tryc_subflye_sample09	tryc	subflye	sample09	NOR	flye	sub	tryc_subflye_sample09_contig1931	contig1931	NA	NA	NA	root (UID1)	5656	56	24	56	0	0	0	0	0	0	0	0	5894	71	7169425	33129895	71	7
NOR_Tryc_subflye_sample09	tryc	subflye	sample09	NOR	flye	sub	tryc_subflye_sample09_contig2003	contig2003	NA	NA	NA	root (UID1)	5656	56	24	56	0	0	0	0	0	0	0	0	4347	71	7169425	33129895	71	7
NOR_Tryc_subflye_sample09	tryc	subflye	sample09	NOR	flye	sub	tryc_subflye_sample09_contig2004	contig2004	NA	NA	NA	root (UID1)	5656	56	24	56	0	0	0	0	0	0	0	0	5050	71	7169425	33129895	71	7
NOR_Tryc_subflye_sample09	tryc	subflye	sample09	NOR	flye	sub	tryc_subflye_sample09_contig208	contig208	NA	NA	NA	root (UID1)	5656	56	24	56	0	0	0	0	0	0	0	0	4869	71	7169425	33129895	71	7
NOR_Tryc_subflye_sample09	tryc	subflye	sample09	NOR	flye	sub	tryc_subflye_sample09_contig214	contig214	d__Bacteria;p__Bacteroidota	d__Bacteria	p__Bacteroidota	o__Cytophagales (UID2936)	47	454	336	95	355	4	0	0	0	76.22	0.75	0	4520793	71	7169425	33129895	71	7
NOR_Tryc_subflye_sample09	tryc	subflye	sample09	NOR	flye	sub	tryc_subflye_sample09_contig2239	contig2239	NA	NA	NA	root (UID1)	5656	56	24	56	0	0	0	0	0	0	0	0	21147	71	7169425	33129895	71	7
NOR_Tryc_subflye_sample09	tryc	subflye	sample09	NOR	flye	sub	tryc_subflye_sample09_contig2265	contig2265	NA	NA	NA	root (UID1)	5656	56	24	56	0	0	0	0	0	0	0	0	3651	71	7169425	33129895	71	7
NOR_Tryc_subflye_sample09	tryc	subflye	sample09	NOR	flye	sub	tryc_subflye_sample09_contig2280	contig2280	NA	NA	NA	root (UID1)	5656	56	24	56	0	0	0	0	0	0	0	0	784	71	7169425	33129895	71	7
NOR_Tryc_subflye_sample09	tryc	subflye	sample09	NOR	flye	sub	tryc_subflye_sample09_contig2282	contig2282	NA	NA	NA	root (UID1)	5656	56	24	56	0	0	0	0	0	0	0	0	7260	71	7169425	33129895	71	7
NOR_Tryc_subflye_sample09	tryc	subflye	sample09	NOR	flye	sub	tryc_subflye_sample09_contig2293	contig2293	NA	NA	NA	root (UID1)	5656	56	24	56	0	0	0	0	0	0	0	0	25557	71	7169425	33129895	71	7
NOR_Tryc_subflye_sample09	tryc	subflye	sample09	NOR	flye	sub	tryc_subflye_sample09_contig2304	contig2304	NA	NA	NA	root (UID1)	5656	56	24	56	0	0	0	0	0	0	0	0	196741	71	7169425	33129895	71	7
NOR_Tryc_subflye_sample09	tryc	subflye	sample09	NOR	flye	sub	tryc_subflye_sample09_contig2326	contig2326	NA	NA	NA	root (UID1)	5656	56	24	56	0	0	0	0	0	0	0	0	17334	71	7169425	33129895	71	7
NOR_Tryc_subflye_sample09	tryc	subflye	sample09	NOR	flye	sub	tryc_subflye_sample09_contig2328	contig2328	NA	NA	NA	root (UID1)	5656	56	24	56	0	0	0	0	0	0	0	0	17551	71	7169425	33129895	71	7
NOR_Tryc_subflye_sample09	tryc	subflye	sample09	NOR	flye	sub	tryc_subflye_sample09_contig2335	contig2335	NA	NA	NA	root (UID1)	5656	56	24	56	0	0	0	0	0	0	0	0	15369	71	7169425	33129895	71	7
NOR_Tryc_subflye_sample09	tryc	subflye	sample09	NOR	flye	sub	tryc_subflye_sample09_contig2336	contig2336	NA	NA	NA	root (UID1)	5656	56	24	56	0	0	0	0	0	0	0	0	7821	71	7169425	33129895	71	7
NOR_Tryc_subflye_sample09	tryc	subflye	sample09	NOR	flye	sub	tryc_subflye_sample09_contig2339	contig2339	NA	NA	NA	root (UID1)	5656	56	24	56	0	0	0	0	0	0	0	0	3114	71	7169425	33129895	71	7
NOR_Tryc_subflye_sample09	tryc	subflye	sample09	NOR	flye	sub	tryc_subflye_sample09_contig2352	contig2352	NA	NA	NA	root (UID1)	5656	56	24	56	0	0	0	0	0	0	0	0	17575	71	7169425	33129895	71	7
NOR_Tryc_subflye_sample09	tryc	subflye	sample09	NOR	flye	sub	tryc_subflye_sample09_contig2359	contig2359	NA	NA	NA	root (UID1)	5656	56	24	56	0	0	0	0	0	0	0	0	2996	71	7169425	33129895	71	7
NOR_Tryc_subflye_sample09	tryc	subflye	sample09	NOR	flye	sub	tryc_subflye_sample09_contig2364	contig2364	NA	NA	NA	root (UID1)	5656	56	24	55	1	0	0	0	0	1.04	0	0	41559	71	7169425	33129895	71	7
NOR_Tryc_subflye_sample09	tryc	subflye	sample09	NOR	flye	sub	tryc_subflye_sample09_contig2371	contig2371	NA	NA	NA	root (UID1)	5656	56	24	56	0	0	0	0	0	0	0	0	1345	71	7169425	33129895	71	7
NOR_Tryc_subflye_sample09	tryc	subflye	sample09	NOR	flye	sub	tryc_subflye_sample09_contig2378	contig2378	NA	NA	NA	root (UID1)	5656	56	24	56	0	0	0	0	0	0	0	0	19326	71	7169425	33129895	71	7
NOR_Tryc_subflye_sample09	tryc	subflye	sample09	NOR	flye	sub	tryc_subflye_sample09_contig2380	contig2380	NA	NA	NA	root (UID1)	5656	56	24	56	0	0	0	0	0	0	0	0	7383	71	7169425	33129895	71	7
NOR_Tryc_subflye_sample09	tryc	subflye	sample09	NOR	flye	sub	tryc_subflye_sample09_contig2382	contig2382	NA	NA	NA	root (UID1)	5656	56	24	56	0	0	0	0	0	0	0	0	32167	71	7169425	33129895	71	7
NOR_Tryc_subflye_sample09	tryc	subflye	sample09	NOR	flye	sub	tryc_subflye_sample09_contig2384	contig2384	NA	NA	NA	root (UID1)	5656	56	24	56	0	0	0	0	0	0	0	0	39533	71	7169425	33129895	71	7
NOR_Tryc_subflye_sample09	tryc	subflye	sample09	NOR	flye	sub	tryc_subflye_sample09_contig2392	contig2392	NA	NA	NA	root (UID1)	5656	56	24	56	0	0	0	0	0	0	0	0	8377	71	7169425	33129895	71	7
NOR_Tryc_subflye_sample09	tryc	subflye	sample09	NOR	flye	sub	tryc_subflye_sample09_contig2401	contig2401	NA	NA	NA	root (UID1)	5656	56	24	56	0	0	0	0	0	0	0	0	26440	71	7169425	33129895	71	7
NOR_Tryc_subflye_sample09	tryc	subflye	sample09	NOR	flye	sub	tryc_subflye_sample09_contig2411	contig2411	NA	NA	NA	root (UID1)	5656	56	24	56	0	0	0	0	0	0	0	0	36278	71	7169425	33129895	71	7
NOR_Tryc_subflye_sample09	tryc	subflye	sample09	NOR	flye	sub	tryc_subflye_sample09_contig2412	contig2412	NA	NA	NA	root (UID1)	5656	56	24	56	0	0	0	0	0	0	0	0	5358	71	7169425	33129895	71	7
NOR_Tryc_subflye_sample09	tryc	subflye	sample09	NOR	flye	sub	tryc_subflye_sample09_contig2415	contig2415	NA	NA	NA	root (UID1)	5656	56	24	56	0	0	0	0	0	0	0	0	10644	71	7169425	33129895	71	7
NOR_Tryc_subflye_sample09	tryc	subflye	sample09	NOR	flye	sub	tryc_subflye_sample09_contig2416	contig2416	NA	NA	NA	root (UID1)	5656	56	24	56	0	0	0	0	0	0	0	0	4554	71	7169425	33129895	71	7
NOR_Tryc_subflye_sample09	tryc	subflye	sample09	NOR	flye	sub	tryc_subflye_sample09_contig2428	contig2428	NA	NA	NA	root (UID1)	5656	56	24	56	0	0	0	0	0	0	0	0	78110	71	7169425	33129895	71	7
NOR_Tryc_subflye_sample09	tryc	subflye	sample09	NOR	flye	sub	tryc_subflye_sample09_contig293	contig293	d__Bacteria;p__Bacteroidota	d__Bacteria	p__Bacteroidota	o__Cytophagales (UID2936)	47	454	336	79	370	5	0	0	0	80.48	0.95	0	4115277	71	7169425	33129895	71	7
NOR_Tryc_subflye_sample09	tryc	subflye	sample09	NOR	flye	sub	tryc_subflye_sample09_contig35	contig35	d__Bacteria;p__Nitrospirota	d__Bacteria	p__Nitrospirota	k__Bacteria (UID3187)	2258	181	110	35	143	3	0	0	0	76.78	2	0	4106165	71	7169425	33129895	71	7
NOR_Tryc_subflye_sample09	tryc	subflye	sample09	NOR	flye	sub	tryc_subflye_sample09_contig358	contig358	NA	NA	NA	root (UID1)	5656	56	24	56	0	0	0	0	0	0	0	0	97407	71	7169425	33129895	71	7
NOR_Tryc_subflye_sample09	tryc	subflye	sample09	NOR	flye	sub	tryc_subflye_sample09_contig401	contig401	NA	NA	NA	root (UID1)	5656	56	24	56	0	0	0	0	0	0	0	0	184166	71	7169425	33129895	71	7
NOR_Tryc_subflye_sample09	tryc	subflye	sample09	NOR	flye	sub	NA	contig446	NA	NA	NA	NA	NA	NA	NA	NA	NA	NA	NA	NA	NA	NA	NA	NA	1029	71	7169425	33129895	71	7
NOR_Tryc_subflye_sample09	tryc	subflye	sample09	NOR	flye	sub	tryc_subflye_sample09_contig546	contig546	NA	NA	NA	root (UID1)	5656	56	24	56	0	0	0	0	0	0	0	0	13045	71	7169425	33129895	71	7
NOR_Tryc_subflye_sample09	tryc	subflye	sample09	NOR	flye	sub	tryc_subflye_sample09_contig55	contig55	d__Bacteria;p__Proteobacteria	d__Bacteria	p__Proteobacteria	c__Gammaproteobacteria (UID4201)	1164	275	174	50	225	0	0	0	0	78.58	0	0	2641849	71	7169425	33129895	71	7
NOR_Tryc_subflye_sample09	tryc	subflye	sample09	NOR	flye	sub	tryc_subflye_sample09_contig598	contig598	NA	NA	NA	root (UID1)	5656	56	24	56	0	0	0	0	0	0	0	0	5179	71	7169425	33129895	71	7
NOR_Tryc_subflye_sample09	tryc	subflye	sample09	NOR	flye	sub	tryc_subflye_sample09_contig638	contig638	NA	NA	NA	root (UID1)	5656	56	24	56	0	0	0	0	0	0	0	0	6541	71	7169425	33129895	71	7
NOR_Tryc_subflye_sample09	tryc	subflye	sample09	NOR	flye	sub	tryc_subflye_sample09_contig642	contig642	NA	NA	NA	root (UID1)	5656	56	24	56	0	0	0	0	0	0	0	0	44232	71	7169425	33129895	71	7
NOR_Tryc_subflye_sample09	tryc	subflye	sample09	NOR	flye	sub	tryc_subflye_sample09_contig643	contig643	NA	NA	NA	root (UID1)	5656	56	24	56	0	0	0	0	0	0	0	0	20959	71	7169425	33129895	71	7
NOR_Tryc_subflye_sample09	tryc	subflye	sample09	NOR	flye	sub	tryc_subflye_sample09_contig645	contig645	NA	NA	NA	root (UID1)	5656	56	24	56	0	0	0	0	0	0	0	0	3941	71	7169425	33129895	71	7
NOR_Tryc_subflye_sample09	tryc	subflye	sample09	NOR	flye	sub	tryc_subflye_sample09_contig664	contig664	NA	NA	NA	root (UID1)	5656	56	24	56	0	0	0	0	0	0	0	0	19275	71	7169425	33129895	71	7
NOR_Tryc_subflye_sample09	tryc	subflye	sample09	NOR	flye	sub	tryc_subflye_sample09_contig671	contig671	NA	NA	NA	root (UID1)	5656	56	24	56	0	0	0	0	0	0	0	0	88073	71	7169425	33129895	71	7
NOR_Tryc_subflye_sample09	tryc	subflye	sample09	NOR	flye	sub	tryc_subflye_sample09_contig721	contig721	NA	NA	NA	root (UID1)	5656	56	24	56	0	0	0	0	0	0	0	0	16898	71	7169425	33129895	71	7
NOR_Tryc_subflye_sample09	tryc	subflye	sample09	NOR	flye	sub	tryc_subflye_sample09_contig750	contig750	NA	NA	NA	root (UID1)	5656	56	24	56	0	0	0	0	0	0	0	0	10950	71	7169425	33129895	71	7
NOR_Tryc_subflye_sample09	tryc	subflye	sample09	NOR	flye	sub	tryc_subflye_sample09_contig757	contig757	NA	NA	NA	root (UID1)	5656	56	24	56	0	0	0	0	0	0	0	0	57989	71	7169425	33129895	71	7
NOR_Tryc_subflye_sample09	tryc	subflye	sample09	NOR	flye	sub	tryc_subflye_sample09_contig775	contig775	NA	NA	NA	root (UID1)	5656	56	24	56	0	0	0	0	0	0	0	0	9177	71	7169425	33129895	71	7
NOR_Tryc_subflye_sample09	tryc	subflye	sample09	NOR	flye	sub	tryc_subflye_sample09_contig847	contig847	NA	NA	NA	root (UID1)	5656	56	24	56	0	0	0	0	0	0	0	0	31264	71	7169425	33129895	71	7
NOR_Tryc_subflye_sample09	tryc	subflye	sample09	NOR	flye	sub	tryc_subflye_sample09_contig967	contig967	NA	NA	NA	root (UID1)	5656	56	24	56	0	0	0	0	0	0	0	0	4305	71	7169425	33129895	71	7
NOR_Tryc_subflye_sample09	tryc	subflye	sample09	NOR	flye	sub	tryc_subflye_sample09_contig978	contig978	NA	NA	NA	root (UID1)	5656	56	24	56	0	0	0	0	0	0	0	0	6586	71	7169425	33129895	71	7
NOR_Tryc_subflye_sample09	tryc	subflye	sample09	NOR	flye	sub	tryc_subflye_sample09_contig982	contig982	NA	NA	NA	root (UID1)	5656	56	24	56	0	0	0	0	0	0	0	0	3891	71	7169425	33129895	71	7
NOR_Tryc_subflye_sample10	tryc	subflye	sample10	NOR	flye	sub	tryc_subflye_sample10_contig102	contig102	d__Bacteria;p__Bacteroidota	d__Bacteria	p__Bacteroidota	o__Cytophagales (UID2936)	47	454	336	94	357	3	0	0	0	75.63	0.69	0	4520867	74	7169027	33560834	74	7
NOR_Tryc_subflye_sample10	tryc	subflye	sample10	NOR	flye	sub	tryc_subflye_sample10_contig1056	contig1056	NA	NA	NA	root (UID1)	5656	56	24	56	0	0	0	0	0	0	0	0	88050	74	7169027	33560834	74	7
NOR_Tryc_subflye_sample10	tryc	subflye	sample10	NOR	flye	sub	tryc_subflye_sample10_contig112	contig112	d__Bacteria;p__Proteobacteria	d__Bacteria	p__Proteobacteria	c__Gammaproteobacteria (UID4202)	67	481	276	74	399	8	0	0	0	82.48	2.28	0	2730556	74	7169027	33560834	74	7
NOR_Tryc_subflye_sample10	tryc	subflye	sample10	NOR	flye	sub	tryc_subflye_sample10_contig1208	contig1208	NA	NA	NA	root (UID1)	5656	56	24	56	0	0	0	0	0	0	0	0	20934	74	7169027	33560834	74	7
NOR_Tryc_subflye_sample10	tryc	subflye	sample10	NOR	flye	sub	tryc_subflye_sample10_contig1232	contig1232	NA	NA	NA	root (UID1)	5656	56	24	56	0	0	0	0	0	0	0	0	54582	74	7169027	33560834	74	7
NOR_Tryc_subflye_sample10	tryc	subflye	sample10	NOR	flye	sub	tryc_subflye_sample10_contig1236	contig1236	NA	NA	NA	root (UID1)	5656	56	24	56	0	0	0	0	0	0	0	0	7829	74	7169027	33560834	74	7
NOR_Tryc_subflye_sample10	tryc	subflye	sample10	NOR	flye	sub	tryc_subflye_sample10_contig1281	contig1281	NA	NA	NA	root (UID1)	5656	56	24	56	0	0	0	0	0	0	0	0	7657	74	7169027	33560834	74	7
NOR_Tryc_subflye_sample10	tryc	subflye	sample10	NOR	flye	sub	tryc_subflye_sample10_contig129	contig129	NA	NA	NA	root (UID1)	5656	56	24	56	0	0	0	0	0	0	0	0	260170	74	7169027	33560834	74	7
NOR_Tryc_subflye_sample10	tryc	subflye	sample10	NOR	flye	sub	tryc_subflye_sample10_contig130	contig130	NA	NA	NA	root (UID1)	5656	56	24	56	0	0	0	0	0	0	0	0	184009	74	7169027	33560834	74	7
NOR_Tryc_subflye_sample10	tryc	subflye	sample10	NOR	flye	sub	tryc_subflye_sample10_contig131	contig131	NA	NA	NA	root (UID1)	5656	56	24	56	0	0	0	0	0	0	0	0	40701	74	7169027	33560834	74	7
NOR_Tryc_subflye_sample10	tryc	subflye	sample10	NOR	flye	sub	tryc_subflye_sample10_contig1369	contig1369	NA	NA	NA	root (UID1)	5656	56	24	56	0	0	0	0	0	0	0	0	9194	74	7169027	33560834	74	7
NOR_Tryc_subflye_sample10	tryc	subflye	sample10	NOR	flye	sub	tryc_subflye_sample10_contig1417	contig1417	NA	NA	NA	root (UID1)	5656	56	24	56	0	0	0	0	0	0	0	0	3061	74	7169027	33560834	74	7
NOR_Tryc_subflye_sample10	tryc	subflye	sample10	NOR	flye	sub	tryc_subflye_sample10_contig1444	contig1444	NA	NA	NA	root (UID1)	5656	56	24	56	0	0	0	0	0	0	0	0	6946	74	7169027	33560834	74	7
NOR_Tryc_subflye_sample10	tryc	subflye	sample10	NOR	flye	sub	tryc_subflye_sample10_contig149	contig149	NA	NA	NA	root (UID1)	5656	56	24	56	0	0	0	0	0	0	0	0	5310	74	7169027	33560834	74	7
NOR_Tryc_subflye_sample10	tryc	subflye	sample10	NOR	flye	sub	tryc_subflye_sample10_contig1493	contig1493	NA	NA	NA	root (UID1)	5656	56	24	56	0	0	0	0	0	0	0	0	196828	74	7169027	33560834	74	7
NOR_Tryc_subflye_sample10	tryc	subflye	sample10	NOR	flye	sub	tryc_subflye_sample10_contig1500	contig1500	NA	NA	NA	root (UID1)	5656	56	24	56	0	0	0	0	0	0	0	0	1676	74	7169027	33560834	74	7
NOR_Tryc_subflye_sample10	tryc	subflye	sample10	NOR	flye	sub	tryc_subflye_sample10_contig1507	contig1507	NA	NA	NA	root (UID1)	5656	56	24	56	0	0	0	0	0	0	0	0	31248	74	7169027	33560834	74	7
NOR_Tryc_subflye_sample10	tryc	subflye	sample10	NOR	flye	sub	tryc_subflye_sample10_contig1518	contig1518	NA	NA	NA	root (UID1)	5656	56	24	56	0	0	0	0	0	0	0	0	8590	74	7169027	33560834	74	7
NOR_Tryc_subflye_sample10	tryc	subflye	sample10	NOR	flye	sub	tryc_subflye_sample10_contig155	contig155	d__Bacteria;p__Proteobacteria	d__Bacteria	p__Proteobacteria	f__Rhodobacteraceae (UID3340)	84	568	330	345	223	0	0	0	0	38.23	0	0	3787290	74	7169027	33560834	74	7
NOR_Tryc_subflye_sample10	tryc	subflye	sample10	NOR	flye	sub	tryc_subflye_sample10_contig1739	contig1739	NA	NA	NA	root (UID1)	5656	56	24	56	0	0	0	0	0	0	0	0	5930	74	7169027	33560834	74	7
NOR_Tryc_subflye_sample10	tryc	subflye	sample10	NOR	flye	sub	tryc_subflye_sample10_contig1747	contig1747	NA	NA	NA	root (UID1)	5656	56	24	56	0	0	0	0	0	0	0	0	3100	74	7169027	33560834	74	7
NOR_Tryc_subflye_sample10	tryc	subflye	sample10	NOR	flye	sub	tryc_subflye_sample10_contig1755	contig1755	NA	NA	NA	root (UID1)	5656	56	24	56	0	0	0	0	0	0	0	0	4638	74	7169027	33560834	74	7
NOR_Tryc_subflye_sample10	tryc	subflye	sample10	NOR	flye	sub	tryc_subflye_sample10_contig1795	contig1795	NA	NA	NA	root (UID1)	5656	56	24	56	0	0	0	0	0	0	0	0	16919	74	7169027	33560834	74	7
NOR_Tryc_subflye_sample10	tryc	subflye	sample10	NOR	flye	sub	tryc_subflye_sample10_contig1871	contig1871	NA	NA	NA	root (UID1)	5656	56	24	56	0	0	0	0	0	0	0	0	3636	74	7169027	33560834	74	7
NOR_Tryc_subflye_sample10	tryc	subflye	sample10	NOR	flye	sub	tryc_subflye_sample10_contig1882	contig1882	NA	NA	NA	root (UID1)	5656	56	24	56	0	0	0	0	0	0	0	0	12976	74	7169027	33560834	74	7
NOR_Tryc_subflye_sample10	tryc	subflye	sample10	NOR	flye	sub	tryc_subflye_sample10_contig1920	contig1920	NA	NA	NA	root (UID1)	5656	56	24	56	0	0	0	0	0	0	0	0	1994	74	7169027	33560834	74	7
NOR_Tryc_subflye_sample10	tryc	subflye	sample10	NOR	flye	sub	tryc_subflye_sample10_contig1930	contig1930	NA	NA	NA	root (UID1)	5656	56	24	56	0	0	0	0	0	0	0	0	6707	74	7169027	33560834	74	7
NOR_Tryc_subflye_sample10	tryc	subflye	sample10	NOR	flye	sub	tryc_subflye_sample10_contig1940	contig1940	NA	NA	NA	root (UID1)	5656	56	24	56	0	0	0	0	0	0	0	0	2904	74	7169027	33560834	74	7
NOR_Tryc_subflye_sample10	tryc	subflye	sample10	NOR	flye	sub	tryc_subflye_sample10_contig1941	contig1941	NA	NA	NA	root (UID1)	5656	56	24	56	0	0	0	0	0	0	0	0	17603	74	7169027	33560834	74	7
NOR_Tryc_subflye_sample10	tryc	subflye	sample10	NOR	flye	sub	tryc_subflye_sample10_contig1987	contig1987	NA	NA	NA	root (UID1)	5656	56	24	56	0	0	0	0	0	0	0	0	4101	74	7169027	33560834	74	7
NOR_Tryc_subflye_sample10	tryc	subflye	sample10	NOR	flye	sub	tryc_subflye_sample10_contig1989	contig1989	NA	NA	NA	root (UID1)	5656	56	24	56	0	0	0	0	0	0	0	0	2572	74	7169027	33560834	74	7
NOR_Tryc_subflye_sample10	tryc	subflye	sample10	NOR	flye	sub	tryc_subflye_sample10_contig2164	contig2164	NA	NA	NA	root (UID1)	5656	56	24	56	0	0	0	0	0	0	0	0	19293	74	7169027	33560834	74	7
NOR_Tryc_subflye_sample10	tryc	subflye	sample10	NOR	flye	sub	tryc_subflye_sample10_contig2318	contig2318	NA	NA	NA	root (UID1)	5656	56	24	56	0	0	0	0	0	0	0	0	15612	74	7169027	33560834	74	7
NOR_Tryc_subflye_sample10	tryc	subflye	sample10	NOR	flye	sub	tryc_subflye_sample10_contig2322	contig2322	NA	NA	NA	root (UID1)	5656	56	24	56	0	0	0	0	0	0	0	0	25471	74	7169027	33560834	74	7
NOR_Tryc_subflye_sample10	tryc	subflye	sample10	NOR	flye	sub	tryc_subflye_sample10_contig2355	contig2355	NA	NA	NA	root (UID1)	5656	56	24	56	0	0	0	0	0	0	0	0	8171	74	7169027	33560834	74	7
NOR_Tryc_subflye_sample10	tryc	subflye	sample10	NOR	flye	sub	tryc_subflye_sample10_contig2358	contig2358	NA	NA	NA	root (UID1)	5656	56	24	56	0	0	0	0	0	0	0	0	9898	74	7169027	33560834	74	7
NOR_Tryc_subflye_sample10	tryc	subflye	sample10	NOR	flye	sub	tryc_subflye_sample10_contig2362	contig2362	NA	NA	NA	root (UID1)	5656	56	24	56	0	0	0	0	0	0	0	0	115217	74	7169027	33560834	74	7
NOR_Tryc_subflye_sample10	tryc	subflye	sample10	NOR	flye	sub	tryc_subflye_sample10_contig2385	contig2385	NA	NA	NA	root (UID1)	5656	56	24	56	0	0	0	0	0	0	0	0	57990	74	7169027	33560834	74	7
NOR_Tryc_subflye_sample10	tryc	subflye	sample10	NOR	flye	sub	tryc_subflye_sample10_contig2392	contig2392	NA	NA	NA	root (UID1)	5656	56	24	56	0	0	0	0	0	0	0	0	17326	74	7169027	33560834	74	7
NOR_Tryc_subflye_sample10	tryc	subflye	sample10	NOR	flye	sub	tryc_subflye_sample10_contig2402	contig2402	NA	NA	NA	root (UID1)	5656	56	24	56	0	0	0	0	0	0	0	0	3165	74	7169027	33560834	74	7
NOR_Tryc_subflye_sample10	tryc	subflye	sample10	NOR	flye	sub	tryc_subflye_sample10_contig2406	contig2406	NA	NA	NA	root (UID1)	5656	56	24	56	0	0	0	0	0	0	0	0	1960	74	7169027	33560834	74	7
NOR_Tryc_subflye_sample10	tryc	subflye	sample10	NOR	flye	sub	tryc_subflye_sample10_contig241	contig241	d__Bacteria;p__Nitrospirota	d__Bacteria	p__Nitrospirota	k__Bacteria (UID3187)	2258	181	110	49	130	2	0	0	0	65.04	1.82	0	4106163	74	7169027	33560834	74	7
NOR_Tryc_subflye_sample10	tryc	subflye	sample10	NOR	flye	sub	tryc_subflye_sample10_contig2415	contig2415	NA	NA	NA	root (UID1)	5656	56	24	56	0	0	0	0	0	0	0	0	78129	74	7169027	33560834	74	7
NOR_Tryc_subflye_sample10	tryc	subflye	sample10	NOR	flye	sub	tryc_subflye_sample10_contig2421	contig2421	NA	NA	NA	root (UID1)	5656	56	24	56	0	0	0	0	0	0	0	0	20959	74	7169027	33560834	74	7
NOR_Tryc_subflye_sample10	tryc	subflye	sample10	NOR	flye	sub	tryc_subflye_sample10_contig2422	contig2422	NA	NA	NA	root (UID1)	5656	56	24	56	0	0	0	0	0	0	0	0	24666	74	7169027	33560834	74	7
NOR_Tryc_subflye_sample10	tryc	subflye	sample10	NOR	flye	sub	tryc_subflye_sample10_contig2425	contig2425	NA	NA	NA	root (UID1)	5656	56	24	56	0	0	0	0	0	0	0	0	17456	74	7169027	33560834	74	7
NOR_Tryc_subflye_sample10	tryc	subflye	sample10	NOR	flye	sub	tryc_subflye_sample10_contig2430	contig2430	NA	NA	NA	root (UID1)	5656	56	24	56	0	0	0	0	0	0	0	0	9957	74	7169027	33560834	74	7
NOR_Tryc_subflye_sample10	tryc	subflye	sample10	NOR	flye	sub	tryc_subflye_sample10_contig2435	contig2435	NA	NA	NA	root (UID1)	5656	56	24	56	0	0	0	0	0	0	0	0	5409	74	7169027	33560834	74	7
NOR_Tryc_subflye_sample10	tryc	subflye	sample10	NOR	flye	sub	tryc_subflye_sample10_contig2438	contig2438	NA	NA	NA	root (UID1)	5656	56	24	56	0	0	0	0	0	0	0	0	32160	74	7169027	33560834	74	7
NOR_Tryc_subflye_sample10	tryc	subflye	sample10	NOR	flye	sub	tryc_subflye_sample10_contig2446	contig2446	NA	NA	NA	root (UID1)	5656	56	24	56	0	0	0	0	0	0	0	0	4535	74	7169027	33560834	74	7
NOR_Tryc_subflye_sample10	tryc	subflye	sample10	NOR	flye	sub	tryc_subflye_sample10_contig2449	contig2449	NA	NA	NA	root (UID1)	5656	56	24	56	0	0	0	0	0	0	0	0	4305	74	7169027	33560834	74	7
NOR_Tryc_subflye_sample10	tryc	subflye	sample10	NOR	flye	sub	tryc_subflye_sample10_contig2452	contig2452	NA	NA	NA	root (UID1)	5656	56	24	56	0	0	0	0	0	0	0	0	41434	74	7169027	33560834	74	7
NOR_Tryc_subflye_sample10	tryc	subflye	sample10	NOR	flye	sub	tryc_subflye_sample10_contig260	contig260	d__Bacteria;p__Bacteroidota	d__Bacteria	p__Bacteroidota	o__Cytophagales (UID2936)	47	454	336	77	371	5	1	0	0	81.69	1.55	0	4115304	74	7169027	33560834	74	7
NOR_Tryc_subflye_sample10	tryc	subflye	sample10	NOR	flye	sub	tryc_subflye_sample10_contig282	contig282	NA	NA	NA	root (UID1)	5656	56	24	56	0	0	0	0	0	0	0	0	7538	74	7169027	33560834	74	7
NOR_Tryc_subflye_sample10	tryc	subflye	sample10	NOR	flye	sub	tryc_subflye_sample10_contig29	contig29	NA	NA	NA	root (UID1)	5656	56	24	56	0	0	0	0	0	0	0	0	11697	74	7169027	33560834	74	7
NOR_Tryc_subflye_sample10	tryc	subflye	sample10	NOR	flye	sub	tryc_subflye_sample10_contig34	contig34	d__Bacteria;p__Acidobacteriota	d__Bacteria	p__Acidobacteriota	k__Bacteria (UID3187)	2258	188	117	45	139	4	0	0	0	74.05	1.76	0	7169027	74	7169027	33560834	74	7
NOR_Tryc_subflye_sample10	tryc	subflye	sample10	NOR	flye	sub	tryc_subflye_sample10_contig394	contig394	NA	NA	NA	root (UID1)	5656	56	24	56	0	0	0	0	0	0	0	0	27334	74	7169027	33560834	74	7
NOR_Tryc_subflye_sample10	tryc	subflye	sample10	NOR	flye	sub	tryc_subflye_sample10_contig414	contig414	NA	NA	NA	root (UID1)	5656	56	24	56	0	0	0	0	0	0	0	0	32181	74	7169027	33560834	74	7
NOR_Tryc_subflye_sample10	tryc	subflye	sample10	NOR	flye	sub	tryc_subflye_sample10_contig592	contig592	NA	NA	NA	root (UID1)	5656	56	24	56	0	0	0	0	0	0	0	0	7373	74	7169027	33560834	74	7
NOR_Tryc_subflye_sample10	tryc	subflye	sample10	NOR	flye	sub	tryc_subflye_sample10_contig61	contig61	d__Bacteria;p__Actinobacteriota	d__Bacteria	p__Actinobacteriota	g__Mycobacterium (UID1816)	100	693	300	109	582	2	0	0	0	83.48	0.67	0	5218294	74	7169027	33560834	74	7
NOR_Tryc_subflye_sample10	tryc	subflye	sample10	NOR	flye	sub	tryc_subflye_sample10_contig622	contig622	NA	NA	NA	root (UID1)	5656	56	24	56	0	0	0	0	0	0	0	0	8935	74	7169027	33560834	74	7
NOR_Tryc_subflye_sample10	tryc	subflye	sample10	NOR	flye	sub	tryc_subflye_sample10_contig634	contig634	NA	NA	NA	root (UID1)	5656	56	24	56	0	0	0	0	0	0	0	0	6580	74	7169027	33560834	74	7
NOR_Tryc_subflye_sample10	tryc	subflye	sample10	NOR	flye	sub	tryc_subflye_sample10_contig640	contig640	NA	NA	NA	root (UID1)	5656	56	24	56	0	0	0	0	0	0	0	0	4217	74	7169027	33560834	74	7
[truncated: 234 more rows]

## Sheet: Long (>1mbp) contigs
Assembly	asmblr	setting	sample	rctr	asmblr2	setting2	full_cont	contig	gtdb_lineage_tophy	gtdb_dom	gtdb_phy	checkm_lin	checkm_dbgenomes	checkm_dbmarkers	checkm_dbmrkrsets	checkm_0copy	checkm_1copy	checkm_2copy	checkm_3copy	checkm_4copy	checkm_5copy	checkm_comp	checkm_cont	checkm_strnhet
[truncated: 801 more rows]

[truncated: 9 more sheets: rpoB genes, Automated bins, Assembly-level CheckM, Prodigal, Assembly-level BUSCO, IDEEL, BBMap, ALE, Pilon]
