# Supplementary material for: Simple, reference-independent assessment to empirically guide correction and polishing of hybrid microbial community metagenomic assembly
Source: PeerJ. 2024 Nov 8;12:e18132. doi: 10.7717/peerj.18132 (PMC11552494; doi:10.7717/peerj.18132)
Supplement: Supplemental Information 2 — Extended results including baseline assembly of reads using short-read only, short-read first hybrid, and long-read only approaches, as well as automated binning, and alpha and beta diversity, gene fragmentation, and short read recruitment during long read correction and short read polishing of both bioreactors. [file peerj-12-18132-s002.docx]

**Title:**

Simple, reference-independent assessment to empirically guide correction and polishing of hybrid microbial community metagenomic assembly

**Authors:**

Garrett J. Smith1,2,#, Theo A. van Alen1, Maartje A.H.J. van Kessel1, Sebastian Lücker1,#

**Affiliations:**

1 Department of Microbiology, Radboud Institute for Biological and Environmental Sciences, Radboud University, Nijmegen, The Netherlands

2 Department of Microbiology, The Ohio State University, Ohio, USA

# Corresponding author

**Corresponding author and contact information:**

[Smith.10284@osu.edu](mailto:Smith.10284@osu.edu)

[s.luecker@science.ru.nl](mailto:s.luecker@science.ru.nl)

**Supplemental Methods**

*Approach justification*

Benchmarking has shown that every tool choice, version, and implementation – the sequencing platform, basecalling, assembly, correction and polishing, and more – will affect (meta)genome reconstruction quality due to differences in chemistry, algorithms, or other features1–68. There does not appear to be any single or combination of technologies that yields a perfect assembly, and a “best” option is subjective, for example, given willingness to sacrifice computational demands for weaker performance, or vice-versa. The assembly quality metric(s), or even the tools used to assess them, can arguably also impact the true quality of the reconstructed (meta)genome as well, particularly for genome recovery69–73. The approach here was informed by benchmarking or comparative studies, largely of various microbial isolates and synthetic or mock communities, as well as studies of various ecosystems including wastewater treatment sludge that could be considered relatively similar to our bioreactors inoculated with activated sludge15,16,24,25,27,74. No quantification of use in the literature was performed, but in general, we chose tools and parameters based on: (1) the prevalence of their use in the field of microbial (meta)genomics, (2) minimizing computational and monetary resource expenditure, which are likely limiting factors for many projects, (3) value inferred from published benchmarking or comparative studies, and (4) ease of use and documentation or incorporation into already existing pipelines/workflows. We did not include several other tools that did meet these criteria, were even tested, or even reportedly performed better to reduce experimental complexity and technical variation, or more simply because they were not available or functional on our computing system without substantial effort.

Biomass collection dates from the bioreactor systems examined here were chosen to update the metagenomic inventory available for the system in preparation for a community reconstruction (Nov. 2020) and then later for the intent of long-read sequencing (Mar. 2021).

Two DNA isolation protocols are standard in our laboratory due to strong evidence that they introduce sufficient bias to aid differential coverage binning75–77.

The ONT platform was used to generate LR sequencing for these bioreactors because it was an in-house facility capability. Following, only one version of chemistry was available in the facility at the time, and what appeared to be the state-of-the-art basecalling algorithm for microbial genomes was used for all of the facility’s outputs23,78. Similarly, Illumina MiSeq was used because it was an in-house SR sequencing capability. Both LR and SR sequencing was performed according the standard operating procedures, including reagents and protocols, of the sequencing facility, which were informed by manufacturer instructions. One bioreactor was sequenced more deeply because of an observed greater richness in a 16S rRNA gene amplicon sequencing survey (unpublished), use of this bioreactor for previous metagenomic projects79 and greater interest in improving upon extant community reconstructions.

BBduk was used to trim and filter SRs because of its one-step capabilities for Illumina read quality processing and its accompanying suite of tools for working with various sequencing data80. Porechop was used for LR trimming because of its ease of use and implementation in studies of related ecosystems16,74,81. The exact quality cutoffs were arbitrarily chosen to help balance data quantity and quality (not shown).

OPERA-MS appeared to be a prevalent SR-first hybrid assembler but is methodologically biased towards model organisms and host ecosystems27, whereas hybridSPAdes appeared approximately as prevalent an SR-first hybrid assembler but lacks any methodological bias towards certain taxa or ecosystems and is capable of SR-alone assembly20. Unicycler has the ability to perform SR-first hybrid as well as SR- and LR-alone assemblies, which therefore enables assembly of all possible read types and combinations with one program82. Additionally, its ability to automate the optimization of the assemblies for successful, high-quality, circular single genome recovery has made it popular. Furthermore, all tested SR-dependent assemblers tested implement SPAdes for SR-assembly, thus reducing the technical variation.

The Trycycler utility “subsample” was used to evenly subsample the LRs for assembly because of its shared developer with Unicycler8,82 and seeming ease of use. Published comparisons tend to suggest that these assemblers are capable of microbial genome recovery on par with comparable tools7,8,15,20,24,27,82, and have even pointed out their prevalence in the field15.

Canu and Flye were used for LR assembly because of the popularity in the field, and publications describing metagenome-optimization or a suite of parameters to enable this aspect14,15,21,28,74. As some of the first LR assemblers, these are compared often and tend to compete well for microbial genomes, or are included in comparisons of other tools6–11,14,15,21,24,32,40–43. Other assemblers were tested but were not described here because (1) they did not appear to perform as well, (2) were not as prevalent in the field, and therefore (3) would only have added unnecessary additional complexity with potentially little impact on the results. Several settings were tested as well. The metagenome-optimized settings were favored because the goal was to assemble metagenomic data, but default settings were included as few direct comparisons were made and we wanted to ensure advantage over the default for our dataset. Subsampled reads were also tested because Trycycler documentation suggests that slightly different read pools may be assembled slightly differently. There was initially an intent to expand correction and polishing to consensus MAGs from Trycycler, but this was deemed overly complex and consumed unnecessary computational resources. This information was kept in this manuscript because it both validated and contrasted the expectations of benchmarks: slightly different assemblies were generated in terms of size and composition but there wasn’t a major apparent sacrifice in quality, in a somewhat assembler-dependent manner.

Racon and Pilon were chosen for LR correction and SR polishing, respectively. In many benchmarking studies, these tools may be outcompeted by others, or may need additional tools to resolve leftover errors1,8,12,73. However, these tools are commonly used in the field, are compared frequently and appear to perform nearly on par with other tools, have low computational demands, and even are incorporated into published pipelines or workflows1,8,14,16,21,22,37,39,43,68,74,82–85. One tool using Racon in its automated workflow, Unicyclyer82, was already used here thus limiting unnecessary technical variation. Additionally, these tools have relatively simple computational requirements that allow almost any user to use them. Furthermore, these specific tools have additional advantages: Racon can be used for LR correction or SR polishing, though this complicates a general inference of its success9,16,74, and Pilon includes several other features like data-rich logging and variant calling13.

The maximum number of iterations of LR correction and SR polishing (10) was chosen because it was the maximum observed in the literature1,86. The breaks in LR correction at which SR polishing was performed (0, 2, 5, and 10) were chosen to represent the SR polishing alone (0), and a seemingly common number of iterations (26,9,11,16,21,28,32,68,74,84,87–89), and excessive (58,87, 101,86,87,90) number of iterations by which we expected to observe clearly diminishing returns on the efforts given information from benchmarks. Highly diverse correction and polishing strategies complicate the ability to inform these arbitrary decisions. We further considered that many benchmarks were performed on single microbial genomes, particularly those that compared assembly quality over multiple iterations of tool application, and the complexity of a metagenome may warrant additional iterations. We did not examine SR polishing after a single iteration of LR correction because it was rarely observed in literature and essentially never when these tools were used.

metaQUAST was used for cursory comparison of assembly statistics because it is commonly employed and provides valuable summaries for comparing contig and bp distributions of multiple assemblies4,7,10,14,16,19,20,26,37,39,69,82,85,89.

The read recruitment software was chosen for separate reasons. Minimap was chosen for LR recruitment because the output format is recognized by Racon and is implemented in other tools used here, but we acknowledge it’s performance may not be competitive with others in some cases though its low resource demand may offset its disadvantages9,54,61,62,91,92. BBmap was used for SR recruitment because it offers many thresholds to apply towards alignment parameters and data-rich logging and summaries that support an analyses of the read alignments themselves, and performs on par with comparable tools though it can be computationally demanding in some cases54,80. To recruit reads for input to Pilon, a 97.5% identity threshold was applied with to help balance maximizing SR alignment to inaccurate sequences and minimize multiple SR alignments, though no additional thresholds were tested or analyses done to validate this decision. For assessing read recruitment and ambiguity, BBmap was implemented to only report perfect mappings to reduce noise of multiple SR alignments caused by strain diversity and multi-copy genes80. The mmlong utility *readcoverage2* was used for abundance profiling because it calculated read depths similarly for both LR and SR datasets (*i.e.*, by bps rather than read counts) and offered a simple output that can be input into the automated binner chosen92.

The *rpoB* gene was chosen as the single-copy phylogenetic marker because the HMM profile (PF04563) curated by the Protein Family (pfam) database includes all three domains of life and the computational capabilities were in place from a published project for this system79,93. We acknowledge that other phylogenetic markers may be better and/or more common.

For beta diversity clustering, we chose NMDS calculated with Bray-Curtis dissimilarity as this is a staple analysis of both macro- and microbial ecology94–96. Other statistics, for example, PCA or PCoA, are also popular, but this approach was developed specifically for compositional analyses of communities and performs equally well94,95,97. The “species” scores were analyzed instead of the typical “site” scores because the data were structured such that correction and polishing iterations were encoded by the marker genes themselves rather than the read profiles.

Metabat2 was chosen as the automated binner because it tends to perform well in benchmarks, is common to the field and often compared, and is incorporated into published pipelines4,16,17,19,24,25,28,50,52,70,74,83–85,89,98,99. Only one binning program was chosen to reduce technical variation and complexity, and theoretically, with the advantages in contiguity that LR assembly offers for automated binning, we assumed that the automated binner(s) should not make a large difference.

GTDB-tk was chosen for taxonomic inference of the microbial genomes for essentially the same reasons as CheckM, and also has few competitors4,8,16,24,25,28,72–74,83–85,89,98–100.

As far as we know, there are no tools specifically developed to inventory phylogenetic/single copy marker genes to assess the quality, redundancy, or fragmentation of a metagenomic assembly. CheckM was chosen for microbial marker gene recovery summarization and automated bin quality estimation because it is commonly applied for these purposes in microbial genome recovery from metagenomes, is used in benchmarking studies, and has a straightforward implementation in downstream tools14,16,17,19,24,25,27,28,70,71,74,83,84,89,100. BUSCO was chosen as a marker gene recovery summary tool partially because, in contrast to CheckM, it is capable of assessing marker gene of Eukaryotes and therefore can be applied to various uncharacterized communities, and is similar to CheckM in its application in the field and benchmarks1,10,19,28,39,98,101. An additional advantage of CheckM is a theoretically infinite score for whole-genome redundancy, while an additional advantage of BUSCO is that it assesses the fragmentation of marker genes in addition to their presence.

Prodigal was chosen for ORF finding because it includes metagenome-optimized settings, information-rich headers that supported some of these analyses, and is implemented in the marker gene recovery pipelines chosen therefore reducing unnecessary technical variation71,72,100–102.

IDEEL was chosen to compare gene lengths to reference sequences because it has been used in similar studies and has little apparent competition8,16,84,89.

ALE was chosen as it was specifically developed to use short read recruitment profiles as an indicator for assembly quality103, and its implementation in evaluating hybrid assembly of microbial genomes8,73.

The tools used here, their purpose in this study, and the rationale for their use are summarized in Table S1.

**Supplemental Results**

*Additional information on sequencing yield*

*Additional information on the long-read, short-read, and short-read-first hybrid assembly baselines*

SR-alone and SR-first assemblies with SPAdes led to the most fractured assemblies with only 25-37% of the 95-325 total assembled Mbps on larger contigs (>50 Kbp) and did not produce any circularized contigs (Dataset S1, Fig. S1). OPERA-MS, which depends on SPAdes in its SR-first hybrid assembly strategy, only improved upon the SPAdes SR-first hybrid assembly by having a larger fraction of bps on larger contigs, almost 50% of the 144-228 total assembled Mbp (Dataset S1). All assemblies produced with Unicycler were smaller but more contiguous than the other SR hybrid assembly programs, with 50-90% of the total 57-102 Mbps in larger contigs (>50Kbp) and 19-49 circular contigs (Dataset S1). Given that Unicycler was developed for single genome assemblies, these assemblies were expected to be smaller but more contiguous, and likely of higher quality, when, arguably incorrectly, applied to a metagenome. Overall, these programs performed as expected for SR-alone or SR-first hybrid assemblers that can create large assemblies, which tend to be fractured among small contigs and challenging to circularize.

Both LR assemblers Canu and Flye resulted in larger and more contiguous assemblies than the SR assemblers. LR assemblers averaged 170 and 235 total assembled Mbps for the OLR and NLR, respectively, with 50-90% among larger contigs (Dataset S1). As expected, assemblies generated with default settings developed for the assembly of individual and often eukaryotic genomes were of relatively poor quality compared to metagenome-optimized settings in either size or contiguity. Specifically, the size of the Canu assemblies increased nearly 2-fold by using metagenome-optimized settings, the fraction on larger contigs increased from 52% to 62-66%, and the total bps in circular contigs increased two to three orders of magnitude (Dataset S1). Flye’s improvements were smaller by increasing total size by 10-20 Mbps and total bps in circular contigs by less than one order of magnitude (Dataset S1). Assembling sub-sampled reads slightly decreased assembly sizes and typically maintained contiguity, but interestingly produced the longest contiguous sequence (9.19 Mbps in the OLR) and was able to circularize microbial genomes that were not circularized in the full dataset, including the largest circular contigs (7.17 Mbp in the NLR, see below and Dataset S1). Most studies on the effect of read depth demonstrate that increasing depth leads to improved assembly quality, therefore it was unexpected to find that lower read depths helped to recover distinct, presumably complete genomes. Unexpectedly, the correct-then-assemble program Canu yielded smaller and more fractured assemblies compared to the assemble-then-correct program Flye, with 15-37 total assembled Mbps less and only 62-66% versus 88-90% of bps on larger contigs (Dataset S1).

Not only did Canu lead to smaller and more fractured assemblies, these assemblies appeared to be of lower quality compared to Flye as well. Canu assembled fewer and smaller circular contigs that may represent complete plasmid, phage, or microbial sequences (Fig. S2). Using default settings, it assembled only 3 circular contigs, none of which were probable microbial genomes (>1 Mbp), while Flye constructed a total of 81 circular contigs, of which 6 and 2 in the OLR and NLR, respectively (Dataset S1), may represent complete microbial genomes. This gap hardly narrowed when using metagenome-optimized settings or with sub-sampled reads, resulting in Flye circularizing 13.2-fold more contigs across all assemblies than Canu. Furthermore, the estimated completion of circular contigs from Canu tended to be lower. For circular contigs >5 Kbp and with completion >0%, the mean completion from Canu assemblies was 40.7% across both reactors and 56.5% for Flye (Dataset S1). We do acknowledge that Unicycler produced the highest quality circular contigs, with 3 >95% complete and <5% contaminated contigs from SR-first hybrid assemblies (Dataset S1), but the overall yield of circularized, larger, and at least partially complete circular contigs was outmatched by both Canu and Flye when run with metagenome-optimized settings. Therefore, when LRs are available, using an LR assembler yields more and more contiguous data but requires error-fixing to match SR-first hybrid assemblies.

Similar trends were observed for non-circular, long contigs (>1 Mbp) that may also represent nearly or essentially complete microbial genomes (Dataset S1, Fig. S3). SR-dependent assemblers as well as Canu with default settings tended to produce less than 10 of these larger contigs, while Flye with default and both LR assemblers with metagenome-optimized settings and sub-sampled reads yielded 10-21 (Dataset S1). Again, we acknowledge that SR-first hybrid assemblers produced the highest-quality long contigs, with 4 contigs from Unicycler and 2 from OPERA-MS representing nearly complete bacterial genomes with >90% completion and <5% contamination (Dataset S1). Still, LR assemblers produced more than twice the number of these contigs. Additionally, there were several contigs assembled by Canu and Flye that had unusually large estimated contamination values (12-74%, Dataset S1), primarily in sub-sampled read assemblies and Canu assemblies. While it is possible that marker gene redundancy varies greatly by lineage and reaches >10% in isolates, it is also possible that these may be erroneous chimeric contigs composed of at least two genomes, or caused by small-scale errors that lead to gene fragmentation known to affect LRs and their assemblies. In contrast to the circular contigs, there was a larger difference in the estimated completion of these long contigs between bioreactors rather than between LR assemblers – a mean completion of 17.9% for contigs with bacterial phylogenetic markers in the OLR compared to 28.6% in the NLR (Dataset S1). The number of contigs matching this criterion was nearly 1.7-fold greater in the NLR than OLR (Dataset S1), a phenomenon that we infer to be an artifact of the greater read depth for the NLR.

In summary, the assembly strategy has a profound effect on the outcome of the initial assemblies, from overall size to contiguity and quality, as expected from most benchmarking studies. SR-first hybrid assemblies immediately yield high-quality microbial genomic data, but only for a few members of the community while the rest remain fragmented. On the other hand, LR assemblies produce larger and more contiguous contigs, which require further processing to yield high-quality microbial genomic data. The benefit of these LR assemblies is that given their size and contiguity, they can theoretically enable the reconstruction of larger portions of the microbial communities. The difference between SR and LR assemblies in potential nearl-complete microbial genomic information was most apparent when comparing the number of larger circular contigs.

*Additional information on microbial community beta diversity*

On average, 21.5 *rpoB* genes were assembled initially, though there were clear differences in both bioreactor and assembler – the NLR assemblies contained more *rpoB* genes indicating a more diverse system, and Flye led to the recovery of more *rpoB* genes, thus better capturing the communities within both systems (Dataset S1, Fig. S4). The average *rpoB* gene recovery increased to 24.2 with LR correction alone, but to at least 25 after just one SR polishing iteration without LR correction (Dataset S1). Besides increasing in count, the average length of these genes increased 3.3-fold after SR polishing alone, 3.4-fold after both LR correction and SR polishing, but only 1.2-fold after LR correction alone (Dataset S1). Intriguingly, the Canu assembly of the NLR had on average 1.2-fold longer *rpoB* genes after SR polishing compared to the Flye assembly (Dataset S1), suggesting that the choice of assembler may have a major impact even on gene-centric community-level analyses. We note that there were on average 8 more *rpoB* genes than automated MQ bins, and therefore genomic data was recovered for only about 70% of the communities after correction and polishing (Dataset S1). Together with the fact that prior SR sequencing and assembly of the NLR yielded 49 unique *rpoB* genes79, this demonstrates the relative weakness of LR assemblies ability to capture the same breadth and depth of community members, presumably due to a much more shallow sequencing depth. However, the SR-only and SR-first hybrid assemblies also did not recover this quantity of *rpoB* genes, suggesting that the community may have simplified since the previous study. LR assemblies with LR correction and SR polishing yielded similar quantities as SR assemblies, suggesting that the recovery was not dataset dependent (Dataset S1, Fig. S5).

As expected based on the technological differences between LR and SR sequencing platforms, mean depths of *rpoB*-containing contigs were slightly higher for SRs than LRs, with 27.9 and 21.5 in the OLR, and 23.5 and 19.5 in the NLR, respectively (Dataset S1, Fig. S6). Furthermore, both LR and SR recruitment depths were lower for reads mapped to the opposite bioreactor’s assembly, indicating that while there is some overlap as expected given that both reactor systems were inoculated with biomass from the same source, the communities were distinct. In fact, there was a strong correlation between the LR and SR depths themselves (adjusted R2 >0.97, p-value <<0.05, data not shown). However, the mean depth of both LRs and SRs of the same bioreactor for *rpoB*-containing contigs was reduced by SR polishing by 12.5% and 15.2% respectively (Dataset S1). This phenomenon possibly occurred because lower abundance community members with more erroneously assembled sequences required SR polishing for their *rpoB* genes to be identified. However, we also note the possibility that reads were incorrectly aligned to erroneous sequences causing depth variation, but this was not explored further. Additionally, while SR depth was greater than LR for the same bioreactor assembly, more LRs than SRs from the other bioreactor could be recruited to the opposite bioreactor’s assembly. This, like the ability to recruit reads from the opposite bioreactor generally, may be caused by the presence of similar but distinct strains in the two reactor systems and more relaxed alignment thresholds for LR compared to SR recruitment.

Both LR correction and SR polishing caused substantial shifts in the observed bioreactor communities. On the one hand, LR correction was noisy and communities remained separated rather than forming tight clusters (Fig. 5). On the other hand, SR polishing without and with prior LR correction led to major community shifts followed by convergence. There was a dependence on both bioreactor and assembler, for example Canu assemblies appear to overlap more after some LR correction than without, which was not as apparent for the Flye assemblies. This effect was likely caused by the lower diversity captured by Canu assemblers rather than a greater improvement by LR correction of Canu than Flye assemblies. Furthermore, the 10 iterations of LR correction for the OLR Flye assembly deviated substantially from the rest of the assemblies but still converged via a distinct path during SR polishing. Thus, while LR correction does affect the recovery efficiency of the community members, SR polishing again causes the greatest and least noisy changes that yield the most consistent results and likely the best representation of the microbial community present.

*Additional information on automated bin recovery*

Automated binning was dependent on both bioreactor and assembler, with minimal improvement from LR correction and major improvements from SR polishing. Initial LR assemblies led to the recovery of between 2 and 16 medium-quality or better (MQ) bacterial genomic bins. Both bioreactor and assembler had a major influence, with approximately 1.9-fold more MQ bins recovered from the initial NLR assemblies compared to the OLR assemblies, and 2.5-fold more MQ bins recovered from Flye compared to Canu assemblies (Dataset S1). On average, over all LR correction iterations, the MQ bin yield increased by less than 3 to 12.3 (Dataset S1, Fig. S7). Consistent with other results, LR correction remained noisy after the first iteration: on average one iteration of LR correction allowed 3 additional MQ bins to be recovered, increased the number of contigs in MQ bins from 33.8 to 75.8, and increased the bps in MQ bins from 39,179,008 to 51,993,034 (Dataset S1). These improvements decreased after the second iteration, reached similar values again after the third iteration as after the first, and were overall somewhat unstable during LR correction (Dataset S1, Fig. 4, Fig. S7). SR polishing without and with prior LR correction on average allowed 17.6 and 19.1 MQ automated bins to be recovered, yielded 188 and 297 contigs comprising 72,619,837 and 78,451,859 bps in MQ bins, and lead to an increase in completeness scores to 82.9% and 79.7%, respectively (Dataset S1). Again, the majority of improvement occurred within the first 3 iterations of SR polishing, with diminishing returns after subsequent iterations (Fig. 4, Dataset S1, Fig. S7). We acknowledge that the mean completeness scores of MQ bins were lower from assemblies that were both LR corrected and SR polished rather than SR polished alone. Given the increase in MQ bin count, as well as the number of contigs and bps in MQ bins, it is most likely that lower quality bins or inaccurate contigs improved to meet the MQ bin threshold, thereby still achieving a better representation of the microbial community. Most importantly, we note that LR assemblies with LR correction and SR polishing yielded more medium- and high-quality automated bins than SR-only or SR-first hybrid assemblies (Dataset S1, Fig. S8).

Reference-agnostic bacterial marker gene redundancy at the assembly levels estimated using CheckM followed similar patterns as *rpoB* gene recovery. First, initial LR assemblies tended to have the lowest redundancy, *i.e.*, the fewest number of the same marker gene in the assembly (Fig. S7). Furthermore, the Canu assembly of the OLR lacked 5/104 marker genes altogether, while at least two copies of each of the 104 marker genes were identified in the Flye assembly of the NLR. Second, LR correction alone was noisy and insufficient to increase redundancy to 5 or more copies of each gene; for all assemblies except the NLR Flye assembly, the average number of genes present in 5+ copies was 99.2/104 after LR correction compared to 97/104 prior to LR correction (Dataset S1). Third, SR polishing led to the identification of at least five copies of each marker gene and increased redundancy to essentially the maximum recorded by the third iteration, regardless of prior LR correction (Fig. S7). Fourth, preceding SR polishing by any LR correction increased the total estimated redundancy, *i.e.*, CheckM contamination score, compared to SR polishing of the initial assemblies from 2,558% to 2,670% on average (Dataset S1), demonstrating a benefit of at least some LR correction to increase marker gene redundancy.

Intriguingly, we noted a strong correlation (adjusted R2 ≧0.85, p-value <<0.05) between the observed redundancy of the full assembly, *i.e.*,the sum of CheckM completion and contamination scores, and the number of medium-quality or better automated bins. This suggests that assembly redundancy may be used as a predictor for genome recovery (Fig. S9). We do acknowledge that this relationship was largely driven by large improvements as a result of SR polishing, as indicated by the data typically clustering into two distinct groups based on the iterations of LR correction. Statistical testing with fewer SR polishing iterations or different assembly characteristics yielded sometimes weaker (adjusted R2 ≥0.7) but still significant (p-value <0.05) correlations (data not shown), indicating an overall robust relationship. Taken together, both marker gene redundancy for the entire assembly and automated bin quality vastly improved by SR polishing with some benefit also gained from LR correction.

*Additional information on gene fragmentation*

Initial LR assemblies contained, on average, 329,650 coding genes and 136,613,267 bps in these coding genes, or approximately 76% of all assembled bps (Dataset S1). There were clear differences in the coding gene contents of the assemblies due to both bioreactor and assembler. The OLR assemblies contained on average 281,935 genes with 114,083,729 bps in them while the NLR assemblies contained 377,364 genes with 159,142,804 bps. Canu assemblies contained on average 313,901 genes with 122,320,542 bps in them while the Flye assembles contained 345,398 genes with 150,905,992 bps in them (Dataset S1). These differences are consistent with the differences between assemblies. While the greater gene yields in the NLR assemblies over the OLR assemblies are likely due to the greater sequencing depth, the higher yields from Flye over Canu assemblies suggest that Flye may have generated higher quality assemblies.

Gene fragmentation was slightly reduced by LR correction and drastically by SR polishing. LR correction alone led to only moderate improvements in gene fragmentation, reducing the gene count on average to 325,330 and increasing bps in genes to 139,661,940, approximately a 1.3% and 2.2% change, respectively. On the other hand, SR polishing alone on average reduced the gene count to 266,977 and simultaneously increased the bps in genes to 153,102,694, approximately a change of 19% and 12%, respectively, comprising approximately 85% of all assembled bps on average (Dataset S1). This improvement was slightly more pronounced when implementing SR polishing after any LR correction, reducing the gene count to 265,953 and increasing the bps in genes to 154,819,887 (Dataset S1). Across several fractions of the assemblies, *i.e.*, circular or long contigs that may represent essentially complete bacterial replicons (chromosomes or plasmids), and MQ bins, the median quantity of coding genes and bps in coding genes normalized to the Mbps contig length quickly saturates after about two to four SR polishing iterations but never due to LR correction alone (Dataset S1, Fig. S10). Therefore, not only does the improvement occur throughout the assembly, but these improvements are also apparent, if not to a greater magnitude, for subsets of the assemblies most tractable for downstream analyses.

Additionally, these same trends hold true when looking at the gene density of the assemblies. After a single iteration, the median total number of genes per contig normalized to Mbp of sequence increased on average by 38 genes (~2.5%) due to LR correction but decreased on average by 98 genes (~6.3%) due to SR polishing (Dataset S1, Fig. S11). Again, after one iteration, the median total bps in genes per contig normalized to Mbp of sequence increased due to both LR correction and SR polishing, by 14,477 (~2.3%) and 22,722 (~3.5%) bps on average, respectively (Dataset S1). Over all iterations of error fixing, LR correction alone led to an average increase of 33 genes and 14,184 bps in genes, while SR polishing without LR correction led to the largest decrease in genes (166, ~10.7%) and a moderate increase in bps in genes (31,486, ~4.9%) and SR polishing with at least some LR correction led to a large decrease in genes (145, ~9.4%) and the largest increase in bps in genes (49,332, ~7.7%; Dataset S1).

According to BUSCO, which identifies 124 bacterial marker genes and assesses their fragmentation and redundancy, all LR assemblies initially contained fragmented bacterial marker genes, which were not resolved by LR correction alone. Consistent with general assembly statistics, initial Flye assemblies contained on average 3 additional complete (*i.e.*, not fragmented) and 22 additional recovered (*i.e.*, not missing) marker genes than the initial Canu assemblies (Dataset S1, Fig. S11). Similarly, there were on average 1.5 more complete and 24 more recovered marker genes in the NLR compared to the OLR, again likely due to the greater read depth (Dataset S1). Even one iteration of LR correction increased complete and recovered bacterial marker genes, by an average of 2 and 10, respectively, but it was also evident that up to 10 iterations of LR correction could not fully resolve these errors and led to noisy patterns. These observations were at least partially expected because LR correction still uses the high error rate LRs and is typically used to fix slightly larger scale, *i.e.*,structural, errors.

Contrastingly, SR polishing effectively resolved gene fragmentation when viewed as an aggregate over the entire assembly. Without any LR correction, only one iteration of SR polishing was sufficient to recover at least one complete copy of all tracked marker genes. Furthermore, this trend was consistent after every LR correction step tested, suggesting that the SR polishing outcomes are more stable than LR correction, as expected because they tend to fix smaller scale, *i.e.*, single or few bps errors. We additionally note that for the Flye assembly of the OLR, more markers were complete and duplicated without LR correction steps than with 2, 5, or 10 iterations, in contrast to the other three LR assemblies. This may be the result of the LR corrections resolving an inaccuracy, in which a large redundant sequence was collapsed (more evidence below), but this phenomenon was not extensively followed. In summary, it was clear that a few iterations of SR polishing were sufficient to lead to a reduction of fragmented marker genes, while LR correction demonstrated diminishing returns and noisy patterns.

Corroborating the trends observed in BUSCO, the broader reference comparison with IDEEL showed that initial assemblies contained many fragmented genes, but SR polishing led to major improvements in gene length. (Dataset S1, Fig. S12). On average, only about 6.8% of coding genes in the initial assemblies were within 5% of the length of their most similar reference sequence (Dataset S1, Fig. S13). LR correction alone increased this proportion only to 7.9% of coding genes, but just two rounds of SR polishing increased the proportion of coding genes with lengths within 5% of their most similar reference to 24.3% (Dataset S1, Figs. S12, S13). There was a slight improvement by the third iteration of SR polishing to 24.8% and with subsequent SR polishing, diminishing returns to a maximum of 25.0%. Apparently, a large fraction of the most fragmented genes occurred on contigs with low (<1x) SR depth, even after SR polishing, as removing these contigs and assessing the assemblies with IDEEL again yielded approximately 1.77-fold increases in the proportion of nearly full-length genes on average (Dataset S1, Fig. S13). These minimum SR-depth filtered assemblies approached similar percentages of nearly full-length genes (~46%) in SR-only and SR-first hybrid assemblies (51-63%, Dataset S1, Fig. S13).

*Additional information on short read recruitment*

The SR recruitment of initial LR assemblies recapitulated many of the other observed patterns, for example major differences between assemblers but less pronounced differences between bioreactors. The OLR assemblies recruited 451,908,712 SR bps, 4.88% of SRs were ambiguously aligned, and 1,378 contigs recruited no SRs (Dataset S1). The NLR assemblies recruited 492,299,062 SR bps, with 3.38% of SRs ambiguously aligned, and 2,180 contigs not recruiting any SRs (Dataset S1). Flye assemblies recruited 617,179,142 SR bps, with 4.76% of SRs ambiguously aligned, and 405 contigs not recruiting any SRs, while the Canu assemblies recruited 327,028,632 SR bps, with 3.50% of SRs ambiguously aligned, and 3,154 contigs not recruiting any SRs (Dataset S1). Thus, sequencing depth had a smaller effect on SR recruitment than assembler. While Flye assemblies were able to recruit more SR and to more of the contigs, there were also more ambiguously aligned reads, suggesting that much of the assembly may be higher quality and contain similar yet distinct strains, or could contain a large duplication.

Consistent with prior results and expectations, LR correction tended to make only minor improvements to SR recruitment, but SR polishing led to major improvements. After only LR correction of the Flye assemblies, the total SR bps recruited changed negligibly, *i.e.*, <5% increase or decrease, but increased to 596,399,632 bps for Canu assemblies on average (Dataset S1). After SR polishing, Canu assemblies on average recruited 1,430,808,700 total SR bps and Flye assemblies 1,456,688,314 total SR bps, representing a 4.38-fold and 2.36-fold increase, respectively (Dataset S1).

Normalizing for assembly sizes may increase resolution to help assess the distribution of SR recruitment. The median SR bps recruited normalized to contig length per Mbp for Flye assemblies increased from 29,717 to 37,170 due to LR correction alone, which is a much larger apparent difference (25.1%) than total SR bps recruited (Dataset S1). However, the median SR bps recruited normalized to contig length per Mbp for Canu assemblies did not increase from 0 due to LR correction, highlighting issues of LR-assembled contigs that unexpectedly do not recruit any SR bps. Fortunately, LR correction led to 31,453 greater median SR recruited bps per contig per Mbp after subsequent SR polishing (93,579) than compared to SR polishing alone (62,126; Dataset S1), indicating both a benefit of some LR correction prior to SR polishing and that SR polishing was the major driver of improved SR recruitment. Similarly, for Flye assemblies, the median SR bps per contig per Mbp increased to 223,421 with SR polishing alone and to 249,896 with LR correction preceding SR polishing, or approximately 7.52- and 8.41-fold increases, respectively (Dataset S1). For all assemblies, SR recruitment largely saturated after the third iteration of SR polishing, leading to an average 3.06-fold increase from 472,103,888 to 1,445,120,660 total SR bps recruited, and a 10.6-fold increase from 14,859 to 157,255 median SR bps per contig per Mbp for all assemblies (Dataset S1).

The ambiguity of SR recruitment also followed similar patterns as the total bps in reads per contig normalized to Mbp. Assemblies typically started with 3.2-3.6% of the total reads mapping ambiguously, but 6.3% in the Flye assembly of the OLR (Dataset S1), presumably due to a large-scale duplication that was collapsed by minimal LR correction or reconstruction of multiple similar strains. LR correction and SR polishing alone both reduced the fraction of ambiguously mapped reads by approximately 30-50%, but only when combining both LR correction and SR polishing was ambiguity reduced maximally by about 70%, or to 1.2-1.9% of total mapped reads (Dataset S1). Most of this ambiguity reduction occurred within the first one or two rounds of SR correction. Therefore, given both the overall increase in SR recruitment and simultaneous decrease in SR ambiguity, at least one iteration of LR correction and at least two iterations of SR polishing vastly improved the accuracy of the assembly. However, it should be noted that we observed diminishing returns, especially beyond 5 iterations of SR polishing.

The number of contigs without any SR recruitment generally decreased in all correction approaches tested, but again primarily due to SR polishing. Canu assemblies, initially containing more contigs than Flye assemblies (see prior section), also contained more contigs that did not recruit any SRs (Canu assemblies: 2,408/4,187 [OLR] and 3,899/6,951 [NLR]; Flye assemblies: 348/1,487 [OLR] and 462/2,301 [NLR]), with fractions of contigs not recruiting any SR of 57% and 22% for the Canu and Flye assemblies, respectively (Dataset S1). On average over all ten iterations of LR correction for both bioreactors and assemblers, the number of contigs that did not recruit any SR decreased from 1,779 to 1,630 (8% reduction). Without LR correction, SR polishing reduced these to 1,268 (29% reduction), and to 1,184 (33% reduction) with at least two preceding LR correction iterations (Dataset S1). These data demonstrated that SR polishing causes large decreases in the number of contigs recruiting no SRs and a slight benefit of some LR correction prior to SR polishing. The largest improvements occurred after just one iteration of SR polishing, with only marginal improvements beyond four iterations regardless of bioreactor or assembler.

ALE scores, which are calculated from short read alignments themselves103, only improved due to SR polishing. Because the raw ALE score itself is not particularly informative103, relative scores were calculated from raw scores as the inverse of the LR corrected and/or SR-polished assembly divided by the initial assembly so that changes could be compared across assemblers and an increase in relative score meant an increase in assembly quality. ON average, LR correction alone actually led to essentially no change in relative ALE scores. However, SR polishing, regardless of preceding of LR correction, led to a 5% increase in relative ALE score (Fig. S14). We found that the proportion of total bps in aligned SR was strongly correlated to the relative ALE scores (adjusted R2 ≧0.87, p-adj <<0.05; Dataset S1, Fig. S14), suggesting that it may not be necessary to calculate ALE scores to assess the changes in quality during LR correction and/or SR polishing. Similar to IDEEL scores, contigs with low SR depth seemed to contribute to poor ALE scores, as removal led to large improvements in ALE scores (1.2-1.4-fold) relative to the full assemblies, and even raw ALE scores approaching those of SR-alone and SR-first hybrid assemblies (Fig. S15).

**References**

(1) Lee, J. Y.; Kong, M.; Oh, J.; Lim, J.; Chung, S. H.; Kim, J.-M.; Kim, J.-S.; Kim, K.-H.; Yoo, J.-C.; Kwak, W. Comparative Evaluation of Nanopore Polishing Tools for Microbial Genome Assembly and Polishing Strategies for Downstream Analysis. *Sci Rep* **2021**, *11* (1), 20740. https://doi.org/10.1038/s41598-021-00178-w.

(2) Chen, Z.; Erickson, D. L.; Meng, J. Benchmarking Hybrid Assembly Approaches for Genomic Analyses of Bacterial Pathogens Using Illumina and Oxford Nanopore Sequencing. *BMC Genomics* **2020**, *21* (1), 631. https://doi.org/10.1186/s12864-020-07041-8.

(3) Dohm, J. C.; Peters, P.; Stralis-Pavese, N.; Himmelbauer, H. Benchmarking of Long-Read Correction Methods. *NAR Genomics and Bioinformatics* **2020**, *2* (2), lqaa037. https://doi.org/10.1093/nargab/lqaa037.

(4) Meslier, V.; Quinquis, B.; Da Silva, K.; Plaza Oñate, F.; Pons, N.; Roume, H.; Podar, M.; Almeida, M. Benchmarking Second and Third-Generation Sequencing Platforms for Microbial Metagenomics. *Sci Data* **2022**, *9* (1), 694. https://doi.org/10.1038/s41597-022-01762-z.

(5) Pagès-Gallego, M.; de Ridder, J. Comprehensive Benchmark and Architectural Analysis of Deep Learning Models for Nanopore Sequencing Basecalling. *Genome Biology* **2023**, *24* (1), 71. https://doi.org/10.1186/s13059-023-02903-2.

(6) Wick, R. R.; Holt, K. E. Benchmarking of Long-Read Assemblers for Prokaryote Whole Genome Sequencing. F1000Research February 1, 2021. https://doi.org/10.12688/f1000research.21782.4.

(7) Zhang, Z.; Yang, C.; Veldsman, W. P.; Fang, X.; Zhang, L. Benchmarking Genome Assembly Methods on Metagenomic Sequencing Data. *Briefings in Bioinformatics* **2023**, *24* (2), bbad087. https://doi.org/10.1093/bib/bbad087.

(8) Wick, R. R.; Judd, L. M.; Cerdeira, L. T.; Hawkey, J.; Méric, G.; Vezina, B.; Wyres, K. L.; Holt, K. E. Trycycler: Consensus Long-Read Assemblies for Bacterial Genomes. *Genome Biology* **2021**, *22* (1), 266. https://doi.org/10.1186/s13059-021-02483-z.

(9) Vaser, R.; Sovic, I.; Nagarajan, N.; Sikic, M. Fast and Accurate de Novo Genome Assembly from Long Uncorrected Reads. *Genome Res.* **2017**, gr.214270.116. https://doi.org/10.1101/gr.214270.116.

(10) Kundu, R.; Casey, J.; Sung, W.-K. HyPo: Super Fast &amp; Accurate Polisher for Long Read Genome Assemblies. bioRxiv December 20, 2019, p 2019.12.19.882506. https://doi.org/10.1101/2019.12.19.882506.

(11) Ruan, J.; Li, H. Fast and Accurate Long-Read Assembly with Wtdbg2. *Nat Methods* **2020**, *17* (2), 155–158. https://doi.org/10.1038/s41592-019-0669-3.

(12) Zimin, A. V.; Salzberg, S. L. The Genome Polishing Tool POLCA Makes Fast and Accurate Corrections in Genome Assemblies. *PLOS Computational Biology* **2020**, *16* (6), e1007981. https://doi.org/10.1371/journal.pcbi.1007981.

(13) Walker, B. J.; Abeel, T.; Shea, T.; Priest, M.; Abouelliel, A.; Sakthikumar, S.; Cuomo, C. A.; Zeng, Q.; Wortman, J.; Young, S. K.; Earl, A. M. Pilon: An Integrated Tool for Comprehensive Microbial Variant Detection and Genome Assembly Improvement. *PLOS ONE* **2014**, *9* (11), e112963. https://doi.org/10.1371/journal.pone.0112963.

(14) Kolmogorov, M.; Bickhart, D. M.; Behsaz, B.; Gurevich, A.; Rayko, M.; Shin, S. B.; Kuhn, K.; Yuan, J.; Polevikov, E.; Smith, T. P. L.; Pevzner, P. A. metaFlye: Scalable Long-Read Metagenome Assembly Using Repeat Graphs. *Nat Methods* **2020**, *17* (11), 1103–1110. https://doi.org/10.1038/s41592-020-00971-x.

(15) Brown, C. L.; Keenum, I. M.; Dai, D.; Zhang, L.; Vikesland, P. J.; Pruden, A. Critical Evaluation of Short, Long, and Hybrid Assembly for Contextual Analysis of Antibiotic Resistance Genes in Complex Environmental Metagenomes. *Scientific Reports* **2021**, *11* (1), 3753. https://doi.org/10.1038/s41598-021-83081-8.

(16) Sereika, M.; Kirkegaard, R. H.; Karst, S. M.; Michaelsen, T. Y.; Sørensen, E. A.; Wollenberg, R. D.; Albertsen, M. Oxford Nanopore R10.4 Long-Read Sequencing Enables the Generation of near-Finished Bacterial Genomes from Pure Cultures and Metagenomes without Short-Read or Reference Polishing. *Nature Methods* **2022**, *19* (7), 823–826. https://doi.org/10.1038/s41592-022-01539-7.

(17) Kang, D. D.; Li, F.; Kirton, E.; Thomas, A.; Egan, R.; An, H.; Wang, Z. MetaBAT 2: An Adaptive Binning Algorithm for Robust and Efficient Genome Reconstruction from Metagenome Assemblies. *PeerJ* **2019**, *7*, e7359. https://doi.org/10.7717/peerj.7359.

(18) Nurk, S.; Meleshko, D.; Korobeynikov, A.; Pevzner, P. A. metaSPAdes: A New Versatile Metagenomic Assembler. *Genome Res* **2017**, *27* (5), 824–834. https://doi.org/10.1101/gr.213959.116.

(19) Sieber, C. M. K.; Probst, A. J.; Sharrar, A.; Thomas, B. C.; Hess, M.; Tringe, S. G.; Banfield, J. F. Recovery of Genomes from Metagenomes via a Dereplication, Aggregation and Scoring Strategy. *Nat Microbiol* **2018**, *3* (7), 836–843. https://doi.org/10.1038/s41564-018-0171-1.

(20) Antipov, D.; Korobeynikov, A.; McLean, J. S.; Pevzner, P. A. hybridSPAdes: An Algorithm for Hybrid Assembly of Short and Long Reads. *Bioinformatics* **2016**, *32* (7), 1009–1015. https://doi.org/10.1093/bioinformatics/btv688.

(21) Koren, S.; Walenz, B. P.; Berlin, K.; Miller, J. R.; Bergman, N. H.; Phillippy, A. M. Canu: Scalable and Accurate Long-Read Assembly via Adaptive k-Mer Weighting and Repeat Separation. *Genome Res.* **2017**, *27* (5), 722–736. https://doi.org/10.1101/gr.215087.116.

(22) Zhang, Y.; Akdemir, A.; Tremmel, G.; Imoto, S.; Miyano, S.; Shibuya, T.; Yamaguchi, R. Nanopore Basecalling from a Perspective of Instance Segmentation. *BMC Bioinformatics* **2020**, *21* (3), 136. https://doi.org/10.1186/s12859-020-3459-0.

(23) Wick, R. R.; Judd, L. M.; Holt, K. E. Performance of Neural Network Basecalling Tools for Oxford Nanopore Sequencing. *Genome Biology* **2019**, *20* (1), 129. https://doi.org/10.1186/s13059-019-1727-y.

(24) Tao, Y.; Xun, F.; Zhao, C.; Mao, Z.; Li, B.; Xing, P.; Wu, Q. L. Improved Assembly of Metagenome-Assembled Genomes and Viruses in Tibetan Saline Lake Sediment by HiFi Metagenomic Sequencing. *Microbiology Spectrum* **2022**, *11* (1), e03328-22. https://doi.org/10.1128/spectrum.03328-22.

(25) Gounot, J.-S.; Chia, M.; Bertrand, D.; Saw, W.-Y.; Ravikrishnan, A.; Low, A.; Ding, Y.; Ng, A. H. Q.; Tan, L. W. L.; Teo, Y.-Y.; Seedorf, H.; Nagarajan, N. Genome-Centric Analysis of Short and Long Read Metagenomes Reveals Uncharacterized Microbiome Diversity in Southeast Asians. *Nat Commun* **2022**, *13* (1), 6044. https://doi.org/10.1038/s41467-022-33782-z.

(26) Van Goethem, M. W.; Osborn, A. R.; Bowen, B. P.; Andeer, P. F.; Swenson, T. L.; Clum, A.; Riley, R.; He, G.; Koriabine, M.; Sandor, L.; Yan, M.; Daum, C. G.; Yoshinaga, Y.; Makhalanyane, T. P.; Garcia-Pichel, F.; Visel, A.; Pennacchio, L. A.; O’Malley, R. C.; Northen, T. R. Long-Read Metagenomics of Soil Communities Reveals Phylum-Specific Secondary Metabolite Dynamics. *Commun Biol* **2021**, *4* (1), 1–10. https://doi.org/10.1038/s42003-021-02809-4.

(27) Bertrand, D.; Shaw, J.; Kalathiyappan, M.; Ng, A. H. Q.; Kumar, M. S.; Li, C.; Dvornicic, M.; Soldo, J. P.; Koh, J. Y.; Tong, C.; Ng, O. T.; Barkham, T.; Young, B.; Marimuthu, K.; Chng, K. R.; Sikic, M.; Nagarajan, N. Hybrid Metagenomic Assembly Enables High-Resolution Analysis of Resistance Determinants and Mobile Elements in Human Microbiomes. *Nat Biotechnol* **2019**, *37* (8), 937–944. https://doi.org/10.1038/s41587-019-0191-2.

(28) Zhang, Z.-F.; Liu, L.-R.; Pan, Y.-P.; Pan, J.; Li, M. Long-Read Assembled Metagenomic Approaches Improve Our Understanding on Metabolic Potentials of Microbial Community in Mangrove Sediments. *Microbiome* **2023**, *11* (1), 188. https://doi.org/10.1186/s40168-023-01630-x.

(29) Shafin, K.; Pesout, T.; Chang, P.-C.; Nattestad, M.; Kolesnikov, A.; Goel, S.; Baid, G.; Kolmogorov, M.; Eizenga, J. M.; Miga, K. H.; Carnevali, P.; Jain, M.; Carroll, A.; Paten, B. Haplotype-Aware Variant Calling with PEPPER-Margin-DeepVariant Enables High Accuracy in Nanopore Long-Reads. *Nat Methods* **2021**, *18* (11), 1322–1332. https://doi.org/10.1038/s41592-021-01299-w.

(30) Chen, Z.; Erickson, D. L.; Meng, J. Polishing the Oxford Nanopore Long-Read Assemblies of Bacterial Pathogens with Illumina Short Reads to Improve Genomic Analyses. *Genomics* **2021**, *113* (3), 1366–1377. https://doi.org/10.1016/j.ygeno.2021.03.018.

(31) Medaka, 2023. https://github.com/nanoporetech/medaka (accessed 2023-11-21).

(32) Chen, Y.; Nie, F.; Xie, S.-Q.; Zheng, Y.-F.; Dai, Q.; Bray, T.; Wang, Y.-X.; Xing, J.-F.; Huang, Z.-J.; Wang, D.-P.; He, L.-J.; Luo, F.; Wang, J.-X.; Liu, Y.-Z.; Xiao, C.-L. Efficient Assembly of Nanopore Reads via Highly Accurate and Intact Error Correction. *Nat Commun* **2021**, *12* (1), 60. https://doi.org/10.1038/s41467-020-20236-7.

(33) Huang, Y.-T.; Liu, P.-Y.; Shih, P.-W. Homopolish: A Method for the Removal of Systematic Errors in Nanopore Sequencing by Homologous Polishing. *Genome Biology* **2021**, *22* (1), 95. https://doi.org/10.1186/s13059-021-02282-6.

(34) Firtina, C.; Kim, J. S.; Alser, M.; Senol Cali, D.; Cicek, A. E.; Alkan, C.; Mutlu, O. Apollo: A Sequencing-Technology-Independent, Scalable and Accurate Assembly Polishing Algorithm. *Bioinformatics* **2020**, *36* (12), 3669–3679. https://doi.org/10.1093/bioinformatics/btaa179.

(35) Hu, K.; Huang, N.; Zou, Y.; Liao, X.; Wang, J. MultiNanopolish: Refined Grouping Method for Reducing Redundant Calculations in Nanopolish. *Bioinformatics* **2021**, *37* (17), 2757–2760. https://doi.org/10.1093/bioinformatics/btab078.

(36) Hu, J.; Fan, J.; Sun, Z.; Liu, S. NextPolish: A Fast and Efficient Genome Polishing Tool for Long-Read Assembly. *Bioinformatics* **2020**, *36* (7), 2253–2255. https://doi.org/10.1093/bioinformatics/btz891.

(37) Huang, N.; Nie, F.; Ni, P.; Luo, F.; Gao, X.; Wang, J. NeuralPolish: A Novel Nanopore Polishing Method Based on Alignment Matrix Construction and Orthogonal Bi-GRU Networks. *Bioinformatics* **2021**, *37* (19), 3120–3127. https://doi.org/10.1093/bioinformatics/btab354.

(38) Morisse, P.; Marchet, C.; Limasset, A.; Lecroq, T.; Lefebvre, A. Scalable Long Read Self-Correction and Assembly Polishing with Multiple Sequence Alignment. *Sci Rep* **2021**, *11* (1), 761. https://doi.org/10.1038/s41598-020-80757-5.

(39) Warren, R. L.; Coombe, L.; Mohamadi, H.; Zhang, J.; Jaquish, B.; Isabel, N.; Jones, S. J. M.; Bousquet, J.; Bohlmann, J.; Birol, I. ntEdit: Scalable Genome Sequence Polishing. *Bioinformatics* **2019**, *35* (21), 4430–4432. https://doi.org/10.1093/bioinformatics/btz400.

(40) Shafin, K.; Pesout, T.; Lorig-Roach, R.; Haukness, M.; Olsen, H. E.; Bosworth, C.; Armstrong, J.; Tigyi, K.; Maurer, N.; Koren, S.; Sedlazeck, F. J.; Marschall, T.; Mayes, S.; Costa, V.; Zook, J. M.; Liu, K. J.; Kilburn, D.; Sorensen, M.; Munson, K. M.; Vollger, M. R.; Monlong, J.; Garrison, E.; Eichler, E. E.; Salama, S.; Haussler, D.; Green, R. E.; Akeson, M.; Phillippy, A.; Miga, K. H.; Carnevali, P.; Jain, M.; Paten, B. Nanopore Sequencing and the Shasta Toolkit Enable Efficient de Novo Assembly of Eleven Human Genomes. *Nat Biotechnol* **2020**, *38* (9), 1044–1053. https://doi.org/10.1038/s41587-020-0503-6.

(41) Li, H. Minimap and Miniasm: Fast Mapping and de Novo Assembly for Noisy Long Sequences. *Bioinformatics* **2016**, *32* (14), 2103–2110. https://doi.org/10.1093/bioinformatics/btw152.

(42) Hu, J.; Wang, Z.; Sun, Z.; Hu, B.; Ayoola, A. O.; Liang, F.; Li, J.; Sandoval, J. R.; Cooper, D. N.; Ye, K.; Ruan, J.; Xiao, C.-L.; Wang, D.-P.; Wu, D.-D.; Wang, S. An Efficient Error Correction and Accurate Assembly Tool for Noisy Long Reads. bioRxiv March 12, 2023, p 2023.03.09.531669. https://doi.org/10.1101/2023.03.09.531669.

(43) Vaser, R.; Šikić, M. Time- and Memory-Efficient Genome Assembly with Raven. *Nat Comput Sci* **2021**, *1* (5), 332–336. https://doi.org/10.1038/s43588-021-00073-4.

(44) Lv, X.; Chen, Z.; Lu, Y.; Yang, Y. An End-to-End Oxford Nanopore Basecaller Using Convolution-Augmented Transformer. bioRxiv November 10, 2020, p 2020.11.09.374165. https://doi.org/10.1101/2020.11.09.374165.

(45) Miculinić, N.; Ratković, M.; Šikić, M. MinCall - MinION End2end Convolutional Deep Learning Basecaller. arXiv April 22, 2019. https://doi.org/10.48550/arXiv.1904.10337.

(46) Zeng, J.; Cai, H.; Peng, H.; Wang, H.; Zhang, Y.; Akutsu, T. Causalcall: Nanopore Basecalling Using a Temporal Convolutional Network. *Frontiers in Genetics* **2020**, *10*.

(47) Huang, N.; Nie, F.; Ni, P.; Luo, F.; Wang, J. SACall: A Neural Network Basecaller for Oxford Nanopore Sequencing Data Based on Self-Attention Mechanism. *IEEE/ACM Transactions on Computational Biology and Bioinformatics* **2022**, *19* (1), 614–623. https://doi.org/10.1109/TCBB.2020.3039244.

(48) Konishi, H.; Yamaguchi, R.; Yamaguchi, K.; Furukawa, Y.; Imoto, S. Halcyon: An Accurate Basecaller Exploiting an Encoder–Decoder Model with Monotonic Attention. *Bioinformatics* **2021**, *37* (9), 1211–1217. https://doi.org/10.1093/bioinformatics/btaa953.

(49) Wu, Y.-W.; Tang, Y.-H.; Tringe, S. G.; Simmons, B. A.; Singer, S. W. MaxBin: An Automated Binning Method to Recover Individual Genomes from Metagenomes Using an Expectation-Maximization Algorithm. *Microbiome* **2014**, *2* (1), 26. https://doi.org/10.1186/2049-2618-2-26.

(50) Uritskiy, G. V.; DiRuggiero, J.; Taylor, J. MetaWRAP—a Flexible Pipeline for Genome-Resolved Metagenomic Data Analysis. *Microbiome* **2018**, *6* (1), 158. https://doi.org/10.1186/s40168-018-0541-1.

(51) Wang, Z.; Huang, P.; You, R.; Sun, F.; Zhu, S. MetaBinner: A High-Performance and Stand-Alone Ensemble Binning Method to Recover Individual Genomes from Complex Microbial Communities. *Genome Biology* **2023**, *24* (1), 1. https://doi.org/10.1186/s13059-022-02832-6.

(52) *UniteM/unitem_ms.draft.pdf at master · donovan-h-parks/UniteM*. GitHub. https://github.com/donovan-h-parks/UniteM/blob/master/unitem_ms.draft.pdf (accessed 2023-12-13).

(53) Imelfort, M.; Parks, D.; Woodcroft, B. J.; Dennis, P.; Hugenholtz, P.; Tyson, G. W. GroopM: An Automated Tool for the Recovery of Population Genomes from Related Metagenomes. *PeerJ* **2014**, *2*, e603. https://doi.org/10.7717/peerj.603.

(54) Donato, L.; Scimone, C.; Rinaldi, C.; D’Angelo, R.; Sidoti, A. New Evaluation Methods of Read Mapping by 17 Aligners on Simulated and Empirical NGS Data: An Updated Comparison of DNA- and RNA-Seq Data from Illumina and Ion Torrent Technologies. *Neural Comput & Applic* **2021**, *33* (22), 15669–15692. https://doi.org/10.1007/s00521-021-06188-z.

(55) Otto, C.; Stadler, P. F.; Hoffmann, S. Lacking Alignments? The next-Generation Sequencing Mapper Segemehl Revisited. *Bioinformatics* **2014**, *30* (13), 1837–1843. https://doi.org/10.1093/bioinformatics/btu146.

(56) Dadi, T. H.; Siragusa, E.; Piro, V. C.; Andrusch, A.; Seiler, E.; Renard, B. Y.; Reinert, K. DREAM-Yara: An Exact Read Mapper for Very Large Databases with Short Update Time. *Bioinformatics* **2018**, *34* (17), i766–i772. https://doi.org/10.1093/bioinformatics/bty567.

(57) Kim, D.; Paggi, J. M.; Park, C.; Bennett, C.; Salzberg, S. L. Graph-Based Genome Alignment and Genotyping with HISAT2 and HISAT-Genotype. *Nat Biotechnol* **2019**, *37* (8), 907–915. https://doi.org/10.1038/s41587-019-0201-4.

(58) Li, H.; Durbin, R. Fast and Accurate Short Read Alignment with Burrows–Wheeler Transform. *Bioinformatics* **2009**, *25* (14), 1754–1760. https://doi.org/10.1093/bioinformatics/btp324.

(59) Langmead, B.; Salzberg, S. L. Fast Gapped-Read Alignment with Bowtie 2. *Nat Methods* **2012**, *9* (4), 357–359. https://doi.org/10.1038/nmeth.1923.

(60) Marco-Sola, S.; Sammeth, M.; Guigó, R.; Ribeca, P. The GEM Mapper: Fast, Accurate and Versatile Alignment by Filtration. *Nat Methods* **2012**, *9* (12), 1185–1188. https://doi.org/10.1038/nmeth.2221.

(61) LoTempio, J.; Délot, E.; Vilain, E. Benchmarking Long-Read Genome Sequence Alignment Tools for Human Genomics Applications. bioRxiv June 20, 2023, p 2021.07.09.451840. https://doi.org/10.1101/2021.07.09.451840.

(62) Yildiz, G.; Zanini, S. F.; Afsharyan, N. P.; Obermeier, C.; Snowdon, R. J.; Golicz, A. A. Benchmarking Oxford Nanopore Read Alignment-Based Insertion and Deletion Detection in Crop Plant Genomes. *The Plant Genome* **2023**, *16* (2), e20314. https://doi.org/10.1002/tpg2.20314.

(63) Marić, J.; Sović, I.; Križanović, K.; Nagarajan, N.; Šikić, M. Graphmap2 - Splice-Aware RNA-Seq Mapper for Long Reads. bioRxiv July 30, 2019, p 720458. https://doi.org/10.1101/720458.

(64) Ren, J.; Chaisson, M. J. P. Lra: A Long Read Aligner for Sequences and Contigs. *PLOS Computational Biology* **2021**, *17* (6), e1009078. https://doi.org/10.1371/journal.pcbi.1009078.

(65) Sedlazeck, F. J.; Rescheneder, P.; Smolka, M.; Fang, H.; Nattestad, M.; von Haeseler, A.; Schatz, M. C. Accurate Detection of Complex Structural Variations Using Single-Molecule Sequencing. *Nat Methods* **2018**, *15* (6), 461–468. https://doi.org/10.1038/s41592-018-0001-7.

(66) Jain, C.; Rhie, A.; Hansen, N. F.; Koren, S.; Phillippy, A. M. Long-Read Mapping to Repetitive Reference Sequences Using Winnowmap2. *Nat Methods* **2022**, *19* (6), 705–710. https://doi.org/10.1038/s41592-022-01457-8.

(67) Hackl, T.; Hedrich, R.; Schultz, J.; Förster, F. Proovread : Large-Scale High-Accuracy PacBio Correction through Iterative Short Read Consensus. *Bioinformatics* **2014**, *30* (21), 3004–3011. https://doi.org/10.1093/bioinformatics/btu392.

(68) Nicholls, S. M.; Quick, J. C.; Tang, S.; Loman, N. J. Ultra-Deep, Long-Read Nanopore Sequencing of Mock Microbial Community Standards. *GigaScience* **2019**, *8* (5), giz043. https://doi.org/10.1093/gigascience/giz043.

(69) Mikheenko, A.; Saveliev, V.; Gurevich, A. MetaQUAST: Evaluation of Metagenome Assemblies. *Bioinformatics* **2016**, *32* (7), 1088–1090. https://doi.org/10.1093/bioinformatics/btv697.

(70) Meyer, F.; Hofmann, P.; Belmann, P.; Garrido-Oter, R.; Fritz, A.; Sczyrba, A.; McHardy, A. C. AMBER: Assessment of Metagenome BinnERs. *GigaScience* **2018**, *7* (6), giy069. https://doi.org/10.1093/gigascience/giy069.

(71) Parks, D. H.; Imelfort, M.; Skennerton, C. T.; Hugenholtz, P.; Tyson, G. W. CheckM: Assessing the Quality of Microbial Genomes Recovered from Isolates, Single Cells, and Metagenomes. *Genome Res.* **2015**, *25* (7), 1043–1055. https://doi.org/10.1101/gr.186072.114.

(72) Chaumeil, P.-A.; Mussig, A. J.; Hugenholtz, P.; Parks, D. H. GTDB-Tk: A Toolkit to Classify Genomes with the Genome Taxonomy Database. *Bioinformatics* **2020**, *36* (6), 1925–1927. https://doi.org/10.1093/bioinformatics/btz848.

(73) Wick, R. R.; Holt, K. E. Polypolish: Short-Read Polishing of Long-Read Bacterial Genome Assemblies. *PLOS Computational Biology* **2022**, *18* (1), e1009802. https://doi.org/10.1371/journal.pcbi.1009802.

(74) Singleton, C. M.; Petriglieri, F.; Kristensen, J. M.; Kirkegaard, R. H.; Michaelsen, T. Y.; Andersen, M. H.; Kondrotaite, Z.; Karst, S. M.; Dueholm, M. S.; Nielsen, P. H.; Albertsen, M. Connecting Structure to Function with the Recovery of over 1000 High-Quality Metagenome-Assembled Genomes from Activated Sludge Using Long-Read Sequencing. *Nat Commun* **2021**, *12* (1), 2009. https://doi.org/10.1038/s41467-021-22203-2.

(75) Albertsen, M.; Karst, S. M.; Ziegler, A. S.; Kirkegaard, R. H.; Nielsen, P. H. Back to Basics – The Influence of DNA Extraction and Primer Choice on Phylogenetic Analysis of Activated Sludge Communities. *PLOS ONE* **2015**, *10* (7), e0132783. https://doi.org/10.1371/journal.pone.0132783.

(76) Weber, L.; DeForce, E.; Apprill, A. Optimization of DNA Extraction for Advancing Coral Microbiota Investigations. *Microbiome* **2017**, *5* (1), 18. https://doi.org/10.1186/s40168-017-0229-y.

(77) Martin-Laurent, F.; Philippot, L.; Hallet, S.; Chaussod, R.; Germon, J. C.; Soulas, G.; Catroux, G. DNA Extraction from Soils: Old Bias for New Microbial Diversity Analysis Methods. *Applied and Environmental Microbiology* **2001**, *67* (5), 2354–2359. https://doi.org/10.1128/AEM.67.5.2354-2359.2001.

(78) *Nanopore Community*. Oxford Nanopore Technologies. https://nanoporetech.com/community (accessed 2023-04-05).

(79) Sakoula, D.; Smith, G. J.; Frank, J.; Mesman, R. J.; Kop, L. F. M.; Blom, P.; Jetten, M. S. M.; van Kessel, M. A. H. J.; Lücker, S. Universal Activity-Based Labeling Method for Ammonia- and Alkane-Oxidizing Bacteria. *ISME J* **2022**, *16* (4), 958–971. https://doi.org/10.1038/s41396-021-01144-0.

(80) *BBMap*. SourceForge. https://sourceforge.net/projects/bbmap/ (accessed 2023-02-14).

(81) Wick, R. Porechop, 2023. https://github.com/rrwick/Porechop (accessed 2023-02-14).

(82) Wick, R. R.; Judd, L. M.; Gorrie, C. L.; Holt, K. E. Unicycler: Resolving Bacterial Genome Assemblies from Short and Long Sequencing Reads. *PLOS Computational Biology* **2017**, *13* (6), e1005595. https://doi.org/10.1371/journal.pcbi.1005595.

(83) Damme, R. V.; Hölzer, M.; Viehweger, A.; Müller, B.; Bongcam-Rudloff, E.; Brandt, C. Metagenomics Workflow for Hybrid Assembly, Differential Coverage Binning, Metatranscriptomics and Pathway Analysis (MUFFIN). *PLOS Computational Biology* **2021**, *17* (2), e1008716. https://doi.org/10.1371/journal.pcbi.1008716.

(84) Stewart, R. D.; Auffret, M. D.; Warr, A.; Walker, A. W.; Roehe, R.; Watson, M. Compendium of 4,941 Rumen Metagenome-Assembled Genomes for Rumen Microbiome Biology and Enzyme Discovery. *Nat Biotechnol* **2019**, *37* (8), 953–961. https://doi.org/10.1038/s41587-019-0202-3.

(85) Overholt, W. A.; Hölzer, M.; Geesink, P.; Diezel, C.; Marz, M.; Küsel, K. Inclusion of Oxford Nanopore Long Reads Improves All Microbial and Viral Metagenome-Assembled Genomes from a Complex Aquifer System. *Environmental Microbiology* **2020**, *22* (9), 4000–4013. https://doi.org/10.1111/1462-2920.15186.

(86) Zablocki, O.; Michelsen, M.; Burris, M.; Solonenko, N.; Warwick-Dugdale, J.; Ghosh, R.; Pett-Ridge, J.; Sullivan, M. B.; Temperton, B. VirION2: A Short- and Long-Read Sequencing and Informatics Workflow to Study the Genomic Diversity of Viruses in Nature. *PeerJ* **2021**, *9*, e11088. https://doi.org/10.7717/peerj.11088.

(87) *When to stop polishing? · Issue #83 · isovic/racon*. GitHub. https://github.com/isovic/racon/issues/83 (accessed 2024-02-07).

(88) Jin, H.; You, L.; Zhao, F.; Li, S.; Ma, T.; Kwok, L.-Y.; Xu, H.; Sun, Z. Hybrid, Ultra-Deep Metagenomic Sequencing Enables Genomic and Functional Characterization of Low-Abundance Species in the Human Gut Microbiome. *Gut Microbes* **2022**, *14* (1), 2021790. https://doi.org/10.1080/19490976.2021.2021790.

(89) Liu, L.; Yang, Y.; Deng, Y.; Zhang, T. Nanopore Long-Read-Only Metagenomics Enables Complete and High-Quality Genome Reconstruction from Mock and Complex Metagenomes. *Microbiome* **2022**, *10* (1), 209. https://doi.org/10.1186/s40168-022-01415-8.

(90) *Question: How many iterations of Racon polishing should I expect??? · Issue #51 · rrwick/Unicycler*. GitHub. https://github.com/rrwick/Unicycler/issues/51 (accessed 2024-02-07).

(91) Li, H. Minimap2: Pairwise Alignment for Nucleotide Sequences. *Bioinformatics* **2018**, *34* (18), 3094–3100. https://doi.org/10.1093/bioinformatics/bty191.

(92) SorenKarst. Mmlong, 2022. https://github.com/SorenKarst/mmlong (accessed 2023-02-14).

(93) Mistry, J.; Chuguransky, S.; Williams, L.; Qureshi, M.; Salazar, G. A.; Sonnhammer, E. L. L.; Tosatto, S. C. E.; Paladin, L.; Raj, S.; Richardson, L. J.; Finn, R. D.; Bateman, A. Pfam: The Protein Families Database in 2021. *Nucleic Acids Research* **2021**, *49* (D1), D412–D419. https://doi.org/10.1093/nar/gkaa913.

(94) Ramette, A. Multivariate Analyses in Microbial Ecology. *FEMS Microbiology Ecology* **2007**, *62* (2), 142–160. https://doi.org/10.1111/j.1574-6941.2007.00375.x.

(95) Birks, H. J. B.; Deacon, J. A Numerical Analysis of the Past and Present Flora of the British Isles. *New Phytologist* **1973**, *72* (4), 877–902. https://doi.org/10.1111/j.1469-8137.1973.tb02065.x.

(96) Beals, E. W. Bray-Curtis Ordination: An Effective Strategy for Analysis of Multivariate Ecological Data. In *Advances in Ecological Research*; MacFadyen, A., Ford, E. D., Eds.; Academic Press, 1984; Vol. 14, pp 1–55. https://doi.org/10.1016/S0065-2504(08)60168-3.

(97) Kuczynski, J.; Liu, Z.; Lozupone, C.; McDonald, D.; Fierer, N.; Knight, R. Microbial Community Resemblance Methods Differ in Their Ability to Detect Biologically Relevant Patterns. *Nat Methods* **2010**, *7* (10), 813–819. https://doi.org/10.1038/nmeth.1499.

(98) Krakau, S.; Straub, D.; Gourlé, H.; Gabernet, G.; Nahnsen, S. Nf-Core/Mag: A Best-Practice Pipeline for Metagenome Hybrid Assembly and Binning. *NAR Genomics and Bioinformatics* **2022**, *4* (1), lqac007. https://doi.org/10.1093/nargab/lqac007.

(99) Ravi, A.; Troncoso-Rey, P.; Ahn-Jarvis, J.; Corbin, K. R.; Harris, S.; Harris, H.; Aydin, A.; Kay, G. L.; Le Viet, T.; Gilroy, R.; Pallen, M. J.; Page, A. J.; O’Grady, J.; Warren, F. J. Hybrid Metagenome Assemblies Link Carbohydrate Structure with Function in the Human Gut Microbiome. *Commun Biol* **2022**, *5* (1), 1–13. https://doi.org/10.1038/s42003-022-03865-0.

(100) Shaffer, M.; Borton, M. A.; McGivern, B. B.; Zayed, A. A.; La Rosa, S. L.; Solden, L. M.; Liu, P.; Narrowe, A. B.; Rodríguez-Ramos, J.; Bolduc, B.; Gazitúa, M. C.; Daly, R. A.; Smith, G. J.; Vik, D. R.; Pope, P. B.; Sullivan, M. B.; Roux, S.; Wrighton, K. C. DRAM for Distilling Microbial Metabolism to Automate the Curation of Microbiome Function. *Nucleic Acids Research* **2020**, *48* (16), 8883–8900. https://doi.org/10.1093/nar/gkaa621.

(101) Manni, M.; Berkeley, M. R.; Seppey, M.; Simão, F. A.; Zdobnov, E. M. BUSCO Update: Novel and Streamlined Workflows along with Broader and Deeper Phylogenetic Coverage for Scoring of Eukaryotic, Prokaryotic, and Viral Genomes. *Molecular Biology and Evolution* **2021**, *38* (10), 4647–4654. https://doi.org/10.1093/molbev/msab199.

(102) Hyatt, D.; Chen, G.-L.; LoCascio, P. F.; Land, M. L.; Larimer, F. W.; Hauser, L. J. Prodigal: Prokaryotic Gene Recognition and Translation Initiation Site Identification. *BMC Bioinformatics* **2010**, *11* (1), 119. https://doi.org/10.1186/1471-2105-11-119.

(103) Clark, S. C.; Egan, R.; Frazier, P. I.; Wang, Z. ALE: A Generic Assembly Likelihood Evaluation Framework for Assessing the Accuracy of Genome and Metagenome Assemblies. *Bioinformatics* **2013**, *29* (4), 435–443. https://doi.org/10.1093/bioinformatics/bts723.

(104) Oksanen, J.; Simpson, G. L.; Blanchet, F. G.; Kindt, R.; Legendre, P.; Minchin, P. R.; O’Hara, R. B.; Solymos, P.; Stevens, M. H. H.; Szoecs, E.; Wagner, H.; Barbour, M.; Bedward, M.; Bolker, B.; Borcard, D.; Carvalho, G.; Chirico, M.; Caceres, M. D.; Durand, S.; Evangelista, H. B. A.; FitzJohn, R.; Friendly, M.; Furneaux, B.; Hannigan, G.; Hill, M. O.; Lahti, L.; McGlinn, D.; Ouellette, M.-H.; Cunha, E. R.; Smith, T.; Stier, A.; Braak, C. J. F. T.; Weedon, J. *Vegan: Community Ecology Package*; 2022.

(105) R Core Team. *R: A Language and Environment for Statistical Computing*; R Foundation for Statistical Computing: Vienna, Austria, 2021.
